# Supplementary material for: Ciliary extracellular vesicles are distinct from the cytosolic extracellular vesicles
Source: PubMed Central journal article supplement (PMC8077156; doi:10.1002/jev2.12086), 2021-04-27
Supplement: JEV2-10-e12086-s001.pdf [file JEV2-10-e12086-s001.pdf]

1  
2  
3  
4  
5  
6  
7  
8  
9  
10  
11  
12  
13  
14  
15  
16  
17  
18  
19  
20  
21  
22  
23  
24  
25  
26  
27  
28  
29  
30  
31  
32  
33  
34  
35  
36  
37  
38  
39  
40  
41  
42  
43  
44  
45  
46  
47  
48  
49  
50  
51  
52  
53  
54  
55  
56  
57  
58  
59  
60  
61  
62  
63  
64  
65

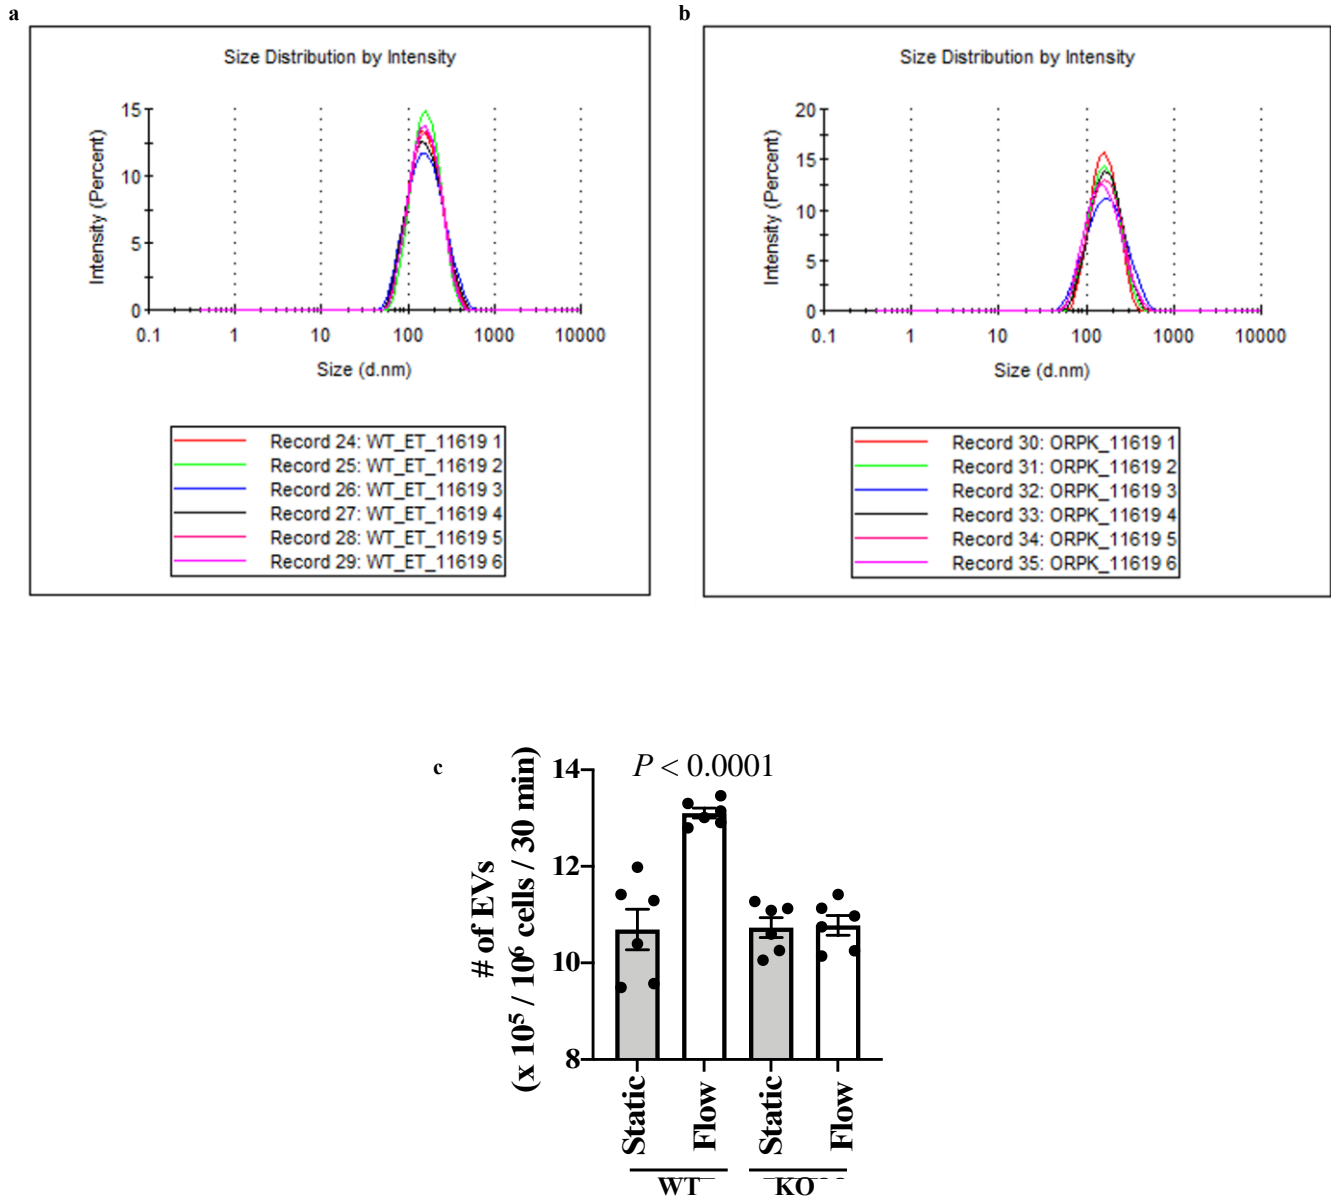

**Figure S1. Size and number of EV quantifications**

(A-B) The diameters of both WT (A) and KO (B) vesicles were measured using the dynamic light scattering.

(C) The number of EVs were significantly decreased during shear-flow in KO cells compared to control WT.

N=6 in each group.

1  
2  
3  
4  
5  
6  
7  
8  
9  
10  
11  
12  
13  
14  
15  
16  
17  
18  
19  
20  
21  
22  
23  
24  
25  
26  
27  
28  
29  
30  
31  
32  
33  
34  
35  
36  
37  
38  
39  
40  
41  
42  
43  
44  
45  
46  
47  
48  
49  
50  
51  
52  
53  
54  
55  
56  
57  
58  
59  
60  
61  
62  
63  
64  
65

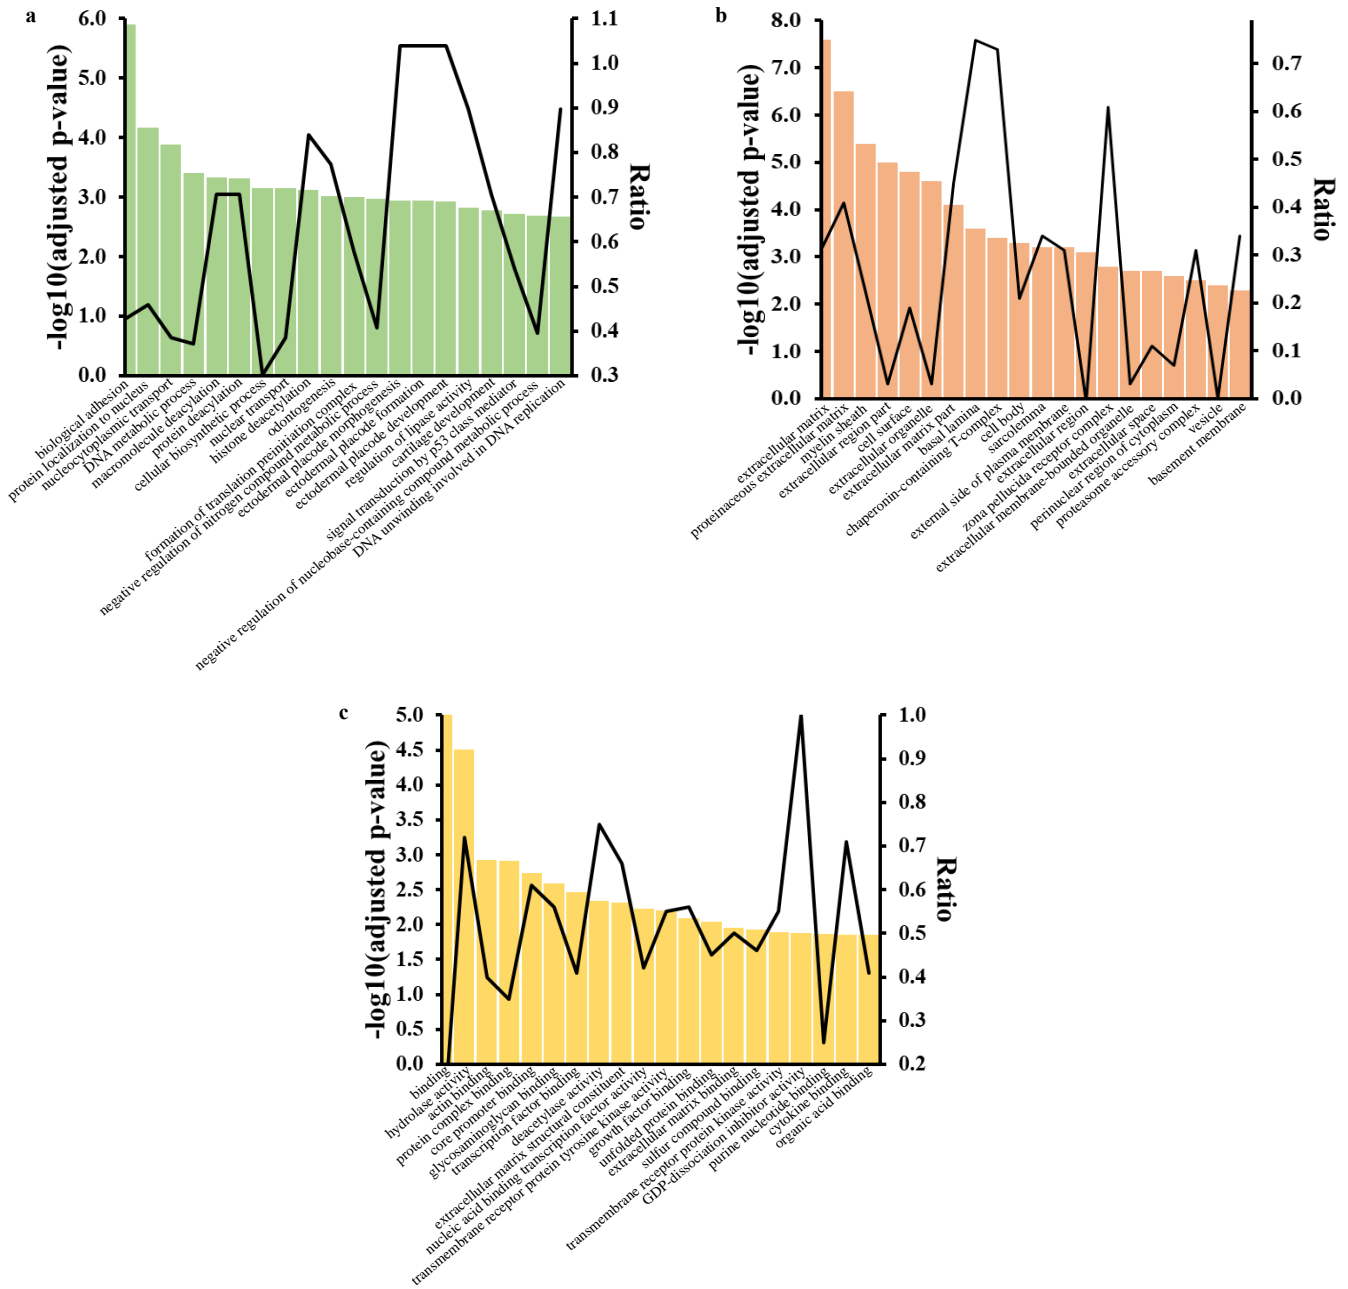

**Figure S2. Gene Ontology (GO) analysis of proteomic data**

(A-C) The ratio (line graph) and the adjusted p-value (bar graph) show results of the three different GO analyses. The ratio represents the significantly expressed genes involved over the total gene in each category of the (A) biological processes, (B) cellular component and (C) molecular function, respectively.

1  
2  
3  
4  
5  
6  
7  
8  
9  
10  
11  
12  
13  
14  
15  
16  
17  
18  
19  
20  
21  
22  
23  
24  
25  
26  
27  
28  
29  
30  
31  
32  
33  
34  
35  
36  
37  
38  
39  
40  
41  
42  
43  
44  
45  
46  
47  
48  
49  
50  
51  
52  
53  
54  
55  
56  
57  
58  
59  
60  
61  
62  
63  
64  
65

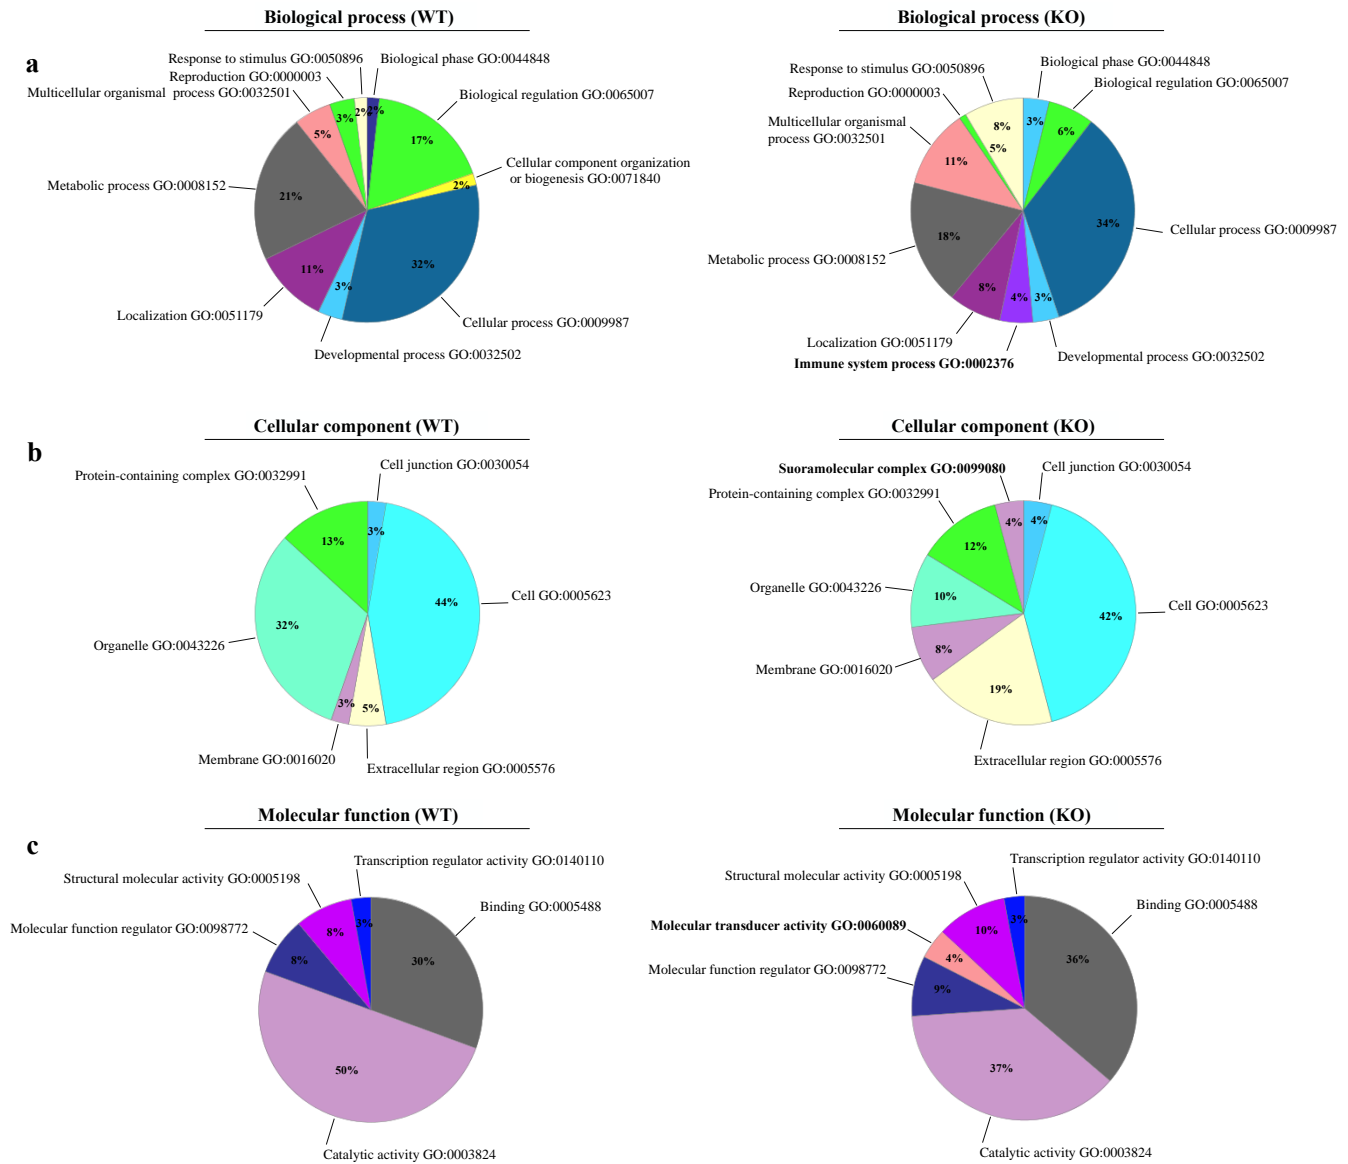

**Figure S3. Comparative GO analyses between ciliated WT and non-ciliated KO vesicles**

(A) the biological process pie chart describes the biological objective to which the gene product contributes.

(B) the cellular component pie chart describes the localization of the proteins in the cell where the gene exerts its activity.

(C) the molecular function pie chart describes the biochemical activity of a gene product. The percentages show the total protein involved in each process; bolded process indicates the difference of expression between WT and KO cell-derived vesicles; non-bolded process indicates the expression observed in both EVs.

1  
2  
3  
4  
5  
6  
7  
8  
9  
10  
11  
12  
13  
14  
15  
16  
17  
18  
19  
20  
21  
22  
23  
24  
25  
26  
27  
28  
29  
30  
31  
32  
33  
34  
35  
36  
37  
38  
39  
40  
41  
42  
43  
44  
45  
46  
47  
48  
49  
50  
51  
52  
53  
54  
55  
56  
57  
58  
59  
60  
61  
62  
63  
64  
65

**a**

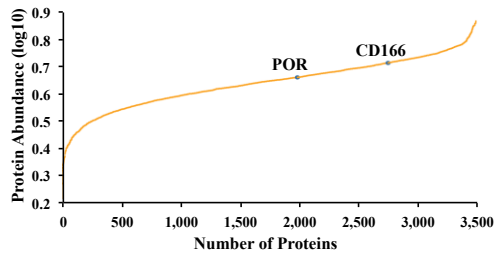

**b**

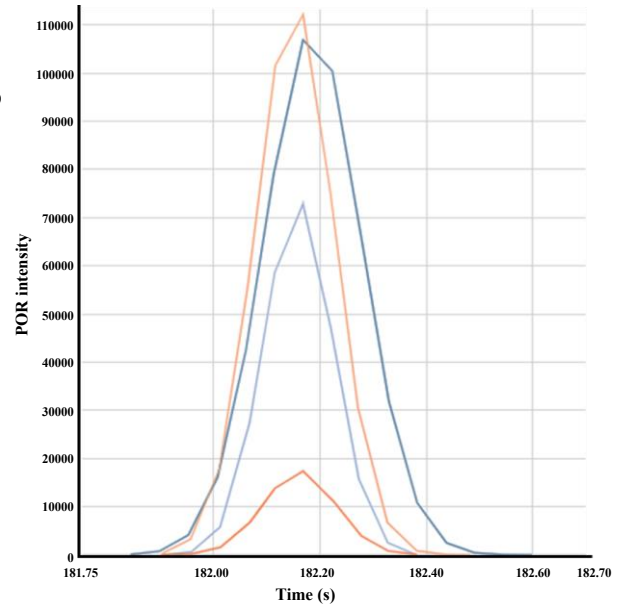

POR peptide sequence: R.EQGKEVGETLLYYGCR.R, Charge state: 2  
Ciliated samples: ●●● Non-ciliated samples: ●●●

**c**

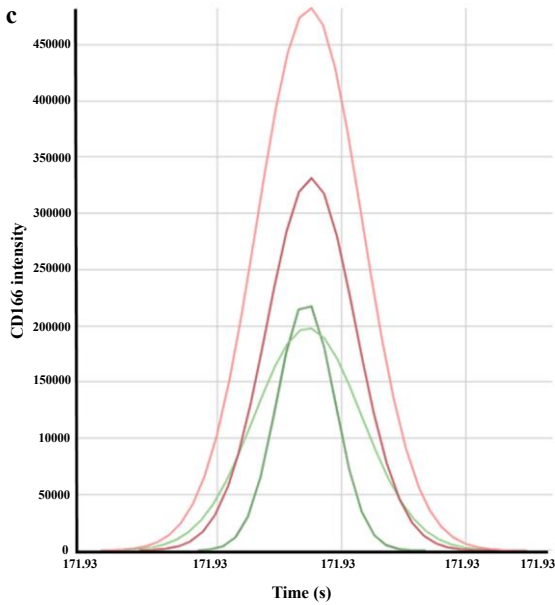

CD166 peptide sequence: R.ESLTLIVEGKPQIK.M, Charge state: 2  
Ciliated samples: ●●● Non-ciliated samples: ●●●

**d**

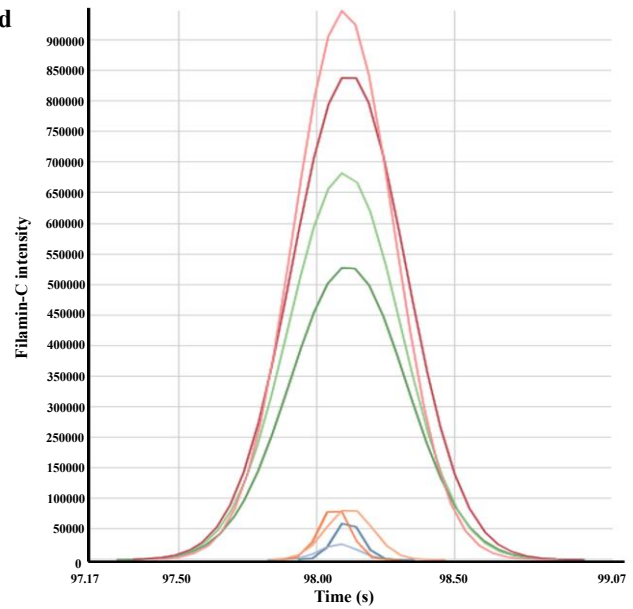

Filamin-C peptide sequence: : R.VHVQPAVDTSQIK.V, Charge state: 2  
Ciliated samples: ●●● Non-ciliated samples: ●●●

**Figure S4. Analysis of relative expressions of ciliated WT and non-ciliated KO vesicle biomarkers**

(A) line graph showing protein abundance of POR and CD166 biomarkers exclusively expressed in WT and KO cell-derived vesicles, respectively.

1  
2  
3  
4  
5  
6  
7  
8  
9  
10  
11  
12  
13  
14  
15  
16  
17  
18  
19  
20  
21  
22  
23  
24  
25  
26  
27  
28  
29  
30  
31  
32  
33  
34  
35  
36  
37  
38  
39  
40  
41  
42  
43  
44  
45  
46  
47  
48  
49  
50  
51  
52  
53  
54  
55  
56  
57  
58  
59  
60  
61  
62  
63  
64  
65

(B-D) chromatographs indicating the detection of POR , CD166 and filamin-C.

(B) POR peptide was detected at 182 second in the four independent samples from ciliated WT cells (blue, light blue, orange and light orange).

(C) CD166 peptide was detected at 171 second in the four independent samples from non-ciliated KO cells (green, light green, red and light red).

(D) Differentially expressed filamin-C peptide between WT and KO cell-derived vesicles was detected at 98 second (blue, light blue, orange, light orange, green, light green, red and light red).

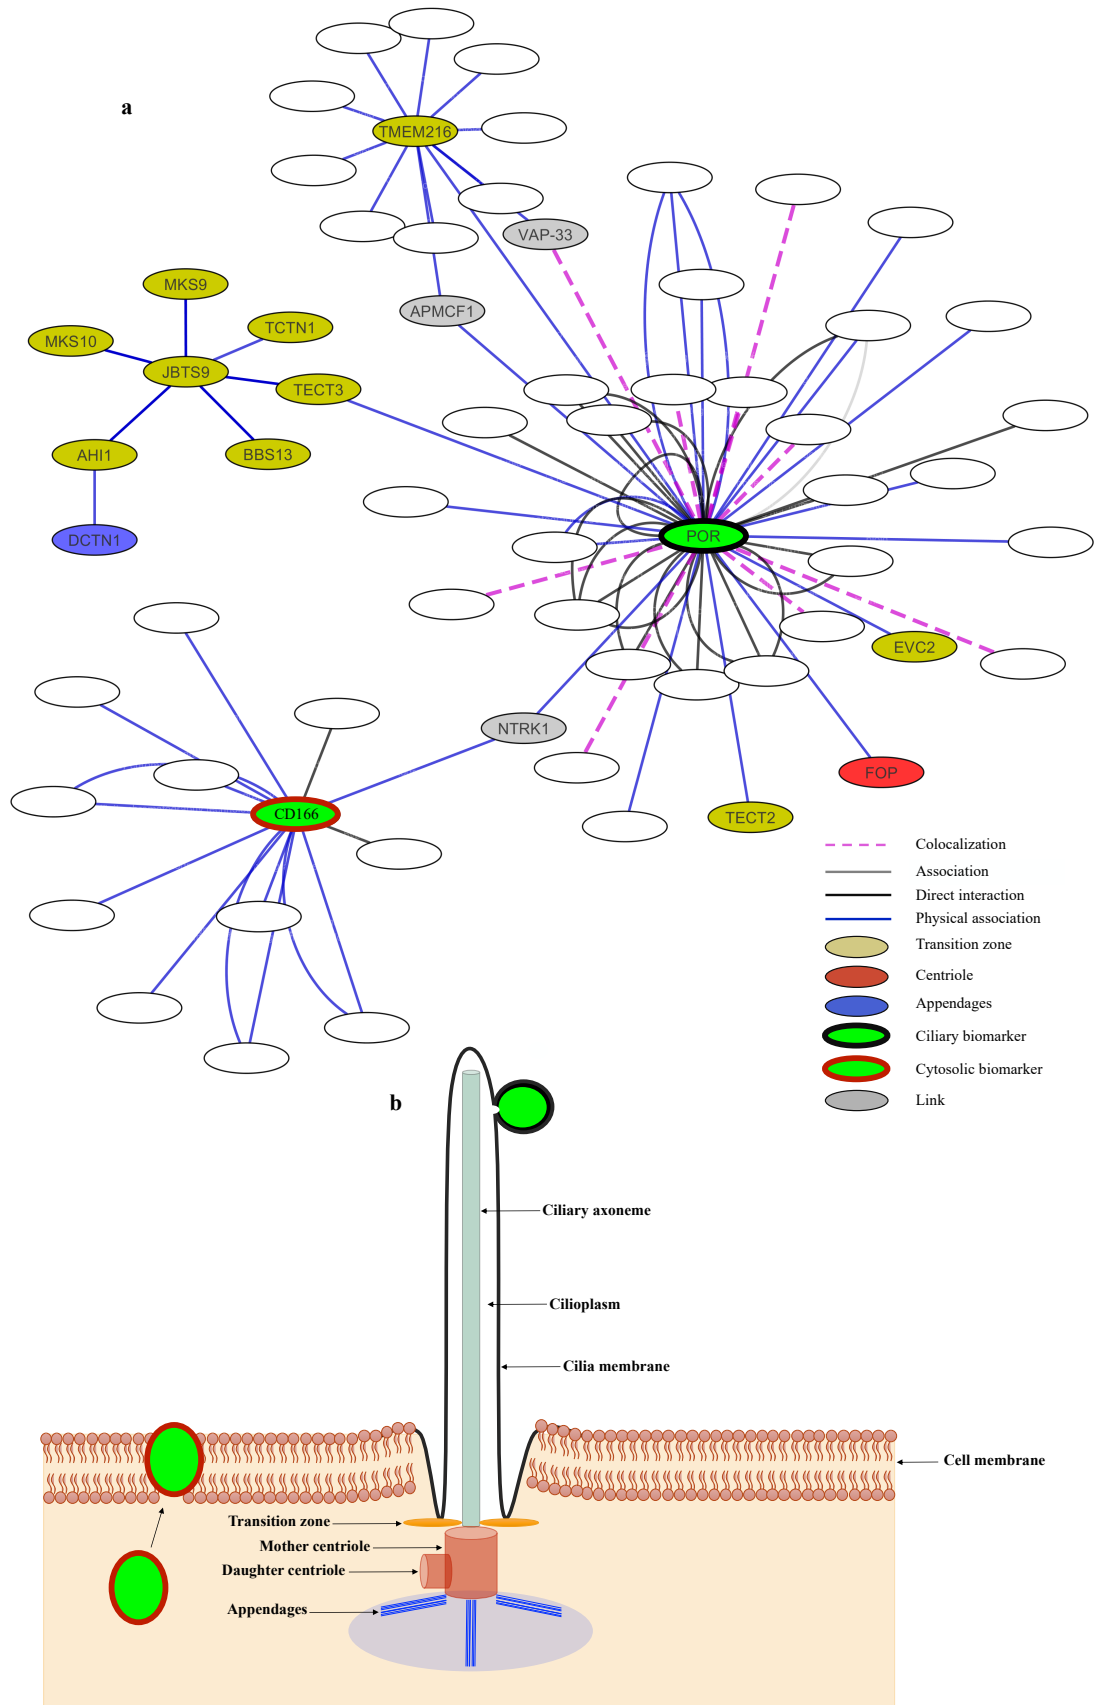

1  
2  
3  
4  
5  
6  
7  
8  
9  
10  
11  
12  
13  
14  
15  
16  
17  
18  
19  
20  
21  
22  
23  
24  
25  
26  
27  
28  
29  
30  
31  
32  
33  
34  
35  
36  
37  
38  
39  
40  
41  
42  
43  
44  
45  
46  
47  
48  
49  
50  
51  
52  
53  
54  
55  
56  
57  
58  
59  
60  
61  
62  
63  
64  
65

**Figure S5. Network interaction among POR, CD166 and other ciliary proteins**

(A) a network interaction analysis shows POR and CD166 interaction with other sub-ciliary compartments proteins (orange, transition zone; red, centriole; blue, appendages).

(B) a primary cilia sketch indicates each sub-ciliary compartment with its given color and localization of ciliary and cytosolic vesicles within the cell.

a

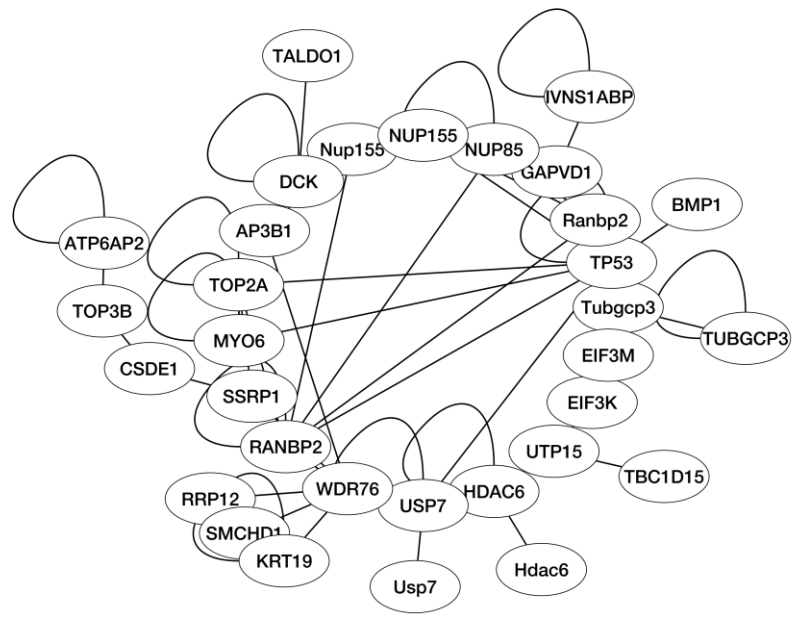

b

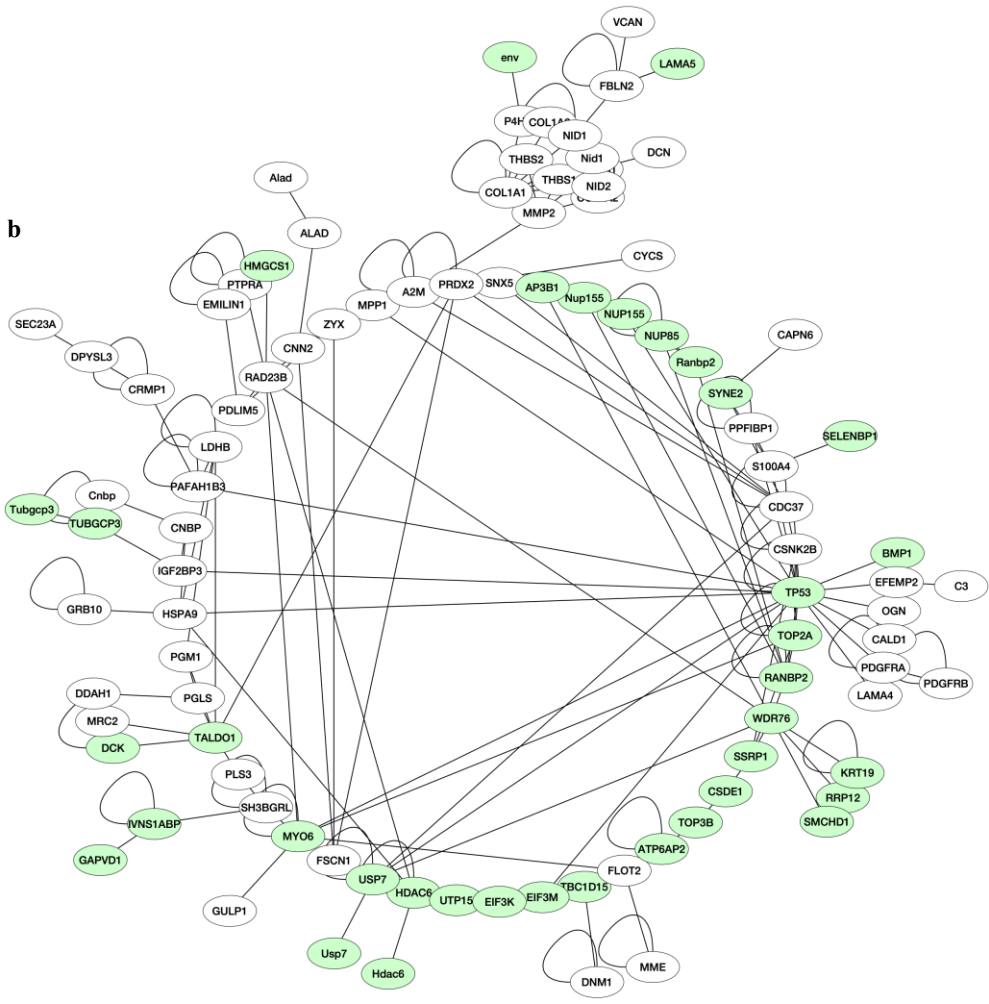



1  
2  
3  
4  
5  
6  
7  
8  
9  
10  
11  
12  
13  
14  
15  
16  
17  
18  
19  
20  
21  
22  
23  
24  
25  
26  
27  
28  
29  
30  
31  
32  
33  
34  
35  
36  
37  
38  
39  
40  
41  
42  
43  
44  
45  
46  
47  
48  
49  
50  
51  
52  
53  
54  
55  
56  
57  
58  
59  
60  
61  
62  
63  
64  
65

**Figure S6. Network interaction among proteins expressed in ciliated WT vesicles**

(A) a network interaction analysis shows interaction among proteins that are exclusively expressed in WT (Table S3).

(B) a network interaction analysis shows interaction among proteins that are exclusively expressed in ciliated WT vesicles (color light green) and proteins that are expressed in both ciliated WT and non-ciliated KO vesicles (color white).

1  
2  
3  
4  
5  
6  
7  
8  
9  
10  
11  
12  
13  
14  
15  
16  
17  
18  
19  
20  
21  
22  
23  
24  
25  
26  
27  
28  
29  
30  
31  
32  
33  
34  
35  
36  
37  
38  
39  
40  
41  
42  
43  
44  
45  
46  
47  
48  
49  
50  
51  
52  
53  
54  
55  
56  
57  
58  
59  
60  
61  
62  
63  
64  
65

**Table S1.** Analysis of protein compositions from isolated WT and KO cell-derived vesicles has revealed 3,444 protein fractions.

**Table S2.** Only 748 proteins fractions with significance P-value  $\leq 0.05$  are further analyzed.

**Table S3.** Shown here are 79 protein fractions expressed exclusively in isolated EVs from WT (ciliated cells) after inducing the release of ciliary vesicle by fluid-shear flow.

**Table S4.** Shown here are 145 protein fractions expressed exclusively in isolated EVs from KO (non-ciliated cells) after inducing the release of ciliary vesicle by fluid-shear flow.

**Table S5.** Shown here are 524 proteins expressed in both ciliated WT and non-ciliated KO cell-derived vesicles.

**Table S6.** Shown here are top 100 extracellular vesicle biomarkers matched to the proteomic dataset (Figure 2 e,f).

**Table S7.** A comparative analysis with primary cilia targeted vesicle study (exocyst-containing vesicles) shows the overlap with an extended list of our significantly expressed EV proteome.

**Table S8.** Shown here are the list of 30 exclusively expressed EV proteins isolated from ciliary WT (Table S3) that matched with known cilia specific markers.

1  
2  
3  
4 **Supplemental Information**  
5  
6  
7

8 **Ciliary extracellular vesicles are distinct from the cytosolic extracellular vesicles.**  
9

10  
11 **Authors:** Ashraf M. Mohieldin<sup>1,3</sup>, Rajasekharreddy Pala<sup>1</sup>, Richard Beuttler<sup>1</sup>, James J. Moresco<sup>2</sup>,  
12 John R. Yates, III<sup>2</sup>, Surya M. Nauli<sup>1,3</sup>  
13  
14  
15  
16  
17  
18

19 **Cell culture**  
20

21 Ciliated (control) and non-ciliated (*IFT88*) mouse knockout endothelial cells were cultured in Dulbecco's  
22 Modified Eagle Medium (DMEM) (*Corning Cellgro*), 10% fetal bovine serum (FBS) (*HyClone*) and 1%  
23 penicillin/streptomycin (*Corning Cellgro*) at 37°C in a 5% CO<sub>2</sub> incubator. Prior to all experiments, cells  
24 at 70-80% confluence were differentiated for 24-48 hours in serum-free and EV-free media  
25 (*ThermoFisher*).  
26  
27  
28  
29  
30  
31  
32  
33  
34  
35  
36

37 **Isolation of WT and KO cell-derived vesicles**  
38

39 To isolate ciliary vesicles from WT and KO endothelial cells, cells were grown in a 150-mm culture dish  
40 in quadruplicate and special vesicle-depleted media was used (*ThermoFisher*). At 70-80% confluence, cell  
41 culture dishes were placed on an orbital shaker (*Cole-Parmer*) for 30 minutes at 350 rotations per minute  
42 (2.0 dyn/cm<sup>2</sup>). Growth media was then collected respectively and spun at four different speeds: 300×g  
43 for 10 minutes, 2,000×g for 10 minutes (*ThermoFisher*; Heraeus Megafuge 8R) 10,000×g for 30 minutes  
44 and 100,000×g for 70 minutes (*ThermoFisher*; Sorvall wx+ ultra series centrifuge; Rotor: AH-629). The  
45 supernatants were collected in all first three rounds of centrifugation. In the fourth round of centrifugation,  
46 the supernatants were discarded, and the vesicle pellets were re-suspended in cold-PBS for another  
47 centrifugation at 100,000×g for 70 minutes to ensure purity of the isolated vesicles. Vesicle pellets were  
48  
49  
50  
51  
52  
53  
54  
55  
56  
57  
58  
59  
60  
61  
62  
63  
64  
65

1  
2  
3  
4 then re-suspended in either PBS, Radioimmunoprecipitation assay buffer (RIPA buffer), or 2.5%  
5  
6 glutaraldehyde for different analyses.  
7  
8  
9

### 10 11 **Scanning electron microscopy**

12  
13  
14 Re-suspended vesicle pellets were fixed in 2.5% glutaraldehyde and kept for overnight at 4°C. Vesicles  
15  
16 were then washed three times with PBS, dehydrated through a graded series of ethanol for 10 minutes  
17  
18 each, and incubated in hexamethyldisilazane for 1 hour on ice. Samples were then mounted, air dried,  
19  
20 sputter-coated with gold, and examined under Zeiss SEM microscope (ZEISS; Sigma 300).  
21  
22  
23  
24  
25

### 26 27 **Transmission electron microscopy**

28  
29 Isolated vesicles from control and *IFT88* knockout endothelial cells were re-suspended in PBS at room  
30  
31 temperature. Carbon/formvar copper grids (*Electron Microscopy Sciences*) were glow discharged under  
32  
33 ultraviolet light (UV) for one hour. Diluted vesicles were loaded into the grids for 30 minutes. Vesicles  
34  
35 were then blocked with 1% BSA, washed with PBS, incubated with anti-rabbit POR antibody (*Abcam*),  
36  
37 washed with PBS, incubated with 5 nm rabbit IgG gold conjugate nanoparticle (*Nanocs*), washed with  
38  
39 PBS, and negatively stained with 2% uranylless acetate and 3% lead citrate (*Electron Microscopy*  
40  
41 *Sciences*). The vesicles were examined under a JEOL JEM-2100F microscope operated at 200kV with a  
42  
43 Field Emission electron source. Images were recorded on a Gatan OneView camera at magnification of  
44  
45 40,000x, corresponding to 2.8 angstrom per pixel at specimen space.  
46  
47  
48  
49  
50  
51  
52

### 53 54 **Immunocytochemistry**

55  
56 Cells were stained following a standard protocol, as described previously [1]. Briefly, cells were washed  
57  
58 with sodium cacodylate buffer, incubated in 3% glutaraldehyde for 10 minutes, incubated in 1% Triton-  
59  
60  
61  
62  
63  
64  
65

1  
2  
3  
4 X for 5 minutes, and all primary antibodies were diluted in a 10% FBS solution. Primary antibodies for  
5  
6 golgi-97 (1:500, *cell signaling*), HSP70 (1:100, *Abcam*), CD166 (1:500, *Abcam*), POR (1:500, *Abcam*),  
7  
8 and acetylated- $\alpha$ -tubulin (1:1000, *Sigma*), were incubated for overnight at 4°C. The secondary antibodies  
9  
10 FITC fluorescence (1:500, *Pierce*) and Texas-Red fluorescence (1:500, *Pierce*) were diluted in a 10% FBS  
11  
12 solution, and incubated for 1 hour at room temperature. Cells were then rinsed with cacodylate buffer,  
13  
14 mounted with DAPI (*Vector laboratories*), and images were taken with Nikon Ti-E using Nikon Element  
15  
16 software. To take advantage of the naturally rigid cilium, we used Tungsten microwire to enable imaging  
17  
18 single cells from the side as discussed previously [2, 3]. This strategy would overcome the issues with  
19  
20 optical distortions of traditional 2-dimensional cell imaging. For our studies, we previously ordered the  
21  
22 precision microwire from H.P. Reid, Inc. in Palm Coast, FL. Because the company has ceased to exist, a  
23  
24 replacement of the Tungsten microwire can be obtained through Luma Metall AB, Sweden (Wire quality  
25  
26 #823; Surface finish #42). The precision microwire was prepared by coating the wire with type I collagen  
27  
28 (50  $\mu$ g/mL in 0.02N acetic acid) to provide a conducive surface for cell attachment and growth. The  
29  
30 microwires were then UV-sterilized for 30 min and mounted on the imaging chamber before seeding the  
31  
32 cells. If needed the microwire can be gently rotated to observe the confluency of the cells around the  
33  
34 microwire.  
35  
36  
37  
38  
39  
40  
41  
42  
43  
44

## 45 **Immunoblotting**

46  
47 Re-suspended vesicle pellets in RIPA buffer containing protease inhibitor (*Roche*) were vortexed for 30  
48  
49 minutes and centrifuged for 15 minutes at 10,000 $\times$ g (*accuSpin Micro 17, Fisher scientific*). Concentration  
50  
51 of protein lysates were then determined using Pierce BCA Protein Assay Kit (*Thermo Fisher Scientific*),  
52  
53 and protein lysates were then analyzed in a standard 10% gradient sodium dodecyl sulfate-polyacrylamide  
54  
55 gel electrophoresis (SDS-PAGE). To confirm equal loading, gels were stained with Coomassie blue dye  
56  
57  
58  
59  
60  
61  
62  
63  
64  
65

1  
2  
3  
4 (*Bio-Rad*, blue R-250), washed with de-staining solution (*Bio-Rad*), and imaged with the ChemiDoc  
5  
6 XRS+ system (*Bio-Rad*). Using the dry method, proteins were transferred to nitrocellulose membrane  
7  
8 (*Thermo Fisher Scientific*) and blocked with 5% milk. Membranes were then incubated with primary  
9  
10 antibodies (1:500, POR; 1:500, CD166; 1: 500, golgi-97; and 1:100, HSP70) for overnight at 4°C and  
11  
12 secondary antibodies (1:1000 for both anti-mouse and anti-rabbit) for 1 hour at room temperature.  
13  
14  
15 Membrane was then rinsed and imaged with the ChemiDoc XRS+ system (*Bio-Rad*).  
16  
17  
18  
19  
20

## 21 **Proteomic analyses**

22  
23 Samples preparation: Vesicle pellets from four independent samples of control wild-type and *IFT88* (total  
24  
25 of 8 samples) were re-suspended in RIPA buffer. Samples were next reduced with 5 mM TCEP  
26  
27 (*ThermoFisher*) and alkylated in the dark for 15 minutes with 10 mM iodoacetamide (*ThermoFisher*).  
28  
29 Protein samples were then digested for 18 hours at 37°C in 2 M urea, 100 mM Tris, 1 mM calcium chloride  
30  
31 and 2 µg of trypsin (*Promega*), followed by 5% formic acid neutralization.  
32  
33

34  
35 Liquid chromatography with tandem mass spectrometry (LC-MS-MS): The digested protein samples  
36  
37 were run through a strong cation exchange column coupled by reverse phase separation to enhance the  
38  
39 separation power and dynamic range of analysis [4]. The column was next washed with 95% water, 5%  
40  
41 acetonitrile, and 10% formic acid. In series of steps, the column was next attached and analyzed with an  
42  
43 Agilent 1100 quaternary pump and a LTQ Orbitrap Velos (*ThermoFisher*), with an in-house built  
44  
45 electrospray stage, as described previously [5]. Proteins identification and quantitation were analyzed  
46  
47 with the Integrated Proteomics Applications (San Diego, CA.). Tandem mass spectra were extracted from  
48  
49 raw files using RawExtract (Version 1.9.9) [6], and were searched against Uniprot mus musculus database  
50  
51 with reversed sequences using ProLuCID [7]. Peptide candidates were filtered using DTASelect program  
52  
53  
54  
55  
56  
57  
58  
59  
60  
61  
62  
63  
64  
65

1  
2  
3  
4 (version 2.0). Each separation was performed and clustered independently for all eight samples. Proteins  
5  
6 obtained from the different separations were categorized in terms of types and percentage of enrichment.  
7  
8  
9 Protein data profiling: The proteomic data were analyzed based on the spectral count abundance. The p-  
10  
11 value for each protein entry was calculated using Microsoft Excel (version 15.4; Table S1). Protein  
12  
13 fractions with  $P$  value  $\leq 0.05$  were further analyzed (Table S2). Based on our proteomic comparative  
14  
15 analysis, all highly significant protein candidates that were not present (zero spectral count) in non-ciliated  
16  
17 *IFT88* knockout cells were categorized as WT vesicles exclusive proteins (Table 3). Similarly, highly  
18  
19 significant protein candidates that appeared only in non-ciliated *IFT88*, and not in ciliated control cells,  
20  
21 were categorized as proteins exclusively expressed in KO vesicles (Table 4). Proteins that were highly  
22  
23 significant and present in both vesicles were tabulated separately and categorized as proteins shared  
24  
25 between WT and KO cell-derived vesicles (Table 5). To calculate the fold changes in protein expressions,  
26  
27 the averaged spectrum count of each protein in wild-type control samples was divided by the averaged  
28  
29 spectrum count of each protein in *IFT88* samples.  
30  
31  
32  
33  
34  
35  
36  
37

### 38 **Bioinformatics analyses**

39  
40  
41 Gene ontology (GO) analyses: The dataset was analyzed with Ontologizer application (version 2.0) [8].  
42  
43 This application generated a set of interlinked HTML pages that presented three different categories:  
44  
45 biological processes, cellular component and molecular function. For more targeted GO analyses for  
46  
47 protein function (protein classes), signaling pathways, as well as biological processes, cellular component  
48  
49 and molecular function, Panther classification system was used (version 14.0) [9, 10].  
50  
51  
52

53 Volcano, clustering, Venn diagram and violin plots: When a dataset was not normally distributed or  
54  
55 heterogeneous variance was detected, the distributions were normalized via log transformation. Plots  
56  
57  
58  
59  
60  
61  
62  
63  
64  
65

1  
2  
3  
4 were made using the R project for statistical computing software, (version 3.5.3). Effect sizes included in  
5  
6 violin plots were calculated using a Hedge's *g* with correction for small sample sizes [11].  
7

8  
9 Network analyses: The protein-protein interaction network was analyzed with Cytoscape software  
10  
11 (version 3.3.0). The network interaction was simplified to examine only interaction between POR and  
12  
13 CD166 biomarkers. Interaction with both biomarker with ciliary genes was also analyzed. Types of  
14  
15 interactions (direct, physical, association and colocalization) were all described in the network. All ciliary  
16  
17 genes that interacted with vesicle biomarkers were distinctively highlighted, according to their ciliary sub-  
18  
19 compartment localization.  
20  
21  
22  
23  
24  
25

## 26 **Statistical analyses**

27  
28 All quantifiable data are reported as the mean±standard error of the mean. The homogeneity of variance  
29  
30 (homoscedasticity) was verified within each data set. Statistical analysis was performed using ANOVA  
31  
32 (analysis of variance) followed by a Bonferroni post hoc test. Power analysis was determined from the  
33  
34 coefficient variant. Most of our statistical analyses were performed with GraphPad Prism software  
35  
36 (version 7.0). The probability levels *P* values, represent the significant differences, is indicated in each  
37  
38 calculated graph. Numbers of experimental replicates and sample sizes are indicated in the figure legends.  
39  
40  
41  
42  
43  
44  
45  
46  
47  
48  
49  
50  
51  
52  
53  
54  
55  
56  
57  
58  
59  
60  
61  
62  
63  
64  
65



## Supplemental References

1. Mohieldin, A.M., Haymour, H.S., Lo, S.T., AbouAlaiwi, W.A., Atkinson, K.F., Ward, C.J., Gao, M., Wessely, O., and Nauli, S.M. (2015). Protein composition and movements of membrane swellings associated with primary cilia. *Cellular and molecular life sciences : CMLS* *72*, 2415-2429.
2. Sherpa, R.T., Pala, R., Mohieldin, A.M., and Nauli, S.M. (2019). Measurement of cytoplasmic and cilioplasmic calcium in a single living cell. *Methods Cell Biol* *153*, 25-42.
3. Jin, X., Mohieldin, A.M., Muntean, B.S., Green, J.A., Shah, J.V., Mykytyn, K., and Nauli, S.M. (2014). Cilioplasm is a cellular compartment for calcium signaling in response to mechanical and chemical stimuli. *Cell Mol Life Sci* *71*, 2165-2178.
4. Motoyama, A., Xu, T., Ruse, C.I., Wohlschlegel, J.A., and Yates, J.R., 3rd (2007). Anion and cation mixed-bed ion exchange for enhanced multidimensional separations of peptides and phosphopeptides. *Analytical chemistry* *79*, 3623-3634.
5. Wolters, D.A., Washburn, M.P., and Yates, J.R., 3rd (2001). An automated multidimensional protein identification technology for shotgun proteomics. *Analytical chemistry* *73*, 5683-5690.
6. McDonald, W.H., Tabb, D.L., Sadygov, R.G., MacCoss, M.J., Venable, J., Graumann, J., Johnson, J.R., Cociorva, D., and Yates, J.R., 3rd (2004). MS1, MS2, and SQT-three unified, compact, and easily parsed file formats for the storage of shotgun proteomic spectra and identifications. *Rapid communications in mass spectrometry : RCM* *18*, 2162-2168.
7. Xu, T., Park, S.K., Venable, J.D., Wohlschlegel, J.A., Diedrich, J.K., Cociorva, D., Lu, B., Liao, L., Hewel, J., Han, X., et al. (2015). ProLuCID: An improved SEQUEST-like algorithm with enhanced sensitivity and specificity. *Journal of proteomics* *129*, 16-24.
8. Robinson, P.N., Wollstein, A., Bohme, U., and Beattie, B. (2004). Ontologizing gene-expression microarray data: characterizing clusters with Gene Ontology. *Bioinformatics* *20*, 979-981.
9. Mi, H., Muruganujan, A., Huang, X., Ebert, D., Mills, C., Guo, X., and Thomas, P.D. (2019). Protocol Update for large-scale genome and gene function analysis with the PANTHER classification system (v.14.0). *Nature protocols* *14*, 703-721.
10. Thomas, P.D., Campbell, M.J., Kejariwal, A., Mi, H., Karlak, B., Daverman, R., Diemer, K., Muruganujan, A., and Narechania, A. (2003). PANTHER: a library of protein families and subfamilies indexed by function. *Genome research* *13*, 2129-2141.
11. Durlak, J.A. (2009). How to select, calculate, and interpret effect sizes. *Journal of pediatric psychology* *34*, 917-928.

Table S1. Analysis of protein compositions from isolated WT and KO cell-derived vesicles has revealed 3,444 protein fractions.

| Accession                | Spectral count for ciliated EV (WT) |         |         |         | Spectral count for non-ciliated EV (KO) |         |         |         | Description                                                                                                                                |
|--------------------------|-------------------------------------|---------|---------|---------|-----------------------------------------|---------|---------|---------|--------------------------------------------------------------------------------------------------------------------------------------------|
|                          | I-test p-value                      | Sample1 | Sample2 | Sample3 | Sample1                                 | Sample2 | Sample3 | Sample4 |                                                                                                                                            |
| P16125                   | 0.003457809                         | 0       | 0       | 0       | 11                                      | 13      | 12      | 13      | L-lactate dehydrogenase B chain OS-Mus musculus GN=Ldhb PE=1 SV=2                                                                          |
| P35441                   | 0.00699971                          | 0       | 0       | 0       | 4                                       | 7       | 4       | 6       | Thrombospondin-1 OS-Mus musculus GN=Thbs1 PE=1 SV=1                                                                                        |
| G6QQT1                   | 0.011732945                         | 0       | 0       | 0       | 4                                       | 8       | 4       | 6       | Alpha-2-macroglobulin-P OS-Mus musculus GN=Alpha2m PE=2 SV=2                                                                               |
| Q61171                   | 0.035980159                         | 7       | 2       | 8       | 0                                       | 22      | 28      | 28      | Peroxiredoxin-2 OS-Mus musculus GN=Prdx2 PE=1 SV=3                                                                                         |
| P60766                   | 0.0001039897                        | 26      | 22      | 22      | 7                                       | 82      | 63      | 48      | 57 Cell division control protein 42 homolog OS-Mus musculus GN=Cdc42 PE=1 SV=2                                                             |
| K61598                   | 0.01721951                          | 18      | 14      | 14      | 2                                       | 55      | 29      | 21      | 39 Rab GDP dissociation inhibitor beta OS-Mus musculus GN=Gdi2 PE=1 SV=1                                                                   |
| P26041                   | 0.005194877                         | 111     | 85      | 83      | 28                                      | 266     | 206     | 188     | 192 Moesin OS-Mus musculus GN=Msn PE=1 SV=3                                                                                                |
| Q101853                  | 0.034474749                         | 45      | 26      | 44      | 11                                      | 120     | 98      | 42      | 69 Transmembrane and cytoplasmic reticulum ATPase OS-Mus musculus GN=Vcp PE=1 SV=4                                                         |
| P10107                   | 0.000412006                         | 90      | 73      | 70      | 26                                      | 229     | 152     | 129     | 205 Annexin A1 OS-Mus musculus GN=Anxa1 PE=1 SV=2                                                                                          |
| Q07797                   | 0.02567394                          | 14      | 15      | 14      | 0                                       | 42      | 38      | 17      | 37 Galectin-3-binding protein OS-Mus musculus GN=Lgals3bp PE=1 SV=1                                                                        |
| FWNT72                   | 0.003200513                         | 132     | 80      | 104     | 32                                      | 219     | 180     | 123     | 210 Annexin OS-Mus musculus GN=Anxa6 PE=1 SV=1                                                                                             |
| P15760                   | 0.003724147                         | 67      | 60      | 60      | 17                                      | 134     | 117     | 86      | 108 Cofilin-1 OS-Mus musculus GN=Cfl1 PE=1 SV=1                                                                                            |
| AA01B0GSX0               | 0.043669846                         | 28      | 20      | 20      | 14                                      | 52      | 36      | 31      | 51 L-lactate dehydrogenase OS-Mus musculus GN=Ldha PE=1 SV=1                                                                               |
| P07356                   | 0.015573479                         | 123     | 89      | 75      | 15                                      | 208     | 135     | 97      | 156 Annexin A2 OS-Mus musculus GN=Anxa2 PE=1 SV=2                                                                                          |
| P62259                   | 0.009276622                         | 34      | 34      | 35      | 14                                      | 68      | 54      | 35      | 71 14-3-3 protein epsilon OS-Mus musculus GN=Ywhae PE=1 SV=1                                                                               |
| AG2144                   | 0.05287277                          | 66      | 75      | 60      | 26                                      | 133     | 113     | 84      | 106 Fructose-bisphosphate aldolase OS-Mus musculus GN=Aldoa PE=1 SV=1                                                                      |
| P57780                   | 0.043192861                         | 46      | 42      | 41      | 7                                       | 76      | 53      | 40      | 66 Alpha-actinin-4 OS-Mus musculus GN=Actn4 PE=1 SV=1                                                                                      |
| P62962                   | 0.018547269                         | 53      | 57      | 56      | 18                                      | 73      | 104     | 70      | 89 Profilin-1 OS-Mus musculus GN=Pfn1 PE=1 SV=2                                                                                            |
| P48036                   | 0.012725186                         | 73      | 41      | 42      | 16                                      | 95      | 67      | 59      | 84 Annexin A5 OS-Mus musculus GN=Anxa5 PE=1 SV=1                                                                                           |
| P17742                   | 0.053917159                         | 52      | 27      | 25      | 0                                       | 77      | 59      | 30      | 62 Peptidyl-prolyl cis-trans isomerase A OS-Mus musculus GN=Ppia PE=1 SV=2                                                                 |
| Q8VDD5                   | 0.033802598                         | 272     | 183     | 227     | 85                                      | 409     | 303     | 230     | 305 Myosin-9 OS-Mus musculus GN=Myp9 PE=1 SV=4                                                                                             |
| Q9WU78                   | 0.041529698                         | 88      | 65      | 57      | 17                                      | 107     | 83      | 68      | 95 Programmed cell death 6-interacting protein OS-Mus musculus GN=Pdcfdip PE=1 SV=3                                                        |
| P70168                   | 0.01050399                          | 51      | 38      | 49      | 14                                      | 63      | 52      | 40      | 58 Importin subunit beta-1 OS-Mus musculus GN=Kpnb1 PE=1 SV=2                                                                              |
| G6R0H7                   | 0.042889642                         | 30      | 19      | 25      | 7                                       | 20      | 17      | 10      | 21 Guanine nucleotide-binding protein (G <i>o</i> ) subunit alpha isoforms XLas OS-Mus musculus GN=Gnas PE=1 SV=1                          |
| G6PFC1                   | 0.00964254                          | 147     | 127     | 136     | 33                                      | 108     | 84      | 64      | 90 CD3 antigen OS-Mus musculus GN=Ct3 PE=1 SV=1                                                                                            |
| P80318                   | 0.039641284                         | 161     | 123     | 144     | 68                                      | 99      | 88      | 82      | 103 T-complex protein 1 subunit gamma OS-Mus musculus GN=Cct3 PE=1 SV=1                                                                    |
| P63101                   | 0.019829529                         | 78      | 75      | 78      | 35                                      | 54      | 31      | 42      | 70 14-3-3 protein zeta/delta OS-Mus musculus GN=Ywhaz PE=1 SV=1                                                                            |
| Q55XR6                   | 0.003343502                         | 414     | 294     | 302     | 96                                      | 189     | 174     | 129     | 202 Clathrin heavy chain OS-Mus musculus GN=Ctce PE=1 SV=1                                                                                 |
| P40142                   | 0.006584647                         | 63      | 52      | 60      | 16                                      | 28      | 19      | 17      | 28 Tyrosinase OS-Mus musculus GN=Tk PE=1 SV=1                                                                                              |
| Q9QCV8                   | 0.006230055                         | 73      | 54      | 58      | 34                                      | 29      | 21      | 24      | 58 14-3-3 protein beta/alpha OS-Mus musculus GN=Ywhab PE=1 SV=3                                                                            |
| F0YF69                   | 0.003182217                         | 89      | 81      | 76      | 40                                      | 23      | 26      | 29      | 67 14-3-3 protein theta (Fragment) OS-Mus musculus GN=Ywhag PE=1 SV=1                                                                      |
| P80314                   | 0.001582106                         | 217     | 145     | 230     | 79                                      | 76      | 70      | 68      | 120 T-complex protein 1 subunit beta OS-Mus musculus GN=Cct2 PE=1 SV=4                                                                     |
| P82874                   | 0.007099114                         | 108     | 89      | 91      | 37                                      | 36      | 40      | 37      | 46 Guanine nucleotide-binding protein (G <i>o</i> ) subunit beta-1 OS-Mus musculus GN=Gnb1 PE=1 SV=3                                       |
| Q61739                   | 0.001395553                         | 36      | 26      | 26      | 9                                       | 6       | 6       | 3       | 5 Integrin alpha-6 OS-Mus musculus GN=Itga6 PE=1 SV=3                                                                                      |
| G62351                   | 0.000290724                         | 106     | 72      | 82      | 24                                      | 5       | 5       | 4       | 10 Transferrin receptor protein 1 OS-Mus musculus GN=Tfrc PE=1 SV=1                                                                        |
| P62821                   | 0.07497188                          | 0       | 0       | 0       | 2                                       | 3       | 0       | 0       | 3 Ras-related protein Rab-1A OS-Mus musculus GN=Rab1A PE=1 SV=3                                                                            |
| Q80917                   | 0.180284287                         | 0       | 0       | 0       | 5                                       | 0       | 0       | 0       | 65 Filamin-1 OS-Mus musculus GN=Fln1 PE=1 SV=3                                                                                             |
| H8BK60                   | 0.391002219                         | 0       | 0       | 0       | 0                                       | 0       | 0       | 0       | 4 Cavolin-1 OS-Mus musculus GN=Cav1 PE=1 SV=1                                                                                              |
| B7EAV1                   | 0.00445195                          | 99      | 73      | 99      | 20                                      | 303     | 195     | 138     | 211 Filamin, alpha (Fragment) OS-Mus musculus GN=Flna PE=1 SV=1                                                                            |
| D32318                   | 0.3623249                           | 225     | 178     | 220     | 75                                      | 367     | 0       | 0       | 244 Elongation factor 1-alpha 1 (Fragment) OS-Mus musculus GN=Elf1a1 PE=1 SV=1                                                             |
| P84078                   | 0.066806698                         | 20      | 12      | 14      | 4                                       | 22      | 18      | 13      | 25 ADP-ribosylation factor 1 OS-Mus musculus GN=Arf1 PE=1 SV=2                                                                             |
| Q7TT50                   | 0.123946822                         | 6       | 3       | 0       | 0                                       | 6       | 6       | 8       | 11 Serine/threonine-protein kinase MRCK beta OS-Mus musculus GN=Cdc42bpb PE=1 SV=2                                                         |
| P63001                   | 0.102102581                         | 49      | 28      | 42      | 10                                      | 47      | 53      | 58      | 60 Ras-related C3 botulinum toxin substrate 1 OS-Mus musculus GN=Rac1 PE=1 SV=1                                                            |
| P35700                   | 0.190724786                         | 53      | 33      | 51      | 7                                       | 96      | 50      | 31      | 60 Peroxiredoxin-1 OS-Mus musculus GN=Prdx1 PE=1 SV=1                                                                                      |
| Q80892                   | 0.172667576                         | 17      | 14      | 14      | 4                                       | 24      | 16      | 12      | 28 Systemin-1 OS-Mus musculus GN=Scdhp PE=1 SV=1                                                                                           |
| Q9W991                   | 0.079384173                         | 34      | 29      | 29      | 9                                       | 38      | 30      | 43      | 47 Prostaglandin G/H synthase 2 receptor negative regulator OS-Mus musculus GN=Pgfrn PE=1 SV=2                                             |
| P52480                   | 0.267546327                         | 301     | 216     | 239     | 80                                      | 488     | 246     | 166     | 352 Pyruvate kinase PKM OS-Mus musculus GN=Pkm PE=1 SV=1                                                                                   |
| P10852                   | 0.302064676                         | 35      | 26      | 19      | 4                                       | 33      | 27      | 25      | 38 4F2 cell-surface antigen heavy chain OS-Mus musculus GN=Slc3a2 PE=1 SV=1                                                                |
| P49111                   | 0.124382189                         | 184     | 141     | 179     | 76                                      | 210     | 223     | 191     | 223 Phosphoglycerate kinase 1 OS-Mus musculus GN=Pgk1 PE=1 SV=4                                                                            |
| P41731                   | 0.121361253                         | 0       | 0       | 0       | 0                                       | 0       | 0       | 0       | 40 CD3 antigen OS-Mus musculus GN=Ct3 PE=1 SV=1                                                                                            |
| Q02053                   | 0.120499625                         | 100     | 86      | 102     | 22                                      | 169     | 118     | 72      | 116 Ubiquitin-like modifier-activating enzyme 1 OS-Mus musculus GN=Ubal PE=1 SV=1                                                          |
| AA0140LJL0               | 0.171034625                         | 9       | 7       | 7       | 0                                       | 12      | 8       | 5       | 13 CD81 antigen (Fragment) OS-Mus musculus GN=Cd81 PE=1 SV=1                                                                               |
| Q01279                   | 0.127624755                         | 3       | 4       | 0       | 0                                       | 4       | 5       | 5       | 6 Epidermal growth factor receptor OS-Mus musculus GN=Egfr PE=1 SV=1                                                                       |
| P62806                   | 0.226080574                         | 288     | 226     | 234     | 72                                      | 327     | 315     | 284     | 232 Histone H4 OS-Mus musculus GN=H4lta PE=1 SV=2                                                                                          |
| Q9V916                   | 0.146372189                         | 21      | 14      | 16      | 5                                       | 23      | 20      | 18      | 18 Ras-related protein Rap-1b OS-Mus musculus GN=Rap1b PE=1 SV=2                                                                           |
| Q3V117                   | 0.603663424                         | 77      | 46      | 67      | 26                                      | 112     | 66      | 40      | 85 ATP-citrate synthase OS-Mus musculus GN=Acy PE=1 SV=1                                                                                   |
| AA0406YXF6               | 0.579607824                         | 86      | 71      | 58      | 21                                      | 52      | 67      | 83      | 119 Transforming protein RhoA (Fragment) OS-Mus musculus GN=Rhoa PE=1 SV=1                                                                 |
| Q9D091                   | 0.140626988                         | 10      | 4       | 0       | 0                                       | 10      | 7       | 10      | 11 GTase OS-Mus musculus GN=GTase PE=1 SV=1                                                                                                |
| P61696                   | 0.199114225                         | 87      | 76      | 81      | 39                                      | 0       | 0       | 95      | 0 Heat shock 70 kDa protein 1A OS-Mus musculus GN=Hspa1A PE=1 SV=2                                                                         |
| P07724                   | 0.785465479                         | 0       | 4       | 13      | 7                                       | 8       | 11      | 11      | 11 Serum albumin OS-Mus musculus GN=Alb PE=1 SV=3                                                                                          |
| P54116                   | 0.081652695                         | 3       | 9       | 10      | 2                                       | 5       | 11      | 8       | 7 Erythrocyte band 7 integral membrane protein OS-Mus musculus GN=Stom PE=1 SV=3                                                           |
| Q10212                   | 0.520034416                         | 473     | 343     | 250     | 95                                      | 543     | 327     | 268     | 465 Actin, cytoplasmic 1 OS-Mus musculus GN=Actn1 PE=1 SV=1                                                                                |
| P97429                   | 0.47432758                          | 68      | 43      | 52      | 14                                      | 76      | 42      | 43      | 57 Annexin A4 OS-Mus musculus GN=Anxa4 PE=1 SV=4                                                                                           |
| E9Q3X0                   | 0.735196524                         | 13      | 9       | 15      | 2                                       | 8       | 15      | 8       | 17 Major vault protein OS-Mus musculus GN=Mvp PE=1 SV=1                                                                                    |
| P26040                   | 0.599019696                         | 70      | 61      | 65      | 18                                      | 63      | 68      | 64      | 66 Ezrin OS-Mus musculus GN=Ezr PE=1 SV=3                                                                                                  |
| AA0101RNI1               | 0.832870111                         | 363     | 303     | 249     | 315                                     | 246     | 178     | 118     | 240 Fatty acid synthase OS-Mus musculus GN=Fasn PE=1 SV=1                                                                                  |
| P63017                   | 0.504313118                         | 348     | 311     | 313     | 148                                     | 418     | 338     | 237     | 324 Heat shock cognate 71 kDa protein OS-Mus musculus GN=Hspa8 PE=1 SV=1                                                                   |
| AA0A00MQF6               | 0.508713099                         | 137     | 109     | 132     | 59                                      | 182     | 134     | 74      | 112 Glyceraldehyde-3-phosphate dehydrogenase OS-Mus musculus GN=Gadph PE=1 SV=1                                                            |
| P17751                   | 0.918861635                         | 122     | 96      | 106     | 20                                      | 84      | 92      | 98      | 108 Triosephosphate isomerase OS-Mus musculus GN=Tpi1 PE=1 SV=4                                                                            |
| P21956                   | 0.315848493                         | 230     | 171     | 193     | 80                                      | 215     | 198     | 145     | 187 Lactadherin OS-Mus musculus GN=Lgdr PE=1 SV=1                                                                                          |
| P80316                   | 0.761804557                         | 129     | 77      | 99      | 22                                      | 115     | 85      | 80      | 81 T-complex protein 1 subunit epsilon OS-Mus musculus GN=Cet5 PE=1 SV=1                                                                   |
| P63260                   | 0.305366673                         | 1196    | 955     | 993     | 449                                     | 1055    | 887     | 881     | 1094 Actin, cytoplasmic 2 OS-Mus musculus GN=Actg1 PE=1 SV=1                                                                               |
| Q35598                   | 0.430451625                         | 4       | 5       | 7       | 0                                       | 8       | 7       | 3       | 5 Disintegrin and metalloproteinase domain-containing protein 10 OS-Mus musculus GN=Adam10 PE=1 SV=2                                       |
| P08752                   | 0.420378363                         | 56      | 39      | 40      | 11                                      | 52      | 33      | 25      | 47 Guanine nucleotide-binding protein (G <i>o</i> ) subunit alpha-2 OS-Mus musculus GN=Gnaq2 PE=1 SV=5                                     |
| Q9J705                   | 0.263271001                         | 47      | 32      | 37      | 8                                       | 40      | 31      | 37      | 62 Cytoskeletal protein Rab-5 OS-Mus musculus GN=Rab5 PE=1 SV=3                                                                            |
| P09055                   | 0.144682836                         | 94      | 85      | 90      | 29                                      | 89      | 73      | 71      | 78 Integrin beta-1 OS-Mus musculus GN=Itgb1 PE=1 SV=1                                                                                      |
| P63569                   | 0.458594742                         | 223     | 150     | 153     | 34                                      | 188     | 143     | 77      | 165 Tubulin alpha-1 chain OS-Mus musculus GN=Tuba1A PE=1 SV=1                                                                              |
| P05213                   | 0.460832697                         | 225     | 151     | 152     | 34                                      | 190     | 143     | 76      | 166 Tubulin alpha-1B chain OS-Mus musculus GN=Tuba1B PE=1 SV=2                                                                             |
| P210293                  | 0.37501981                          | 34      | 20      | 29      | 8                                       | 31      | 28      | 31      | 23 Rab18a cytoskeletal protein OS-Mus musculus GN=Hspa8 PE=1 SV=3                                                                          |
| P68373                   | 0.393710732                         | 220     | 149     | 149     | 34                                      | 186     | 135     | 77      | 160 Tubulin alpha-1C chain OS-Mus musculus GN=Tuba1C PE=1 SV=1                                                                             |
| D3Z1M1                   | 0.70254034                          | 59      | 43      | 49      | 9                                       | 35      | 38      | 36      | 52 Guanine nucleotide-binding protein (G <i>12</i> /G <i>13</i> /G <i>17</i> ) subunit beta-2 (Fragment) OS-Mus musculus GN=Gnb2 PE=1 SV=1 |
| P68510                   | 0.230994514                         | 22      | 18      | 26      | 14                                      | 16      | 18      | 20      | 24 14-3-3 protein eta OS-Mus musculus GN=Ywhae PE=1 SV=2                                                                                   |
| G61187                   | 0.604299512                         | 0       | 4       | 0       | 0                                       | 0       | 0       | 0       | 4 Tumor necrosis factor 101 protein OS-Mus musculus GN=Tg101 PE=1 SV=2                                                                     |
| E9Q0C3                   | 0.1010874                           | 94      | 93      | 104     | 43                                      | 98      | 82      | 59      | 88 Heat shock protein HSP 90-beta (Fragment) OS-Mus musculus GN=Hsp90ab1 PE=1 SV=1                                                         |
| P07901                   | 0.088575903                         | 233     | 174     | 225     | 50                                      | 194     | 159     | 124     | 177 Heat shock protein HSP 90-alpha OS-Mus musculus GN=Hsp90a PE=1 SV=4                                                                    |
| J30P71                   | 0.341094844                         | 22      | 20      | 17      | 5                                       | 12      | 17      | 15      | 17 Basigin (Fragment) OS-Mus musculus GN=Bsg PE=1 SV=1                                                                                     |
| F22483                   | 0.273409548                         | 30      | 17      | 17      | 7                                       | 13      | 20      | 13      | 19 T-complex protein 1 subunit alpha OS-Mus musculus GN=Ctp1 PE=1 SV=1                                                                     |
| Q9EPQ2                   | 0.623047595                         | 30      | 13      | 18      | 2                                       | 18      | 10      | 8       | 20 EH domain-containing protein 4 OS-Mus musculus GN=Ehd4 PE=1 SV=1                                                                        |
| P17047                   | 0.72245146                          | 7       | 0       | 4       | 0                                       | 7       | 5       | 0       | 5 Lysosome-associated membrane glycoprotein 2 OS-Mus musculus GN=Lamp2 PE=1 SV=2                                                           |
| Q8VDN2                   | 0.114091839                         | 125     | 108     | 113     | 23                                      | 98      | 74      | 50      | 88 Sodium/potassium-transporting ATPase subunit alpha-1 OS-Mus musculus GN=Atp1a1 PE=1 SV=1                                                |
| P55238                   | 0.263496862                         | 7       | 0       | 0       | 4                                       | 5       | 7       | 5       | 7 Ras-Mus musculus GN=Ras PE=1 SV=1                                                                                                        |
| P51150                   | 0.941689858                         | 32      | 19      | 18      | 0                                       | 16      | 14      | 10      | 26 Ras-related protein Rab-7a OS-Mus musculus GN=Rab7a PE=1 SV=2                                                                           |
| Q91V41                   | 0.791702711                         | 16      | 11      | 9       | 0                                       | 11      | 9       | 5       | 8 Ras-related protein Rab-14 OS-Mus musculus GN=Rab14 PE=1 SV=3                                                                            |
| P53986                   | 0.107204019                         | 13      | 12      | 16      | 10                                      | 8       | 7       | 8       | 6 Monocarboxylate transporter 1 OS-Mus musculus GN=Slc6a1 PE=1 SV=1                                                                        |
| P53278                   | 0.400685858                         | 46      | 8       | 8       | 0                                       | 29      | 24      | 17      | 23 Ras-related protein Rab-5C OS-Mus musculus GN=Rab5c PE=1 SV=2                                                                           |
| Q9OZ72                   | 0.103596017                         | 13      | 15      | 11      | 0                                       | 3       | 3       | 0       | 2 Glypican-1 OS-Mus musculus GN=Gpc1 PE=1 SV=1                                                                                             |
| AA0A01RQ49               | 0.065348584                         | 5       | 4       | 3       | 0                                       | 0       | 0       | 0       | 0 Hsp70-binding protein 1 (Fragment) OS-Mus musculus GN=Hspbp1 PE=1 SV=1                                                                   |
| P40240                   | 0.207614406                         | 4       | 4       | 0       | 0                                       | 6       | 0       | 0       | 0 CD9 antigen OS-Mus musculus GN=Cd9 PE=1 SV=2                                                                                             |
| Rev1885_P58252:EF2_MOUSE | 0.391002219                         | 0       | 0       |         |                                         |         |         |         |                                                                                                                                            |

|             |             |   |   |   |   |     |    |    |                                                                                                                                                     |
|-------------|-------------|---|---|---|---|-----|----|----|-----------------------------------------------------------------------------------------------------------------------------------------------------|
| P48428      | 0.004524911 | 0 | 0 | 0 | 0 | 11  | 5  | 5  | 6 Tubulin-specific chaperone A OS=Mus musculus GN=Tbca PE=1 SV=3                                                                                    |
| E9Q2A0      | 0.004609696 | 0 | 0 | 0 | 0 | 8   | 7  | 5  | 4 EGF-containing fibulin-like extracellular matrix protein 2 (Fragment) OS=Mus musculus GN=Efemp2 PE=1 SV=1                                         |
| O9P4A1      | 0.005109234 | 0 | 0 | 0 | 0 | 26  | 12 | 16 | 21 EMLIN2 OS=Mus musculus GN=Emln2 PE=1 SV=1                                                                                                        |
| E9PWQ3      | 0.005148804 | 0 | 0 | 0 | 0 | 29  | 22 | 11 | 15 Protein Col6a3 OS=Mus musculus GN=Col6a3 PE=1 SV=2                                                                                               |
| O70433      | 0.005361581 | 0 | 0 | 0 | 0 | 5   | 7  | 5  | 9 Four and a half LIM domains protein 2 OS=Mus musculus GN=Fhl2 PE=1 SV=1                                                                           |
| E9PYB0      | 0.005637731 | 0 | 0 | 0 | 0 | 7   | 4  | 6  | 6 Protein Ahnak2 (Fragment) OS=Mus musculus GN=Ahnak2 PE=1 SV=8                                                                                     |
| O9WV39      | 0.005876575 | 0 | 0 | 0 | 0 | 12  | 10 | 5  | 6 EGF-containing fibulin-like extracellular matrix protein 2 OS=Mus musculus GN=Efemp2 PE=1 SV=1                                                    |
| GEERD6      | 0.005876575 | 0 | 0 | 0 | 0 | 12  | 10 | 5  | 6 EGF-containing fibulin-like extracellular matrix protein 2 OS=Mus musculus GN=Efemp2 PE=1 SV=1                                                    |
| P10493      | 0.005996932 | 0 | 0 | 0 | 0 | 126 | 87 | 36 | 89 Nidogen-1 OS=Mus musculus GN=Nid1 PE=1 SV=2                                                                                                      |
| O9JUH8      | 0.006089453 | 0 | 0 | 0 | 0 | 8   | 8  | 9  | 8 SH3 domain-binding glutamic acid-rich-like protein OS=Mus musculus GN=Sh3glrp PE=1 SV=1                                                           |
| Q6Q209      | 0.006312549 | 0 | 0 | 0 | 0 | 11  | 9  | 5  | 5 Versican core protein OS=Mus musculus GN=Vcan PE=1 SV=2                                                                                           |
| Q6J0H1      | 0.006333512 | 0 | 0 | 0 | 0 | 5   | 2  | 2  | 3 Hsp90 co-chaperone Cdc37 OS=Mus musculus GN=Cdc37 PE=1 SV=1                                                                                       |
| O08603      | 0.006606666 | 0 | 0 | 0 | 0 | 8   | 7  | 6  | 4 Retinoic acid early-inducible protein 1-beta OS=Mus musculus GN=Ract1b PE=1 SV=1                                                                  |
| P53966      | 0.006827793 | 0 | 0 | 0 | 0 | 22  | 13 | 12 | 9 Cellular nucleic acid-binding protein OS=Mus musculus GN=Cnbp PE=1 SV=2                                                                           |
| Q08066      | 0.006963962 | 0 | 0 | 0 | 0 | 3   | 4  | 4  | 5 Phosphotriesterase-related protein OS=Mus musculus GN=Pter PE=1 SV=1                                                                              |
| A2AUR3      | 0.006963962 | 0 | 0 | 0 | 0 | 3   | 4  | 4  | 5 Phosphotriesterase-related protein (Fragment) OS=Mus musculus GN=Pter PE=1 SV=2                                                                   |
| O80YQ1      | 0.00699771  | 0 | 0 | 0 | 0 | 4   | 7  | 4  | 6 Thrombospondin 1 OS=Mus musculus GN=Tbsp1 PE=1 SV=1                                                                                               |
| D3YTP0      | 0.007130451 | 0 | 0 | 0 | 0 | 5   | 7  | 4  | 9 Metalloreticulin STEAP3 (Fragment) OS=Mus musculus GN=Steap3 PE=1 SV=8                                                                            |
| E9QNS2      | 0.007130451 | 0 | 0 | 0 | 0 | 5   | 7  | 4  | 9 Metalloreticulin STEAP3 OS=Mus musculus GN=Steap3 PE=1 SV=1                                                                                       |
| Q8K159      | 0.007130451 | 0 | 0 | 0 | 0 | 5   | 7  | 4  | 9 Metalloreticulin STEAP3 OS=Mus musculus GN=Steap3 PE=1 SV=1                                                                                       |
| QA0AR4J1G9  | 0.007130451 | 0 | 0 | 0 | 0 | 5   | 7  | 4  | 9 Metalloreticulin STEAP3 OS=Mus musculus GN=Steap3 PE=1 SV=1                                                                                       |
| O9CWS0      | 0.007276445 | 0 | 0 | 0 | 0 | 5   | 3  | 4  | 3 N(G),N(G)-dimethylarginine dimethylaminohydrolase 1 OS=Mus musculus GN=Ddah1 PE=1 SV=3                                                            |
| Q64314      | 0.007325832 | 0 | 0 | 0 | 0 | 8   | 10 | 5  | 13 Hematopoietic progenitor cell antigen CD34 OS=Mus musculus GN=CD34 PE=1 SV=1                                                                     |
| P01023      | 0.007520237 | 0 | 0 | 0 | 0 | 12  | 17 | 11 | 10 Complement C3 OS=Mus musculus GN=C3 PE=1 SV=3                                                                                                    |
| Q3U687      | 0.007620967 | 0 | 0 | 0 | 0 | 5   | 8  | 6  | 6 Protein Ifrlb2 OS=Mus musculus GN=Ifrlb2 PE=1 SV=1                                                                                                |
| P70290      | 0.009163409 | 0 | 0 | 0 | 0 | 13  | 18 | 7  | 12 55 kDa erythrocyte membrane protein OS=Mus musculus GN=Mpp1 PE=1 SV=1                                                                            |
| A2ANR4      | 0.009163409 | 0 | 0 | 0 | 0 | 13  | 18 | 7  | 12 55 kDa erythrocyte membrane protein OS=Mus musculus GN=Mpp1 PE=1 SV=1                                                                            |
| Q93550      | 0.009223329 | 0 | 0 | 0 | 0 | 7   | 12 | 6  | 6 Thrombospondin-2 OS=Mus musculus GN=Tbsp2 PE=1 SV=2                                                                                               |
| Q64449      | 0.009564109 | 0 | 0 | 0 | 0 | 7   | 9  | 5  | 13 C-type mannose receptor 2 OS=Mus musculus GN=Mrc2 PE=1 SV=3                                                                                      |
| P14428      | 0.009610074 | 0 | 0 | 0 | 0 | 6   | 5  | 4  | 10 H-2 class I histocompatibility antigen, K-Q alpha chain (Fragment) OS=Mus musculus GN=H2-K1 PE=1 SV=1                                            |
| G3LUX12     | 0.010593758 | 0 | 0 | 0 | 0 | 3   | 3  | 4  | 5 Casein kinase II subunit beta (Fragment) OS=Mus musculus GN=Cank2b PE=1 SV=2                                                                      |
| P61622      | 0.010593758 | 0 | 0 | 0 | 0 | 3   | 3  | 4  | 5 Integrin alpha-11 OS=Mus musculus GN=Iga11 PE=1 SV=1                                                                                              |
| QA0AB4J1F0  | 0.010593758 | 0 | 0 | 0 | 0 | 3   | 3  | 4  | 5 Integrin alpha-11 OS=Mus musculus GN=Iga11 PE=1 SV=1                                                                                              |
| Q8K2A1      | 0.010609968 | 0 | 0 | 0 | 0 | 6   | 4  | 3  | 2 PTB domain-containing engulfment adapter protein 1 OS=Mus musculus GN=Gulp1 PE=1 SV=1                                                             |
| E0CXCS      | 0.010609968 | 0 | 0 | 0 | 0 | 6   | 4  | 3  | 2 PTB domain-containing engulfment adapter protein 1 OS=Mus musculus GN=Gulp1 PE=1 SV=1                                                             |
| O3S646      | 0.01093572  | 0 | 0 | 0 | 0 | 3   | 3  | 6  | 7 Calpain-1 OS=Mus musculus GN=Capn1 PE=1 SV=2                                                                                                      |
| Q9DF09      | 0.011234897 | 0 | 0 | 0 | 0 | 8   | 6  | 5  | 13 Phosphoglucomutase-1 OS=Mus musculus GN=Pgm1 PE=1 SV=4                                                                                           |
| E9QN12      | 0.011495961 | 0 | 0 | 0 | 0 | 8   | 3  | 6  | 6 Platelet-derived growth factor receptor beta OS=Mus musculus GN=Pdgfrb PE=1 SV=1                                                                  |
| P05622      | 0.011495961 | 0 | 0 | 0 | 0 | 8   | 3  | 6  | 6 Platelet-derived growth factor receptor beta OS=Mus musculus GN=Pdgfrb PE=1 SV=1                                                                  |
| E9QPE2      | 0.011495961 | 0 | 0 | 0 | 0 | 8   | 3  | 6  | 6 Platelet-derived growth factor receptor beta OS=Mus musculus GN=Pdgfrb PE=1 SV=1                                                                  |
| R2RUB8      | 0.011944388 | 0 | 0 | 0 | 0 | 3   | 5  | 5  | 5 Map4-related protein OS=Mus musculus GN=Map4k4 PE=1 SV=1                                                                                          |
| QA0AA6YWM8  | 0.011944388 | 0 | 0 | 0 | 0 | 3   | 5  | 5  | 5 Mitogen-activated protein kinase kinase kinase kinase 4 OS=Mus musculus GN=Map4k4 PE=1 SV=1                                                       |
| P7820       | 0.011961137 | 0 | 0 | 0 | 0 | 3   | 4  | 4  | 3 Mitogen-activated protein kinase kinase kinase kinase 4 OS=Mus musculus GN=Map4k4 PE=1 SV=1                                                       |
| FTDBB3      | 0.011973526 | 0 | 0 | 0 | 0 | 7   | 4  | 7  | 6 Protein Ahnak2 (Fragment) OS=Mus musculus GN=Ahnak2 PE=1 SV=1                                                                                     |
| D2A459      | 0.013247989 | 0 | 0 | 0 | 0 | 7   | 4  | 2  | 4 Retinal dehydrating factor alpha OS=Mus musculus GN=Rdfal1 PE=1 SV=1                                                                              |
| PE2665      | 0.013542122 | 0 | 0 | 0 | 0 | 4   | 9  | 5  | 7 Cellular retinoic acid-binding protein 1 OS=Mus musculus GN=Crabp1 PE=1 SV=2                                                                      |
| P8647       | 0.013733466 | 0 | 0 | 0 | 0 | 7   | 5  | 2  | 3 Stress-70 protein, mitochondrial OS=Mus musculus GN=Hspa90 PE=1 SV=3                                                                              |
| E9PWE8      | 0.013936138 | 0 | 0 | 0 | 0 | 39  | 29 | 8  | 29 Dihydropyrimidinase-related protein 3 OS=Mus musculus GN=Dpyd3 PE=1 SV=1                                                                         |
| Q9J2M1      | 0.014806485 | 0 | 0 | 0 | 0 | 8   | 10 | 5  | 4 Protein Nexn-2 OS=Mus musculus GN=Nxn2 PE=1 SV=1                                                                                                  |
| P11087      | 0.015241163 | 0 | 0 | 0 | 0 | 43  | 36 | 13 | 19 Collagen alpha-1(I) chain OS=Mus musculus GN=Col1a1 PE=1 SV=4                                                                                    |
| Q08093      | 0.015427758 | 0 | 0 | 0 | 0 | 7   | 5  | 6  | 3 Calponin-2 OS=Mus musculus GN=Cnn2 PE=1 SV=1                                                                                                      |
| Q62188      | 0.017362145 | 0 | 0 | 0 | 0 | 39  | 29 | 7  | 29 Dihydropyrimidinase-related protein 3 OS=Mus musculus GN=Dpyd3 PE=1 SV=1                                                                         |
| Q9P851      | 0.018263529 | 0 | 0 | 0 | 0 | 3   | 7  | 6  | 6 Platin-3 OS=Mus musculus GN=Plk3 PE=1 SV=2                                                                                                        |
| BIAX58      | 0.018263529 | 0 | 0 | 0 | 0 | 3   | 7  | 6  | 6 Platin-3 OS=Mus musculus GN=Plk3 PE=1 SV=1                                                                                                        |
| QA0A1C7CVV0 | 0.018263529 | 0 | 0 | 0 | 0 | 3   | 7  | 6  | 6 Platin-3 (Fragment) OS=Mus musculus GN=Plk3 PE=1 SV=1                                                                                             |
| D2ZD75      | 0.018535993 | 0 | 0 | 0 | 0 | 8   | 5  | 2  | 3 Collagen alpha-2(V) chain OS=Mus musculus GN=Col6a2 PE=1 SV=1                                                                                     |
| Q8K8U0      | 0.021148077 | 0 | 0 | 0 | 0 | 22  | 10 | 5  | 14 Lpin1 OS=Mus musculus GN=Lpin1 PE=1 SV=3                                                                                                         |
| QA0AG2JGZ5  | 0.021633448 | 0 | 0 | 0 | 0 | 12  | 6  | 2  | 8 PDZ and LIM domain protein 5 (Fragment) OS=Mus musculus GN=Pdlim5 PE=1 SV=1                                                                       |
| Q8BH35      | 0.024283172 | 0 | 0 | 0 | 0 | 4   | 5  | 7  | 5 Complement component C8 beta chain OS=Mus musculus GN=C8b PE=1 SV=1                                                                               |
| D9JZ29      | 0.026008571 | 0 | 0 | 0 | 0 | 13  | 6  | 2  | 8 ENH1 isoform 1b OS=Mus musculus GN=Pdlim5 PE=1 SV=1                                                                                               |
| Q8K151      | 0.026008571 | 0 | 0 | 0 | 0 | 13  | 6  | 2  | 8 PDZ and LIM domain protein 5 OS=Mus musculus GN=Pdlim5 PE=1 SV=4                                                                                  |
| D9J301      | 0.026008571 | 0 | 0 | 0 | 0 | 13  | 6  | 2  | 8 ENH1 isoform 1d OS=Mus musculus GN=Pdlim5 PE=1 SV=1                                                                                               |
| D9J300      | 0.026008571 | 0 | 0 | 0 | 0 | 13  | 6  | 2  | 8 ENH1 isoform 1c OS=Mus musculus GN=Pdlim5 PE=1 SV=1                                                                                               |
| D9J302      | 0.026008571 | 0 | 0 | 0 | 0 | 13  | 6  | 2  | 8 ENH1 isoform 1e OS=Mus musculus GN=Pdlim5 PE=1 SV=1                                                                                               |
| E9J3M3      | 0.026400484 | 0 | 0 | 0 | 0 | 5   | 12 | 4  | 9 Protein transport protein Sec23A OS=Mus musculus GN=Sec23a PE=1 SV=1                                                                              |
| Q01405      | 0.026400484 | 0 | 0 | 0 | 0 | 5   | 12 | 4  | 9 Protein transport protein Sec23A OS=Mus musculus GN=Sec23a PE=1 SV=2                                                                              |
| P01942      | 0.028797929 | 0 | 0 | 0 | 0 | 3   | 8  | 4  | 4 Hemoglobin subunit alpha OS=Mus musculus GN=Hba PE=1 SV=2                                                                                         |
| O91VB8      | 0.028797929 | 0 | 0 | 0 | 0 | 3   | 8  | 4  | 4 Alpha globin 1 OS=Mus musculus GN=Hemoglobin alpha 2 PE=1 SV=1                                                                                    |
| Q61205      | 0.032542586 | 0 | 0 | 0 | 0 | 2   | 7  | 4  | 4 Platelet-activating factor acetylhydrolase IB subunit gamma OS=Mus musculus GN=Pafah1b3 PE=1 SV=1                                                 |
| D2AZT6      | 0.032542586 | 0 | 0 | 0 | 0 | 2   | 7  | 4  | 4 Platelet-activating factor acetylhydrolase IB subunit gamma OS=Mus musculus GN=Pafah1b3 PE=1 SV=1                                                 |
| O9CPN8      | 0.035556315 | 0 | 0 | 0 | 0 | 13  | 14 | 3  | 6 Insulin-like growth factor 2 mRNA-binding protein 1 OS=Mus musculus GN=Igf2bp3 PE=1 SV=1                                                          |
| QA0AG2JE00  | 0.036259822 | 0 | 0 | 0 | 0 | 12  | 4  | 2  | 6 PDZ and LIM domain protein 5 (Fragment) OS=Mus musculus GN=Pdlim5 PE=1 SV=1                                                                       |
| P33434      | 0.036569035 | 0 | 0 | 0 | 0 | 4   | 9  | 3  | 4 T2 Kds type IV collagenase OS=Mus musculus GN=Mmp2 PE=1 SV=1                                                                                      |
| Q9CQ60      | 0.040112916 | 0 | 0 | 0 | 0 | 14  | 9  | 5  | 6 6-phosphogluconolactonase OS=Mus musculus GN=Pglc PE=1 SV=1                                                                                       |
| O08604      | 0.058169473 | 0 | 0 | 0 | 0 | 7   | 5  | 4  | 0 Retinoic acid early-inducible protein 1-gamma OS=Mus musculus GN=Ract1c PE=1 SV=1                                                                 |
| O91V35      | 0.058492489 | 0 | 0 | 0 | 0 | 3   | 0  | 2  | 3 Receptor-type tyrosine-protein phosphatase OS=Mus musculus GN=Ptprra PE=1 SV=1                                                                    |
| O9JDU8      | 0.058801998 | 0 | 0 | 0 | 0 | 4   | 3  | 0  | 3 Sorting nexin-5 OS=Mus musculus GN=Snx5 PE=1 SV=1                                                                                                 |
| Q3Y1T2      | 0.059918484 | 0 | 0 | 0 | 0 | 39  | 29 | 8  | 29 Dihydropyrimidinase-related protein 3 OS=Mus musculus GN=Dpyd3 PE=1 SV=1                                                                         |
| Q6Q716      | 0.059931676 | 0 | 0 | 0 | 0 | 4   | 3  | 2  | 0 Prolyl 4-hydroxylase subunit alpha 2 OS=Mus musculus GN=P4ha2 PE=1 SV=1                                                                           |
| Q5SX75      | 0.059931676 | 0 | 0 | 0 | 0 | 4   | 3  | 2  | 0 Procollagen-proline, 2-oxoglutarate 4-dioxygenase (Proline 4-hydroxylase), alpha II polypeptide, isoform CRA_f OS=Mus musculus GN=P4ha2 PE=1 SV=1 |
| Q61391      | 0.059404406 | 0 | 0 | 0 | 0 | 4   | 3  | 0  | 4 Nephrylin OS=Mus musculus GN=Mme PE=1 SV=3                                                                                                        |
| P6XRL5      | 0.059605792 | 0 | 0 | 0 | 0 | 6   | 6  | 0  | 4 6-phosphogluconolactonase (Fragment) OS=Mus musculus GN=Pglc PE=1 SV=1                                                                            |
| H3B07       | 0.060211148 | 0 | 0 | 0 | 0 | 6   | 6  | 0  | 5 6-phosphogluconolactonase OS=Mus musculus GN=Pglc PE=1 SV=1                                                                                       |
| P99029      | 0.060211148 | 0 | 0 | 0 | 0 | 6   | 6  | 0  | 6 Peroxiredoxin-5, mitochondrial OS=Mus musculus GN=Prdx5 PE=1 SV=2                                                                                 |
| O70493      | 0.060211148 | 0 | 0 | 0 | 0 | 4   | 4  | 0  | 4 Sorting nexin-12 OS=Mus musculus GN=Snx12 PE=1 SV=1                                                                                               |
| Q3T627      | 0.060211148 | 0 | 0 | 0 | 0 | 4   | 4  | 0  | 4 Putative uncharacterized protein OS=Mus musculus GN=Snx12 PE=1 SV=1                                                                               |
| Q6ZW05      | 0.060211148 | 0 | 0 | 0 | 0 | 4   | 4  | 0  | 4 Putative uncharacterized protein OS=Mus musculus GN=Snx12 PE=1 SV=1                                                                               |
| Q3V2H3      | 0.060211148 | 0 | 0 | 0 | 0 | 4   | 4  | 0  | 4 Putative uncharacterized protein OS=Mus musculus GN=Snx12 PE=1 SV=1                                                                               |
| AS2474      | 0.061611669 | 0 | 0 | 0 | 0 | 7   | 7  | 0  | 6 Polymerase I and transcript release factor OS=Mus musculus GN=Pprf PE=1 SV=1                                                                      |
| A2AF47      | 0.061827257 | 0 | 0 | 0 | 0 | 3   | 2  | 3  | 3 Dedicator of cytokinesis protein 11 OS=Mus musculus GN=Dock11 PE=1 SV=1                                                                           |
| O9YK01      | 0.061829808 | 0 | 0 | 0 | 0 | 5   | 3  | 3  | 0 Pyridoxal-dependent decarboxylase domain-containing protein 1 OS=Mus musculus GN=Pdxcl1 PE=1 SV=2                                                 |
| QA0AR4J034  | 0.061829808 | 0 | 0 | 0 | 0 | 5   | 3  | 3  | 0 MCG129810, isoform CRA_c OS=Mus musculus GN=Pdxcl1 PE=1 SV=1                                                                                      |
| O54988      | 0.062594515 | 0 | 0 | 0 | 0 | 9   | 2  | 6  | 2 STE20-like serine/threonine-protein kinase OS=Mus musculus GN=Slk PE=1 SV=2                                                                       |
| P06584      | 0.063102753 | 0 | 0 | 0 | 0 | 5   | 5  | 2  | 4 Complement C5 OS=Mus musculus GN=C5 PE=1 SV=2                                                                                                     |
| F7CV15      | 0.063117774 | 0 | 0 | 0 | 0 | 7   | 4  | 0  | 6 Protein Ahnak2 (Fragment) OS=Mus musculus GN=Ahnak2 PE=1 SV=1                                                                                     |
| Q561M1      | 0.063850636 | 0 | 0 | 0 | 0 | 11  | 9  | 0  | 7 Acp1 protein OS=Mus musculus GN=Acp1 PE=1 SV=1                                                                                                    |
| O923D2      | 0.064237986 | 0 | 0 | 0 | 0 | 0   | 4  | 3  | 6 Flavin reductase (NADPH) OS=Mus musculus GN=Blvrb PE=1 SV=3                                                                                       |
| E9PZC3      | 0.064237986 | 0 | 0 | 0 | 0 | 0   | 4  | 3  | 6 Flavin reductase (NADPH) OS=Mus musculus GN=Blvrb PE=1 SV=1                                                                                       |
| Q61166      | 0.064901439 | 0 | 0 | 0 | 0 | 10  | 6  | 0  | 3 Microtubule-associated protein REEB family member 1 OS=Mus musculus GN=Mapre1 PE=1 SV=3                                                           |
| QA0AP9YUN4  | 0.065061703 | 0 | 0 | 0 | 0 | 10  | 6  | 0  | 10 Dynamin-1 OS=Mus musculus GN=Dnm1 PE=1 SV=1                                                                                                      |
| A2AF47      | 0.06691555  | 0 | 0 | 0 | 0 | 4   | 2  | 0  | 3 Dedicator of cytokinesis protein 11 OS=Mus musculus GN=Dock11 PE=1 SV=1                                                                           |
| Q5SV11      | 0.067234945 | 0 | 0 | 0 | 0 | 6   | 0  | 4  | 8 Calcium/calmodulin-dependent protein kinase type I subunit beta OS=Mus musculus GN=Camk2b PE=1 SV=1                                               |
| Q5SV10      | 0.067234945 | 0 | 0 | 0 | 0 | 6   | 0  | 4  | 8 Calcium/calmodulin-dependent protein kinase type I subunit beta OS=Mus musculus GN=Camk2b PE=1 SV=1                                               |
| Q5SV10      | 0.067234945 | 0 | 0 | 0 | 0 | 6   | 0  | 4  | 8 Calcium/calmodulin-dependent protein kinase type II subunit beta OS=Mus musculus GN=Camk2b PE=1 SV=1                                              |
| Q5SV11      | 0.067234945 | 0 | 0 | 0 | 0 | 6   | 0  | 4  | 8 Calcium/calmodulin-dependent protein kinase type II subunit beta OS=Mus musculus GN=Camk2b PE=1 SV=1                                              |
| O5SV12      | 0.067234945 | 0 | 0 | 0 | 0 | 6   | 0  | 4  | 8 Calcium/calmodulin-dependent protein kinase type I subunit beta OS=Mus musculus GN=Camk2b PE=1 SV=1                                               |
| Q5SV13      | 0.067234945 | 0 | 0 | 0 | 0 | 6   | 0  | 4  | 8 Calcium/calmodulin-dependent protein kinase type I subunit beta OS=Mus musculus GN=Camk2b PE=1 SV=1                                               |
| O5SV19      | 0.067234945 | 0 | 0 | 0 | 0 | 6   | 0  | 4  | 8 Calcium/calmodulin-dependent protein kinase type II subunit beta OS=Mus musculus GN=Camk2b PE=1 SV=1                                              |
| P28652      | 0.067234945 | 0 | 0 | 0 | 0 | 6   | 0  | 4  | 8 Calcium/calmodulin-dependent protein kinase type II subunit beta OS=Mus musculus GN=Camk2b PE=1 SV=1                                              |
| O923T9      | 0.067234945 | 0 | 0 | 0 | 0 | 6   | 0  | 4  | 8 Calcium/calmodulin-dependent protein kinase type I subunit gamma OS=Mus musculus GN=Camk2g PE=1 SV=1                                              |
| E9QV19      | 0.067234945 | 0 | 0 | 0 | 0 | 6   | 0  | 4  | 8 Calcium/calmodulin-dependent protein kinase type I subunit delta OS=Mus musculus GN=Camk2d PE=1 SV=1                                              |
| O9IQW0      | 0.067234945 | 0 | 0 | 0 | 0 | 6   | 0  | 4  | 8 Calcium/calmodulin-dependent protein kinase type I subunit delta OS=Mus musculus GN=Camk2d PE=1 SV=1                                              |
| O9Q1T1      | 0.067234945 | 0 | 0 | 0 | 0 | 6   | 0  | 4  | 8 Calcium/calmodulin-dependent protein kinase type II subunit delta OS=Mus musculus GN=Camk2d PE=1 SV=1                                             |
| Q68E62      | 0.067234945 | 0 | 0 | 0 | 0 | 6   | 0  | 4  | 8 Calcium/calmodulin-dependent protein kinase type I subunit beta OS=Mus musculus GN=Camk2b PE=1 SV=1                                               |
| QA0AR4J054  | 0.067234945 | 0 | 0 | 0 | 0 | 6   | 0  | 4  | 8 Calcium/calmodulin-dependent protein kinase type I subunit delta OS=Mus musculus GN=Camk2d PE=1 SV=1                                              |
| Q6PHZ2      | 0.067234945 | 0 | 0 | 0 | 0 | 6   | 0  | 4  | 8 Calcium/calmodulin-dependent protein kinase type II subunit delta OS=Mus musculus GN=Camk2d PE=1 SV=1                                             |
| P24472      | 0.067808674 | 0 | 0 | 0 | 0 | 6   | 3  | 0  | 4 Glutathione S-transferase A4 OS=Mus musculus GN=GstA4 PE=1 SV=3                                                                                   |
| Q9DAW9      | 0.068505488 | 0 | 0 | 0 | 0 | 4   | 5  | 0  | 4 Calponin-3 OS=Mus musculus GN=Cnn3 PE=1 SV=1                                                                                                      |
| QA0AR4J0V8  | 0.068505488 | 0 | 0 | 0 | 0 | 4   | 5  | 0  |                                                                                                                                                     |

|                                         |             |   |   |   |    |   |   |                                                                                                                                    |
|-----------------------------------------|-------------|---|---|---|----|---|---|------------------------------------------------------------------------------------------------------------------------------------|
| P82343                                  | 0.108131208 | 0 | 0 | 0 | 2  | 0 | 3 | 2 N-acetylglucosamine 2-epimerase OS-Mus musculus GN=Rembp PE=1 SV=3                                                               |
| P70193                                  | 0.110262818 | 0 | 0 | 0 | 0  | 6 | 7 | 3 Leucine-rich repeats and immunoglobulin-like domains protein 1 OS-Mus musculus GN=Lrig1 PE=1 SV=2                                |
| E90288                                  | 0.110780878 | 0 | 0 | 0 | 0  | 0 | 2 | 6 Voltage-dependent calcium channel subunit alpha-2delta1 OS-Mus musculus GN=Cacn2d1 PE=1 SV=2                                     |
| OQ8332                                  | 0.110780878 | 0 | 0 | 0 | 0  | 0 | 2 | 6 Voltage-dependent calcium channel subunit alpha-2delta1 OS-Mus musculus GN=Cacn2d1 PE=1 SV=1                                     |
| Q6NXL1                                  | 0.116682183 | 0 | 0 | 0 | 2  | 6 | 3 | 0 Protein Sec24d OS-Mus musculus GN=Sec24d PE=1 SV=1                                                                               |
| OS9086                                  | 0.119286607 | 0 | 0 | 0 | 2  | 0 | 4 | 3 RNA-binding protein 3 OS-Mus musculus GN=Rbm3 PE=1 SV=1                                                                          |
| Q8B613                                  | 0.119286607 | 0 | 0 | 0 | 2  | 0 | 4 | 3 Putative uncharacterized protein OS-Mus musculus GN=Rbm3 PE=1 SV=1                                                               |
| Q9QZM0                                  | 0.119897959 | 0 | 0 | 0 | 5  | 4 | 0 | 2 Ubiquitin 2 OS-Mus musculus GN=Ubp2 PE=1 SV=2                                                                                    |
| Reverse_tr E0CXL4 E0CXL4_MOUSE          | 0.181697101 | 0 | 0 | 0 | 5  | 4 | 0 | 0 Partitioning defective 3 homolog OS-Mus musculus GN=Par3 PE=1 SV=1                                                               |
| Reverse_sp Q99NH2 PARD3_MOUSE           | 0.181697101 | 0 | 0 | 0 | 5  | 4 | 0 | 0 Partitioning defective 3 homolog OS-Mus musculus GN=Par3 PE=1 SV=2                                                               |
| P25446                                  | 0.181697101 | 0 | 0 | 0 | 5  | 4 | 0 | 0 Tumor necrosis factor receptor superfamily member 6 OS-Mus musculus GN=Fn3 PE=1 SV=2                                             |
| Q01721                                  | 0.181697101 | 0 | 0 | 0 | 5  | 4 | 0 | 0 Growth cone-specific protein 1 OS-Mus musculus GN=Gas1 PE=1 SV=2                                                                 |
| Reverse_tr E0CZE2 E0CZE2_MOUSE          | 0.181697101 | 0 | 0 | 0 | 5  | 4 | 0 | 0 Partitioning defective 3 homolog (Fragment) OS-Mus musculus GN=Par3 PE=1 SV=1                                                    |
| Reverse_tr B7ZNY3 B7ZNY3_MOUSE          | 0.181697101 | 0 | 0 | 0 | 5  | 4 | 0 | 0 Par3 protein OS-Mus musculus GN=Par3 PE=1 SV=1                                                                                   |
| Reverse_tr A0A0R81J Y4A0A0R81J.Y4_MOUSE | 0.181697101 | 0 | 0 | 0 | 5  | 4 | 0 | 0 Partitioning defective 3 homolog OS-Mus musculus GN=Par3 PE=1 SV=1                                                               |
| Reverse_tr E0CKX5 E0CKX5_MOUSE          | 0.181697101 | 0 | 0 | 0 | 5  | 4 | 0 | 0 Partitioning defective 3 homolog (Fragment) OS-Mus musculus GN=Par3 PE=1 SV=1                                                    |
| Reverse_tr F6GUG7 F6GUG7_MOUSE          | 0.181697101 | 0 | 0 | 0 | 5  | 4 | 0 | 0 Partitioning defective 3 homolog (Fragment) OS-Mus musculus GN=Par3 PE=1 SV=1                                                    |
| A0A0R40J77                              | 0.181697101 | 0 | 0 | 0 | 5  | 4 | 0 | 0 Growth cone-specific protein 1 OS-Mus musculus GN=Gas1 PE=1 SV=1                                                                 |
| Reverse_tr GX3A13 GX3A13_MOUSE          | 0.181697101 | 0 | 0 | 0 | 5  | 4 | 0 | 0 Par3 (Partitioning defective 3) homolog (C. elegans) OS-Mus musculus GN=Par3 PE=1 SV=1                                           |
| Reverse_tr ASD6P2 ASD6P2_MOUSE          | 0.181697101 | 0 | 0 | 0 | 5  | 4 | 0 | 0 Par3 (Partitioning defective 3) homolog (C. elegans) OS-Mus musculus GN=Par3 PE=1 SV=1                                           |
| D32765                                  | 0.181783016 | 0 | 0 | 0 | 0  | 0 | 2 | 3 Putative RNA-binding protein Luc7-like 1 (Fragment) OS-Mus musculus GN=Luc71 PE=1 SV=1                                           |
| Reverse_sp Q99J88 SMRD2_MOUSE           | 0.181783016 | 0 | 0 | 0 | 0  | 0 | 2 | 3 SWI5N1-related matrix-associated actin-dependent regulator of chromatin subfamily D member 2 OS-Mus musculus GN=Smard2 PE=1 SV=2 |
| D3Y219                                  | 0.181783016 | 0 | 0 | 0 | 0  | 0 | 2 | 3 DNA-directed RNA polymerase II subunit RPB1 OS-Mus musculus GN=Polr2j PE=1 SV=1                                                  |
| A0A1B0G8M7                              | 0.181783016 | 0 | 0 | 0 | 0  | 0 | 3 | 3 Euc1 homolog (S. cerevisiae)-like, isoform CRA_c OS-Mus musculus GN=Luc71 PE=1 SV=1                                              |
| Q31TR6                                  | 0.181932095 | 0 | 0 | 0 | 4  | 3 | 0 | 0 Prefoldin subunit 3 OS-Mus musculus GN=Vbp1 PE=1 SV=1                                                                            |
| Q92119                                  | 0.181932095 | 0 | 0 | 0 | 4  | 3 | 0 | 0 Exosome complex component RRP41 OS-Mus musculus GN=Exosa4 PE=1 SV=3                                                              |
| Q6VGS5                                  | 0.182507666 | 0 | 0 | 0 | 0  | 0 | 3 | 0 Protein Daple OS-Mus musculus GN=Ced48c PE=1 SV=1                                                                                |
| Q92WZ5                                  | 0.182507666 | 0 | 0 | 0 | 0  | 0 | 2 | 0 Histone H1 OS-Mus musculus GN=Hnp1 PE=1 SV=1                                                                                     |
| Q9ESN9                                  | 0.182507666 | 0 | 0 | 0 | 0  | 0 | 2 | 0 C-Jun-amino-terminal kinase-interacting protein 3 OS-Mus musculus GN=Mapk3ip3 PE=1 SV=1                                          |
| J3QNR6                                  | 0.182507666 | 0 | 0 | 0 | 0  | 0 | 2 | 0 C-Jun-amino-terminal kinase-interacting protein 3 OS-Mus musculus GN=Mapk3ip3 PE=1 SV=1                                          |
| Q8R3B1                                  | 0.182507666 | 0 | 0 | 0 | 0  | 0 | 4 | 0 4-1-phosphatidylinositol 4,5-bisphosphate phosphodiesterase delta-1 OS-Mus musculus GN=Ptdcl1 PE=1 SV=2                          |
| E9Q6M6                                  | 0.182507666 | 0 | 0 | 0 | 0  | 2 | 0 | 0 C-Jun-amino-terminal kinase-interacting protein 3 OS-Mus musculus GN=Mapk3ip3 PE=1 SV=1                                          |
| E9Q6D0                                  | 0.182507666 | 0 | 0 | 0 | 0  | 0 | 2 | 0 C-Jun-amino-terminal kinase-interacting protein 3 OS-Mus musculus GN=Mapk3ip3 PE=1 SV=1                                          |
| Q5SW88                                  | 0.182507666 | 0 | 0 | 0 | 0  | 0 | 3 | 0 Protein Rab1a OS-Mus musculus GN=Rab1a PE=1 SV=1                                                                                 |
| Q5SW87                                  | 0.182507666 | 0 | 0 | 0 | 0  | 0 | 3 | 0 Protein Rab1a OS-Mus musculus GN=Rab1a PE=1 SV=1                                                                                 |
| K3W454                                  | 0.182507666 | 0 | 0 | 0 | 0  | 2 | 0 | 0 C-Jun-amino-terminal kinase-interacting protein 3 OS-Mus musculus GN=Mapk3ip3 PE=1 SV=1                                          |
| Q60817                                  | 0.182862354 | 0 | 0 | 0 | 0  | 0 | 2 | 0 Nascent polypeptide-associated complex subunit alpha OS-Mus musculus GN=Naa PE=1 SV=1                                            |
| P50518                                  | 0.183048992 | 0 | 0 | 0 | 2  | 0 | 0 | 2 V-type proton ATPase subunit E 1 OS-Mus musculus GN=Atpv61e1 PE=1 SV=2                                                           |
| P47791                                  | 0.183048992 | 0 | 0 | 0 | 4  | 0 | 0 | 4 Glutathione reductase, mitochondrial OS-Mus musculus GN=Gr PE=1 SV=3                                                             |
| Q9JHD0                                  | 0.183048992 | 0 | 0 | 0 | 4  | 0 | 0 | 4 Matrix metalloproteinase-19 OS-Mus musculus GN=Mmp19 PE=2 SV=1                                                                   |
| A0A1B0G8G1                              | 0.183048992 | 0 | 0 | 0 | 4  | 0 | 0 | 4 Ras-related protein R-Ra (Fragment) OS-Mus musculus GN=Ra PE=1 SV=1                                                              |
| A0A0N45W07                              | 0.183048992 | 0 | 0 | 0 | 2  | 0 | 0 | 0 V-type proton ATPase subunit E 1 (Fragment) OS-Mus musculus GN=Atpv61e1 PE=1 SV=1                                                |
| A0A0N45W34                              | 0.183048992 | 0 | 0 | 0 | 2  | 0 | 0 | 0 V-type proton ATPase subunit E 1 (Fragment) OS-Mus musculus GN=Atpv61e1 PE=1 SV=1                                                |
| P62743                                  | 0.183147324 | 0 | 0 | 0 | 0  | 0 | 3 | 0 AP-2 complex subunit sigma OS-Mus musculus GN=Ap2l1 PE=1 SV=1                                                                    |
| Q91YR9                                  | 0.183629719 | 0 | 0 | 0 | 0  | 0 | 3 | 0 Protein kinase C OS-Mus musculus GN=Prck1 PE=1 SV=1                                                                              |
| Q92ZH5                                  | 0.183629719 | 0 | 0 | 0 | 4  | 0 | 0 | 3 Band 4.1-like protein 1 OS-Mus musculus GN=Ep4111 PE=1 SV=2                                                                      |
| E9PV14                                  | 0.183629719 | 0 | 0 | 0 | 4  | 0 | 0 | 3 Band 4.1-like protein 1 (Fragment) OS-Mus musculus GN=Ep4111 PE=1 SV=1                                                           |
| Q9PCP0                                  | 0.183629719 | 0 | 0 | 0 | 4  | 0 | 0 | 3 Lactoylglutathione lyase OS-Mus musculus GN=Gle1 PE=1 SV=1                                                                       |
| A2AUK5                                  | 0.183629719 | 0 | 0 | 0 | 4  | 0 | 0 | 3 Band 4.1-like protein 1 OS-Mus musculus GN=Ep4111 PE=1 SV=1                                                                      |
| A2AUK8                                  | 0.183629719 | 0 | 0 | 0 | 4  | 0 | 0 | 3 Band 4.1-like protein 1 OS-Mus musculus GN=Ep4111 PE=1 SV=1                                                                      |
| A2AUK6                                  | 0.183629719 | 0 | 0 | 0 | 4  | 0 | 0 | 3 Band 4.1-like protein 1 OS-Mus musculus GN=Ep4111 PE=1 SV=1                                                                      |
| A2AUK7                                  | 0.183629719 | 0 | 0 | 0 | 4  | 0 | 0 | 3 Band 4.1-like protein 1 OS-Mus musculus GN=Ep4111 PE=1 SV=1                                                                      |
| Q9J2R8                                  | 0.184049693 | 0 | 0 | 0 | 0  | 0 | 3 | 0 Protein factor receptor-bound protein 2 OS-Mus musculus GN=Prkb2 PE=1 SV=3                                                       |
| F7CJN9                                  | 0.185306662 | 0 | 0 | 0 | 4  | 0 | 3 | 0 Serotransferrin (Fragment) OS-Mus musculus GN=Trf PE=4 SV=1                                                                      |
| Q91ZJ5                                  | 0.185306662 | 0 | 0 | 0 | 4  | 0 | 3 | 0 UTP-glucose-1-phosphate uridylyltransferase OS-Mus musculus GN=Ugtp2 PE=1 SV=3                                                   |
| Q9JLB0                                  | 0.185925393 | 0 | 0 | 0 | 3  | 3 | 0 | 0 MACUK p55 subfamily member 6 OS-Mus musculus GN=Mpp6 PE=1 SV=1                                                                   |
| P48774                                  | 0.185925393 | 0 | 0 | 0 | 3  | 3 | 0 | 0 Glutathione S-transferase Mu 5 OS-Mus musculus GN=Gstm5 PE=1 SV=1                                                                |
| Q9ER60                                  | 0.185925393 | 0 | 0 | 0 | 2  | 2 | 0 | 0 LIM domain and actin-binding protein 1 OS-Mus musculus GN=Limal1 PE=1 SV=3                                                       |
| Q5NCL4                                  | 0.185925393 | 0 | 0 | 0 | 2  | 2 | 0 | 0 SPARC OS-Mus musculus GN=Spare PE=1 SV=1                                                                                         |
| P07214                                  | 0.185925393 | 0 | 0 | 0 | 2  | 2 | 0 | 0 SPARC OS-Mus musculus GN=Spare PE=1 SV=1                                                                                         |
| Q5N455                                  | 0.185925393 | 0 | 0 | 0 | 2  | 2 | 0 | 0 C-Jun-amino-terminal kinase-interacting protein 4 OS-Mus musculus GN=Spag9 PE=1 SV=2                                             |
| B2RQ02                                  | 0.185925393 | 0 | 0 | 0 | 3  | 3 | 0 | 0 PHD finger protein 3 OS-Mus musculus GN=Phf3 PE=1 SV=1                                                                           |
| E9Q512                                  | 0.187361206 | 0 | 0 | 0 | 0  | 3 | 2 | 0 Protein Trip11 OS-Mus musculus GN=Trip11 PE=1 SV=1                                                                               |
| E9Q0U3                                  | 0.187361206 | 0 | 0 | 0 | 0  | 2 | 3 | 0 BRCA1-A complex subunit BRE OS-Mus musculus GN=Bre PE=1 SV=1                                                                     |
| Q8BY99                                  | 0.187361206 | 0 | 0 | 0 | 0  | 0 | 3 | 0 Protein Trip11 (Fragment) OS-Mus musculus GN=Trip11 PE=1 SV=1                                                                    |
| Q9CQX6                                  | 0.187361206 | 0 | 0 | 0 | 0  | 6 | 6 | 0 MCC11091, isoform CRA_a OS-Mus musculus GN=Gm16286 PE=1 SV=1                                                                     |
| Q9R059                                  | 0.187555485 | 0 | 0 | 0 | 9  | 0 | 0 | 0 Four and a half LIM domains protein 3 OS-Mus musculus GN=Fhl3 PE=1 SV=2                                                          |
| P06837                                  | 0.187555485 | 0 | 0 | 0 | 3  | 0 | 0 | 2 Neuromodulin OS-Mus musculus GN=Gap43 PE=1 SV=1                                                                                  |
| Q1MX43                                  | 0.187555485 | 0 | 0 | 0 | 3  | 0 | 0 | 2 Protein kinase C OS-Mus musculus GN=Prckd1 PE=1 SV=1                                                                             |
| Q1MX42                                  | 0.187555485 | 0 | 0 | 0 | 3  | 0 | 0 | 2 Protein kinase C OS-Mus musculus GN=Prckd1 PE=1 SV=1                                                                             |
| Q1MX41                                  | 0.187555485 | 0 | 0 | 0 | 3  | 0 | 0 | 2 Protein kinase C delta type OS-Mus musculus GN=Prckd1 PE=1 SV=1                                                                  |
| Q1MX40                                  | 0.187555485 | 0 | 0 | 0 | 3  | 0 | 0 | 2 Protein kinase C OS-Mus musculus GN=Prckd1 PE=1 SV=1                                                                             |
| P28867                                  | 0.187555485 | 0 | 0 | 0 | 3  | 0 | 0 | 2 Protein kinase C delta type OS-Mus musculus GN=Prckd1 PE=1 SV=1                                                                  |
| Q9D977                                  | 0.187717479 | 0 | 0 | 0 | 0  | 0 | 3 | 0 N-acetyl-D-glucosaminase OS-Mus musculus GN=Nagk PE=1 SV=1                                                                       |
| Q9OZ08                                  | 0.187717479 | 0 | 0 | 0 | 5  | 3 | 0 | 0 N-acetyl-D-glucosamine kinase OS-Mus musculus GN=Nagk PE=1 SV=1                                                                  |
| G3UYL4                                  | 0.189284287 | 0 | 0 | 0 | 5  | 0 | 0 | 6 Flotillin-1 OS-Mus musculus GN=Flot1 PE=1 SV=1                                                                                   |
| Q60631                                  | 0.189284287 | 0 | 0 | 0 | 5  | 0 | 0 | 4 Growth factor receptor-bound protein 2 OS-Mus musculus GN=Grb2 PE=1 SV=1                                                         |
| B1AT92                                  | 0.189284287 | 0 | 0 | 0 | 6  | 4 | 0 | 4 Protein factor receptor-bound protein 2 OS-Mus musculus GN=Grb2 PE=1 SV=1                                                        |
| O08795                                  | 0.192234684 | 0 | 0 | 0 | 0  | 0 | 2 | 2 Glucosidase 2 subunit beta OS-Mus musculus GN=Prkcah1 PE=1 SV=1                                                                  |
| Q3UDM0                                  | 0.192234684 | 0 | 0 | 0 | 0  | 0 | 3 | 3 MOB kinase activator 1B OS-Mus musculus GN=Mob1b PE=1 SV=1                                                                       |
| Q921Y0                                  | 0.192234684 | 0 | 0 | 0 | 0  | 0 | 3 | 3 MOB kinase activator 1A OS-Mus musculus GN=Mob1a PE=2 SV=3                                                                       |
| Q8RFB0                                  | 0.192234684 | 0 | 0 | 0 | 0  | 0 | 3 | 3 MOB kinase activator 1B OS-Mus musculus GN=Mob1b PE=1 SV=1                                                                       |
| G64339                                  | 0.194957854 | 0 | 0 | 0 | 3  | 0 | 0 | 4 Ubiquitin-like protein ISG15 OS-Mus musculus GN=Isig15 PE=1 SV=4                                                                 |
| D3Z4U3                                  | 0.1952413   | 0 | 0 | 0 | 0  | 4 | 2 | 0 Ubiquitin-conjugating enzyme E2 K OS-Mus musculus GN=Ube2k PE=1 SV=1                                                             |
| Q921M7                                  | 0.197263378 | 0 | 0 | 0 | 4  | 5 | 0 | 0 Protein FAM49B OS-Mus musculus GN=Fam49b PE=1 SV=1                                                                               |
| Q61792                                  | 0.19759151  | 0 | 0 | 0 | 0  | 0 | 3 | 0 LIM and SH3 domain protein 1 OS-Mus musculus GN=Lsd1 PE=1 SV=1                                                                   |
| B7ZC96                                  | 0.200381786 | 0 | 0 | 0 | 3  | 0 | 3 | 0 Copine-1 (Fragment) OS-Mus musculus GN=Cpne1 PE=1 SV=2                                                                           |
| P06795                                  | 0.200381786 | 0 | 0 | 0 | 2  | 0 | 2 | 0 Multidrug resistance protein 1B OS-Mus musculus GN=Abcb1b PE=1 SV=1                                                              |
| A0A1B0G8E3                              | 0.200707146 | 0 | 0 | 0 | 0  | 0 | 3 | 2 Charged multivesicular body protein 2a OS-Mus musculus GN=Chmp2a PE=1 SV=1                                                       |
| A0A1B0G7F5                              | 0.200707146 | 0 | 0 | 0 | 0  | 0 | 3 | 2 Charged multivesicular body protein 2a OS-Mus musculus GN=Chmp2a PE=1 SV=1                                                       |
| A0A1B0G8H4                              | 0.200707146 | 0 | 0 | 0 | 0  | 0 | 3 | 2 Charged multivesicular body protein 2a OS-Mus musculus GN=Chmp2a PE=1 SV=1                                                       |
| Q08879                                  | 0.200707146 | 0 | 0 | 0 | 0  | 0 | 3 | 0 Fibulin-1 OS-Mus musculus GN=Fbln1 PE=1 SV=2                                                                                     |
| P31230                                  | 0.201637289 | 0 | 0 | 0 | 3  | 4 | 0 | 0 Aminoacyl tRNA synthetase complex-interacting multifunctional protein 1 OS-Mus musculus GN=Aimp1 PE=1 SV=2                       |
| Q3Y424                                  | 0.201637289 | 0 | 0 | 0 | 0  | 0 | 3 | 0 Aminoacyl tRNA synthetase complex-interacting multifunctional protein 1 OS-Mus musculus GN=Aimp1 PE=1 SV=1                       |
| G5E830                                  | 0.202805091 | 0 | 0 | 0 | 2  | 0 | 0 | 3 Neurogenic locus notch homolog protein 2 OS-Mus musculus GN=Noch2 PE=1 SV=1                                                      |
| F7BE32                                  | 0.204062024 | 0 | 0 | 0 | 0  | 0 | 6 | 5 Ras-related protein Rab-34 (Fragment) OS-Mus musculus GN=Rab34 PE=1 SV=1                                                         |
| P12032                                  | 0.204347839 | 0 | 0 | 0 | 0  | 3 | 4 | 0 Metalloproteinase inhibitor 1 OS-Mus musculus GN=Timp1 PE=1 SV=2                                                                 |
| Q61703                                  | 0.204697228 | 0 | 0 | 0 | 6  | 0 | 0 | 3 Inter-alpha-trypsin inhibitor heavy chain H2 OS-Mus musculus GN=Hb2 PE=1 SV=1                                                    |
| G3Y977                                  | 0.204697228 | 0 | 0 | 0 | 6  | 0 | 0 | 3 Inter-alpha-trypsin inhibitor, heavy chain 2 OS-Mus musculus GN=Hb2 PE=1 SV=1                                                    |
| Q80X81                                  | 0.204697228 | 0 | 0 | 0 | 6  | 0 | 0 | 3 Acetyl-Coenzyme A acetyltransferase 3 OS-Mus musculus GN=Acat3 PE=1 SV=1                                                         |
| P28301                                  | 0.205926322 | 0 | 0 | 0 | 9  | 4 | 0 | 0 Protein-lysine 6-oxidase OS-Mus musculus GN=Lox PE=1 SV=1                                                                        |
| O88428                                  | 0.210607504 | 0 | 0 | 0 | 2  | 3 | 0 | 0 Bifunctional 3'-phosphoadenosine 5'-phosphatidyltransferase 2 OS-Mus musculus GN=Paps2 PE=1 SV=2                                 |
| A2AT02                                  | 0.210919196 | 0 | 0 | 0 | 0  | 0 | 0 | 5 NSF1 OS-Mus musculus GN=Nfilc1 PE=1 SV=1                                                                                         |
| Q8R550                                  | 0.213667784 | 0 | 0 | 0 | 2  | 2 | 3 | 0 SH3 domain-containing kinase-binding protein 1 OS-Mus musculus GN=Shk3ip1 PE=1 SV=1                                              |
| B0R0Y8                                  | 0.213667784 | 0 | 0 | 0 | 0  | 0 | 2 | 3 SH3 domain-containing kinase-binding protein 1 (Fragment) OS-Mus musculus GN=Shk3ip1 PE=1 SV=1                                   |
| P35288                                  | 0.222420871 | 0 | 0 | 0 | 0  | 0 | 3 | 2 Ras-related protein Rab-23 OS-Mus musculus GN=Rab23 PE=1 SV=2                                                                    |
| Q9D4B9                                  | 0.222420871 | 0 | 0 | 0 | 0  | 0 | 3 | 2 Putative uncharacterized protein OS-Mus musculus GN=Rab23 PE=1 SV=1                                                              |
| Q61035                                  | 0.224016507 | 0 | 0 | 0 | 0  | 4 | 0 | 2 Histidine-4RNA ligase, cytoplasmic OS-Mus musculus GN=Hars PE=1 SV=2                                                             |
| Q99JY8                                  | 0.226672289 | 0 | 0 | 0 | 2  | 0 | 0 | 4 Phospholipid phosphatase 3 OS-Mus musculus GN=Ppp3 PE=1 SV=1                                                                     |
| O55516                                  | 0.226672289 | 0 | 0 | 0 | 2  | 0 | 0 | 4 Neurogenic locus notch homolog protein 2 OS-Mus musculus GN=Noch2 PE=1 SV=1                                                      |
| G3Y425                                  | 0.229008823 | 0 | 0 | 0 | 8  | 0 | 0 | 3 Acetyl-CoA acetyltransferase, cytosolic OS-Mus musculus GN=Acat2 PE=1 SV=1                                                       |
| Q8CAV6                                  | 0.229008823 | 0 | 0 | 0 | 8  | 0 | 0 | 3 Acetyl-CoA acetyltransferase, cytosolic OS-Mus musculus GN=Acat2 PE=1 SV=2                                                       |
| Q6NZD2                                  | 0.234346693 | 0 | 0 | 0 | 2  | 0 | 0 | 0 Putative uncharacterized protein OS-Mus musculus GN=Snx1 PE=1 SV=1                                                               |
| contaminant_UBIQUITIN09                 | 0.234346693 | 0 | 0 | 0 | 2  | 0 | 3 | 0 no description                                                                                                                   |
| Q9W800                                  | 0.234346693 | 0 | 0 | 0 | 2  | 0 | 3 | 0 Sorting signal 1 OS-Mus musculus GN=Sx1 PE=1 SV=1                                                                                |
| Q9ER72                                  | 0.234346693 | 0 | 0 | 0 | 2  | 0 | 3 | 0 Cysteine-4RNA ligase, cytoplasmic OS-Mus musculus GN=Cars PE=1 SV=2                                                              |
| Q8BNDS                                  | 0.250454941 | 0 | 0 | 0 | 3  | 7 | 0 | 0 Sulfhydryl oxidase 1 OS-Mus musculus GN=Qsox1 PE=1 SV=1                                                                          |
| P26833                                  | 0.27385809  | 0 | 0 | 0 | 13 | 0 | 0 | 3 Peptidyl-prolyl cis-trans isomerase FKBP1A OS-Mus musculus GN=Fkbp1a PE=1 SV=2                                                   |
| P25799                                  | 0.286716188 | 0 | 0 | 0 | 0  | 0 | 7 | 0 Neurofactor NF-kappa-B p105 subunit OS-Mus musculus GN=Nfkb1 PE=1 SV=2                                                           |
| D6RFU9                                  | 0.291002219 | 0 | 0 | 0 | 0  | 0 | 0 | 5 Synaptophysin-like protein 1 OS-Mus musculus GN=Synpl1 PE=1 SV=1                                                                 |
| Reverse_tr A2A7T3 A2A7T3_MOUSE          | 0.391002219 | 0 | 0 | 0 | 0  | 0 | 0 | 4 Arginine-glutamic acid dipeptide repeats protein OS-Mus musculus GN=Rere PE=1 SV=1                                               |
| Q9R1L5                                  | 0.391002219 | 0 | 0 | 0 | 2  | 0 | 0 | 0 Microtubule-associated serine/threonine protein kinase 1 OS-Mus musculus GN=Mas1 PE=1 SV=3                                       |
| O55091                                  | 0.391002219 | 0 | 0 | 0 | 0  | 0 | 0 | 6 Prothymosin OS-Mus musculus GN=Thymosin PE=1 SV=2                                                                                |
| E9Q3L4                                  | 0.391002219 | 0 | 0 | 0 | 2  | 0 | 0 | 0 Protein H207 OS-Mus musculus GN=H207 PE=1 SV=2                                                                                   |
| E9Q3L2                                  | 0.391002219 | 0 | 0 | 0 | 0  | 0 | 0 | 2 Phosphatidylinositol 4-kinase alpha OS-Mus musculus GN=P4ka PE=1 SV=2                                                            |
| O5D0E0                                  | 0.391002219 | 0 | 0 | 0 | 2  | 0 | 0 |                                                                                                                                    |





|                      |             |     |     |     |     |      |     |     |     |                                                                                                         |
|----------------------|-------------|-----|-----|-----|-----|------|-----|-----|-----|---------------------------------------------------------------------------------------------------------|
| P02468               | 0.002943171 | 35  | 32  | 33  | 9   | 103  | 96  | 53  | 77  | Laminin subunit gamma-1 OS-Mus musculus GN=Lamc1 PE=1 SV=2                                              |
| A24757               | 0.002754969 | 3   | 0   | 4   | 0   | 11   | 9   | 10  | 12  | Tyrosine-tyrosine ligase OS-Mus musculus GN=Yars PE=1 SV=1                                              |
| Q91W03               | 0.00254969  | 0   | 0   | 3   | 0   | 11   | 9   | 10  | 12  | Tyrosine-tyrosine ligase, cytoplasmic OS-Mus musculus GN=Yars PE=1 SV=3                                 |
| K01072               | 0.044523102 | 0   | 3   | 3   | 0   | 5    | 7   | 12  | 12  | Disintegrin and metalloproteinase domain-containing protein 9 OS-Mus musculus GN=Adam9 PE=1 SV=2        |
| E9Q638               | 0.044523102 | 0   | 3   | 3   | 0   | 5    | 7   | 12  | 12  | Disintegrin and metalloproteinase domain-containing protein 9 OS-Mus musculus GN=Adam9 PE=1 SV=1        |
| AA0140LHU0           | 0.044523102 | 0   | 3   | 3   | 0   | 5    | 7   | 12  | 12  | Disintegrin and metalloproteinase domain-containing protein 9 OS-Mus musculus GN=Adam9 PE=1 SV=1        |
| Q9JH24               | 0.065550309 | 0   | 2   | 0   | 0   | 6    | 6   | 0   | 6   | 60S ribosomal protein L38 OS-Mus musculus GN=Rpl38 PE=1 SV=3                                            |
| HE8BK4               | 0.212731185 | 2   | 2   | 2   | 0   | 7    | 5   | 13  | 6   | 6 AMP-dependent protein kinase type II-beta regulatory subunit OS-Mus musculus GN=Pkar2b PE=1 SV=1      |
| P48678               | 0.012732126 | 20  | 12  | 18  | 7   | 52   | 46  | 33  | 37  | Prelamin-A/C OS-Mus musculus GN=Lma PE=1 SV=2                                                           |
| K01R12               | 0.005968047 | 17  | 18  | 18  | 9   | 51   | 44  | 38  | 48  | Tropomyosin alpha-4 chain OS-Mus musculus GN=Tpm4 PE=1 SV=3                                             |
| B7FAU9               | 0.006572122 | 99  | 73  | 99  | 20  | 304  | 195 | 138 | 212 | Filamin OS-Mus musculus GN=Fla PE=1 SV=1                                                                |
| Q8BTM5               | 0.004572122 | 99  | 73  | 99  | 20  | 304  | 195 | 138 | 212 | Filamin A OS-Mus musculus GN=Fla PE=1 SV=1                                                              |
| BI4AZ6               | 0.022450116 | 3   | 2   | 0   | 0   | 10   | 5   | 4   | 10  | Brain-specific angiogenesis inhibitor 1-associated protein 2 OS-Mus musculus GN=Biap2 PE=1 SV=1         |
| Q8BKX1               | 0.022450116 | 3   | 2   | 0   | 0   | 10   | 5   | 4   | 10  | Brain-specific angiogenesis inhibitor 1-associated protein 2 OS-Mus musculus GN=Biap2 PE=1 SV=2         |
| PGCG49               | 0.361490741 | 0   | 0   | 0   | 51  | 147  | 0   | 0   | 0   | Polysubiquitin-8 OS-Mus musculus GN=Ubb PE=2 SV=1                                                       |
| P06745               | 0.007100537 | 6   | 8   | 7   | 0   | 19   | 0   | 0   | 18  | 2 Glu-tRNA synthetase isomerase OS-Mus musculus GN=Gpi PE=1 SV=4                                        |
| Q5SX22               | 0.856428706 | 0   | 0   | 0   | 46  | 131  | 0   | 0   | 0   | Polysubiquitin-8 (Fragment) OS-Mus musculus GN=Ubb PE=4 SV=2                                            |
| Q09061               | 0.082808176 | 2   | 0   | 0   | 0   | 8    | 6   | 0   | 3   | Proteasome subunit type-1 OS-Mus musculus GN=Pamb1 PE=1 SV=1                                            |
| D3VYL0               | 0.092955025 | 0   | 0   | 2   | 0   | 0    | 5   | 8   | 4   | Putative helicase MOV-10 OS-Mus musculus GN=Mov10 PE=1 SV=2                                             |
| E9FWS9               | 0.092955025 | 0   | 0   | 2   | 0   | 0    | 5   | 8   | 4   | Putative helicase MOV-10 OS-Mus musculus GN=Mov10 PE=1 SV=1                                             |
| P23249               | 0.092955025 | 0   | 0   | 2   | 0   | 0    | 5   | 8   | 4   | Putative helicase MOV-10 OS-Mus musculus GN=Mov10 PE=1 SV=2                                             |
| D3Z3E8               | 0.092955025 | 0   | 0   | 2   | 0   | 0    | 5   | 8   | 4   | Putative helicase MOV-10 OS-Mus musculus GN=Mov10 PE=1 SV=1                                             |
| Q8T0T6               | 0.039440948 | 2   | 5   | 5   | 0   | 16   | 7   | 10  | 12  | Elongation factor 1-delta OS-Mus musculus GN=Eef1d PE=1 SV=1                                            |
| P57F76               | 0.039440948 | 2   | 5   | 5   | 0   | 16   | 7   | 10  | 12  | Elongation factor 1-delta OS-Mus musculus GN=Eef1d PE=1 SV=2                                            |
| AA0AR4J1E2           | 0.039440948 | 2   | 5   | 5   | 0   | 16   | 7   | 10  | 12  | Elongation factor 1-delta OS-Mus musculus GN=Eef1d PE=1 SV=1                                            |
| Q8VHM5               | 0.682030757 | 0   | 0   | 5   | 0   | 14   | 0   | 0   | 0   | Heterogeneous nuclear ribonucleoprotein R OS-Mus musculus GN=HnrnpR PE=1 SV=1                           |
| G3UXK0               | 0.794207453 | 3   | 0   | 2   | 0   | 0    | 7   | 0   | 0   | Dystrorubin OS-Mus musculus GN=Dmb PE=1 SV=1                                                            |
| G3UY34               | 0.794207453 | 3   | 0   | 2   | 0   | 0    | 7   | 0   | 0   | Dystrorubin beta OS-Mus musculus GN=Dmb PE=1 SV=1                                                       |
| G3UZJ3               | 0.794207453 | 3   | 0   | 2   | 0   | 0    | 7   | 0   | 0   | Dystrorubin beta OS-Mus musculus GN=Dmb PE=1 SV=1                                                       |
| Q88477               | 0.003378692 | 5   | 2   | 3   | 0   | 15   | 10  | 7   | 5   | Insulin-like growth factor 2 mRNA-binding protein 1 OS-Mus musculus GN=Igf2bp1 PE=1 SV=1                |
| P13234               | 0.231314288 | 4   | 3   | 2   | 0   | 9    | 6   | 0   | 0   | 6 cAMP-dependent protein kinase type II-beta regulatory subunit OS-Mus musculus GN=Pkar2b PE=1 SV=3     |
| P19324               | 0.011396807 | 13  | 8   | 10  | 33  | 30   | 10  | 20  | 28  | Serpin H1 OS-Mus musculus GN=Serh1 PE=1 SV=3                                                            |
| Q8YB99               | 0.017839346 | 11  | 8   | 8   | 2   | 18   | 20  | 17  | 25  | Choline transporter-like protein 2 OS-Mus musculus GN=Slc44a2 PE=1 SV=2                                 |
| Q920E5               | 0.008539605 | 0   | 0   | 2   | 0   | 8    | 5   | 6   | 3   | Farnesyl pyrophosphate synthase OS-Mus musculus GN=Fdps PE=1 SV=1                                       |
| E9Q808               | 0.038124294 | 2   | 5   | 5   | 0   | 15   | 7   | 10  | 12  | Elongation factor 1-delta (Fragment) OS-Mus musculus GN=Eef1d PE=1 SV=1                                 |
| P61028               | 0.307377623 | 0   | 0   | 0   | 0   | 0    | 0   | 0   | 0   | Protein Ubiquitin Rbx-8 OS-Mus musculus GN=Rbx8 PE=1 SV=1                                               |
| P16045               | 0.016281761 | 62  | 21  | 51  | 5   | 100  | 84  | 83  | 111 | Galectin-1 OS-Mus musculus GN=Lgal3 PE=1 SV=3                                                           |
| Q924C6               | 0.358213982 | 2   | 2   | 3   | 0   | 8    | 3   | 0   | 0   | 8 Lysyl oxidase homolog 4 OS-Mus musculus GN=Lox4 PE=2 SV=2                                             |
| E9Q600               | 0.358213982 | 2   | 2   | 3   | 0   | 8    | 3   | 0   | 0   | 8 Lysyl oxidase homolog 4 OS-Mus musculus GN=Lox4 PE=1 SV=1                                             |
| P05132               | 0.033724025 | 2   | 2   | 5   | 0   | 9    | 13  | 6   | 8   | 6 cAMP-dependent protein kinase catalytic subunit alpha OS-Mus musculus GN=Pkaa PE=1 SV=3               |
| E9QNP0               | 0.945834642 | 0   | 0   | 4   | 0   | 0    | 0   | 12  | 0   | KDEL motif-containing protein 1 OS-Mus musculus GN=Kdel1 PE=1 SV=1                                      |
| E9Q616               | 0.014783589 | 29  | 25  | 21  | 14  | 54   | 53  | 51  | 81  | Protein Ahnak OS-Mus musculus GN=Ahnak PE=1 SV=1                                                        |
| P62746               | 0.81142792  | 4   | 3   | 2   | 4   | 9    | 7   | 0   | 0   | Rho-related GTP-binding protein RhoB OS-Mus musculus GN=RhoB PE=1 SV=1                                  |
| Q60790               | 0.594717038 | 0   | 3   | 0   | 0   | 0    | 0   | 8   | 0   | Ras GTPase-activating protein 3 OS-Mus musculus GN=Ras3 PE=1 SV=2                                       |
| P62043               | 0.061974367 | 0   | 0   | 0   | 0   | 0    | 0   | 0   | 0   | Large multidomain body protein 6 OS-Mus musculus GN=Ctpep PE=1 SV=2                                     |
| BI4AZ2               | 0.061974367 | 0   | 0   | 0   | 0   | 0    | 0   | 0   | 0   | Charged multivesicular body protein 6 (Fragment) OS-Mus musculus GN=Champ6 PE=1 SV=1                    |
| Q6P117               | 0.175724708 | 0   | 0   | 2   | 0   | 7    | 5   | 0   | 0   | Metalloproteinase inhibitor 2 OS-Mus musculus GN=Timp2 PE=1 SV=1                                        |
| P25785               | 0.175724708 | 0   | 0   | 2   | 0   | 7    | 5   | 0   | 0   | Metalloproteinase inhibitor 2 OS-Mus musculus GN=Timp2 PE=1 SV=2                                        |
| Q9J280               | 0.004781852 | 8   | 2   | 4   | 0   | 16   | 12  | 12  | 12  | Acetyl-CoA synthetase OS-Mus musculus GN=Aacs PE=1 SV=1                                                 |
| P13020               | 0.000191089 | 21  | 15  | 18  | 5   | 46   | 38  | 29  | 43  | Gelsolin OS-Mus musculus GN=Gsn PE=1 SV=3                                                               |
| D3YU09               | 0.000167805 | 2   | 0   | 5   | 0   | 12   | 7   | 9   | 9   | Elongation factor 1-delta (Fragment) OS-Mus musculus GN=Eef1d PE=1 SV=8                                 |
| Q01768               | 0.014502381 | 22  | 20  | 22  | 2   | 48   | 38  | 39  | 49  | Nucleoside diphosphate kinase B OS-Mus musculus GN=Nme2 PE=1 SV=1                                       |
| Q922H4               | 0.37927905  | 0   | 4   | 4   | 0   | 0    | 7   | 0   | 0   | 55 Manyfold phosphatase alpha OS-Mus musculus GN=Gmpaa PE=1 SV=1                                        |
| E9P250               | 0.022298686 | 22  | 25  | 23  | 3   | 52   | 40  | 44  | 55  | Nucleoside diphosphate kinase OS-Mus musculus GN=Gm20390 PE=3 SV=1                                      |
| P97427               | 0.00916954  | 8   | 3   | 8   | 0   | 19   | 18  | 12  | 16  | Dihydropyrimidinase-related protein 1 OS-Mus musculus GN=Cmp1 PE=1 SV=1                                 |
| Z4YK85               | 0.426526658 | 41  | 31  | 43  | 5   | 94   | 72  | 51  | 62  | Agrin OS-Mus musculus GN=Agrn PE=1 SV=1                                                                 |
| E9Q687               | 0.002240697 | 0   | 0   | 0   | 0   | 0    | 0   | 0   | 0   | Protein Ubr OS-Mus musculus GN=Ubrn PE=1 SV=1                                                           |
| P68037               | 0.004129713 | 2   | 3   | 0   | 0   | 8    | 8   | 5   | 4   | Ubiquitin-conjugating enzyme E2 L3 OS-Mus musculus GN=Ube2l3 PE=1 SV=1                                  |
| Q6P5F7               | 0.014585274 | 2   | 3   | 0   | 0   | 7    | 6   | 5   | 7   | Protein tweety homolog 3 OS-Mus musculus GN=Tyh3 PE=1 SV=1                                              |
| E9QNH6               | 0.025887518 | 0   | 2   | 2   | 0   | 4    | 6   | 3   | 7   | Unconventional myosin-1b OS-Mus musculus GN=Myo1b PE=1 SV=1                                             |
| E9Q560               | 0.025887518 | 0   | 2   | 2   | 0   | 4    | 6   | 3   | 7   | Unconventional myosin-1b OS-Mus musculus GN=Myo1b PE=1 SV=1                                             |
| P46735               | 0.025887518 | 0   | 2   | 2   | 0   | 4    | 6   | 3   | 7   | Unconventional myosin-1b OS-Mus musculus GN=Myo1b PE=1 SV=3                                             |
| Q7TQD7               | 0.025887518 | 0   | 2   | 2   | 0   | 4    | 6   | 3   | 7   | Myo1b protein OS-Mus musculus GN=Myo1b PE=1 SV=1                                                        |
| Q9CR16               | 0.038302929 | 12  | 8   | 8   | 6   | 31   | 16  | 14  | 24  | Peptidyl-prolyl cis-trans isomerase D OS-Mus musculus GN=Ppid PE=1 SV=3                                 |
| Q8BF16               | 0.18372868  | 2   | 0   | 0   | 0   | 0    | 0   | 0   | 0   | 4 Keratin, type I OS-Mus musculus GN=Krt1 PE=1 SV=1                                                     |
| P47199               | 0.718096995 | 0   | 0   | 2   | 0   | 5    | 0   | 0   | 0   | Quinone oxidoreductase OS-Mus musculus GN=Cryz PE=1 SV=1                                                |
| P50543               | 0.895562203 | 2   | 0   | 2   | 0   | 0    | 0   | 0   | 0   | 5 Protein S100-A11 OS-Mus musculus GN=S100a11 PE=1 SV=1                                                 |
| Q05793               | 0.009005813 | 400 | 325 | 327 | 143 | 983  | 731 | 531 | 695 | Basement membrane-specific heparan sulfate proteoglycan core protein OS-Mus musculus GN=Happ2 PE=1 SV=1 |
| E9Q703               | 0.084423853 | 0   | 0   | 27  | 13  | 61   | 51  | 41  | 43  | Tropomyosin alpha-3 chain OS-Mus musculus GN=Tpm3 PE=1 SV=1                                             |
| A2ASQ1               | 1.2972845   | 0   | 0   | 30  | 2   | 5    | 9   | 7   | 1   | Agrin OS-Mus musculus GN=Agrn PE=1 SV=1                                                                 |
| P61079               | 0.193881582 | 0   | 0   | 3   | 0   | 7    | 9   | 0   | 0   | Ubiquitin-conjugating enzyme E2 D3 OS-Mus musculus GN=Ube2d3 PE=1 SV=1                                  |
| AA0AG2KGL0           | 0.193881582 | 0   | 0   | 3   | 0   | 7    | 9   | 0   | 0   | Ubiquitin-conjugating enzyme E2 D3 OS-Mus musculus GN=Ube2d3 PE=1 SV=1                                  |
| AA0AG2E32            | 0.193881582 | 0   | 0   | 3   | 0   | 7    | 9   | 0   | 0   | Ubiquitin-conjugating enzyme E2 D3 (Fragment) OS-Mus musculus GN=Ube2d3 PE=1 SV=1                       |
| M0CWP1               | 0.000307749 | 44  | 32  | 44  | 5   | 98   | 72  | 66  | 64  | Agrin OS-Mus musculus GN=Agrn PE=1 SV=1                                                                 |
| Q08553               | 0.044363487 | 45  | 34  | 36  | 4   | 91   | 81  | 34  | 83  | Dihydropyrimidinase-related protein 2 OS-Mus musculus GN=Dpya2 PE=1 SV=2                                |
| Q6NXH9               | 0.842948403 | 0   | 0   | 0   | 7   | 22   | 12  | 0   | 0   | Keratin, type II cytoskeletal 73 OS-Mus musculus GN=Krt73 PE=1 SV=1                                     |
| BI1B0C7              | 0.005774716 | 470 | 369 | 367 | 154 | 1009 | 802 | 577 | 780 | Basement membrane-specific heparan sulfate proteoglycan core protein OS-Mus musculus GN=Happ2 PE=1 SV=1 |
| Q9JBB4               | 0.005280243 | 50  | 40  | 18  | 14  | 88   | 78  | 49  | 105 | Phosphoserine phosphatase OS-Mus musculus GN=Rhoc PE=1 SV=3                                             |
| Q5SF07               | 0.023864489 | 6   | 2   | 4   | 0   | 10   | 12  | 7   | 9   | Insulin-like growth factor 2 mRNA-binding protein 2 OS-Mus musculus GN=Igf2bp2 PE=1 SV=1                |
| E9PZ16               | 0.006178147 | 480 | 373 | 373 | 159 | 1100 | 808 | 579 | 792 | Basement membrane-specific heparan sulfate proteoglycan core protein OS-Mus musculus GN=Happ2 PE=1 SV=1 |
| P27773               | 0.01867859  | 6   | 5   | 8   | 2   | 14   | 14  | 8   | 13  | Protein disulfide-isomerase A3 OS-Mus musculus GN=Pdia3 PE=1 SV=2                                       |
| Q95108               | 0.648561657 | 3   | 0   | 0   | 0   | 0    | 0   | 0   | 0   | Capsin-2 OS-Mus musculus GN=Cpsn2 PE=1 SV=1                                                             |
| contaminant_INT-STD1 | 0.071376531 | 397 | 290 | 364 | 270 | 775  | 728 | 643 | 932 | BSA                                                                                                     |
| P11679               | 0.244340789 | 20  | 14  | 20  | 10  | 37   | 0   | 0   | 0   | Keratin, type II cytoskeletal 8 OS-Mus musculus GN=Krt8 PE=1 SV=4                                       |
| Q9P184               | 0.668787847 | 7   | 4   | 4   | 3   | 13   | 8   | 0   | 0   | Capping protein (Actin filament), gelolin-like OS-Mus musculus GN=Capg PE=1 SV=1                        |
| P40124               | 0.044782459 | 38  | 4   | 4   | 0   | 7    | 9   | 0   | 0   | 50 Adenoviral-associated protein 1 OS-Mus musculus GN=Acap1 PE=1 SV=4                                   |
| Q8BU31               | 0.271381953 | 0   | 0   | 2   | 0   | 4    | 6   | 0   | 0   | Ras-related protein Rap-2 OS-Mus musculus GN=Rap2 PE=1 SV=1                                             |
| AE6X8Z3              | 0.024269418 | 6   | 2   | 4   | 0   | 10   | 12  | 7   | 7   | Insulin-like growth factor 2 mRNA-binding protein 2 OS-Mus musculus GN=Igf2bp2 PE=1 SV=1                |
| P70349               | 0.027930054 | 4   | 6   | 8   | 0   | 22   | 12  | 12  | 10  | Histidine triad nucleotide-binding protein 1 OS-Mus musculus GN=Hnat1 PE=1 SV=3                         |
| Q62159               | 0.009530461 | 23  | 40  | 13  | 49  | 49   | 29  | 19  | 32  | Rho-related GTP-binding protein RhoC OS-Mus musculus GN=Rhoc PE=1 SV=2                                  |
| E9QPP9               | 0.68610885  | 0   | 0   | 2   | 13  | 0    | 0   | 0   | 0   | Serpin B6 (Fragment) OS-Mus musculus GN=Serpb6a PE=1 SV=1                                               |
| P26043               | 0.01477506  | 51  | 41  | 38  | 10  | 86   | 78  | 74  | 72  | Radinix OS-Mus musculus GN=Rdx PE=1 SV=3                                                                |
| F7B585               | 0.335266818 | 6   | 3   | 5   | 0   | 14   | 7   | 0   | 0   | Protein HnnpR OS-Mus musculus GN=HnnpR PE=1 SV=1                                                        |
| P26039               | 0.017462765 | 27  | 23  | 28  | 8   | 41   | 30  | 5   | 5   | Talin-1 OS-Mus musculus GN=Talin1 PE=1 SV=2                                                             |
| K3V4R2               | 0.860016103 | 0   | 9   | 6   | 4   | 20   | 8   | 0   | 0   | Myosin-14 OS-Mus musculus GN=Myh14 PE=1 SV=1                                                            |
| Q9R0P5               | 0.022736054 | 14  | 11  | 0   | 3   | 29   | 23  | 18  | 14  | Destrin OS-Mus musculus GN=Dsn PE=1 SV=3                                                                |
| K7E6F1               | 0.65198429  | 8   | 0   | 0   | 2   | 14   | 8   | 0   | 0   | 0 Serpin B6 (Fragment) OS-Mus musculus GN=Serpb6a PE=1 SV=1                                             |
| Q9JWDM3              | 0.050922558 | 13  | 6   | 10  | 0   | 16   | 27  | 18  | 24  | Coronin-1B OS-Mus musculus GN=Coro1b PE=1 SV=1                                                          |
| Q924B0               | 0.064348852 | 4   | 3   | 5   | 0   | 14   | 8   | 4   | 9   | Impa1 OS-Mus musculus GN=Impa1 PE=1 SV=1                                                                |
| Q8QJ22               | 0.064348852 | 4   | 3   | 5   | 0   | 14   | 8   | 4   | 9   | Impa1 protein OS-Mus musculus GN=Impa1 PE=1 SV=1                                                        |
| Q9P147               | 0.016949415 | 12  | 14  | 6   | 3   | 23   | 19  | 13  | 21  | Hsc70-interacting protein OS-Mus musculus GN=Hsc70 IP=1 SV=1                                            |
| Q8RC37               | 0.112306242 | 0   | 0   | 0   | 0   | 9    | 8   | 9   | 0   | 0 DEAD (Asp-Glu-Ala-Asp) box polypeptide 19b OS-Mus musculus GN=Ddx19b PE=1 SV=1                        |
| D3Z3B8               | 0.206145048 | 8   | 7   | 6   | 0   | 9    | 8   | 0   | 0   | Dkk1 OS-Mus musculus GN=Dkk1 PE=1 SV=1                                                                  |
| P14824               | 0.000780295 | 123 | 76  | 95  | 31  | 212  | 169 | 122 | 199 | Annexin A6 OS-Mus musculus GN=Anxa6 PE=1 SV=3                                                           |
| D3Z618               | 0.07307509  | 26  | 25  | 27  | 13  | 61   | 51  | 41  | 43  | Tropomyosin alpha-3 chain OS-Mus musculus GN=Tpm3 PE=1 SV=1                                             |
| Q8C253               | 0.057682834 | 26  | 13  | 17  | 3   | 32   | 41  | 21  | 21  | 33 Galectin OS-Mus musculus GN=Lgal3 PE=1 SV=1                                                          |
| G3UYZ1               | 0.056359463 | 0   | 5   | 0   | 0   | 14   | 6   | 11  | 12  | Immunoglobulin superfamily member 8 OS-Mus musculus GN=Igsf8 PE=1 SV=1                                  |
| Q8R366               | 0.056359463 | 0   | 5   | 0   | 0   | 14   | 6   | 11  | 12  | Immunoglobulin superfamily member 8 OS-Mus musculus GN=Igsf8 PE=1 SV=2                                  |
| AA0AR4J117           | 0.056359463 | 0   | 5   | 0   | 0   | 14   | 6   | 11  | 12  | Immunoglobulin superfamily member 8 OS-Mus musculus GN=Igsf8 PE=1 SV=1                                  |
| Q7PZ21               | 0.484429974 | 3   | 2   | 2   | 0   | 5    | 0   | 0   | 0   | 0 MCC140784 OS-Mus musculus GN=Try10 PE=1 SV=1                                                          |
| Q9JY91               | 0.01035368  | 31  | 23  | 27  | 5   | 57   | 46  | 4   | 35  | Agrin OS-Mus musculus GN=Agrn PE=1 SV=1                                                                 |
| Q8Y224               | 0.1629925   |     |     |     |     |      |     |     |     |                                                                                                         |

|                       |             |     |     |     |    |     |     |     |     |                                                                                                             |
|-----------------------|-------------|-----|-----|-----|----|-----|-----|-----|-----|-------------------------------------------------------------------------------------------------------------|
| 055131                | 0.10071421  | 28  | 22  | 34  | 7  | 63  | 39  | 36  | 41  | Septin-7 OS-Mus musculus GN=Sept7 PE=1 SV=1                                                                 |
| E9Q1G8                | 0.10174121  | 28  | 22  | 34  | 7  | 63  | 39  | 36  | 41  | Septin-7 OS-Mus musculus GN=Sept7 PE=1 SV=2                                                                 |
| E9Q2F5                | 0.10174121  | 28  | 22  | 34  | 7  | 63  | 39  | 36  | 41  | Septin-7 OS-Mus musculus GN=Sept7 PE=1 SV=2                                                                 |
| E9P348                | 0.034680111 | 6   | 2   | 5   | 0  | 8   | 9   | 8   | 9   | Dedicator of cytokinesis protein 7 OS-Mus musculus GN=Dock7 PE=1 SV=2                                       |
| Q9CWC8                | 0.160833804 | 4   | 6   | 6   | 3  | 12  | 9   | 6   | 10  | Sorting nexin-2 OS-Mus musculus GN=Snx2 PE=1 SV=2                                                           |
| D3Z5M7                | 0.769789584 | 5   | 6   | 3   | 5  | 17  | 7   | 5   | 8   | Peroxidase homolog OS-Mus musculus GN=Pxdn PE=1 SV=1                                                        |
| FCZAZ6                | 0.055925033 | 21  | 20  | 35  | 0  | 40  | 45  | 24  | 37  | Factin-capping protein subunit beta (Fragment) OS-Mus musculus GN=Ccapb PE=1 SV=1                           |
| Q9RKF1                | 0.075501963 | 5   | 22  | 29  | 5  | 54  | 34  | 22  | 16  | Ras GTPase-activating-like protein IQGAP1 OS-Mus musculus GN=Iqgap1 PE=1 SV=2                               |
| A2APM3                | 0.029385921 | 5   | 5   | 7   | 0  | 14  | 10  | 8   | 12  | CD44 antigen OS-Mus musculus GN=CD44 PE=1 SV=1                                                              |
| A2APM4                | 0.029385921 | 5   | 5   | 7   | 0  | 14  | 10  | 8   | 12  | CD44 antigen OS-Mus musculus GN=CD44 PE=1 SV=1                                                              |
| A2APM2                | 0.029385921 | 5   | 5   | 7   | 0  | 14  | 10  | 8   | 12  | CD44 antigen OS-Mus musculus GN=CD44 PE=1 SV=1                                                              |
| E9QK88                | 0.029385921 | 5   | 5   | 7   | 0  | 14  | 10  | 8   | 12  | CD44 antigen OS-Mus musculus GN=CD44 PE=1 SV=1                                                              |
| Q3US51                | 0.029385921 | 5   | 5   | 7   | 0  | 14  | 10  | 8   | 12  | CD44 antigen OS-Mus musculus GN=CD44 PE=1 SV=1                                                              |
| Q9XCW3                | 0.399917211 | 7   | 3   | 5   | 0  | 9   | 12  | 0   | 8   | Calcyclin-binding protein OS-Mus musculus GN=Cacypb PE=1 SV=1                                               |
| P05064                | 0.026302261 | 65  | 75  | 60  | 26 | 133 | 113 | 84  | 105 | Fructose-bisphosphate aldolase A OS-Mus musculus GN=Aldoa PE=1 SV=2                                         |
| A2AMH3                | 0.296909448 | 4   | 0   | 4   | 0  | 8   | 8   | 0   | 7   | Choline transporter-like protein 1 OS-Mus musculus GN=Slc44a1 PE=1 SV=1                                     |
| A2AMH4                | 0.296909448 | 4   | 0   | 4   | 0  | 8   | 8   | 0   | 7   | Choline transporter-like protein 1 OS-Mus musculus GN=Slc44a1 PE=1 SV=1                                     |
| Q6X893                | 0.385119773 | 4   | 4   | 4   | 0  | 8   | 8   | 0   | 7   | Choline transporter-like protein 1 OS-Mus musculus GN=Slc44a1 PE=1 SV=3                                     |
| Q9RC57                | 0.101399706 | 9   | 5   | 6   | 0  | 15  | 13  | 11  | 12  | 60S ribosomal protein L14 OS-Mus musculus GN=Rpl14 PE=1 SV=3                                                |
| Q3V918                | 0.061536962 | 7   | 5   | 8   | 0  | 15  | 12  | 8   | 16  | Heterogeneous nuclear ribonucleoprotein Q OS-Mus musculus GN=Synrnp PE=1 SV=1                               |
| A0A0R4J259            | 0.061536962 | 7   | 5   | 8   | 0  | 15  | 12  | 8   | 16  | Heterogeneous nuclear ribonucleoprotein Q OS-Mus musculus GN=Synrnp PE=1 SV=1                               |
| G3UZ12                | 0.061536962 | 7   | 5   | 8   | 0  | 15  | 12  | 8   | 16  | Heterogeneous nuclear ribonucleoprotein Q OS-Mus musculus GN=Synrnp PE=1 SV=1                               |
| Q7TMK9                | 0.061536962 | 7   | 5   | 8   | 0  | 15  | 12  | 8   | 16  | Heterogeneous nuclear ribonucleoprotein Q OS-Mus musculus GN=Synrnp PE=1 SV=2                               |
| Q9P131                | 0.274581224 | 3   | 3   | 5   | 0  | 8   | 8   | 0   | 6   | Glutathione S-transferase omega-1 OS-Mus musculus GN=Gsta1 PE=1 SV=2                                        |
| Q8K1M3                | 0.428124176 | 3   | 4   | 3   | 0  | 8   | 5   | 0   | 6   | Protein kinase, cAMP dependent regulatory, type II alpha OS-Mus musculus GN=Pkar2a PE=1 SV=1                |
| A0A0A6YX73            | 0.428124176 | 3   | 4   | 3   | 0  | 8   | 5   | 0   | 6   | cAMP-dependent protein kinase type II-alpha regulatory subunit OS-Mus musculus GN=Pkar2a PE=1 SV=1          |
| A2APM1                | 0.022903385 | 5   | 5   | 7   | 0  | 14  | 10  | 8   | 11  | CD44 antigen OS-Mus musculus GN=CD44 PE=1 SV=1                                                              |
| Q9T076                | 0.095121234 | 18  | 16  | 16  | 4  | 25  | 22  | 16  | 12  | Annexin A2 OS-Mus musculus GN=Anxa2 PE=1 SV=1                                                               |
| Q9CQ65                | 0.057505843 | 26  | 17  | 24  | 3  | 43  | 37  | 19  | 33  | S-methyl-5'-thioadenosine phosphorylase OS-Mus musculus GN=Mtap PE=1 SV=1                                   |
| E9PY90                | 0.973780872 | 6   | 5   | 4   | 2  | 10  | 5   | 0   | 9   | Serpin B6 (Fragment) OS-Mus musculus GN=Serpinb6 PE=1 SV=1                                                  |
| P43377                | 0.096253019 | 19  | 11  | 16  | 0  | 26  | 28  | 20  | 41  | Aldose reductase-related protein 2 OS-Mus musculus GN=Akr18 PE=1 SV=2                                       |
| G3JZ48                | 0.082836467 | 19  | 11  | 16  | 0  | 26  | 28  | 20  | 41  | Heterogeneous nuclear ribonucleoprotein Q OS-Mus musculus GN=Synrnp PE=1 SV=1                               |
| H8BKD0                | 0.738681855 | 0   | 0   | 28  | 3  | 0   | 30  | 0   | 28  | Heterogeneous nuclear ribonucleoprotein K (Fragment) OS-Mus musculus GN=Hnmpk PE=1 SV=1                     |
| P15646                | 0.021822929 | 21  | 12  | 18  | 3  | 29  | 26  | 19  | 27  | Spectrin alpha chain, non-erythrocytic 1 OS-Mus musculus GN=Sptan1 PE=1 SV=4                                |
| contaminant_KERATIN8  | 0.159079157 | 21  | 12  | 18  | 4  | 46  | 41  | 24  | 16  | no description                                                                                              |
| P14211                | 0.046847509 | 9   | 7   | 18  | 4  | 18  | 10  | 4   | 15  | Calcitriol OS-Mus musculus GN=Calc PE=1 SV=1                                                                |
| E9Q539                | 0.206151137 | 20  | 24  | 24  | 13 | 44  | 43  | 28  | 32  | Tropomyosin alpha-3 chain OS-Mus musculus GN=Tpm3 PE=1 SV=1                                                 |
| P14069                | 0.00893839  | 31  | 24  | 30  | 6  | 56  | 41  | 40  | 36  | Protein S100-A6 OS-Mus musculus GN=S100a6 PE=1 SV=3                                                         |
| 054962                | 0.316121859 | 6   | 5   | 6   | 3  | 14  | 10  | 5   | 8   | Barrier-to-autointegration factor OS-Mus musculus GN=Banf1 PE=1 SV=1                                        |
| Q9R090                | 0.078833087 | 0   | 0   | 2   | 0  | 4   | 4   | 3   | 5   | Ubiquitin carboxyl-terminal hydrolase isozyme L1 OS-Mus musculus GN=Uchl1 PE=1 SV=1                         |
| P61759                | 0.087386179 | 2   | 0   | 0   | 0  | 4   | 3   | 0   | 4   | Protein subunit 3 OS-Mus musculus GN=Pp3 PE=1 SV=2                                                          |
| Q5XV19                | 0.569012531 | 0   | 0   | 0   | 2  | 4   | 3   | 0   | 4   | Costomer subunit delta OS-Mus musculus GN=Aren1 PE=1 SV=2                                                   |
| Q8ZVZ7                | 0.028675804 | 2   | 0   | 4   | 0  | 7   | 6   | 4   | 5   | N-acetylglucosaminase-6-phosphate decetylase OS-Mus musculus GN=Amdhd2 PE=1 SV=1                            |
| Q9XC00                | 0.301214949 | 0   | 0   | 2   | 3  | 9   | 10  | 7   | 8   | 18T1 homolog OS-Mus musculus GN=18t1 PE=1 SV=1                                                              |
| Q9CAAAAY91            | 0.02760317  | 0   | 0   | 4   | 0  | 6   | 6   | 6   | 8   | Neurocell adhesion molecule protein 1 (Fragment) OS-Mus musculus GN=Ncam1 PE=1 SV=1                         |
| P21107                | 0.300128128 | 19  | 23  | 23  | 13 | 42  | 40  | 26  | 33  | Tropomyosin alpha-3 chain OS-Mus musculus GN=Tpm3 PE=1 SV=1                                                 |
| Q6Z261                | 0.077187588 | 28  | 26  | 18  | 14 | 43  | 47  | 35  | 48  | Spectrin beta chain, non-erythrocytic 1 OS-Mus musculus GN=Sptbn1 PE=1 SV=2                                 |
| Q02013                | 0.48020386  | 4   | 3   | 3   | 0  | 7   | 4   | 0   | 7   | 7 Aquaporin-1 OS-Mus musculus GN=Aqp1 PE=1 SV=3                                                             |
| G3JZW7                | 0.645309458 | 0   | 0   | 3   | 0  | 0   | 0   | 0   | 3   | Protein mago nashi homolog 2 OS-Mus musculus GN=Magozhb PE=4 SV=1                                           |
| Q9Z2K1                | 0.27577977  | 9   | 7   | 17  | 2  | 23  | 22  | 10  | 8   | Keratin, type I cytoskeletal 16 OS-Mus musculus GN=Krt16 PE=1 SV=3                                          |
| B7ZCP4                | 0.516085314 | 3   | 2   | 0   | 0  | 6   | 0   | 3   | 0   | Copine-1 OS-Mus musculus GN=Cpne1 PE=1 SV=1                                                                 |
| Q9P9F3                | 0.899096938 | 0   | 5   | 0   | 0  | 9   | 0   | 0   | 0   | Keratin, type II cuticular Hb4 OS-Mus musculus GN=Krt84 PE=2 SV=2                                           |
| Q5V5G4                | 0.154426357 | 8   | 5   | 10  | 4  | 10  | 13  | 0   | 12  | AP-1 complex subunit beta OS-Mus musculus GN=Ap1b1 PE=1 SV=1                                                |
| 05SV65                | 0.154426357 | 8   | 5   | 10  | 0  | 10  | 13  | 0   | 12  | AP-1 complex subunit beta-1 OS-Mus musculus GN=Ap1b1 PE=1 SV=1                                              |
| Q3U4W8                | 0.196794507 | 9   | 6   | 15  | 3  | 17  | 12  | 9   | 21  | Ubiquitinyl hydrolase 1 OS-Mus musculus GN=Usp5 PE=1 SV=1                                                   |
| P56399                | 0.196794507 | 9   | 6   | 15  | 3  | 17  | 12  | 9   | 21  | Ubiquitin carboxyl-terminal hydrolase 5 OS-Mus musculus GN=Usp5 PE=1 SV=1                                   |
| Q3TTF5                | 0.590515307 | 12  | 5   | 20  | 2  | 20  | 18  | 0   | 14  | Keratin, type II cytoskeletal 2 epidermal OS-Mus musculus GN=Krt2 PE=1 SV=1                                 |
| Q8VL16                | 0.035439802 | 11  | 7   | 12  | 2  | 13  | 15  | 15  | 14  | Splicing factor, proline- and glutamine-rich OS-Mus musculus GN=Sfpq PE=1 SV=1                              |
| A2AMH5                | 0.433224961 | 4   | 5   | 4   | 0  | 8   | 8   | 0   | 7   | Choline transporter-like protein 1 OS-Mus musculus GN=Slc44a1 PE=1 SV=1                                     |
| P56480                | 0.501156992 | 5   | 3   | 5   | 0  | 12  | 5   | 0   | 6   | ATP synthase subunit beta, mitochondrial OS-Mus musculus GN=Atp5b PE=1 SV=2                                 |
| P68181                | 0.240893822 | 0   | 0   | 0   | 0  | 0   | 0   | 0   | 9   | Nucleolar ribonucleoprotein catalytic subunit beta OS-Mus musculus GN=Pnacb PE=1 SV=2                       |
| Q3TMX0                | 0.089179587 | 16  | 14  | 0   | 4  | 24  | 16  | 12  | 28  | MCCK4375, isoform CRA_b OS-Mus musculus GN=Scdbp PE=1 SV=1                                                  |
| F6R1V7                | 0.978609728 | 6   | 4   | 7   | 0  | 11  | 0   | 0   | 0   | 9 Serine/threonine-protein phosphatase 2A 55 kDa regulatory subunit B OS-Mus musculus GN=Ppp2r2d PE=1 SV=2  |
| contaminant_KERATIN20 | 0.529319647 | 14  | 15  | 19  | 10 | 38  | 23  | 24  | 17  | no description                                                                                              |
| B7ZC10                | 0.001425764 | 0   | 2   | 4   | 0  | 7   | 6   | 4   | 4   | Abi1 interactor 1 OS-Mus musculus GN=Abi1 PE=1 SV=1                                                         |
| B7ZC12                | 0.001425764 | 0   | 2   | 4   | 0  | 7   | 6   | 4   | 4   | Abi1 interactor 1 OS-Mus musculus GN=Abi1 PE=1 SV=1                                                         |
| B7ZC13                | 0.001425764 | 0   | 2   | 4   | 0  | 7   | 6   | 4   | 4   | Abi1 interactor 1 OS-Mus musculus GN=Abi1 PE=1 SV=1                                                         |
| B7ZC14                | 0.001425764 | 0   | 2   | 4   | 0  | 7   | 6   | 4   | 4   | Abi1 interactor 1 OS-Mus musculus GN=Abi1 PE=1 SV=1                                                         |
| B7ZC15                | 0.001425764 | 0   | 2   | 4   | 0  | 7   | 6   | 4   | 4   | Abi1 interactor 1 OS-Mus musculus GN=Abi1 PE=1 SV=1                                                         |
| Q8CBW3                | 0.001425764 | 0   | 2   | 4   | 0  | 7   | 6   | 4   | 4   | Abi1 interactor 1 OS-Mus musculus GN=Abi1 PE=1 SV=1                                                         |
| J3QNK8                | 0.001425764 | 0   | 2   | 4   | 0  | 7   | 6   | 4   | 4   | Abi1 interactor 1 OS-Mus musculus GN=Abi1 PE=1 SV=1                                                         |
| 088783                | 0.217537216 | 0   | 0   | 2   | 0  | 4   | 4   | 3   | 0   | Coagulation factor V OS-Mus musculus GN=F5 PE=1 SV=1                                                        |
| A0A0ADMQ02            | 0.115025548 | 28  | 26  | 27  | 14 | 41  | 44  | 33  | 46  | Spectrin beta chain, non-erythrocytic 1 (Fragment) OS-Mus musculus GN=Sptbn1 PE=1 SV=1                      |
| contaminant_KERATIN02 | 0.840115452 | 43  | 51  | 96  | 45 | 210 | 104 | 39  | 56  | no description                                                                                              |
| Q9DAS9                | 0.105946732 | 4   | 4   | 8   | 6  | 10  | 8   | 13  | 13  | Guanine nucleotide-binding protein (G1/G13/G10) subunit gamma-12 OS-Mus musculus GN=Gng12 PE=1 SV=3         |
| P61205                | 0.066086698 | 20  | 12  | 9   | 4  | 22  | 18  | 13  | 25  | ADP-ribosylation factor 3 OS-Mus musculus GN=Arf3 PE=2 SV=2                                                 |
| Q6Z267                | 0.090491295 | 18  | 10  | 9   | 4  | 23  | 14  | 16  | 18  | 60S ribosomal protein L17 OS-Mus musculus GN=Rpl17 PE=1 SV=1                                                |
| contaminant_KERATIN14 | 0.734712602 | 7   | 4   | 12  | 6  | 20  | 15  | 14  | 17  | no description                                                                                              |
| Q6ZV33                | 0.418762282 | 13  | 14  | 10  | 6  | 30  | 15  | 14  | 15  | 60S ribosomal protein L10 OS-Mus musculus GN=Rpl10 PE=1 SV=3                                                |
| Q9WUD1                | 0.112135376 | 2   | 0   | 5   | 0  | 5   | 9   | 4   | 6   | STIPI1 homology and U box-containing protein 1 OS-Mus musculus GN=Stnbl1 PE=1 SV=1                          |
| P15331                | 0.34114082  | 0   | 4   | 3   | 0  | 7   | 6   | 0   | 5   | Peripherin OS-Mus musculus GN=Pph PE=1 SV=2                                                                 |
| S4R1T4                | 0.831957707 | 0   | 0   | 4   | 0  | 4   | 3   | 0   | 18  | Keratin, type II cytoskeletal 2 epidermal OS-Mus musculus GN=Krt2 PE=1 SV=1                                 |
| Q9EX55                | 0.032023431 | 11  | 10  | 11  | 0  | 22  | 15  | 18  | 18  | HACCA ribonucleoprotein complex subunit 4 OS-Mus musculus GN=Dkel1 PE=1 SV=4                                |
| Q9CP84                | 0.027603605 | 18  | 10  | 9   | 4  | 23  | 14  | 15  | 18  | 60S ribosomal protein L17 OS-Mus musculus GN=Rpl17 PE=1 SV=3                                                |
| Q8CU52                | 0.021685248 | 12  | 12  | 6   | 4  | 16  | 16  | 9   | 17  | Microtubule-associated protein 18 OS-Mus musculus GN=Map18 PE=1 SV=2                                        |
| Q93991                | 0.177085502 | 4   | 4   | 3   | 0  | 6   | 6   | 4   | 11  | H-2-E1 histocompatibility antigen, K-W2 alpha chain OS-Mus musculus GN=H2-K1 PE=1 SV=2                      |
| P60488                | 0.527034526 | 11  | 11  | 9   | 6  | 24  | 13  | 14  | 12  | 60S ribosomal protein L10-like OS-Mus musculus GN=Rpl10l PE=2 SV=1                                          |
| Q9E1T5                | 0.21081797  | 0   | 3   | 2   | 0  | 4   | 3   | 2   | 8   | Acidic leucine-rich nuclear phosphoprotein 32 family member B OS-Mus musculus GN=Anp32b PE=1 SV=1           |
| Q9DB83                | 0.216208886 | 15  | 14  | 9   | 5  | 15  | 20  | 18  | 20  | Charged multivesicular body protein 4b OS-Mus musculus GN=Chmp4b PE=1 SV=2                                  |
| contaminant_KERATIN13 | 0.344621769 | 79  | 73  | 133 | 34 | 223 | 121 | 99  | 97  | no description                                                                                              |
| P60335                | 0.117534538 | 22  | 11  | 17  | 5  | 34  | 27  | 12  | 20  | Poly(C)-binding protein 1 OS-Mus musculus GN=Pcpbl1 PE=1 SV=1                                               |
| Q61414                | 0.099515381 | 16  | 8   | 18  | 3  | 24  | 23  | 17  | 12  | Keratin, type I cytoskeletal 15 OS-Mus musculus GN=Krt15 PE=1 SV=2                                          |
| A0A0M4SVT3            | 0.117647009 | 4   | 4   | 8   | 0  | 6   | 9   | 8   | 13  | Guanine nucleotide-binding protein subunit gamma (Fragment) OS-Mus musculus GN=Gng12 PE=1 SV=1              |
| A0A0M4SW28            | 0.117647009 | 4   | 4   | 8   | 0  | 6   | 9   | 8   | 13  | Guanine nucleotide-binding protein subunit gamma (Fragment) OS-Mus musculus GN=Gng12 PE=1 SV=1              |
| P53994                | 0.535052691 | 9   | 12  | 7   | 6  | 15  | 5   | 0   | 23  | Ras-related protein Rab-2a OS-Mus musculus GN=Rab2a PE=1 SV=1                                               |
| Q9JMH6                | 0.689804096 | 0   | 3   | 2   | 3  | 5   | 0   | 4   | 0   | Thioredoxin reductase 1, cytoplasmic OS-Mus musculus GN=Txrnd1 PE=1 SV=3                                    |
| Q61239                | 0.889616466 | 3   | 3   | 2   | 0  | 0   | 6   | 0   | 3   | Protein farnesyltransferase/geranylgeranyltransferase type 1 subunit alpha OS-Mus musculus GN=Fta PE=1 SV=1 |
| Q3TLP8                | 0.103777105 | 49  | 28  | 42  | 10 | 47  | 53  | 58  | 59  | Putative uncharacterized protein OS-Mus musculus GN=Rac1 PE=1 SV=1                                          |
| P29341                | 0.096063561 | 32  | 20  | 22  | 4  | 41  | 34  | 20  | 31  | Poly(ADP-ribose)-binding protein 1 OS-Mus musculus GN=Papbl1 PE=1 SV=2                                      |
| Q9PMN1                | 0.147289486 | 38  | 18  | 25  | 3  | 43  | 35  | 21  | 42  | Lysine-tRNA ligase OS-Mus musculus GN=Kars PE=1 SV=1                                                        |
| P62631                | 0.028515588 | 144 | 109 | 133 | 38 | 193 | 198 | 158 | 162 | Elongation factor 1-alpha 2 OS-Mus musculus GN=Eef1a2 PE=1 SV=1                                             |
| contaminant_KERATIN17 | 0.825334686 | 27  | 21  | 41  | 24 | 77  | 52  | 35  | 25  | no description                                                                                              |
| Q3LPL0                | 0.214231566 | 19  | 13  | 7   | 0  | 35  | 12  | 0   | 28  | Protein transport protein Sec31A OS-Mus musculus GN=Sec31a PE=1 SV=2                                        |
| H7BWY4                | 0.088242453 | 3   | 0   | 0   | 0  | 7   | 0   | 2   | 6   | Disks large homolog 1 OS-Mus musculus GN=Dgl1 PE=1 SV=1                                                     |
| Q9O9H0                | 0.088242453 | 3   | 0   | 0   | 0  | 7   | 0   | 2   | 6   | Disks large homolog 1 OS-Mus musculus GN=Dgl1 PE=1 SV=1                                                     |
| Q811D0                | 0.088242453 | 3   | 0   | 0   | 0  | 7   | 0   | 2   | 6   | Disks large homolog 1 OS-Mus musculus GN=Dgl1 PE=1 SV=1                                                     |
| P10831                | 0.160783849 | 3   | 0   | 0   | 0  | 7   | 0   | 2   | 7   | Ras-related protein Rab-5 OS-Mus musculus GN=Rab5 PE=1 SV=1                                                 |
| P42227                | 0.580447993 | 6   | 3   | 8   | 4  | 5   | 12  | 9   | 9   | Signal transducer and activator of transcription 3 OS-Mus musculus GN=Stat3 PE=1 SV=2                       |
| P39688                | 0.819180041 | 0   | 0   | 3   | 0  | 0   | 0   | 0   | 5   | Tyrosine-protein kinase Fyn OS-Mus musculus GN=Fyn PE=1 SV=4                                                |
| A0A087WNM1            | 0.07797806  | 2   | 0   | 0   | 0  | 4   | 3   | 0   | 4   | 3-LETT-ROBO Rho GTPase-activating protein 2 OS-Mus musculus GN=Sragp PE=1 SV=1                              |
| Q9R190                | 0.123536855 | 0   | 2   | 0   | 0  | 3   | 3   | 0   | 4   | Proteasome                                                                                                  |



|                              |             |     |     |     |    |     |     |     |     |                                                                                                  |
|------------------------------|-------------|-----|-----|-----|----|-----|-----|-----|-----|--------------------------------------------------------------------------------------------------|
| Q61655                       | 0.23493532  | 7   | 4   | 7   | 2  | 10  | 8   | 8   | 5   | ATP-dependent RNA helicase DDX19A OS=Mus musculus GN=Ddx19a PE=1 SV=2                            |
| A0A1B9GSF7                   | 0.178247069 | 18  | 0   | 0   | 0  | 3   | 15  | 19  | 16  | 60S ribosomal protein L18 OS=Mus musculus GN=Rpl18 PE=1 SV=1                                     |
| H3BY9                        | 0.127010146 | 7   | 8   | 7   | 2  | 6   | 7   | 9   | 13  | AP complex subunit beta OS=Mus musculus GN=Apb21 PE=1 SV=1                                       |
| P46638                       | 0.45548301  | 8   | 7   | 8   | 5  | 10  | 10  | 9   | 15  | Ras-related protein Rab-11B OS=Mus musculus GN=Rab11b PE=1 SV=3                                  |
| P21279                       | 0.548696184 | 7   | 4   | 4   | 0  | 8   | 7   | 0   | 8   | Guanine nucleotide-binding protein (Gq) subunit alpha OS=Mus musculus GN=Gqaq PE=1 SV=4          |
| G3LUX3                       | 0.160975935 | 10  | 9   | 10  | 3  | 16  | 9   | 9   | 23  | Septaplerin reductase OS=Mus musculus GN=Spr PE=1 SV=1                                           |
| P99024                       | 0.019141659 | 327 | 210 | 262 | 46 | 440 | 317 | 232 | 304 | Tubulin beta-5 chain OS=Mus musculus GN=Tabb5 PE=1 SV=1                                          |
| Q22264                       | 0.019949493 | 209 | 150 | 180 | 28 | 311 | 233 | 152 | 186 | Tubulin beta-6 chain OS=Mus musculus GN=Tabb6 PE=1 SV=1                                          |
| contaminant_KERATIN5         | 0.59701727  | 29  | 22  | 46  | 11 | 67  | 52  | 27  | 19  | no description                                                                                   |
| P68372                       | 0.00791338  | 311 | 205 | 249 | 46 | 416 | 310 | 228 | 281 | Tubulin beta-4B chain OS=Mus musculus GN=Tabb4b PE=1 SV=1                                        |
| Q9WUM4                       | 0.152650374 | 12  | 6   | 7   | 2  | 14  | 10  | 5   | 12  | Coronin-1C OS=Mus musculus GN=Coro1c PE=1 SV=1                                                   |
| Q7TMM4                       | 0.008265494 | 304 | 194 | 239 | 44 | 402 | 298 | 216 | 263 | Tubulin beta-2A chain OS=Mus musculus GN=Tabb2a PE=1 SV=1                                        |
| Q1VH6                        | 0.602245994 | 5   | 5   | 6   | 0  | 9   | 12  | 0   | 3   | Protein MEMO1 OS=Mus musculus GN=Memo1 PE=1 SV=1                                                 |
| Q8VE47                       | 0.2351008   | 3   | 0   | 0   | 0  | 5   | 0   | 0   | 4   | Ubiquitin-like modifier-activating enzyme 5 OS=Mus musculus GN=Uba5 PE=1 SV=2                    |
| Q8RS74                       | 0.312430585 | 2   | 2   | 2   | 0  | 3   | 0   | 0   | 0   | Phosphoribosyl pyrophosphate synthase-associated protein 2 OS=Mus musculus GN=Prpsap2 PE=1 SV=1  |
| P46084                       | 0.321663467 | 5   | 3   | 3   | 0  | 5   | 3   | 0   | 10  | ADP-ribosyl transferase 5 OS=Mus musculus GN=Aar5 PE=1 SV=2                                      |
| H7BX01                       | 0.391002219 | 0   | 2   | 0   | 0  | 0   | 0   | 0   | 0   | Dynamin-like 120 kDa protein, mitochondrial OS=Mus musculus GN=Opal PE=1 SV=1                    |
| JQNY1                        | 0.552976076 | 14  | 0   | 16  | 9  | 22  | 22  | 7   | 27  | Protein RIM22 OS=Mus musculus GN=Rim22 PE=1 SV=1                                                 |
| Q3LGB8                       | 0.625755727 | 4   | 4   | 4   | 0  | 4   | 7   | 0   | 7   | DAZ associated protein 1, isoform CRA_a OS=Mus musculus GN=Dazap1 PE=1 SV=1                      |
| Q9JH5                        | 0.625755727 | 4   | 4   | 4   | 0  | 4   | 7   | 0   | 7   | DAZ-associated protein 1 OS=Mus musculus GN=Dazap1 PE=1 SV=2                                     |
| FSVQC1                       | 0.703908018 | 0   | 0   | 0   | 2  | 0   | 3   | 0   | 0   | Signal recognition particle subunit SRP72 OS=Mus musculus GN=Spr72 PE=1 SV=1                     |
| EQ0740                       | 0.703908018 | 0   | 0   | 0   | 2  | 0   | 3   | 0   | 0   | Protein Spr72 OS=Mus musculus GN=Spr72 PE=1 SV=1                                                 |
| Q9D1G1                       | 0.731253359 | 0   | 0   | 0   | 2  | 3   | 2   | 0   | 4   | Ras-related protein Rab-1B OS=Mus musculus GN=Rab1b PE=1 SV=1                                    |
| A0A887WSQ1                   | 0.756612216 | 2   | 0   | 0   | 0  | 0   | 0   | 0   | 0   | SLIT-related Rho GTPase-activating protein 2 (Fragment) OS=Mus musculus GN=Srap2 PE=1 SV=1       |
| GIUVT5                       | 0.762348101 | 0   | 2   | 0   | 0  | 0   | 0   | 0   | 3   | Receptor-type tyrosine-protein phosphatase delta OS=Mus musculus GN=Prpd PE=1 SV=1               |
| PE2313                       | 0.794656282 | 4   | 0   | 0   | 0  | 0   | 0   | 0   | 0   | U6 snRNA-associated Sm-like protein LSm6 OS=Mus musculus GN=Lsm6 PE=1 SV=1                       |
| Reverse_sp/P99838/JTDI_MOUSE | 0.820272506 | 0   | 0   | 2   | 0  | 0   | 3   | 0   | 0   | DNA nucleodilyloxotransferase OS=Mus musculus GN=Dnt PE=1 SV=3                                   |
| Q3LMF0                       | 0.913348156 | 3   | 2   | 0   | 0  | 0   | 0   | 0   | 3   | Coronin protein-like 1 OS=Mus musculus GN=Cobll1 PE=1 SV=2                                       |
| BIAR69                       | 0.913348156 | 0   | 2   | 0   | 0  | 0   | 0   | 0   | 0   | Protein Myh13 OS=Mus musculus GN=Myh13 PE=1 SV=1                                                 |
| BIAZ26                       | 0.913348156 | 0   | 2   | 0   | 0  | 0   | 0   | 0   | 0   | 3 Cordon-bleu protein-like 1 (Fragment) OS=Mus musculus GN=Cobll1 PE=1 SV=8                      |
| BIAZ14                       | 0.913348156 | 0   | 2   | 0   | 0  | 0   | 0   | 0   | 0   | 3 Cordon-bleu protein-like 1 OS=Mus musculus GN=Cobll1 PE=1 SV=1                                 |
| BIAZ15                       | 0.913348156 | 0   | 2   | 0   | 0  | 0   | 0   | 0   | 0   | 3 Cordon-bleu protein-like 1 OS=Mus musculus GN=Cobll1 PE=1 SV=1                                 |
| Q9P1S3                       | 0.913348156 | 0   | 2   | 0   | 0  | 0   | 0   | 0   | 0   | 3 Phosphoserine phosphatase OS=Mus musculus GN=Psp PE=1 SV=1                                     |
| EQ0KZ2                       | 0.91908832  | 0   | 0   | 2   | 0  | 3   | 0   | 0   | 0   | Importin-9 OS=Mus musculus GN=Ipo9 PE=1 SV=1                                                     |
| Q1YIE6                       | 0.91908832  | 0   | 0   | 2   | 0  | 3   | 0   | 0   | 0   | Importin-9 OS=Mus musculus GN=Ipo9 PE=1 SV=3                                                     |
| P2K369                       | 0.91908832  | 0   | 0   | 2   | 0  | 3   | 0   | 0   | 0   | Spletin isoform U2AF 65 kDa subunit OS=Mus musculus GN=U2af2 PE=1 SV=3                           |
| A0A0A6X9R4                   | 0.91908832  | 0   | 0   | 2   | 0  | 3   | 0   | 0   | 0   | Quinone oxidoreductase (Fragment) OS=Mus musculus GN=Cry2 PE=1 SV=5                              |
| Q80XR5                       | 0.91908832  | 0   | 0   | 2   | 0  | 3   | 0   | 0   | 0   | Splicing factor U2AF 65 kDa subunit OS=Mus musculus GN=U2af2 PE=1 SV=1                           |
| Q8BX9                        | 0.954265367 | 0   | 0   | 0   | 3  | 0   | 5   | 4   | 4   | Chloride intracellular channel protein 5 OS=Mus musculus GN=Clic5 PE=1 SV=1                      |
| Q62426                       | 0.1483057   | 4   | 5   | 5   | 0  | 11  | 6   | 4   | 4   | Cystatin-B OS=Mus musculus GN=Csb PE=1 SV=1                                                      |
| PE2301                       | 0.244057952 | 46  | 34  | 52  | 13 | 80  | 56  | 44  | 3   | Histone H3C OS=Mus musculus GN=H3c PE=1 SV=3                                                     |
| Q9CWF2                       | 0.007218146 | 307 | 196 | 238 | 46 | 397 | 297 | 216 | 263 | Tubulin beta-2B chain OS=Mus musculus GN=Tabb2b PE=1 SV=1                                        |
| P45591                       | 0.129065734 | 6   | 7   | 0   | 0  | 13  | 9   | 0   | 0   | 7 Cofilin-2 OS=Mus musculus GN=Cfl2 PE=1 SV=1                                                    |
| Q70310                       | 0.529791519 | 19  | 6   | 10  | 2  | 21  | 16  | 2   | 6   | Glycylpeptide N-tetradecanoyltransferase 1 OS=Mus musculus GN=Nnt1 PE=1 SV=1                     |
| P68433                       | 0.900389435 | 44  | 0   | 14  | 7  | 76  | 0   | 56  | 0   | Histone H3.1 OS=Mus musculus GN=H3h3a PE=1 SV=2                                                  |
| contaminant_KERATIN22        | 0.809625526 | 66  | 66  | 91  | 45 | 135 | 101 | 92  | 69  | no description                                                                                   |
| A2A6U3                       | 0.418524953 | 15  | 13  | 16  | 4  | 29  | 10  | 13  | 19  | Septin-9 OS=Mus musculus GN=Sep9 PE=1 SV=1                                                       |
| P99027                       | 0.145731469 | 9   | 0   | 8   | 0  | 17  | 13  | 4   | 6   | 60S acidic ribosomal protein P2 OS=Mus musculus GN=Rplp2 PE=1 SV=3                               |
| P46091                       | 0.584953501 | 6   | 4   | 2   | 0  | 18  | 3   | 0   | 0   | 4 AP-2 complex subunit mu OS=Mus musculus GN=Ap2mu1 PE=1 SV=1                                    |
| A0A0A9YUZA                   | 0.058985968 | 8   | 8   | 8   | 0  | 9   | 15  | 12  | 11  | High mobility group protein B1 (Fragment) OS=Mus musculus GN=Hmgbl1 PE=1 SV=1                    |
| P63158                       | 0.058985968 | 8   | 8   | 8   | 0  | 9   | 15  | 12  | 11  | High mobility group protein B1 OS=Mus musculus GN=Hmgbl1 PE=1 SV=2                               |
| Q8K271                       | 0.250590776 | 3   | 0   | 2   | 0  | 3   | 5   | 3   | 0   | Nmra-like family domain-containing protein 1 OS=Mus musculus GN=Nmrall1 PE=1 SV=1                |
| Q7D1I2                       | 0.250590776 | 3   | 0   | 2   | 0  | 3   | 5   | 3   | 0   | Nmra-like family domain-containing protein 1 OS=Mus musculus GN=Nmrall1 PE=1 SV=1                |
| G5E857                       | 0.250590776 | 3   | 0   | 2   | 0  | 3   | 5   | 3   | 0   | Nmra-like family domain-containing protein 1, isoform CRA_a OS=Mus musculus GN=Nmrall1 PE=1 SV=1 |
| H7BX22                       | 0.183641318 | 17  | 13  | 11  | 2  | 22  | 14  | 10  | 17  | Ras-specific GTPase-activating protein OS=Mus musculus GN=Ranbp1 PE=1 SV=1                       |
| Q9ZT17                       | 0.015412274 | 8   | 8   | 5   | 0  | 13  | 10  | 9   | 9   | MCCL3402, isoform CRA_c OS=Mus musculus GN=Pbbp1 PE=1 SV=1                                       |
| Q3LID2                       | 0.133464047 | 8   | 5   | 12  | 12 | 62  | 53  | 25  | 62  | Tubulin beta-1b chain OS=Mus musculus GN=Tabb1b PE=1 SV=1                                        |
| D32494                       | 0.229295285 | 16  | 11  | 15  | 0  | 12  | 21  | 17  | 32  | MCCG142264, isoform CRA_a OS=Mus musculus GN=Akr110b PE=1 SV=1                                   |
| P62492                       | 0.744191921 | 8   | 7   | 8   | 5  | 10  | 8   | 10  | 13  | Ras-related protein Rab-11A OS=Mus musculus GN=Rab11a PE=1 SV=3                                  |
| P8030                        | 0.1624691   | 35  | 32  | 30  | 5  | 46  | 32  | 33  | 38  | Adenine phosphoribosyltransferase OS=Mus musculus GN=Aprt PE=1 SV=2                              |
| PD2141                       | 0.387302843 | 3   | 0   | 2   | 0  | 49  | 18  | 0   | 2   | Gamma-aminobutyrate phosphatase PPI-beta catalytic subunit OS=Mus musculus GN=Pppblc PE=1 SV=3   |
| S482M7                       | 0.523548104 | 148 | 119 | 151 | 70 | 170 | 186 | 173 | 180 | Phosphoglycerate kinase OS=Mus musculus GN=Pglk1 PE=1 SV=1                                       |
| P47226                       | 0.716530963 | 0   | 4   | 3   | 6  | 5   | 0   | 0   | 5   | Testin OS=Mus musculus GN=Tes PE=1 SV=1                                                          |
| Q8OLG5                       | 0.462040735 | 15  | 13  | 17  | 4  | 29  | 10  | 13  | 19  | Septin-9 OS=Mus musculus GN=Sep9 PE=1 SV=1                                                       |
| P34884                       | 0.836460134 | 12  | 5   | 12  | 0  | 18  | 3   | 0   | 0   | Microtubule migration inhibitory factor OS=Mus musculus GN=Mif PE=1 SV=2                         |
| A2A6U5                       | 0.368174052 | 14  | 13  | 15  | 3  | 25  | 10  | 13  | 17  | Septin-9 (Fragment) OS=Mus musculus GN=Sep9 PE=1 SV=1                                            |
| Q64337                       | 0.139312504 | 3   | 3   | 0   | 0  | 4   | 6   | 3   | 0   | 0 Sequestosome-1 OS=Mus musculus GN=Sqstm1 PE=1 SV=1                                             |
| D3YX79                       | 0.843007197 | 0   | 0   | 4   | 2  | 7   | 0   | 2   | 4   | Proteasome subunit alpha type OS=Mus musculus GN=Gm8394 PE=3 SV=1                                |
| Q9Z2U1                       | 0.843007197 | 0   | 0   | 4   | 2  | 7   | 0   | 2   | 4   | Proteasome subunit alpha type-5 OS=Mus musculus GN=Gm8394 PE=1 SV=1                              |
| D3Z051                       | 0.223753894 | 0   | 0   | 5   | 14 | 70  | 0   | 0   | 54  | Annin (Fragment) OS=Mus musculus GN=Annin PE=1 SV=1                                              |
| A0A140T8L3                   | 0.332725684 | 34  | 20  | 27  | 5  | 32  | 0   | 0   | 30  | Protein Rpl7a-pS5 OS=Mus musculus GN=Rpl7a-pS5 PE=4 SV=1                                         |
| Q9ZCD3                       | 0.282316598 | 65  | 62  | 50  | 11 | 73  | 63  | 59  | 75  | Glycine-tRNA ligase OS=Mus musculus GN=Gars PE=1 SV=1                                            |
| Q8B67                        | 0.241864397 | 86  | 52  | 54  | 22 | 83  | 79  | 65  | 80  | Protein RCC2 OS=Mus musculus GN=Rcc2 PE=1 SV=1                                                   |
| Q9JDS8                       | 0.545933292 | 9   | 7   | 7   | 0  | 10  | 12  | 0   | 7   | Low molecular weight phosphatase OS=Mus musculus GN=Acpl PE=1 SV=3                               |
| FSVPU2                       | 0.225466084 | 4   | 3   | 4   | 0  | 5   | 4   | 4   | 4   | 8 FERL, RhoGEF and pleckstrin domain-containing protein 1 OS=Mus musculus GN=Farpl1 PE=1 SV=1    |
| Q8R2O8                       | 0.019477191 | 6   | 0   | 8   | 0  | 12  | 11  | 10  | 7   | Bone marrow stromal antigen 2 OS=Mus musculus GN=Bst2 PE=1 SV=1                                  |
| Q8B6Z5                       | 0.054782418 | 8   | 8   | 5   | 0  | 13  | 10  | 8   | 9   | MCC13402, isoform CRA_a OS=Mus musculus GN=Pbbp1 PE=1 SV=1                                       |
| Q70435                       | 0.099330756 | 4   | 0   | 4   | 0  | 9   | 4   | 3   | 3   | Protein subunit alpha type-3 OS=Mus musculus GN=Pama3 PE=1 SV=3                                  |
| E903P9                       | 0.116378032 | 8   | 7   | 8   | 5  | 10  | 0   | 0   | 0   | 0 Ras-related protein Rab-11A OS=Mus musculus GN=Rab11a PE=4 SV=1                                |
| GIUVT9                       | 0.116378032 | 8   | 7   | 8   | 5  | 10  | 0   | 0   | 0   | 0 MC22989, isoform CRA_a OS=Mus musculus GN=Rab11b PE=4 SV=1                                     |
| FSWG51                       | 0.116378032 | 8   | 7   | 8   | 5  | 10  | 0   | 0   | 0   | 0 Ras-related protein Rab-11A (Fragment) OS=Mus musculus GN=Rab11a PE=4 SV=1                     |
| PE2751                       | 0.898184857 | 12  | 11  | 11  | 3  | 13  | 15  | 9   | 13  | 60S ribosomal protein L23a OS=Mus musculus GN=Rpl23a PE=1 SV=1                                   |
| contaminant_KERATIN106       | 0.029775118 | 12  | 6   | 13  | 0  | 19  | 19  | 13  | 8   | no description                                                                                   |
| Q8BHN3                       | 0.487742658 | 6   | 2   | 0   | 2  | 7   | 5   | 3   | 4   | Neutral alpha-glucosidase AB OS=Mus musculus GN=Ganab PE=1 SV=1                                  |
| PE4244                       | 0.073994888 | 45  | 35  | 0   | 0  | 80  | 56  | 0   | 35  | Histone H3.3 OS=Mus musculus GN=H3h3a PE=1 SV=2                                                  |
| Q9JK11                       | 0.080521409 | 16  | 16  | 16  | 4  | 20  | 17  | 18  | 17  | UPF0160 protein MYG1, mitochondrial OS=Mus musculus GN=Mylg1 PE=1 SV=1                           |
| P34022                       | 0.360771148 | 20  | 17  | 11  | 2  | 24  | 16  | 10  | 21  | Ras-specific GTPase-activating protein OS=Mus musculus GN=Ranbp1 PE=1 SV=2                       |
| Q9EPU0                       | 0.08699885  | 29  | 25  | 31  | 8  | 37  | 36  | 23  | 36  | Regulator of homeobox transcripts 1 OS=Mus musculus GN=Upf1 PE=1 SV=2                            |
| contaminant_KERATIN3         | 0.086998113 | 69  | 64  | 89  | 34 | 109 | 107 | 75  | 72  | no description                                                                                   |
| Q9QY36                       | 0.528928949 | 6   | 4   | 4   | 0  | 6   | 6   | 0   | 6   | 5 N-alpha-acetyltransferase 10 OS=Mus musculus GN=Naa10 PE=1 SV=1                                |
| BIAYU7                       | 0.528928949 | 6   | 4   | 2   | 0  | 6   | 6   | 0   | 6   | 5 N-alpha-acetyltransferase 10 OS=Mus musculus GN=Naa10 PE=1 SV=1                                |
| BIAYU8                       | 0.528928949 | 6   | 4   | 2   | 0  | 6   | 6   | 0   | 6   | 5 N-alpha-acetyltransferase 10 OS=Mus musculus GN=Naa10 PE=1 SV=1                                |
| P19246                       | 0.886451011 | 0   | 0   | 0   | 6  | 10  | 7   | 8   | 0   | 0 Neurofilament heavy polypeptide OS=Mus musculus GN=Nefh PE=1 SV=3                              |
| Q9QCU0                       | 0.468004444 | 0   | 91  | 72  | 61 | 22  | 73  | 88  | 124 | Transferrin protein RhoA OS=Mus musculus GN=Rhoa PE=1 SV=1                                       |
| contaminant_KERATIN16        | 0.485058889 | 10  | 7   | 9   | 3  | 12  | 9   | 13  | 7   | no description                                                                                   |
| G5E829                       | 0.131694756 | 17  | 8   | 18  | 0  | 29  | 19  | 12  | 21  | Plasma membrane calcium-transporting ATPase 1 OS=Mus musculus GN=Atp2b1 PE=1 SV=1                |
| Q3TWV4                       | 0.657673882 | 6   | 2   | 7   | 0  | 10  | 5   | 5   | 5   | 4 AP-2 complex subunit mu OS=Mus musculus GN=Ap2mu1 PE=1 SV=1                                    |
| Q9WVK4                       | 0.291558912 | 52  | 30  | 39  | 8  | 61  | 40  | 26  | 55  | EH domain-containing protein 1 OS=Mus musculus GN=Eh1 PE=1 SV=1                                  |
| PE2983                       | 0.545934288 | 117 | 99  | 101 | 46 | 141 | 126 | 124 | 118 | Ubiquitin ribosomal protein S27a OS=Mus musculus GN=Rps27a PE=1 SV=2                             |
| Q8BZV3                       | 0.016354237 | 6   | 4   | 6   | 0  | 9   | 8   | 9   | 4   | Protein Ddx19b OS=Mus musculus GN=Ddx19b PE=1 SV=1                                               |
| contaminant_UBIQUITIN8       | 0.606601808 | 112 | 95  | 96  | 46 | 131 | 122 | 122 | 114 | no description                                                                                   |
| A2A6E9                       | 0.013079041 | 5   | 0   | 0   | 0  | 9   | 8   | 4   | 7   | Glutathione S-transferase Mu 1 OS=Mus musculus GN=Gstm1 PE=1 SV=2                                |
| P10649                       | 0.013079041 | 5   | 0   | 0   | 0  | 9   | 8   | 4   | 7   | Glutathione S-transferase Mu 1 OS=Mus musculus GN=Gstm1 PE=1 SV=2                                |
| A2A6F8                       | 0.74496571  | 3   | 0   | 2   | 0  | 4   | 0   | 0   | 0   | 60S ribosomal protein L23 (Fragment) OS=Mus musculus GN=Rpl23 PE=1 SV=1                          |
| A0A140T8M7                   | 0.856411676 | 12  | 11  | 4   | 8  | 13  | 14  | 9   | 13  | Protein Rpl23a-pS3 OS=Mus musculus GN=Rpl23a-pS3 PE=3 SV=1                                       |
| Q6LRW6                       | 0.953699199 | 11  | 9   | 4   | 4  | 21  | 8   | 5   | 8   | 5 Myosin-14 OS=Mus musculus GN=Myh14 PE=1 SV=1                                                   |
| A2A5L3                       | 0.636387905 | 21  | 23  | 27  | 11 | 31  | 36  | 24  | 20  | Keratin, type I cytoskeletal 10 OS=Mus musculus GN=Krt10 PE=1 SV=1                               |
| Q9CYL5                       | 0.877048817 | 10  | 9   | 8   | 6  | 15  | 7   | 8   | 16  | Golgi-associated plant pathogenesis-related protein 1 OS=Mus musculus GN=Glpr2 PE=1 SV=3         |
| P16627                       | 0.687753333 | 81  | 71  | 79  | 37 | 93  | 101 | 96  | 82  | Heat shock 70 kDa protein 1-like OS=Mus musculus GN=Hspa11 PE=1 SV=4                             |
| Q9R0K7                       | 0.228755241 | 4   | 4   | 5   | 0  | 10  | 4   | 3   | 7   | Plasma membrane calcium-transporting ATPase 2 OS=Mus musculus GN=Atp2b2 PE=1 SV=2                |
| Q9W1V7                       | 0.452481681 | 16  | 15  | 14  | 0  | 16  | 39  | 25  | 20  | Conventional myosin-IIb gamma OS=Mus                                                             |

|                                |              |     |     |     |    |     |     |     |                                                                                                                           |
|--------------------------------|--------------|-----|-----|-----|----|-----|-----|-----|---------------------------------------------------------------------------------------------------------------------------|
| Q60737                         | 0.803869701  | 4   | 0   | 2   | 0  | 3   | 0   | 0   | 5 Casen kinase II subunit alpha OS=Mus musculus GN=Cank2a1 PE=1 SV=2                                                      |
| O68808                         | 0.807167315  | 0   | 3   | 0   | 0  | 0   | 0   | 4   | 0 Protein diaphanous homolog 1 OS=Mus musculus GN=Dp1h1 PE=1 SV=1                                                         |
| Q43456                         | 0.807167315  | 0   | 3   | 0   | 0  | 0   | 0   | 4   | 0 Xln acid-binding repeat-containing protein 2 OS=Mus musculus GN=Xkp2 PE=1 SV=1                                          |
| P61967                         | 0.826683737  | 2   | 4   | 0   | 0  | 0   | 0   | 3   | 0 5 A1 complex subunit sigma-1A OS=Mus musculus GN=Ap1a1 PE=1 SV=1                                                        |
| Q3UX61                         | 0.933313133  | 5   | 3   | 0   | 0  | 0   | 0   | 6   | 6 4 N-alpha-acetyltransferase 11 OS=Mus musculus GN=Naa11 PE=1 SV=1                                                       |
| P62754                         | 0.923533389  | 20  | 18  | 23  | 3  | 31  | 19  | 16  | 19 40S ribosomal protein S6 OS=Mus musculus GN=R6ap1 PE=1 SV=1                                                            |
| Q9D234                         | 0.924046399  | 5   | 4   | 0   | 0  | 0   | 0   | 5   | 11 Mixed lineage kinase domain-like protein OS=Mus musculus GN=Mkl1 PE=1 SV=1                                             |
| E9QPE7                         | 0.9457554452 | 64  | 52  | 59  | 37 | 90  | 0   | 63  | 38 Myosin I OS=Mus musculus GN=Myl1 PE=1 SV=1                                                                             |
| P62242                         | 0.962907971  | 48  | 34  | 32  | 12 | 47  | 37  | 34  | 49 40S ribosomal protein S8 OS=Mus musculus GN=R8a1 PE=1 SV=2                                                             |
| B2M1R6                         | 0.93613807   | 3   | 18  | 28  | 3  | 28  | 30  | 23  | 29 Heterogeneous nuclear ribonucleoprotein K OS=Mus musculus GN=Hnrnpk PE=1 SV=1                                          |
| Q8VED5                         | 0.99842754   | 15  | 13  | 19  | 9  | 0   | 22  | 0   | 15 Keratin, type II cytoskeletal 79 OS=Mus musculus GN=Krt79 PE=1 SV=2                                                    |
| P55762                         | 0.800851382  | 8   | 10  | 0   | 0  | 12  | 8   | 0   | 13 CDW1 antigen OS=Mus musculus GN=CD1 PE=1 SV=2                                                                          |
| P17879                         | 0.856625887  | 87  | 76  | 82  | 39 | 95  | 99  | 97  | 83 Heat shock 70 kDa protein 1B OS=Mus musculus GN=Hspa1b PE=1 SV=3                                                       |
| contaminant_KERATIN7           | 0.103071447  | 14  | 8   | 19  | 0  | 27  | 22  | 13  | 10 no description                                                                                                         |
| P61979                         | 0.350611877  | 36  | 19  | 28  | 3  | 29  | 30  | 24  | 30 Heterogeneous nuclear ribonucleoprotein K OS=Mus musculus GN=Hnrnpk PE=1 SV=1                                          |
| Q9CZ22                         | 0.292905127  | 37  | 25  | 3   | 3  | 44  | 35  | 22  | 32 Serine/threonine kinase receptor-associated protein OS=Mus musculus GN=Sprap1 PE=1 SV=2                                |
| Q6ZWV7                         | 0.026249612  | 0   | 0   | 4   | 0  | 6   | 6   | 4   | 5 60S ribosomal protein L35 OS=Mus musculus GN=Rpl35 PE=1 SV=1                                                            |
| Q8B843                         | 0.120141757  | 3   | 5   | 0   | 0  | 7   | 5   | 5   | 4 Wiskott-Aldrich syndrome protein family member 2 OS=Mus musculus GN=Wasf2 PE=1 SV=1                                     |
| D3YWH9                         | 0.426466153  | 27  | 15  | 17  | 5  | 21  | 22  | 20  | 21 40S ribosomal protein S9 OS=Mus musculus GN=R9a1 PE=1 SV=1                                                             |
| Q3VL17                         | 0.98182997   | 15  | 15  | 15  | 0  | 40  | 17  | 0   | 6 Keratin, type II cytoskeletal 2 oral OS=Mus musculus GN=Krt6 PE=1 SV=1                                                  |
| Q60715                         | 0.143304561  | 3   | 3   | 0   | 2  | 0   | 3   | 0   | 4 Prolyl 4-hydroxylase subunit alpha-1 OS=Mus musculus GN=P4ha1 PE=1 SV=2                                                 |
| E9Q7B0                         | 0.143304561  | 3   | 3   | 0   | 2  | 0   | 3   | 0   | 4 Prolyl 4-hydroxylase subunit alpha-1 OS=Mus musculus GN=P4ha1 PE=1 SV=1                                                 |
| O9D172                         | 0.262923738  | 3   | 3   | 0   | 0  | 0   | 4   | 0   | 3 Glutamate--cysteine ligase regulatory subunit OS=Mus musculus GN=Gclm PE=1 SV=1                                         |
| P17156                         | 0.932328014  | 117 | 95  | 101 | 60 | 129 | 130 | 110 | 117 Heat shock-related 70 kDa protein 1 OS=Mus musculus GN=Hspa2 PE=1 SV=2                                                |
| Q8CBB6                         | 0.528574465  | 2   | 3   | 5   | 0  | 0   | 2   | 6   | 5 Tauksin OS=Mus musculus GN=Tksu PE=2 SV=2                                                                               |
| Q9JM14                         | 0.765431117  | 3   | 3   | 4   | 0  | 4   | 6   | 0   | 3 5'(3')-deoxyribonucleotidyl, cytosolic type OS=Mus musculus GN=N5c PE=1 SV=1                                            |
| A2AW41                         | 0.059821767  | 5   | 0   | 5   | 0  | 10  | 5   | 4   | 4 Protein Hmnp (Fragment) OS=Mus musculus GN=Hmnp PE=1 SV=1                                                               |
| Q9XQ39                         | 0.104210758  | 7   | 7   | 4   | 2  | 2   | 0   | 0   | 0 Developmentally-regulated GTP-binding protein 2 OS=Mus musculus GN=Dg2 PE=1 SV=1                                        |
| contaminant_KERATIN12          | 0.960476599  | 102 | 11  | 28  | 9  | 35  | 27  | 18  | 11 no description                                                                                                         |
| D3YYZ2                         | 0.943886605  | 102 | 92  | 84  | 46 | 110 | 102 | 110 | 99 MCG1031578 OS=Mus musculus GN=Gm5239 PE=1 SV=1                                                                         |
| E9Q0U7                         | 0.336958117  | 9   | 11  | 6   | 0  | 17  | 10  | 4   | 4 Heat shock protein 105 kDa OS=Mus musculus GN=Hsp111 PE=1 SV=1                                                          |
| Q61699                         | 0.336958117  | 9   | 11  | 6   | 0  | 17  | 10  | 4   | 4 Heat shock protein 105 kDa OS=Mus musculus GN=Hsp111 PE=1 SV=2                                                          |
| P11438                         | 0.919517221  | 12  | 9   | 9   | 7  | 11  | 12  | 14  | 11 Lysosome-associated membrane glycoprotein 1 OS=Mus musculus GN=Lamp1 PE=1 SV=2                                         |
| Q62465                         | 0.770340945  | 47  | 43  | 40  | 22 | 64  | 53  | 27  | 53 Synaptic vesicle membrane protein V-A1 homolog OS=Mus musculus GN=Vat1 PE=1 SV=3                                       |
| Q9Z5E7                         | 0.138350725  | 9   | 4   | 9   | 0  | 12  | 7   | 8   | 11 Serine/threonine-protein phosphatase 2A S5 kDa regulatory subunit B delta isoform OS=Mus musculus GN=Ppp2r2d PE=1 SV=1 |
| P0K556                         | 0.146673227  | 12  | 4   | 9   | 0  | 10  | 7   | 0   | 11 GTPase HRas OS=Mus musculus GN=Hras PE=1 SV=1                                                                          |
| H3BK96                         | 0.368493679  | 36  | 19  | 28  | 3  | 29  | 29  | 24  | 29 Heterogeneous nuclear ribonucleoprotein K (Fragment) OS=Mus musculus GN=Hnrpk PE=1 SV=8                                |
| Q6Q477                         | 0.044866919  | 3   | 0   | 4   | 0  | 5   | 4   | 4   | 5 Plasma membrane calcium-transporting ATPase 4 OS=Mus musculus GN=Atp2b4 PE=1 SV=1                                       |
| O9DCL9                         | 0.574475978  | 29  | 28  | 21  | 6  | 36  | 25  | 17  | 30 Multifunctional protein ADE2 OS=Mus musculus GN=Paes PE=1 SV=4                                                         |
| EOCDX8                         | 0.766558599  | 4   | 4   | 8   | 5  | 8   | 5   | 8   | 5 Proteasome endopeptidase complex OS=Mus musculus GN=Pmaf6 PE=1 SV=1                                                     |
| P70670                         | 0.831239205  | 37  | 35  | 3   | 3  | 44  | 4   | 0   | 0 Nascent polypeptide-associated complex subunit alpha, muscle-specific form OS=Mus musculus GN=Naca PE=1 SV=2            |
| contaminant_KERATIN21          | 0.894529057  | 36  | 18  | 33  | 18 | 55  | 35  | 30  | 15 no description                                                                                                         |
| G5EN87                         | 0.964952892  | 5   | 3   | 4   | 2  | 6   | 4   | 5   | 3 Bifunctional polynucleotide phosphatase/kinase OS=Mus musculus GN=Ppkp PE=1 SV=1                                        |
| E9D9A5                         | 0.964952892  | 5   | 3   | 4   | 2  | 6   | 4   | 5   | 3 Bifunctional polynucleotide phosphatase/kinase OS=Mus musculus GN=Ppkp PE=1 SV=1                                        |
| Q9LX16                         | 0.964952892  | 5   | 3   | 4   | 2  | 6   | 4   | 5   | 3 Bifunctional polynucleotide phosphatase/kinase OS=Mus musculus GN=Ppkp PE=1 SV=2                                        |
| P50247                         | 0.152503527  | 66  | 48  | 59  | 13 | 66  | 60  | 53  | 60 Adenosylhomocysteinase OS=Mus musculus GN=Ahecy PE=1 SV=3                                                              |
| O9Z1R9                         | 0.214407003  | 71  | 42  | 39  | 24 | 56  | 59  | 0   | 54 MCG124046 OS=Mus musculus GN=Prsl PE=1 SV=1                                                                            |
| H3BK60                         | 0.391389055  | 7   | 3   | 7   | 0  | 10  | 8   | 2   | 9 AP-2 complex subunit beta OS=Mus musculus GN=Ap2b1 PE=1 SV=1                                                            |
| Q9CWL7                         | 0.984712237  | 10  | 24  | 26  | 0  | 10  | 10  | 7   | 10 Keratin, type I cytoskeletal 17 OS=Mus musculus GN=Krt17 PE=1 SV=3                                                     |
| P60867                         | 0.540669399  | 27  | 15  | 18  | 2  | 20  | 22  | 13  | 24 40S ribosomal protein S20 OS=Mus musculus GN=Rp20 PE=1 SV=1                                                            |
| Q3TL72                         | 0.245593927  | 11  | 6   | 9   | 0  | 11  | 13  | 6   | 9 NEDD8-activating enzyme E1 catalytic subunit OS=Mus musculus GN=Uba3 PE=1 SV=1                                          |
| Q83C78                         | 0.245593927  | 11  | 6   | 9   | 0  | 11  | 13  | 6   | 9 NEDD8-activating enzyme E1 catalytic subunit OS=Mus musculus GN=Uba3 PE=1 SV=2                                          |
| Q9J096                         | 0.960219258  | 13  | 6   | 6   | 2  | 15  | 10  | 15  | 10 Rhodanese OS=Mus musculus GN=Rho1 PE=1 SV=1                                                                            |
| O9R0N0                         | 0.830090434  | 19  | 22  | 13  | 9  | 23  | 19  | 16  | 22 Galactosyltransferase OS=Mus musculus GN=Gal1 PE=1 SV=2                                                                |
| B7ZBV7                         | 0.39788873   | 4   | 6   | 0   | 0  | 7   | 5   | 0   | 7 Ubiquitin-conjugating enzyme E2 variant 1 OS=Mus musculus GN=Ubc2v1 PE=3 SV=1                                           |
| E9PV39                         | 0.39788873   | 4   | 6   | 0   | 0  | 7   | 5   | 0   | 7 Protein Gcn20431 OS=Mus musculus GN=Gm20431 PE=3 SV=1                                                                   |
| Q9CZJ3                         | 0.39788873   | 4   | 6   | 0   | 0  | 7   | 5   | 0   | 7 Ubiquitin-conjugating enzyme E2 variant 1 OS=Mus musculus GN=Ubc2v1 PE=1 SV=1                                           |
| P50446                         | 0.932743768  | 18  | 0   | 16  | 8  | 23  | 15  | 15  | 0 Keratin, type II cytoskeletal 6A OS=Mus musculus GN=Krt6a PE=1 SV=3                                                     |
| H3BK18                         | 0.629574176  | 32  | 0   | 28  | 3  | 26  | 0   | 0   | 27 Heterogeneous nuclear ribonucleoprotein K (Fragment) OS=Mus musculus GN=Hnrpk PE=1 SV=1                                |
| Q6ZWV5                         | 0.526135056  | 37  | 17  | 22  | 5  | 25  | 26  | 24  | 27 40S ribosomal protein S9 OS=Mus musculus GN=R9a1 PE=1 SV=3                                                             |
| AA0A180Q08                     | 0.41139668   | 22  | 18  | 19  | 3  | 15  | 26  | 19  | 18 60S ribosomal protein L18 OS=Mus musculus GN=Rpl18 PE=1 SV=1                                                           |
| P53580                         | 0.41139668   | 22  | 18  | 19  | 3  | 15  | 26  | 19  | 18 60S ribosomal protein L18 OS=Mus musculus GN=Rpl18 PE=1 SV=3                                                           |
| P61255                         | 0.945641694  | 16  | 18  | 22  | 7  | 28  | 16  | 16  | 19 60S ribosomal protein L26 OS=Mus musculus GN=Rpl26 PE=1 SV=1                                                           |
| E9PPW9                         | 0.467922694  | 26  | 18  | 27  | 8  | 24  | 23  | 23  | 29 Phenylalanine--tRNA ligase alpha subunit OS=Mus musculus GN=Farsa PE=1 SV=1                                            |
| E9FXM6                         | 0.005128225  | 3   | 0   | 2   | 0  | 8   | 10  | 10  | 7 Equilibrative nucleoside transporter 1 OS=Mus musculus GN=Slc29a1 PE=1 SV=1                                             |
| Reverse_t(E)PQ8K5:EPQ8K5_MOUSE | 0.565137286  | 0   | 0   | 2   | 0  | 0   | 0   | 0   | 3 Ttin OS=Mus musculus GN=Ttn PE=1 SV=1                                                                                   |
| O9J9B8                         | 0.596269088  | 4   | 0   | 4   | 0  | 3   | 3   | 0   | 9 Protein kinase C and casein kinase II substrate protein 3 OS=Mus musculus GN=Pacsin3 PE=1 SV=1                          |
| P70227                         | 0.676874056  | 4   | 0   | 4   | 0  | 0   | 0   | 4   | 6 Inositol 1,4,5-trisphosphate receptor type 3 OS=Mus musculus GN=Itrp3 PE=1 SV=1                                         |
| Q9CZJ3                         | 0.697327445  | 2   | 2   | 2   | 0  | 0   | 3   | 0   | 2 Proteasome assembly chaperone 3 OS=Mus musculus GN=Papg3 PE=1 SV=1                                                      |
| Q9LX16                         | 0.800831223  | 5   | 0   | 2   | 0  | 2   | 0   | 0   | 3 Putative RNA-binding protein Luc7-like 1 OS=Mus musculus GN=Luc7l1 PE=1 SV=1                                            |
| O35682                         | 0.848831264  | 4   | 2   | 6   | 0  | 0   | 4   | 0   | 6 Myeloid-associated differentiation marker OS=Mus musculus GN=Myadm PE=1 SV=2                                            |
| O9Z329                         | 0.897141878  | 0   | 0   | 4   | 0  | 0   | 5   | 0   | 0 Inositol 1,4,5-trisphosphate receptor type 2 OS=Mus musculus GN=Itrp2 PE=1 SV=4                                         |
| Q6ZWV9                         | 0.918030989  | 24  | 17  | 16  | 8  | 18  | 19  | 22  | 22 40S ribosomal protein S27 OS=Mus musculus GN=Rp27 PE=1 SV=1                                                            |
| AA0AR2JD0W7                    | 0.918030989  | 24  | 17  | 16  | 8  | 18  | 19  | 22  | 22 40S ribosomal protein S27 (Fragment) OS=Mus musculus GN=Rp27 PE=1 SV=1                                                 |
| Q6P99                          | 0.781839274  | 13  | 7   | 8   | 5  | 9   | 7   | 9   | 16 Anoxotinin OS=Mus musculus GN=Ano6 PE=1 SV=1                                                                           |
| Q6ZWV9                         | 0.402276641  | 262 | 0   | 0   | 95 | 218 | 224 | 216 | 227 Histone H2B type 1-C/E/G OS=Mus musculus GN=Hst1h2bc PE=1 SV=3                                                        |
| P61750                         | 0.282910935  | 9   | 7   | 7   | 0  | 9   | 10  | 6   | 13 ADP-ribosylation factor 4 OS=Mus musculus GN=Ar4 PE=1 SV=2                                                             |
| O9DCD0                         | 0.876234836  | 21  | 15  | 20  | 0  | 15  | 15  | 10  | 6-phosphogluconate dehydrogenase, decarboxylating OS=Mus musculus GN=Pgd PE=1 SV=3                                        |
| B1ARA3                         | 0.892787866  | 16  | 18  | 22  | 7  | 27  | 16  | 16  | 19 60S ribosomal protein L26 (Fragment) OS=Mus musculus GN=Rpl26 PE=1 SV=1                                                |
| Q8C0C7                         | 0.529978451  | 26  | 18  | 28  | 8  | 24  | 23  | 23  | 29 Phenylalanine--tRNA ligase alpha subunit OS=Mus musculus GN=Farsa PE=1 SV=1                                            |
| O84546                         | 0.303070343  | 3   | 0   | 4   | 0  | 0   | 3   | 5   | 5 Caprin small subunit 1 OS=Mus musculus GN=Capn1 PE=1 SV=1                                                               |
| AA0A04JZC2                     | 0.303070343  | 3   | 0   | 4   | 0  | 0   | 3   | 5   | 5 Caprin small subunit 1 OS=Mus musculus GN=Capn1 PE=1 SV=1                                                               |
| AA0A04JZC2                     | 0.303070343  | 3   | 0   | 4   | 0  | 0   | 3   | 5   | 5 Caprin small subunit 1 OS=Mus musculus GN=Capn1 PE=1 SV=1                                                               |
| P62331                         | 0.577847768  | 0   | 3   | 4   | 0  | 5   | 5   | 0   | 3 ADP-ribosylation factor 6 OS=Mus musculus GN=Arf6 PE=1 SV=2                                                             |
| P90053                         | 0.529941622  | 10  | 6   | 4   | 0  | 10  | 6   | 7   | 10 Dynamin-1 OS=Mus musculus GN=Dnm1 PE=1 SV=2                                                                            |
| AA0A07WR00                     | 0.416975625  | 8   | 11  | 12  | 0  | 11  | 11  | 8   | 21 Tripeptide peptidase 2 OS=Mus musculus GN=Tripe PE=1 SV=1                                                              |
| P14152                         | 0.527015299  | 11  | 14  | 13  | 2  | 16  | 10  | 0   | 11 Malate dehydrogenase, cytoplasmic OS=Mus musculus GN=Mdh1 PE=1 SV=3                                                    |
| AA0A140T8L1                    | 0.245252103  | 35  | 0   | 27  | 5  | 32  | 25  | 23  | 30 Protein Rpl7a-p3 OS=Mus musculus GN=Rpl7a-p3 PE=4 SV=1                                                                 |
| Q9EQK5                         | 0.735196524  | 13  | 9   | 15  | 2  | 8   | 15  | 8   | 17 Major vault protein OS=Mus musculus GN=Mvp PE=1 SV=4                                                                   |
| Q64525                         | 0.410290189  | 204 | 0   | 0   | 99 | 218 | 224 | 217 | 227 Histone H2B type 2-B OS=Mus musculus GN=Hst1h2b PE=1 SV=3                                                             |
| Q61411                         | 0.19461563   | 9   | 4   | 0   | 0  | 8   | 7   | 0   | 11 HT2PE Hras OS=Mus musculus GN=Hras PE=1 SV=2                                                                           |
| Q8B67                          | 0.869189662  | 7   | 10  | 5   | 0  | 4   | 9   | 0   | 4 60S ribosomal protein L24 OS=Mus musculus GN=Rpl24 PE=1 SV=1                                                            |
| Q64478                         | 0.11685461   | 265 | 0   | 0   | 96 | 218 | 224 | 217 | 227 Histone H2B type 1-H OS=Mus musculus GN=Hst1h2b PE=1 SV=3                                                             |
| Q90612                         | 0.333008977  | 41  | 36  | 42  | 26 | 45  | 44  | 32  | 44 Glucocorticoid-inducible phosphatase X OS=Mus musculus GN=Glipd PE=1 SV=3                                              |
| AA0A04YX13                     | 0.415098238  | 0   | 0   | 0   | 0  | 0   | 2   | 6   | 3 60S ribosomal protein L31 OS=Mus musculus GN=Rpl31 PE=1 SV=1                                                            |
| A6PWR1                         | 0.586133163  | 3   | 0   | 3   | 0  | 3   | 2   | 0   | 6 Protein kinase C and casein kinase II substrate protein 3 (Fragment) OS=Mus musculus GN=Pacsin3 PE=1 SV=1               |
| Q3UW92                         | 0.775597277  | 4   | 3   | 2   | 0  | 3   | 0   | 3   | 5 Putative uncharacterized protein OS=Mus musculus GN=Xpmp61 PE=1 SV=1                                                    |
| Q6PB1B                         | 0.775597277  | 4   | 3   | 2   | 0  | 3   | 0   | 3   | 5 Xaa-Pro aminopeptidase 1 OS=Mus musculus GN=Xpmp61 PE=1 SV=1                                                            |
| S4R1E3                         | 0.775597277  | 4   | 3   | 2   | 0  | 3   | 0   | 3   | 5 Xaa-Pro aminopeptidase 1 OS=Mus musculus GN=Xpmp61 PE=1 SV=1                                                            |
| Q8BWY3                         | 0.495846162  | 9   | 0   | 3   | 0  | 0   | 8   | 4   | 10 Eukaryotic peptide chain release factor subunit 1 OS=Mus musculus GN=Erf1 PE=1 SV=4                                    |
| Q00493                         | 0.804384873  | 19  | 12  | 22  | 7  | 29  | 20  | 8   | 16 Carboxypeptidase Y OS=Mus musculus GN=Cpe PE=1 SV=2                                                                    |
| A2A8L5                         | 0.767398723  | 35  | 28  | 28  | 8  | 32  | 29  | 23  | 26 Receptor-type tyrosine-protein phosphatase F OS=Mus musculus GN=Ppfrf PE=1 SV=1                                        |
| D3Z5G8                         | 0.287412639  | 7   | 6   | 6   | 0  | 3   | 5   | 0   | 10 Dimerizing protein 2 homolog B OS=Mus musculus GN=Dp2b PE=1 SV=1                                                       |
| contaminant_KERATIN18          | 0.933444688  | 35  | 12  | 32  | 11 | 44  | 30  | 23  | 10 no description                                                                                                         |
| P28660                         | 0.338225522  | 15  | 9   | 9   | 0  | 17  | 12  | 6   | 18 Nek-associated protein 1 OS=Mus musculus GN=Nkap1 PE=1 SV=1                                                            |
| A2AS98                         | 0.338225522  | 15  | 9   | 9   | 0  | 17  | 12  | 6   | 18 Nek-associated protein 1 OS=Mus musculus GN=Nkap1 PE=1 SV=2                                                            |
| P19096                         | 0.951521481  | 311 | 209 | 276 | 79 | 325 | 252 | 185 | 282 Tyrosine tyrosinase OS=Mus musculus GN=Tyap PE=1 SV=2                                                                 |
| Q9QZB7                         | 0.164964233  | 4   | 3   | 3   | 0  | 4   | 0   | 0   | 0 Actin-related protein 10 OS=Mus musculus GN=Actr10 PE=1 SV=2                                                            |
| Q9JL18                         | 0.441094296  | 4   | 3   | 3   | 0  | 0   | 0   | 0   | 4 Squamous cell carcinoma antigen recognized by T-cells 3 OS=Mus musculus GN=Sart3 PE=1 SV=1                              |
| Q8K1R3                         | 0.441094296  | 4   | 3   | 3   | 0  | 0   | 0   | 0   | 4 Pyruvate kinase OS=Mus musculus GN=Pdkk PE=1 SV=1                                                                       |
| Q62814                         | 0.240437566  | 9   | 5   | 11  | 0  | 10  | 8   | 0   | 13 Tyrosine tyrosinase A brain isoform OS=Mus musculus GN=Agp61b2 PE=1 SV=1                                               |
| P27659                         | 0.232591345  | 73  | 45  | 62  | 15 | 75  | 52  | 50  | 57 60S ribosomal protein L3 OS=Mus musculus GN=Rpl3 PE=1 SV=3                                                             |
| Q9JK38                         | 0.537293555  | 2   | 0   | 3   | 0  | 3   | 0   | 0   | 0 Glucosamine 6-phosphate N-acetyltransferase OS=Mus musculus GN=Gnpa11 PE=1 SV=1                                         |
| E22456                         | 0.598979449  | 0   | 2   | 3   | 0  | 0   | 0   | 0   | 0 NADH-cytochrome b5 reductase OS=Mus musculus GN=Cyb5b3 PE=1 SV=1                                                        |
| Q62204                         | 0.7          |     |     |     |    |     |     |     |                                                                                                                           |

|            |             |      |     |     |     |      |     |     |      |                                                                                                             |                                                                              |
|------------|-------------|------|-----|-----|-----|------|-----|-----|------|-------------------------------------------------------------------------------------------------------------|------------------------------------------------------------------------------|
| D3U75      | 0.93100761  | 4    | 2   | 7   | 0   | 5    | 5   | 0   | 5    | Translationaly-controlled tumor protein OS=Mus musculus GN=Tp1 PE=1 SV=1                                    |                                                                              |
| Q9JW9      | 0.8955703   | 12   | 9   | 5   | 0   | 7    | 10  | 0   | 13   | Ras-related protein Raf-B OS=Mus musculus GN=RafB PE=1 SV=1                                                 |                                                                              |
| B2X54      | 0.87885465  | 52   | 33  | 38  | 8   | 46   | 31  | 8   | 14   | Plexin-B2 OS=Mus musculus GN=Plexin2 PE=1 SV=1                                                              |                                                                              |
| Q90Z8      | 0.43699836  | 13   | 20  | 20  | 6   | 17   | 20  | 14  | 17   | Core histone macro-H2A.1 OS=Mus musculus GN=H2afy1 PE=1 SV=3                                                |                                                                              |
| AOA1DSRLW5 | 0.210136213 | 13   | 15  | 13  | 0   | 13   | 18  | 15  | 17   | 60S ribosomal protein L18a OS=Mus musculus GN=Rpl18a PE=1 SV=1                                              |                                                                              |
| Q6ZW26     | 0.974726714 | 26   | 15  | 27  | 5   | 22   | 20  | 15  | 27   | Eukaryotic translation initiation factor 2 subunit OS=Mus musculus GN=Elf2a1 PE=1 SV=3                      |                                                                              |
| PS4754     | 0.02975873  | 0    | 0   | 5   | 0   | 5    | 7   | 5   | 6    | Ephrin type-B receptor 3 OS=Mus musculus GN=Ephb3 PE=1 SV=2                                                 |                                                                              |
| FGWH07     | 0.04326915  | 5    | 0   | 0   | 0   | 0    | 0   | 0   | 7    | Glutamate S-transferase Mu.1 (Fragment) OS=Mus musculus GN=Gsm1 PE=1 SV=1                                   |                                                                              |
| O55229     | 0.757372828 | 24   | 18  | 26  | 6   | 27   | 19  | 13  | 26   | Coatomer subunit beta' OS=Mus musculus GN=Copb2 PE=1 SV=2                                                   |                                                                              |
| O9N9B9     | 0.802221708 | 56   | 33  | 52  | 7   | 46   | 29  | 39  | 56   | Splicing factor 3B subunit 1 OS=Mus musculus GN=SF3b1 PE=1 SV=1                                             |                                                                              |
| G56366     | 0.802221708 | 56   | 33  | 52  | 7   | 46   | 29  | 39  | 56   | Splicing factor 3B subunit 1 OS=Mus musculus GN=SF3b1 PE=1 SV=1                                             |                                                                              |
| AOA1DSRME4 | 0.142139849 | 12   | 11  | 0   | 0   | 13   | 14  | 3   | 12   | 60S ribosomal protein L18a (Fragment) OS=Mus musculus GN=Rpl18a PE=1 SV=1                                   |                                                                              |
| P16858     | 0.501994244 | 137  | 109 | 132 | 59  | 182  | 133 | 74  | 112  | Glyceraldehyde-3-phosphate dehydrogenase OS=Mus musculus GN=Gadph PE=1 SV=2                                 |                                                                              |
| P70333     | 0.591305889 | 13   | 9   | 15  | 4   | 18   | 8   | 9   | 12   | Heterogeneous nuclear ribonucleoprotein H2 OS=Mus musculus GN=Hnrh2 PE=1 SV=1                               |                                                                              |
| P11499     | 0.684884497 | 354  | 279 | 321 | 81  | 353  | 288 | 214 | 331  | Heat shock protein HSP 90-beta OS=Mus musculus GN=Hsp90b1 PE=1 SV=3                                         |                                                                              |
| P17183     | 0.081115609 | 23   | 10  | 12  | 4   | 13   | 5   | 0   | 15   | Gammacystallin OS=Mus musculus GN=Gct PE=1 SV=2                                                             |                                                                              |
| P61089     | 0.272414781 | 11   | 5   | 5   | 0   | 5    | 0   | 0   | 7    | Ubiquitin-conjugating enzyme E2 N OS=Mus musculus GN=Ube2n PE=1 SV=1                                        |                                                                              |
| Q8C1E6     | 0.929327547 | 77   | 62  | 68  | 10  | 78   | 67  | 36  | 67   | Coatomer subunit alpha OS=Mus musculus GN=Copa PE=1 SV=2                                                    |                                                                              |
| Q9RO07     | 0.949542469 | 7    | 6   | 8   | 0   | 9    | 7   | 0   | 8    | Prostaglandin E synthase 3 OS=Mus musculus GN=Pge3 PE=1 SV=1                                                |                                                                              |
| D3Z7C6     | 0.949542469 | 7    | 6   | 8   | 0   | 9    | 7   | 0   | 8    | Prostaglandin E synthase 3 OS=Mus musculus GN=Pge3 PE=1 SV=1                                                |                                                                              |
| Q8BF04     | 0.970024987 | 37   | 25  | 37  | 7   | 30   | 27  | 24  | 39   | WD repeat-containing protein 82 OS=Mus musculus GN=Wdr82 PE=1 SV=1                                          |                                                                              |
| H3BKR2     | 0.907641808 | 47   | 35  | 37  | 8   | 40   | 32  | 32  | 41   | Guanine nucleotide-binding protein G(I)G(S)G(T) subunit beta.1 (Fragment) OS=Mus musculus GN=Gnb1 PE=1 SV=8 |                                                                              |
| P27661     | 0.931170099 | 147  | 90  | 111 | 35  | 114  | 83  | 116 | 124  | Histone H2A.X OS=Mus musculus GN=H2afx PE=1 SV=2                                                            |                                                                              |
| Q92169715  | 0.924586159 | 41   | 29  | 32  | 5   | 32   | 26  | 6   | 43   | Serine/threonine-protein phosphatase PPL-gamma-ribosomal subunit OS=Mus musculus GN=Ppp1c PE=1 SV=1         |                                                                              |
| O5EBF8     | 0.406496228 | 20   | 21  | 22  | 10  | 25   | 21  | 16  | 21   | Heterogeneous nuclear ribonucleoprotein A1 OS=Mus musculus GN=Hnra1 PE=1 SV=1                               |                                                                              |
| Q9Z2X1     | 0.253000756 | 12   | 11  | 16  | 0   | 23   | 12  | 11  | 13   | Heterogeneous nuclear ribonucleoprotein C OS=Mus musculus GN=Hnrc1 PE=1 SV=3                                |                                                                              |
| Q3V4D5     | 0.47731691  | 6    | 4   | 0   | 0   | 0    | 6   | 6   | 5    | N-acetyltransferase ARD1 homolog (S. cerevisiae), isoform CRA_b OS=Mus musculus GN=Naa10 PE=1 SV=1          |                                                                              |
| B1AUZ1     | 0.47731691  | 6    | 4   | 0   | 0   | 0    | 6   | 6   | 5    | N-acetyltransferase ARD1 homolog (S. cerevisiae), isoform CRA_b OS=Mus musculus GN=Naa10 PE=1 SV=1          |                                                                              |
| B1AU99     | 0.47731691  | 6    | 4   | 0   | 0   | 0    | 6   | 6   | 5    | N-alpha-acetyltransferase 10 OS=Mus musculus GN=Naa10 PE=1 SV=1                                             |                                                                              |
| P63323     | 0.345710184 | 15   | 15  | 9   | 6   | 18   | 15  | 6   | 12   | 40S ribosomal protein S12 OS=Mus musculus GN=Rps12 PE=1 SV=2                                                |                                                                              |
| Q67874     | 0.918789567 | 7    | 0   | 8   | 0   | 8    | 9   | 0   | 9    | Keratin, type I cytoskeletal 18 OS=Mus musculus GN=Krt18 PE=1 SV=5                                          |                                                                              |
| Q61820     | 0.82169606  | 6    | 50  | 47  | 5   | 52   | 41  | 3   | 47   | GTP binding protein Ran, testis-specific isoform OS=Mus musculus GN=Raad2 PE=2 SV=1                         |                                                                              |
| AOA1DSRDL8 | 0.47788818  | 126  | 103 | 127 | 59  | 169  | 122 | 74  | 105  | Glyceraldehyde-3-phosphate dehydrogenase OS=Mus musculus GN=Gadph PE=1 SV=1                                 |                                                                              |
| Q6ZW26     | 0.361038106 | 18   | 17  | 13  | 6   | 21   | 20  | 10  | 14   | 40S ribosomal protein S12 OS=Mus musculus GN=Rps12 PE=1 SV=2                                                |                                                                              |
| O3TPP8     | 0.794371976 | 8    | 7   | 14  | 2   | 7    | 8   | 10  | 10   | Cytoplasmic dynein 1 intermediate chain 2 OS=Mus musculus GN=Dync1l2 PE=1 SV=1                              |                                                                              |
| OK8487     | 0.794371976 | 8    | 7   | 14  | 2   | 7    | 8   | 10  | 12   | Cytoplasmic dynein 1 intermediate chain 2 OS=Mus musculus GN=Dync1l2 PE=1 SV=1                              |                                                                              |
| A2BF99     | 0.794371976 | 8    | 7   | 14  | 2   | 7    | 8   | 10  | 10   | Cytoplasmic dynein 1 intermediate chain 2 OS=Mus musculus GN=Dync1l2 PE=1 SV=1                              |                                                                              |
| A2BFF8     | 0.794371976 | 8    | 7   | 14  | 2   | 7    | 8   | 10  | 10   | Cytoplasmic dynein 1 intermediate chain 2 OS=Mus musculus GN=Dync1l2 PE=1 SV=1                              |                                                                              |
| A2BFF5     | 0.794371976 | 8    | 7   | 14  | 2   | 7    | 8   | 10  | 10   | Cytoplasmic dynein 1 intermediate chain 2 OS=Mus musculus GN=Dync1l2 PE=1 SV=1                              |                                                                              |
| F7C132     | 0.103022405 | 17   | 12  | 12  | 6   | 16   | 13  | 8   | 16   | Endoplasmic (Fragment) OS=Mus musculus GN=Hsp90b1 PE=1 SV=1                                                 |                                                                              |
| Q6Z764     | 0.525297953 | 12   | 11  | 0   | 0   | 13   | 17  | 3   | 16   | 40S ribosomal protein S14 OS=Mus musculus GN=Rps14 PE=1 SV=3                                                |                                                                              |
| P05201     | 0.021068069 | 2    | 0   | 0   | 0   | 3    | 2   | 2   | 2    | Aspartate aminotransferase, cytoplasmic OS=Mus musculus GN=Got1 PE=1 SV=3                                   |                                                                              |
| P59708     | 0.027736255 | 0    | 6   | 6   | 0   | 6    | 8   | 7   | 6    | Splicing factor 3B subunit 1 OS=Mus musculus GN=SF3b1 PE=1 SV=1                                             |                                                                              |
| D3YW8T     | 0.101888632 | 0    | 4   | 0   | 0   | 4    | 4   | 5   | 5    | Dihydropteridine reductase OS=Mus musculus GN=Qdpr PE=1 SV=1                                                |                                                                              |
| AOA0G2K01  | 0.101888632 | 0    | 4   | 0   | 0   | 4    | 4   | 5   | 5    | Dihydropteridine reductase OS=Mus musculus GN=Qdpr PE=1 SV=1                                                |                                                                              |
| AOA0G2K01  | 0.101888632 | 0    | 4   | 0   | 0   | 4    | 4   | 5   | 5    | Dihydropteridine reductase OS=Mus musculus GN=Qdpr PE=1 SV=1                                                |                                                                              |
| Q8BV14     | 0.101888632 | 0    | 4   | 0   | 0   | 4    | 4   | 5   | 5    | Dihydropteridine reductase OS=Mus musculus GN=Qdpr PE=1 SV=1                                                |                                                                              |
| P97379     | 0.150746139 | 3    | 0   | 5   | 0   | 3    | 7   | 6   | 2    | Ras GTPase-activating protein-binding protein 2 OS=Mus musculus GN=G3bp2 PE=1 SV=2                          |                                                                              |
| OK8952     | 0.244809014 | 4    | 0   | 4   | 0   | 3    | 3   | 8   | 4    | Protein lin-7 homolog C OS=Mus musculus GN=Lin7c PE=1 SV=2                                                  |                                                                              |
| E9Q4T8     | 0.280056052 | 6    | 3   | 3   | 4   | 0    | 0   | 5   | 4    | Cullin-3 OS=Mus musculus GN=Cul3 PE=1 SV=1                                                                  |                                                                              |
| Q9JLV5     | 0.280056052 | 6    | 3   | 3   | 4   | 0    | 0   | 5   | 4    | Cullin-3 OS=Mus musculus GN=Cul3 PE=1 SV=1                                                                  |                                                                              |
| Q3JUF7     | 0.534694257 | 4    | 0   | 0   | 0   | 0    | 5   | 0   | 4    | 5-methylguanosine phosphate-specific 5'-nucleotidase OS=Mus musculus GN=N5c3b PE=1 SV=3                     |                                                                              |
| AOA0P4146  | 0.534694257 | 4    | 0   | 0   | 0   | 0    | 5   | 0   | 4    | 5-methylguanosine phosphate-specific 5'-nucleotidase OS=Mus musculus GN=N5c3b PE=1 SV=3                     |                                                                              |
| O9P167     | 0.774322215 | 19   | 12  | 13  | 4   | 13   | 17  | 7   | 17   | 16S ribosomal protein L21 OS=Mus musculus GN=Rpl21 PE=1 SV=3                                                |                                                                              |
| O9CQM8     | 0.774322215 | 19   | 12  | 13  | 4   | 13   | 17  | 7   | 17   | 16S ribosomal protein L21 OS=Mus musculus GN=Rpl21 PE=1 SV=3                                                |                                                                              |
| P61027     | 0.875462676 | 8    | 0   | 9   | 7   | 18   | 5   | 7   | 6    | Ras-related protein Rab-10 OS=Mus musculus GN=Rab10 PE=1 SV=1                                               |                                                                              |
| AOA0PPYLD5 | 0.244318728 | 4    | 4   | 6   | 0   | 7    | 5   | 4   | 5    | Protein Nup205 OS=Mus musculus GN=Nup205 PE=1 SV=1                                                          |                                                                              |
| B9EJ54     | 0.244318728 | 4    | 4   | 6   | 0   | 7    | 5   | 4   | 5    | MCCG1756, isoform CRA_b OS=Mus musculus GN=Nup205 PE=1 SV=1                                                 |                                                                              |
| O9DOW5     | 0.185908554 | 3    | 3   | 2   | 0   | 3    | 0   | 0   | 0    | 0                                                                                                           | Peptidyl-prolyl cis-trans isomerase-like 1 OS=Mus musculus GN=Ppi1 PE=1 SV=1 |
| D32645     | 0.789474356 | 19   | 10  | 18  | 2   | 16   | 16  | 11  | 11   | Vacuolar protein sorting-associated protein 29 OS=Mus musculus GN=Vps29 PE=1 SV=1                           |                                                                              |
| D32YD25    | 0.789474356 | 19   | 10  | 18  | 2   | 16   | 16  | 11  | 12   | Vacuolar protein sorting-associated protein 29 (Fragment) OS=Mus musculus GN=Vps29 PE=1 SV=1                |                                                                              |
| O9Z888     | 0.789474356 | 19   | 10  | 18  | 2   | 16   | 16  | 11  | 11   | (Fragment) OS=Mus musculus GN=Vps29 PE=1 SV=1                                                               |                                                                              |
| P10853     | 0.544549303 | 264  | 184 | 253 | 95  | 220  | 227 | 219 | 227  | Histone H2B type 1-F/LL OS=Mus musculus GN=Hist1h2bf PE=1 SV=2                                              |                                                                              |
| P49312     | 0.307397255 | 20   | 26  | 22  | 10  | 25   | 21  | 16  | 21   | Heterogeneous nuclear ribonucleoprotein A1 OS=Mus musculus GN=Hnra1 PE=1 SV=2                               |                                                                              |
| Q9JLV5     | 0.942458587 | 6    | 3   | 3   | 2   | 4    | 0   | 4   | 32   | 40S ribosomal protein S5 OS=Mus musculus GN=Rps5 PE=1 SV=1                                                  |                                                                              |
| Q8CGP2     | 0.535974232 | 264  | 184 | 253 | 95  | 220  | 227 | 218 | 227  | Histone H2B type 1-P OS=Mus musculus GN=Hist1h2bp PE=1 SV=3                                                 |                                                                              |
| P10854     | 0.516902745 | 264  | 183 | 252 | 95  | 218  | 224 | 217 | 227  | Histone H2B type 1-M OS=Mus musculus GN=Hist1h2bm PE=1 SV=2                                                 |                                                                              |
| P47856     | 0.315632102 | 14   | 12  | 11  | 0   | 12   | 14  | 12  | 12   | Gamma-L-glutamate-fructose-6-phosphate aminotransferase [isomerizing] 1 OS=Mus musculus GN=Gfpt1 PE=1 SV=3  |                                                                              |
| Q67445     | 0.515893134 | 265  | 186 | 254 | 96  | 220  | 227 | 219 | 227  | Histone H2B type 1-B OS=Mus musculus GN=Hist1h2bb PE=1 SV=3                                                 |                                                                              |
| P97461     | 0.962794444 | 46   | 36  | 33  | 9   | 31   | 34  | 41  | 32   | 40S ribosomal protein S5 (Fragment) OS=Mus musculus GN=Rps5 PE=1 SV=1                                       |                                                                              |
| D3YVM6     | 0.967681259 | 46   | 36  | 33  | 9   | 32   | 33  | 41  | 32   | 40S ribosomal protein S5 (Fragment) OS=Mus musculus GN=Rps5 PE=1 SV=1                                       |                                                                              |
| D3Z1S8     | 0.967681259 | 46   | 36  | 33  | 9   | 32   | 33  | 41  | 32   | 40S ribosomal protein S5 (Fragment) OS=Mus musculus GN=Rps5 PE=1 SV=1                                       |                                                                              |
| FXW1X8     | 0.707961606 | 133  | 94  | 115 | 31  | 106  | 96  | 98  | 115  | Histone H2A OS=Mus musculus GN=Hist1h2a PE=1 SV=1                                                           |                                                                              |
| Q64852     | 0.707961606 | 133  | 94  | 115 | 31  | 106  | 96  | 98  | 115  | Histone H2A type 2-C OS=Mus musculus GN=Hist2ac PE=1 SV=3                                                   |                                                                              |
| Q9JFF7     | 0.961761946 | 20   | 16  | 9   | 20  | 16   | 0   | 0   | 14   | Coatomer subunit beta OS=Mus musculus GN=Copb1 PE=1 SV=1                                                    |                                                                              |
| P12815     | 0.004613724 | 20   | 7   | 12  | 6   | 18   | 6   | 8   | 8    | Programmed cell death protein 6 OS=Mus musculus GN=Pdc6 PE=1 SV=2                                           |                                                                              |
| P97315     | 0.346825715 | 0    | 3   | 0   | 0   | 4    | 2   | 0   | 4    | Cysteine and glycine-rich protein 1 OS=Mus musculus GN=Cgrp1 PE=1 SV=3                                      |                                                                              |
| Q6G5S7     | 0.690000049 | 133  | 95  | 115 | 31  | 106  | 96  | 98  | 115  | Histone H2A type 2-A OS=Mus musculus GN=Hist2aa PE=1 SV=3                                                   |                                                                              |
| D3YVM5     | 0.767631323 | 56   | 46  | 42  | 13  | 43   | 38  | 40  | 53   | 60S acidic ribosomal protein P0 (Fragment) OS=Mus musculus GN=Rplp0 PE=1 SV=1                               |                                                                              |
| P62827     | 0.171603281 | 211  | 183 | 69  | 63  | 228  | 160 | 123 | 182  | GTP-binding nuclear protein Ran OS=Mus musculus GN=Ran PE=1 SV=3                                            |                                                                              |
| Q60770     | 0.329299995 | 9    | 0   | 0   | 0   | 7    | 7   | 6   | 8    | Syntaxin-binding protein 3 OS=Mus musculus GN=Stxbp3 PE=1 SV=1                                              |                                                                              |
| O5V8V4     | 0.264085611 | 7    | 92  | 101 | 29  | 125  | 90  | 73  | 109  | Histone H2A OS=Mus musculus GN=Hist1h2a PE=1 SV=1                                                           |                                                                              |
| P47963     | 0.223486557 | 15   | 9   | 10  | 5   | 12   | 11  | 7   | 13   | 60S ribosomal protein L13 OS=Mus musculus GN=Rpl13 PE=1 SV=3                                                |                                                                              |
| A2A9X5     | 0.980422381 | 3    | 4   | 4   | 0   | 4    | 5   | 0   | 2    | 5'(3')-deoxyribonucleotidase, cytosolic type OS=Mus musculus GN=N5c PE=1 SV=1                               |                                                                              |
| P84228     | 0.428887145 | 79   | 58  | 74  | 25  | 97   | 56  | 54  | 53   | Histone H3 OS=Mus musculus GN=Hist1h3b PE=1 SV=2                                                            |                                                                              |
| Q6Z073     | 0.286730464 | 7    | 4   | 4   | 0   | 7    | 4   | 0   | 5    | Cullin-associated protein 1 OS=Mus musculus GN=Cand2 PE=1 SV=2                                              |                                                                              |
| P45376     | 0.95063047  | 88   | 72  | 93  | 17  | 58   | 68  | 85  | 86   | Aldose reductase OS=Mus musculus GN=Akr1b1 PE=1 SV=3                                                        |                                                                              |
| P10630     | 0.990512299 | 33   | 21  | 32  | 4   | 27   | 28  | 16  | 28   | Eukaryotic initiation factor 4A-II OS=Mus musculus GN=Elf4a2 PE=1 SV=2                                      |                                                                              |
| B1ARA5     | 0.438331886 | 16   | 17  | 22  | 7   | 25   | 13  | 13  | 17   | 60S ribosomal protein L26 OS=Mus musculus GN=Rpl26 PE=1 SV=1                                                |                                                                              |
| Q9Y8B4     | 0.455382151 | 10   | 8   | 13  | 8   | 13   | 8   | 8   | 13   | E1H domain-containing protein 2 OS=Mus musculus GN=Eda2 PE=1 SV=1                                           |                                                                              |
| P70696     | 0.490217415 | 214  | 165 | 214 | 94  | 170  | 199 | 192 | 191  | Histone H2B type 1-A OS=Mus musculus GN=Hist1h2ba PE=1 SV=1                                                 |                                                                              |
| O9JMI1     | 0.017470515 | 0    | 7   | 9   | 0   | 8    | 10  | 10  | 9    | Ubiquitin-like nucleoside transporter 1 OS=Mus musculus GN=Slc29a1 PE=1 SV=3                                |                                                                              |
| Q6O967     | 0.242598565 | 9    | 7   | 8   | 0   | 7    | 10  | 9   | 9    | Riboflavin-3-phosphoadenosine 5'-phosphotransylase 1 OS=Mus musculus GN=Papsa1 PE=1 SV=1                    |                                                                              |
| Q60710     | 0.309405752 | 1105 | 936 | 992 | 449 | 1057 | 887 | 882 | 1093 | Actin, cytoplasmic OS=Mus musculus GN=Act PE=1 SV=1                                                         |                                                                              |
| P57722     | 0.169674666 | 15   | 11  | 13  | 5   | 16   | 11  | 0   | 9    | Poly(C)-binding protein 3 OS=Mus musculus GN=Pcbp3 PE=1 SV=3                                                |                                                                              |
| Q9JUZ9     | 0.998273176 | 4    | 3   | 4   | 0   | 4    | 3   | 0   | 5    | Phospholipid scramblase 3 OS=Mus musculus GN=Pscr3 PE=1 SV=1                                                |                                                                              |
| O5F284     | 0.998273176 | 4    | 3   | 4   | 0   | 4    | 3   | 0   | 5    | Phospholipid scramblase (Fragment) OS=Mus musculus GN=Pscr3 PE=1 SV=1                                       |                                                                              |
| Q9Y3V6     | 0.739069691 | 20   | 27  | 25  | 6   | 26   | 15  | 21  | 23   | Septin-1 OS=Mus musculus GN=Scpt1 PE=1 SV=1                                                                 |                                                                              |
| AOA0G2K01  | 0.787991822 | 33   | 23  | 30  | 3   | 28   | 15  | 21  | 32   | Serine/threonine-protein phosphatase OS=Mus musculus GN=Ppp1c PE=1 SV=1                                     |                                                                              |
| Q3UH60     | 0.078852338 | 7    | 6   | 7   | 3   | 5    | 5   | 5   | 10   | Disco-interacting protein 2 homolog B OS=Mus musculus GN=Dip2b PE=1 SV=1                                    |                                                                              |
| P41105     | 0.254672008 | 17   | 10  | 9   | 0   | 16   | 12  | 11  | 13   | 60S ribosomal protein L28 OS=Mus musculus GN=Rpl28 PE=1 SV=2                                                |                                                                              |
| Q9VVA3     | 0.184680969 | 46   | 36  | 39  | 12  | 48   | 40  | 21  | 25   | Mitotic checkpoint protein BRB3 OS=Mus musculus GN=Bub3 PE=1 SV=2                                           |                                                                              |
| AOA140LHA2 | 0.184680969 | 46   | 36  | 39  | 12  | 48   | 40  | 21  | 25   | Mitotic checkpoint protein BRB3 OS=Mus musculus GN=Bub3 PE=1 SV=2                                           |                                                                              |
| E9CQY2     | 0.185102563 | 0    | 0   | 4   | 0   | 0    | 5   | 3   | 3    | NudC domain-containing protein 2 OS=Mus musculus GN=Nudec2 PE=1 SV=1                                        |                                                                              |
| Q9CQ48     | 0.185102563 | 0    | 0   | 4   | 0   | 0    | 5   | 3   | 3    | NudC domain-containing protein 2 OS=Mus musculus GN=Nudec2 PE=1 SV=1                                        |                                                                              |
| H3BHX4     | 0.40140763  | 0    | 3   | 5   | 0   | 6    | 3   | 4   | 0    | Neuroplastin (Fragment) OS=Mus musculus GN=Nptn PE=1 SV=1                                                   |                                                                              |
| Z4YLB7     | 0.40140763  | 0    | 3   | 5   | 0   | 6    | 3   | 4   | 0    | Neuroplastin OS=Mus musculus GN=Nptn PE=1 SV=1                                                              |                                                                              |
| P97300     | 0.40140763  | 0    | 3   | 5   | 0   | 6    | 3   |     |      |                                                                                                             |                                                                              |

|                        |             |     |     |     |     |     |     |     |                                                                                                                          |
|------------------------|-------------|-----|-----|-----|-----|-----|-----|-----|--------------------------------------------------------------------------------------------------------------------------|
| F8WHM5                 | 0.464117936 | 4   | 3   | 4   | 0   | 4   | 3   | 3   | 5 Golgi apparatus protein 1 (Fragment) OS=Mus musculus GN-Glg1 PE=1 SV=1                                                 |
| Q61543                 | 0.464117936 | 4   | 3   | 4   | 0   | 4   | 3   | 3   | 5 Golgi apparatus protein 1 OS=Mus musculus GN-Glg1 PE=1 SV=1                                                            |
| E9Q555                 | 0.165871116 | 17  | 17  | 10  | 5   | 13  | 13  | 8   | 16 E3 ubiquitin-protein ligase RNF13 OS=Mus musculus GN-Rnf13 PE=1 SV=2                                                  |
| AA0A17IEBL2            | 0.165871116 | 17  | 17  | 10  | 5   | 13  | 13  | 8   | 16 E3 ubiquitin-protein ligase RNF13 OS=Mus musculus GN-Rnf13 PE=1 SV=2                                                  |
| Q64377                 | 0.234896263 | 40  | 25  | 29  | 6   | 37  | 21  | 18  | 28 Tripartite nuclear bivalent protein complex OS=Mus musculus GN-Gart PE=1 SV=3                                         |
| D3Z0Y2                 | 0.353945584 | 26  | 16  | 22  | 3   | 18  | 18  | 0   | 15 Peroxiredoxin-6 OS=Mus musculus GN-Prd6 PE=1 SV=1                                                                     |
| P65899                 | 0.205077118 | 20  | 18  | 22  | 10  | 21  | 12  | 17  | 21 60S ribosomal protein L30 OS=Mus musculus GN-Rpl30 PE=1 SV=2                                                          |
| Q60668                 | 0.183230781 | 8   | 8   | 8   | 2   | 4   | 4   | 0   | 5 Heterogeneous nuclear ribonucleoprotein D0 OS=Mus musculus GN-Hnrpdd0 PE=1 SV=2                                        |
| P42208                 | 0.508182543 | 22  | 30  | 26  | 7   | 27  | 15  | 21  | 23 Septin-2 OS=Mus musculus GN-Sept2 PE=1 SV=2                                                                           |
| A3KFLU5                | 0.376058296 | 10  | 5   | 11  | 0   | 15  | 7   | 6   | 7 Polyadenylation-binding protein OS=Mus musculus GN-Pabp4 PE=1 SV=1                                                     |
| Q9J9J5                 | 0.390036093 | 52  | 25  | 28  | 0   | 43  | 26  | 18  | 27 Tubulin-interacting nephritis antigen-like OS=Mus musculus GN-Tinagl1 PE=1 SV=1                                       |
| G3XW99                 | 0.026062825 | 0   | 0   | 0   | 0   | 5   | 12  | 1   | 4 Proteasome activator complex subunit 1 OS=Mus musculus GN-Pact1 PE=1 SV=1                                              |
| O55234                 | 0.122012939 | 4   | 0   | 2   | 3   | 0   | 0   | 0   | 3 Proteasome subunit type-5 OS=Mus musculus GN-Psm5 PE=1 SV=3                                                            |
| P24668                 | 0.142575347 | 11  | 8   | 11  | 0   | 14  | 9   | 10  | 7 Cation-dependent mannose-6-phosphate receptor OS=Mus musculus GN-M6pr PE=1 SV=1                                        |
| A3KGK7                 | 0.201149384 | 3   | 2   | 0   | 0   | 3   | 2   | 0   | 0 Copine-1 (Fragment) OS=Mus musculus GN-Cpine1 PE=1 SV=1                                                                |
| Q9C3E9                 | 0.183260954 | 13  | 16  | 12  | 13  | 12  | 13  | 10  | 12 Sirtuin-like protein domain-containing protein 1 OS=Mus musculus GN-Snd1 PE=1 SV=1                                    |
| AA0A06VWGR             | 0.236220404 | 10  | 7   | 12  | 3   | 9   | 8   | 0   | 7 Actin-like protein 6A (Fragment) OS=Mus musculus GN-Act6a PE=1 SV=1                                                    |
| D3Z7P0                 | 0.262651447 | 0   | 0   | 3   | 0   | 0   | 2   | 2   | 5 BRCA1-A complex subunit BRE OS=Mus musculus GN-Bre PE=1 SV=3                                                           |
| G5E896                 | 0.284393425 | 3   | 2   | 4   | 0   | 0   | 3   | 0   | 0 Enhancer of mRNA decapping 4, isoform CRA_b OS=Mus musculus GN-Edc4 PE=1 SV=1                                          |
| AA0A04H1Q0             | 0.284393425 | 3   | 2   | 4   | 0   | 0   | 3   | 0   | 0 Enhancer of mRNA decapping protein 4 OS=Mus musculus GN-Edc4 PE=1 SV=1                                                 |
| Q3UBJ9                 | 0.284393425 | 3   | 2   | 4   | 0   | 0   | 3   | 0   | 0 Enhancer of mRNA decapping protein 4 OS=Mus musculus GN-Edc4 PE=1 SV=2                                                 |
| Q99L62                 | 0.311114306 | 7   | 7   | 4   | 0   | 2   | 6   | 0   | 4 5 Transportin-2 OS=Mus musculus GN-Tapo2 PE=1 SV=1                                                                     |
| AA0A02GZ29             | 0.328460839 | 18  | 14  | 12  | 8   | 11  | 12  | 13  | 16 40S ribosomal protein S27 OS=Mus musculus GN-Rps27 PE=1 SV=1                                                          |
| Q6Z9Q9                 | 0.320794993 | 7   | 4   | 8   | 5   | 5   | 5   | 0   | 7 MCC5 OS=Mus musculus GN-Mhl2a PE=1 SV=1                                                                                |
| Q91VR8                 | 0.331820455 | 0   | 4   | 4   | 0   | 0   | 4   | 0   | 0 Protein BRICK1 OS=Mus musculus GN-Bbk1 PE=1 SV=1                                                                       |
| contaminant_GR78_HUMAN | 0.340267783 | 34  | 20  | 26  | 8   | 29  | 28  | 8   | 23 owlP110211 78 KD GLUCOSE REGULATED PROTEIN PRECURSOR (GRP 78) (IMMUNOGLOBULIN...                                      |
| contaminant_GR78_MESAU | 0.340267783 | 34  | 20  | 26  | 8   | 29  | 28  | 8   | 23 owlP110211 78 KD GLUCOSE REGULATED PROTEIN PRECURSOR (GRP 78) (IMMUNOGLOBULIN...                                      |
| C3X1A7                 | 0.366084105 | 2   | 0   | 0   | 0   | 2   | 0   | 0   | 0 Eukaryotic translation initiation factor 4 gamma 2 OS=Mus musculus GN-Eif4g2 PE=1 SV=1                                 |
| F7CBP1                 | 0.366084105 | 2   | 0   | 2   | 0   | 2   | 0   | 0   | 0 Eukaryotic translation initiation factor 4 gamma 2 OS=Mus musculus GN-Eif4g2 PE=1 SV=1                                 |
| Q62448                 | 0.366084105 | 2   | 0   | 2   | 0   | 2   | 0   | 0   | 0 Eukaryotic translation initiation factor 4 gamma 2 OS=Mus musculus GN-Eif4g2 PE=1 SV=2                                 |
| P49722                 | 0.366773216 | 2   | 2   | 0   | 0   | 2   | 0   | 0   | 0 Proteasome subunit alpha type-2 OS=Mus musculus GN-Pact2 PE=1 SV=3                                                     |
| B1AW91                 | 0.391002219 | 3   | 0   | 0   | 0   | 0   | 3   | 0   | 0 Protein Kinase C activator kinase II OS=Mus musculus GN-Pkin3a3 PE=1 SV=8                                              |
| P5S281                 | 0.391002219 | 3   | 0   | 0   | 0   | 0   | 3   | 0   | 0 Dymin-like 120 kDa protein, mitochondrial OS=Mus musculus GN-Optal PE=1 SV=1                                           |
| Q8BH04                 | 0.391002219 | 3   | 0   | 0   | 0   | 0   | 3   | 0   | 0 Phosphoenolpyruvate carboxylase (GTP), mitochondrial OS=Mus musculus GN-Pck2 PE=1 SV=1                                 |
| AA0A0R4JG0             | 0.391002219 | 3   | 0   | 0   | 0   | 0   | 3   | 0   | 0 Phosphoenolpyruvate carboxylase [GTP], mitochondrial OS=Mus musculus GN-Pck2 PE=1 SV=1                                 |
| AA0A1B0G509            | 0.906429512 | 4   | 0   | 0   | 0   | 4   | 0   | 0   | 4 Tumor suppressor gene 101 protein (Fragment) OS=Mus musculus GN-Tsg101 PE=1 SV=1                                       |
| B1A4WD8                | 0.662691541 | 0   | 0   | 0   | 0   | 0   | 0   | 2   | 0 Clathrin light chain A OS=Mus musculus GN-Cla PE=1 SV=1                                                                |
| Q99K70                 | 0.662691541 | 0   | 0   | 0   | 0   | 0   | 0   | 8   | 0 Ras-related GTP-binding protein C OS=Mus musculus GN-Rage PE=1 SV=1                                                    |
| Q7TSV4                 | 0.680802004 | 2   | 0   | 2   | 0   | 0   | 2   | 0   | 0 Phosphoglucomutase-2 OS=Mus musculus GN-Pgm2 PE=1 SV=1                                                                 |
| P27612                 | 0.748382103 | 3   | 0   | 5   | 0   | 2   | 3   | 0   | 7 Phospholipase A-2-activating protein OS=Mus musculus GN-Pla2 PE=1 SV=4                                                 |
| Q9CDE3                 | 0.790432547 | 0   | 0   | 0   | 0   | 0   | 0   | 2   | 4 Tripartite nuclear bivalent protein complex 47 OS=Mus musculus GN-Tram7 PE=1 SV=2                                      |
| Q9CQ09                 | 0.808016376 | 13  | 0   | 0   | 0   | 0   | 0   | 13  | 0 Protein Rpl31 OS=Mus musculus GN-Rpl31 PE=1 SV=1                                                                       |
| Q3TU16                 | 0.849886839 | 0   | 2   | 0   | 0   | 2   | 0   | 0   | 0 Protein Rpl10a OS=Mus musculus GN-Rpl10a PE=1 SV=1                                                                     |
| AA0AD9VUM4             | 0.849886839 | 0   | 2   | 0   | 0   | 2   | 0   | 0   | 0 C-terminal-binding protein 1 OS=Mus musculus GN-Cbip1 PE=1 SV=1                                                        |
| Q91D65                 | 0.849886839 | 0   | 2   | 0   | 0   | 2   | 0   | 0   | 0 Perlecan OS=Mus musculus GN-Plec PE=1 SV=1                                                                             |
| O88712                 | 0.849886839 | 0   | 2   | 0   | 0   | 2   | 0   | 0   | 0 C-terminal-binding protein 1 OS=Mus musculus GN-Cbip1 PE=1 SV=2                                                        |
| AA0A0G2JG8             | 0.849886839 | 0   | 2   | 0   | 0   | 2   | 0   | 0   | 0 Protein Rpl10a OS=Mus musculus GN-Rpl10a PE=1 SV=1                                                                     |
| E9Q912                 | 0.849886839 | 0   | 2   | 0   | 0   | 2   | 0   | 0   | 0 Protein Rpl10a OS=Mus musculus GN-Rpl10a PE=1 SV=1                                                                     |
| E9Q604                 | 0.849886839 | 0   | 2   | 0   | 0   | 2   | 0   | 0   | 0 Protein Rpl10a OS=Mus musculus GN-Rpl10a PE=1 SV=1                                                                     |
| S4R2C4                 | 0.849886839 | 0   | 2   | 0   | 0   | 2   | 0   | 0   | 0 Son of sevenless homolog 2 OS=Mus musculus GN-Sox2 PE=1 SV=1                                                           |
| AA0A09YU62             | 0.849886839 | 0   | 2   | 0   | 0   | 2   | 0   | 0   | 0 C-terminal-binding protein 1 OS=Mus musculus GN-Cbip1 PE=1 SV=1                                                        |
| HB1V7                  | 0.858008374 | 3   | 5   | 0   | 0   | 5   | 0   | 0   | 3 Serine/threonine-protein phosphatase 2A 65 kDa regulatory subunit A beta isoform OS=Mus musculus GN-Ppp2r1b PE=1 SV=1  |
| J3QZ10                 | 0.893355577 | 0   | 3   | 0   | 0   | 0   | 3   | 0   | 2 Phosphatidylinositol transfer protein alpha isoform OS=Mus musculus GN-Pitpa PE=1 SV=2                                 |
| J3QPM1                 | 0.893355577 | 0   | 3   | 0   | 0   | 0   | 3   | 0   | 2 Phosphatidylinositol transfer protein alpha isoform OS=Mus musculus GN-Pitpa PE=1 SV=1                                 |
| P53810                 | 0.893355577 | 0   | 3   | 0   | 0   | 0   | 3   | 0   | 2 Phosphatidylinositol transfer protein alpha isoform OS=Mus musculus GN-Pitpa PE=1 SV=2                                 |
| AA0A02JF31             | 0.900140637 | 0   | 0   | 2   | 0   | 2   | 0   | 0   | 0 Thymidylate synthase (Fragment) OS=Mus musculus GN-Tyms PE=1 SV=1                                                      |
| QB1WU5                 | 0.900426338 | 0   | 0   | 0   | 0   | 0   | 0   | 2   | 2 Probable RNA N6-adenosine threonylcarbamoyltransferase OS=Mus musculus GN-Ogep PE=1 SV=2                               |
| EDCN99                 | 0.900426338 | 0   | 2   | 2   | 0   | 0   | 2   | 0   | 2 Probable RNA N6-adenosine threonylcarbamoyltransferase OS=Mus musculus GN-Ogep PE=1 SV=1                               |
| AA0A0R41Y3             | 0.900426338 | 0   | 2   | 2   | 0   | 0   | 2   | 0   | 2 Probable RNA N6-adenosine threonylcarbamoyltransferase OS=Mus musculus GN-Ogep PE=1 SV=1                               |
| G3LXU8                 | 0.906431553 | 4   | 5   | 7   | 0   | 4   | 5   | 0   | 4 Large proline-rich protein BAG6 (Fragment) OS=Mus musculus GN-Bag6 PE=1 SV=1                                           |
| Q9CY64                 | 0.906765346 | 4   | 3   | 7   | 0   | 0   | 4   | 0   | 0 Eukaryotic translation initiation factor 3 OS=Mus musculus GN-Eif3 PE=1 SV=1                                           |
| FXA111                 | 0.919995716 | 13  | 9   | 10  | 0   | 9   | 10  | 0   | 7 Exportin-1 (Fragment) OS=Mus musculus GN-Xpo1 PE=1 SV=1                                                                |
| Q9JJK2                 | 0.921450104 | 3   | 0   | 0   | 0   | 0   | 3   | 0   | 0 Lan-C-like protein 2 OS=Mus musculus GN-Lanc2 PE=1 SV=1                                                                |
| Q8B848                 | 0.921450104 | 2   | 0   | 0   | 0   | 0   | 2   | 0   | 0 Methionine aminopeptidase 1 OS=Mus musculus GN-Metap1 PE=1 SV=1                                                        |
| P48ZV6                 | 0.921450104 | 2   | 0   | 0   | 0   | 0   | 2   | 0   | 1 Lan-C-like protein 2 (Fragment) OS=Mus musculus GN-Lanc2 PE=1 SV=1                                                     |
| D6RE33                 | 0.921450104 | 3   | 0   | 0   | 0   | 0   | 3   | 0   | 0 Enhancer of mRNA decapping protein 4 OS=Mus musculus GN-Edc4 PE=1 SV=1                                                 |
| Q9CXY6                 | 0.921450104 | 3   | 0   | 0   | 0   | 0   | 3   | 0   | 0 Interleukin enhancer-binding factor 2 OS=Mus musculus GN-Ilf2 PE=1 SV=1                                                |
| Q9CT10                 | 0.928404866 | 0   | 2   | 0   | 0   | 0   | 2   | 0   | 2 Ran-binding protein 3 OS=Mus musculus GN-Ranbp3 PE=1 SV=2                                                              |
| PG2K30                 | 0.943602506 | 4   | 3   | 3   | 0   | 5   | 0   | 2   | 2 60S ribosomal protein L23 OS=Mus musculus GN-Rpl23 PE=1 SV=1                                                           |
| P61082                 | 0.951481756 | 6   | 3   | 3   | 0   | 5   | 0   | 0   | 0 NEDD8-conjugating enzyme Ube12 OS=Mus musculus GN-Ube12 PE=1 SV=1                                                      |
| F7CDT0                 | 0.951481756 | 6   | 3   | 3   | 0   | 3   | 4   | 0   | 5 NEDD8-conjugating enzyme Ube12 (Fragment) OS=Mus musculus GN-Ube2m PE=1 SV=1                                           |
| F6WMC0                 | 0.951765864 | 5   | 3   | 2   | 0   | 0   | 3   | 4   | 0 5 NEDD8-conjugating enzyme Ube12 (Fragment) OS=Mus musculus GN-Ube2m PE=1 SV=1                                         |
| O5SPX8                 | 0.955004947 | 0   | 0   | 3   | 0   | 0   | 0   | 0   | 3 TBC1 domain family member 10A OS=Mus musculus GN-Tbc10a PE=1 SV=1                                                      |
| F6W5Q8                 | 0.955004947 | 0   | 0   | 3   | 0   | 0   | 0   | 0   | 3 Vacuolar protein sorting-associated protein 13A1 homolog (Fragment) OS=Mus musculus GN-Vps13a PE=1 SV=1                |
| P58802                 | 0.958049947 | 0   | 0   | 3   | 0   | 0   | 0   | 0   | 3 TBC1 domain family member 10A OS=Mus musculus GN-Tbc10a PE=1 SV=1                                                      |
| Q9CR26                 | 0.958049947 | 0   | 0   | 3   | 0   | 0   | 0   | 0   | 3 Vacuolar protein sorting-associated protein VTA1 homolog OS=Mus musculus GN-Vta1 PE=1 SV=1                             |
| Q9QY33                 | 0.960634205 | 4   | 0   | 0   | 0   | 0   | 0   | 0   | 4 DnaJ homolog subfamily B member 1 OS=Mus musculus GN-Dnajb1 PE=1 SV=3                                                  |
| P70697                 | 0.966634205 | 3   | 0   | 0   | 0   | 0   | 0   | 3   | 3 Ubiquitin-conjugating enzyme E2 OS=Mus musculus GN-Ube2m PE=1 SV=2                                                     |
| Q3TYL7                 | 0.966634205 | 4   | 0   | 0   | 0   | 0   | 0   | 0   | 4 DnaJ homolog subfamily B member 1 OS=Mus musculus GN-Dnajb1 PE=1 SV=1                                                  |
| P62301                 | 0.983202751 | 5   | 5   | 6   | 0   | 5   | 0   | 5   | 6 40S ribosomal protein S13 OS=Mus musculus GN-Rps13 PE=1 SV=2                                                           |
| Q921R2                 | 0.983202751 | 5   | 5   | 6   | 0   | 5   | 0   | 5   | 6 40S ribosomal protein S13 OS=Mus musculus GN-Rps13 PE=1 SV=1                                                           |
| Q90631                 | 0.990631707 | 0   | 0   | 0   | 0   | 0   | 0   | 0   | 0 4-xylose 4-epimerase OS=Mus musculus GN-Xep1 PE=1 SV=3                                                                 |
| P68134                 | 0.277558431 | 814 | 671 | 736 | 396 | 621 | 640 | 643 | 711 Actin, alpha skeletal muscle OS=Mus musculus GN-Acta1 PE=1 SV=1                                                      |
| P68033                 | 0.271848296 | 823 | 675 | 742 | 397 | 629 | 644 | 644 | 711 Actin, alpha cardiac muscle 1 OS=Mus musculus GN-Actc1 PE=1 SV=1                                                     |
| O80709                 | 0.248368779 | 30  | 18  | 23  | 3   | 19  | 18  | 0   | 8 Peroxiredoxin-6 OS=Mus musculus GN-Prd6 PE=1 SV=3                                                                      |
| Q6GT24                 | 0.248368779 | 30  | 18  | 23  | 3   | 19  | 18  | 0   | 8 Peroxiredoxin-6 OS=Mus musculus GN-Prd6 PE=1 SV=3                                                                      |
| P08113                 | 0.006687119 | 29  | 23  | 26  | 9   | 25  | 20  | 14  | 27 Endoplasmic reticulum protein OS=Mus musculus GN-Hsp90b1 PE=1 SV=2                                                    |
| Q9CPY7                 | 0.110246711 | 48  | 49  | 49  | 17  | 53  | 34  | 25  | 49 Cytosol aminopeptidase OS=Mus musculus GN-Lap3 PE=1 SV=3                                                              |
| Q9R1P4                 | 0.402993733 | 7   | 8   | 4   | 0   | 5   | 9   | 5   | 6 Proteasome subunit alpha type-1 OS=Mus musculus GN-Pact1 PE=1 SV=1                                                     |
| Q11011                 | 0.584097293 | 18  | 18  | 17  | 4   | 17  | 14  | 14  | 21 Protein-serine/threonine phosphatase 2A 65 kDa regulatory subunit A beta isoform OS=Mus musculus GN-Ppp2r1b PE=1 SV=2 |
| Q9D662                 | 0.138023607 | 8   | 8   | 4   | 3   | 0   | 5   | 3   | 3 Protein transport protein Sec23B OS=Mus musculus GN-Sec23b PE=1 SV=1                                                   |
| P70441                 | 0.201281242 | 4   | 6   | 8   | 5   | 7   | 0   | 4   | 6 Na(+)/H(+) exchange regulatory cofactor NHE-RF1 OS=Mus musculus GN-Sle9a3r1 PE=1 SV=3                                  |
| R8BHF5                 | 0.271063517 | 16  | 10  | 15  | 5   | 11  | 13  | 10  | 0 Retinulin OS=Mus musculus GN-Rtn PE=1 SV=1                                                                             |
| D3YW98                 | 0.243328739 | 6   | 6   | 6   | 1   | 13  | 11  | 13  | 13 Vacuolar protein sorting-associated protein 39 OS=Mus musculus GN-Vps39 PE=1 SV=1                                     |
| P62137                 | 0.467029562 | 62  | 44  | 51  | 11  | 66  | 33  | 11  | 55 Serine/threonine-protein phosphatase PPI-alpha catalytic subunit OS=Mus musculus GN-Ppp1ca PE=1 SV=1                  |
| H3B97                  | 0.433814886 | 32  | 25  | 28  | 0   | 40  | 26  | 18  | 27 Tubulin-interacting nephritis antigen-like OS=Mus musculus GN-Tinagl1 PE=1 SV=1                                       |
| Q9Z0N1                 | 0.360311356 | 54  | 43  | 41  | 8   | 41  | 39  | 26  | 37 Eukaryotic translation initiation factor 2 subunit 3, X-linked OS=Mus musculus GN-Eif2k3 PE=1 SV=2                    |
| P68368                 | 0.284209651 | 212 | 142 | 144 | 33  | 168 | 139 | 71  | 142 Tubulin alpha-4 chain OS=Mus musculus GN-Tuba4a PE=1 SV=1                                                            |
| Q909T2                 | 0.224102373 | 16  | 10  | 8   | 0   | 8   | 10  | 10  | 11 Retinulin OS=Mus musculus GN-Rtn PE=1 SV=1                                                                            |
| Q9JHU4                 | 0.379211428 | 324 | 244 | 274 | 53  | 248 | 220 | 153 | 254 Cytoplasmic dynein 1 heavy chain 1 OS=Mus musculus GN-Dync1h1 PE=1 SV=2                                              |
| P17427                 | 0.196508308 | 10  | 6   | 11  | 3   | 7   | 6   | 0   | 9 AP-2 complex subunit alpha-2 OS=Mus musculus GN-Ap2a2 PE=1 SV=2                                                        |
| PG2702                 | 0.593826007 | 92  | 64  | 87  | 14  | 85  | 65  | 53  | 78 40S ribosomal protein L23, isoform OS=Mus musculus GN-Rpl23 PE=1 SV=2                                                 |
| Q6Z9V3                 | 0.882641469 | 14  | 8   | 10  | 0   | 10  | 12  | 6   | 9 40S ribosomal protein S27-like OS=Mus musculus GN-Rps27l PE=1 SV=1                                                     |
| P54923                 | 0.596199917 | 14  | 10  | 7   | 0   | 10  | 10  | 10  | 14 [Protein ADP-ribosylarginine] hydrolase OS=Mus musculus GN-Adprh PE=1 SV=1                                            |
| Q9DC14                 | 0.642521644 | 14  | 6   | 18  | 0   | 12  | 13  | 7   | 17 Eukaryotic translation initiation factor 3 subunit F OS=Mus musculus GN-Eif3f PE=1 SV=2                               |
| D3Z795                 | 0.016341053 | 13  | 6   | 7   | 3   | 6   | 0   | 0   | 8 Proteasome assembly chaperone 1 OS=Mus musculus GN-Pcap1 PE=1 SV=1                                                     |
| Q9JRK3                 | 0.016341053 | 13  | 6   | 7   | 3   | 6   | 0   | 0   | 8 Proteasome assembly chaperone 1 OS=Mus musculus GN-Pcap1 PE=1 SV=1                                                     |
| AA0A1B0GSA8            | 0.930215017 | 18  | 19  | 0   | 0   | 0   | 21  | 16  | 17 60S ribosomal protein L18 (Fragment) OS=Mus musculus GN-Rpl18 PE=1 SV=1                                               |
| D3YVB1                 | 0.332587356 | 13  | 20  | 15  | 7   | 18  | 9   | 12  | 14 Septin-2 (Fragment) OS=Mus musculus GN-Sept2 PE=1 SV=1                                                                |
| Q9CQ19                 | 0.356092388 | 5   | 3   | 6   | 0   | 4   | 0   | 5   | 0 Myosin regulatory light polypeptide 9 OS=Mus musculus GN-Myr9 PE=1 SV=3                                                |
| P70460                 | 0.695191964 | 3   | 0   | 0   | 0   | 0   | 0   | 3   | 3 Phorbol-12-myristate-13-acetate-induced protein 1 OS=Mus musculus GN-Vps PE=1 SV=4                                     |
| G3XV90                 | 0.017827204 | 0   | 0   | 6   | 0   | 5   | 6   | 6   | 6 MCC22048, isoform CRA_a OS=Mus musculus GN-Pame2 PE=1 SV=1                                                             |
| Q62167                 | 0.36984196  | 22  | 14  | 30  | 4   | 18  | 14  | 0   | 19 ATP-dependent RNA helicase DDX3X OS=Mus musculus GN-Ddx3x PE=1 SV=3                                                   |
| ZAAGN7                 | 0.545989187 | 23  | 20  | 24  | 3   | 23  | 16  | 8   | 19 26S protease regulatory subunit 6A OS=Mus musculus GN-Pam3 PE=1 SV=1                                                  |
| Q8HEZ3                 | 0.145751508 | 293 | 208 | 186 | 5   |     |     |     |                                                                                                                          |

|            |             |     |     |     |    |     |     |     |     |                                                                                                                       |
|------------|-------------|-----|-----|-----|----|-----|-----|-----|-----|-----------------------------------------------------------------------------------------------------------------------|
| Q922K7     | 0.06987512  | 22  | 19  | 17  | 4  | 18  | 15  | 9   | 14  | Probable 28S rRNA (cytosine-C5)-methyltransferase OS=Mus musculus GN=Nop2 PE=1 SV=1                                   |
| P61161     | 0.17785977  | 43  | 35  | 43  | 11 | 35  | 40  | 13  | 31  | Actin-related protein 2 OS=Mus musculus GN=Actr2 PE=1 SV=1                                                            |
| Q83663     | 0.82778231  | 5   | 3   | 0   | 2  | 0   | 2   | 0   | 1   | E3 ubiquitin-protein ligase Ishy OS=Mus musculus GN=Ishy PE=1 SV=2                                                    |
| FCY988     | 0.893453785 | 3   | 4   | 3   | 0  | 0   | 3   | 2   | 2   | Methylthiohistone-L-phosphate isomerase (Fragment) OS=Mus musculus GN=Mtrll PE=1 SV=1                                 |
| P97371     | 0.032810954 | 0   | 0   | 10  | 0  | 5   | 12  | 11  | 8   | Proteasome activator complex subunit 1 OS=Mus musculus GN=Panel PE=1 SV=2                                             |
| Q7TNP2     | 0.146299267 | 4   | 8   | 6   | 2  | 6   | 0   | 0   | 3   | Serine/threonine-protein phosphatase 2A 65 kDa regulatory subunit A beta isoform OS=Mus musculus GN=Ppp2r1b PE=1 SV=2 |
| AA089PYT08 | 0.361396015 | 0   | 0   | 5   | 0  | 0   | 5   | 4   | 0   | Ras GTPase-activating protein-binding protein 2 (Fragment) OS=Mus musculus GN=C3gbr2 PE=1 SV=1                        |
| Q8RBT0     | 0.363210692 | 6   | 15  | 5   | 0  | 0   | 0   | 0   | 2   | 11 Copin OS=Mus musculus GN=Cpn3 PE=1 SV=2                                                                            |
| BRK3K3     | 0.557812127 | 10  | 0   | 0   | 0  | 0   | 0   | 11  | 7   | Heterogeneous nuclear ribonucleoprotein M OS=Mus musculus GN=Hnrmpp PE=1 SV=1                                         |
| D3VT09     | 0.569574268 | 0   | 0   | 7   | 3  | 5   | 0   | 0   | 4   | 40S ribosomal protein S15 OS=Mus musculus GN=Rps15 PE=1 SV=1                                                          |
| P62343     | 0.569574268 | 0   | 0   | 7   | 3  | 5   | 0   | 0   | 4   | 40S ribosomal protein S15 OS=Mus musculus GN=Rps15 PE=1 SV=1                                                          |
| A2AF19     | 0.14518141  | 28  | 24  | 24  | 13 | 33  | 17  | 0   | 20  | Histone-binding protein RBBP7 OS=Mus musculus GN=Rbbp7 PE=1 SV=1                                                      |
| A2AF19     | 0.14518141  | 28  | 24  | 24  | 13 | 33  | 17  | 0   | 20  | Histone-binding protein RBBP7 OS=Mus musculus GN=Rbbp7 PE=1 SV=1                                                      |
| A2AF19     | 0.14518141  | 28  | 24  | 24  | 13 | 33  | 17  | 0   | 20  | Histone-binding protein RBBP7 OS=Mus musculus GN=Rbbp7 PE=1 SV=1                                                      |
| AA01BOGSG5 | 0.342161783 | 26  | 18  | 21  | 3  | 22  | 11  | 12  | 16  | Ribonuclease inhibitor OS=Mus musculus GN=Rnh1 PE=1 SV=1                                                              |
| Q91V17     | 0.342161783 | 26  | 18  | 21  | 3  | 22  | 11  | 12  | 16  | Ribonuclease inhibitor OS=Mus musculus GN=Rnh1 PE=1 SV=1                                                              |
| P23116     | 0.000334455 | 69  | 48  | 55  | 19 | 55  | 36  | 31  | 4   | Eukaryotic translation initiation factor 3 subunit A OS=Mus musculus GN=EIF3A PE=1 SV=5                               |
| Q70475     | 0.109873106 | 32  | 23  | 24  | 6  | 31  | 14  | 11  | 20  | UDP-glucose 6-dehydrogenase OS=Mus musculus GN=Ugdh PE=1 SV=1                                                         |
| G3UY38     | 0.10204498  | 15  | 14  | 14  | 5  | 13  | 14  | 0   | 5   | Heterogeneous nuclear ribonucleoprotein L OS=Mus musculus GN=Hnrlp1 PE=1 SV=1                                         |
| E90A15     | 0.094462382 | 40  | 26  | 40  | 11 | 26  | 31  | 21  | 26  | CAD protein OS=Mus musculus GN=Cad PE=1 SV=1                                                                          |
| R2P3G6     | 0.094462382 | 40  | 26  | 40  | 11 | 26  | 31  | 21  | 26  | CAD protein OS=Mus musculus GN=Cad PE=1 SV=1                                                                          |
| R48722     | 0.901585849 | 0   | 4   | 5   | 0  | 5   | 3   | 0   | 4   | Heat shock 70 kDa protein 4L OS=Mus musculus GN=Hspa4l PE=1 SV=2                                                      |
| H3BKS5     | 0.866523927 | 7   | 4   | 7   | 0  | 5   | 6   | 0   | 6   | rRNA (guanine(26)-N(2))-dimethyltransferase OS=Mus musculus GN=Tmtl1 PE=1 SV=1                                        |
| E9PWD4     | 0.866523927 | 7   | 4   | 7   | 0  | 5   | 6   | 0   | 6   | rRNA (guanine(26)-N(2))-dimethyltransferase OS=Mus musculus GN=Tmtl1 PE=1 SV=1                                        |
| AA089IZW7  | 0.866523927 | 7   | 4   | 7   | 0  | 5   | 6   | 0   | 6   | rRNA (guanine(26)-N(2))-dimethyltransferase OS=Mus musculus GN=Tmtl1 PE=1 SV=1                                        |
| Q3TX08     | 0.866523927 | 7   | 4   | 7   | 0  | 5   | 6   | 0   | 6   | rRNA (guanine(26)-N(2))-dimethyltransferase OS=Mus musculus GN=Tmtl1 PE=1 SV=1                                        |
| R48758     | 0.581043745 | 11  | 8   | 14  | 0  | 12  | 13  | 7   | 26  | Heat shock 70 kDa protein 4L OS=Mus musculus GN=Hspa4l PE=1 SV=2                                                      |
| Q3THW5     | 0.415392864 | 56  | 29  | 34  | 3  | 28  | 0   | 27  | 26  | Histone H2A v.2 OS=Mus musculus GN=H2afv PE=1 SV=3                                                                    |
| G52624     | 0.152529497 | 15  | 15  | 14  | 5  | 14  | 16  | 0   | 5   | Heterogeneous nuclear ribonucleoprotein L (Fragment) OS=Mus musculus GN=Hnrlp1 PE=1 SV=1                              |
| R08R01     | 0.152529497 | 15  | 15  | 18  | 5  | 14  | 16  | 0   | 5   | Heterogeneous nuclear ribonucleoprotein L OS=Mus musculus GN=Hnrlp1 PE=1 SV=2                                         |
| P58252     | 0.004311816 | 399 | 264 | 287 | 89 | 315 | 191 | 161 | 247 | Elongation factor 2 OS=Mus musculus GN=Ecf2 PE=1 SV=2                                                                 |
| AA062JZP29 | 0.20086314  | 22  | 14  | 17  | 4  | 21  | 7   | 6   | 6   | Procollagen C-endopeptidase enhancer 1 (Fragment) OS=Mus musculus GN=Pcolec PE=1 SV=1                                 |
| PK0256     | 0.668678513 | 56  | 29  | 34  | 3  | 28  | 0   | 27  | 26  | Histone H2A.Z OS=Mus musculus GN=H2afz PE=1 SV=3                                                                      |
| Q3UQ72     | 0.577418527 | 4   | 0   | 0   | 0  | 0   | 0   | 4   | 3   | Actin-related protein 2/3 complex subunit 5 OS=Mus musculus GN=Arpe5 PE=1 SV=1                                        |
| Q9CPW4     | 0.577418527 | 4   | 0   | 0   | 0  | 0   | 0   | 4   | 3   | Actin-related protein 2/3 complex subunit 5 OS=Mus musculus GN=Arpe5 PE=1 SV=3                                        |
| R08K09     | 0.171331292 | 11  | 14  | 19  | 3  | 11  | 14  | 8   | 8   | 8 GDP-mannose 4,6 dehydratase OS=Mus musculus GN=Gmd4 PE=1 SV=1                                                       |
| Q5SL80     | 0.014697201 | 18  | 15  | 18  | 2  | 15  | 15  | 0   | 15  | 6-GDP-mannose 4,6 dehydratase OS=Mus musculus GN=Gmd4 PE=1 SV=1                                                       |
| AA01BOGSE8 | 0.043916264 | 22  | 14  | 20  | 5  | 17  | 15  | 10  | 11  | 40S ribosomal protein S11 (Fragment) OS=Mus musculus GN=Rps11 PE=1 SV=1                                               |
| P47753     | 0.336117213 | 12  | 14  | 4   | 8  | 11  | 7   | 7   | 8   | F-actin-capping protein subunit alpha-1 OS=Mus musculus GN=Capza1 PE=1 SV=4                                           |
| Q5RKN9     | 0.336117213 | 12  | 14  | 4   | 8  | 11  | 7   | 7   | 8   | F-actin-capping protein subunit alpha-1 OS=Mus musculus GN=Capza1 PE=1 SV=1                                           |
| AA062JH04  | 0.059457398 | 17  | 9   | 18  | 9  | 0   | 10  | 0   | 13  | Eukaryotic translation initiation factor 4E OS=Mus musculus GN=EIF4 PE=1 SV=1                                         |
| Q8R8C5     | 0.60129471  | 23  | 2   | 21  | 16 | 11  | 16  | 0   | 24  | Beta-tubulin OS=Mus musculus GN=Tu PE=1 SV=1                                                                          |
| E9PVS8     | 0.868441856 | 6   | 6   | 3   | 0  | 4   | 0   | 4   | 5   | Transportin-2 OS=Mus musculus GN=Tapo2 PE=1 SV=1                                                                      |
| E9JMA2     | 0.708373477 | 8   | 6   | 6   | 0  | 5   | 7   | 0   | 7   | Queuine tRNA-ribosyltransferase catalytic subunit 1 OS=Mus musculus GN=Qtrt1 PE=1 SV=2                                |
| Q69973     | 0.113172037 | 29  | 27  | 26  | 13 | 24  | 17  | 10  | 21  | Histone-binding protein RBBP7 OS=Mus musculus GN=Rbbp7 PE=1 SV=1                                                      |
| Q52615     | 0.458580862 | 20  | 12  | 22  | 6  | 14  | 17  | 0   | 6   | Eukaryotic translation initiation factor 4E OS=Mus musculus GN=EIF4 PE=1 SV=2                                         |
| AA0140TRK6 | 0.520021707 | 7   | 5   | 8   | 0  | 5   | 7   | 6   | 5   | 60S ribosomal protein L36 OS=Mus musculus GN=Rpl36 PE=1 SV=1                                                          |
| G6WZ24     | 0.520021707 | 7   | 5   | 8   | 0  | 5   | 7   | 6   | 5   | 60S ribosomal protein L36 OS=Mus musculus GN=Rpl36 PE=1 SV=1                                                          |
| Q8C2E7     | 0.283999553 | 3   | 2   | 2   | 0  | 0   | 0   | 2   | 0   | WASH complex subunit strumpellin OS=Mus musculus GN=Kua0196 PE=1 SV=2                                                 |
| Q9DD04     | 0.316794996 | 2   | 2   | 2   | 0  | 0   | 0   | 2   | 0   | Protein dimethyladenosine transferase OS=Mus musculus GN=Dimt1 PE=2 SV=1                                              |
| Q00P19     | 0.321351902 | 2   | 3   | 2   | 0  | 0   | 0   | 0   | 2   | Heterogeneous nuclear ribonucleoprotein U-like protein 2 OS=Mus musculus GN=Hnrlp2 PE=1 SV=2                          |
| AA0AUIRNK6 | 0.043733859 | 13  | 10  | 9   | 3  | 13  | 7   | 3   | 7   | S-adenosylmethionine synthase OS=Mus musculus GN=Mat2a PE=1 SV=1                                                      |
| F8VPK0     | 0.305822475 | 7   | 4   | 10  | 0  | 5   | 7   | 0   | 2   | Protein Tc37 OS=Mus musculus GN=Tc37 PE=1 SV=1                                                                        |
| Q62619     | 0.467116922 | 14  | 10  | 14  | 0  | 14  | 16  | 0   | 8   | KH domain-containing RNA polymerase II signal transduction-associated protein 1 OS=Mus musculus GN=Khdrrb1 PE=1 SV=2  |
| P57716     | 0.570431153 | 4   | 0   | 3   | 0  | 0   | 0   | 3   | 0   | Nicotiana OS=Mus musculus GN=Ncn PE=1 SV=3                                                                            |
| P01898     | 0.452158509 | 5   | 5   | 4   | 0  | 4   | 0   | 0   | 4   | H-2 class I histocompatibility antigen, Q10 alpha chain OS=Mus musculus GN=H2-Q10 PE=1 SV=3                           |
| P17918     | 0.009483303 | 54  | 39  | 37  | 16 | 42  | 29  | 21  | 33  | Proliferating cell nuclear antigen OS=Mus musculus GN=Pcna PE=1 SV=1                                                  |
| Q8QZ11     | 0.468816474 | 69  | 19  | 19  | 7  | 24  | 26  | 21  | 44  | Eukaryotic translation initiation factor 3 subunit OS=Mus musculus GN=EIF3 PE=1 SV=1                                  |
| P26656     | 0.693617281 | 11  | 5   | 11  | 0  | 13  | 4   | 0   | 6   | Nucleosome assembly protein 1-like 1 OS=Mus musculus GN=Nap11 PE=1 SV=2                                               |
| E9PW66     | 0.693617281 | 11  | 5   | 11  | 0  | 13  | 4   | 0   | 6   | Nucleosome assembly protein 1-like 1 OS=Mus musculus GN=Nap11 PE=1 SV=1                                               |
| P70452     | 0.314032603 | 4   | 0   | 6   | 0  | 3   | 5   | 4   | 5   | Syntaxin-4 OS=Mus musculus GN=Stx4 PE=1 SV=1                                                                          |
| Q91Y28     | 0.095568042 | 11  | 0   | 0   | 0  | 0   | 0   | 6   | 7   | Polysialyltransferase OS=Mus musculus GN=Polysal4 PE=1 SV=1                                                           |
| Q6PH09     | 0.095868042 | 11  | 0   | 0   | 0  | 15  | 0   | 6   | 7   | Polysialyltransferase OS=Mus musculus GN=Polysal4 PE=1 SV=1                                                           |
| Q91V12     | 0.112263040 | 20  | 15  | 19  | 0  | 19  | 11  | 5   | 15  | Cytosolic acyl coenzyme A thioester transferase OS=Mus musculus GN=Acoot7 PE=1 SV=2                                   |
| P01899     | 0.862639909 | 8   | 7   | 8   | 0  | 9   | 6   | 3   | 8   | H-2 class I histocompatibility antigen, D-B alpha chain OS=Mus musculus GN=H2-D1 PE=1 SV=2                            |
| P29387     | 0.76273714  | 9   | 25  | 19  | 21 | 19  | 21  | 19  | 29  | Guanine nucleotide-binding protein subunit beta-4 OS=Mus musculus GN=Gnb4 PE=1 SV=4                                   |
| P14206     | 0.454186716 | 63  | 42  | 59  | 5  | 51  | 29  | 21  | 42  | 40S ribosomal protein SA OS=Mus musculus GN=Rpsa PE=1 SV=4                                                            |
| Q9Z0N2     | 0.398112856 | 41  | 33  | 33  | 3  | 29  | 25  | 15  | 24  | Eukaryotic translation initiation factor 2 subunit 3, Y-linked OS=Mus musculus GN=EIF2g3y PE=1 SV=2                   |
| AA0140LH7  | 0.416237111 | 47  | 26  | 31  | 5  | 24  | 27  | 11  | 30  | Protein arginine N-methyltransferase 1 OS=Mus musculus GN=Prmt1 PE=1 SV=1                                             |
| P97351     | 0.091348172 | 62  | 32  | 39  | 14 | 38  | 35  | 24  | 27  | 40S ribosomal protein S3a OS=Mus musculus GN=Rps3a PE=1 SV=3                                                          |
| PK5094     | 0.042889642 | 19  | 19  | 25  | 7  | 21  | 17  | 0   | 21  | Guanine nucleotide-binding protein subunit alpha OS=Mus musculus GN=Gab1 PE=1 SV=1                                    |
| Q9EPU4     | 0.375878781 | 9   | 12  | 14  | 2  | 11  | 6   | 0   | 10  | Cleavage and polyadenylation specificity factor subunit 1 OS=Mus musculus GN=Cpaf1 PE=1 SV=1                          |
| D3YVJ3     | 0.791748537 | 0   | 0   | 0   | 46 | 0   | 30  | 47  | 0   | 40S ribosomal protein S2 OS=Mus musculus GN=Rps2 PE=1 SV=1                                                            |
| PK3990     | 0.042199526 | 24  | 17  | 16  | 4  | 18  | 12  | 8   | 13  | Poly(C)-binding protein 2 OS=Mus musculus GN=Pcbp2 PE=1 SV=1                                                          |
| B7ZCF1     | 0.085315866 | 38  | 36  | 15  | 26 | 4   | 22  | 6   | 22  | Protein dimethyladenosine transferase OS=Mus musculus GN=Dimt1 PE=1 SV=1                                              |
| AA0140LF4  | 0.441890231 | 46  | 21  | 31  | 5  | 21  | 25  | 12  | 18  | Protein arginine N-methyltransferase 1 (Fragment) OS=Mus musculus GN=Prmt1 PE=1 SV=1                                  |
| E9Q8K5     | 0.241482363 | 0   | 8   | 4   | 6  | 5   | 0   | 2   | 0   | Titin OS=Mus musculus GN=Ttn PE=1 SV=1                                                                                |
| R08CD76    | 0.413569618 | 3   | 3   | 0   | 0  | 3   | 2   | 2   | 2   | Kinesin light chain 1 OS=Mus musculus GN=Klc1 PE=1 SV=1                                                               |
| Q5LE59     | 0.413569618 | 3   | 3   | 0   | 0  | 3   | 2   | 2   | 2   | Kinesin light chain 1 OS=Mus musculus GN=Klc1 PE=1 SV=1                                                               |
| E9Q7C9     | 0.413569618 | 3   | 3   | 0   | 0  | 3   | 2   | 2   | 2   | Kinesin light chain 1 OS=Mus musculus GN=Klc1 PE=1 SV=1                                                               |
| Q7TNE4     | 0.413569618 | 3   | 3   | 0   | 0  | 3   | 2   | 2   | 2   | Kinesin light chain 1 OS=Mus musculus GN=Klc1 PE=1 SV=1                                                               |
| Q9VCB6     | 0.420999411 | 13  | 10  | 11  | 2  | 3   | 11  | 6   | 0   | Actin-related protein 2/3 complex subunit 2 OS=Mus musculus GN=Arpe2 PE=1 SV=3                                        |
| Q9D1M0     | 0.467060554 | 6   | 0   | 6   | 0  | 0   | 0   | 0   | 0   | Protein G-kinase OS=Mus musculus GN=Gck13 PE=1 SV=3                                                                   |
| P97370     | 0.646850134 | 4   | 7   | 7   | 0  | 6   | 5   | 0   | 4   | Sodium/potassium-transporting ATPase subunit beta-3 OS=Mus musculus GN=Atpb13 PE=1 SV=1                               |
| Q8V175     | 0.767354152 | 8   | 6   | 4   | 0  | 8   | 3   | 5   | 4   | Inositol-4-O-methyltransferase OS=Mus musculus GN=Ipo4 PE=1 SV=1                                                      |
| Q9D1P4     | 0.881492308 | 0   | 3   | 0   | 0  | 3   | 0   | 0   | 2   | Cysteine and histidine-rich domain-containing protein 1 OS=Mus musculus GN=Chordc1 PE=1 SV=1                          |
| Q9EQ09     | 0.183131818 | 3   | 3   | 0   | 0  | 3   | 0   | 0   | 2   | Protein G-kinase OS=Mus musculus GN=Gck13 PE=1 SV=2                                                                   |
| Q9D109     | 0.056114253 | 50  | 39  | 37  | 10 | 33  | 27  | 19  | 34  | Arginine-tRNA ligase, cytoplasmic OS=Mus musculus GN=Ranr PE=1 SV=2                                                   |
| P17182     | 0.02134838  | 172 | 144 | 148 | 38 | 127 | 103 | 72  | 115 | Alpha-amylase OS=Mus musculus GN=Eno1 PE=1 SV=3                                                                       |
| Q9R0E2     | 0.75272492  | 8   | 9   | 11  | 0  | 13  | 7   | 0   | 4   | Procollagen-lysine-2-oxoglutarate 5-dioxygenase 1 OS=Mus musculus GN=Plocl1 PE=1 SV=1                                 |
| Q60996     | 0.842680019 | 24  | 17  | 16  | 7  | 19  | 10  | 10  | 7   | Serine/threonine-protein phosphatase 2A 65 kDa regulatory subunit gamma isoform OS=Mus musculus GN=Ppp2r2c PE=1 SV=2  |
| P63073     | 0.086762929 | 17  | 9   | 18  | 9  | 9   | 10  | 0   | 14  | Cytosolic acyl coenzyme A thioester transferase OS=Mus musculus GN=Acoot7 PE=1 SV=1                                   |
| P62192     | 0.063620078 | 38  | 28  | 26  | 7  | 22  | 18  | 13  | 24  | 26S proteasome regulatory subunit 4 OS=Mus musculus GN=Psme4 PE=1 SV=1                                                |
| Q8R8M2     | 0.007944488 | 88  | 67  | 73  | 23 | 67  | 51  | 33  | 61  | Leucine-tRNA ligase, cytoplasmic OS=Mus musculus GN=Lars3 PE=1 SV=2                                                   |
| E9PXP22    | 0.777326031 | 4   | 3   | 3   | 0  | 3   | 3   | 2   | 2   | Oxysterol-binding protein OS=Mus musculus GN=Osbp1 PE=1 SV=2                                                          |
| A2A8Z1     | 0.777326031 | 4   | 3   | 3   | 0  | 3   | 3   | 2   | 2   | Oxysterol-binding protein OS=Mus musculus GN=Osbp1 PE=1 SV=1                                                          |
| F6JHR6     | 0.777326031 | 4   | 3   | 3   | 0  | 3   | 3   | 2   | 2   | Oxysterol-binding protein OS=Mus musculus GN=Osbp1 PE=1 SV=2                                                          |
| AA0A6YXH3  | 0.777326031 | 4   | 3   | 3   | 0  | 3   | 3   | 2   | 2   | Oxysterol-binding protein OS=Mus musculus GN=Osbp1 PE=1 SV=1                                                          |
| Q9Z1Z      | 0.645836903 | 10  | 10  | 7   | 5  | 7   | 7   | 14  | 7   | Large neutral amino acid transporter small subunit 1 OS=Mus musculus GN=Slc7a5 PE=1 SV=2                              |
| P10605     | 0.230204159 | 19  | 14  | 20  | 2  | 15  | 10  | 0   | 0   | Cathepsin B OS=Mus musculus GN=Csb PE=1 SV=2                                                                          |
| Q55226     | 0.831786656 | 6   | 5   | 6   | 0  | 5   | 4   | 0   | 5   | 26S proteasome non-ATPase regulatory subunit 4 OS=Mus musculus GN=Psmd4 PE=1 SV=1                                     |
| G64522     | 0.123454968 | 68  | 53  | 62  | 23 | 52  | 25  | 51  | 61  | Histone H2A type 2-B OS=Mus musculus GN=H2ab2ab PE=1 SV=3                                                             |
| PK5242     | 0.102859594 | 63  | 41  | 52  | 9  | 36  | 38  | 21  | 19  | Eukaryotic translation initiation factor 5A 1 OS=Mus musculus GN=EIF5a PE=1 SV=2                                      |
| Q9JF0      | 0.49415339  | 73  | 41  | 52  | 5  | 36  | 38  | 21  | 45  | Protein arginine N-methyltransferase 1 OS=Mus musculus GN=Prmt1 PE=1 SV=1                                             |
| AA0171KXD3 | 0.49415339  | 73  | 41  | 52  | 5  | 36  | 38  | 21  | 45  | Protein arginine N-methyltransferase 1 OS=Mus musculus GN=Prmt1 PE=1 SV=1                                             |
| Q9ES97     | 0.256490442 | 11  | 4   | 7   | 0  | 0   | 6   | 0   | 0   | Reticulon-3 OS=Mus musculus GN=Rtn3 PE=1 SV=2                                                                         |
| E9Q242     | 0.582097945 | 6   | 11  | 7   | 0  | 9   | 5   | 0   | 4   | Adenylsuccinate lyase OS=Mus musculus GN=Adl PE=1 SV=1                                                                |
| E9PUD2     | 0.273133897 | 14  | 12  | 16  | 2  | 13  | 11  | 4   | 8   | Dynamin-1-like protein OS=Mus musculus GN=Dnm1 PE=1 SV=1                                                              |
| P16381     | 0.380752838 | 23  | 13  | 27  | 3  | 14  | 13  | 10  | 17  | Putative ATP-dependent RNA helicase P110 OS=Mus musculus GN=D1Pas1 PE=1 SV=1                                          |
| P17439     | 0.259257581 | 2   | 7   | 2   | 3  | 0   | 0   | 0   | 0   | Gly                                                                                                                   |

|                               |             |     |     |     |    |     |     |    |     |                                                                                                                         |
|-------------------------------|-------------|-----|-----|-----|----|-----|-----|----|-----|-------------------------------------------------------------------------------------------------------------------------|
| Q9D7G0                        | 0.070775374 | 15  | 14  | 14  | 10 | 11  | 9   | 6  | 15  | Ribose-phosphate pyrophosphokinase 1 OS-Mus musculus GN=Pppl PE=1 SV=4                                                  |
| A0A0A0MQM0                    | 0.114770901 | 28  | 23  | 28  | 9  | 34  | 13  | 7  | 14  | Eukaryotic translation initiation factor 5A (Fragment) OS-Mus musculus GN=Eif5a PE=1 SV=1                               |
| P97384                        | 0.140381609 | 24  | 15  | 23  | 4  | 14  | 12  | 7  | 11  | Amyloid A11 OS-Mus musculus GN=Aaa11 PE=1 SV=2                                                                          |
| P62369                        | 0.558464339 | 5   | 6   | 0   | 0  | 5   | 3   | 0  | 6   | Transcription elongation factor B polypeptide 2 OS-Mus musculus GN=Teceb2 PE=1 SV=1                                     |
| P61164                        | 0.207952856 | 46  | 25  | 25  | 5  | 27  | 16  | 10 | 12  | Alpha-centractin OS-Mus musculus GN=Actr1a PE=1 SV=1                                                                    |
| Q62095                        | 0.355119395 | 21  | 11  | 23  | 2  | 11  | 10  | 10 | 13  | ATP-dependent RNA helicase DDX3Y OS-Mus musculus GN=Ddx3y PE=1 SV=2                                                     |
| P95054                        | 0.890268805 | 17  | 10  | 8   | 0  | 9   | 4   | 10 | 13  | Dynamain-2 OS-Mus musculus GN=Dnm2 PE=1 SV=2                                                                            |
| A0A0A0WZRZ5                   | 0.153523291 | 10  | 7   | 0   | 0  | 0   | 0   | 0  | 0   | TAR DNA-binding protein 43 OS-Mus musculus GN=Tardbp PE=1 SV=1                                                          |
| HBK8N0                        | 0.22682888  | 14  | 5   | 12  | 2  | 6   | 7   | 0  | 6   | 6 rRNA (cytosine(34)-C(5))-methyltransferase OS-Mus musculus GN=Nsun2 PE=1 SV=1                                         |
| H1HFZ0                        | 0.22682888  | 14  | 5   | 12  | 2  | 6   | 7   | 0  | 6   | 6 rRNA (cytosine(34)-C(5))-methyltransferase OS-Mus musculus GN=Nsun2 PE=1 SV=2                                         |
| P63330                        | 0.935498292 | 37  | 30  | 36  | 0  | 42  | 22  | 10 | 31  | Serine-threonine-protein phosphatase 2A catalytic subunit alpha isoform OS-Mus musculus GN=Ppp2ca PE=1 SV=1             |
| A0A0A0M4SVB8                  | 0.885078277 | 0   | 4   | 4   | 0  | 0   | 2   | 0  | 4   | ADP-ribosylation factor 1B OS-Mus musculus GN=Arfbp1 PE=1 SV=1                                                          |
| Q9EQH3                        | 0.000640955 | 50  | 45  | 46  | 15 | 31  | 30  | 23 | 35  | Vacuolar protein sorting-associated protein 35 OS-Mus musculus GN=Vps35 PE=1 SV=1                                       |
| E9PZ54                        | 0.01823288  | 8   | 5   | 5   | 3  | 4   | 0   | 0  | 0   | 0 NH2P-like protein 1 OS-Mus musculus GN=Nhp21 PE=1 SV=1                                                                |
| Q9DBZ5                        | 0.031550301 | 7   | 7   | 4   | 3  | 5   | 0   | 0  | 3   | Eukaryotic translation initiation factor 3 subunit K OS-Mus musculus GN=Eif3k PE=1 SV=1                                 |
| P60122                        | 0.03888582  | 50  | 33  | 31  | 4  | 33  | 7   | 0  | 27  | Rav1 like 1 OS-Mus musculus GN=Rav1l1 PE=1 SV=1                                                                         |
| Q9CZU6                        | 0.013791653 | 31  | 23  | 21  | 8  | 16  | 15  | 10 | 12  | Citrate synthase, mitochondrial OS-Mus musculus GN=Csb PE=1 SV=1                                                        |
| Q9DB05                        | 0.134643179 | 13  | 5   | 7   | 4  | 5   | 6   | 4  | 7   | Alpha-soluble NSF attachment protein OS-Mus musculus GN=Napa PE=1 SV=1                                                  |
| A2AF09                        | 0.200119101 | 5   | 11  | 7   | 6  | 6   | 4   | 5  | 7   | E3 ubiquitin-protein ligase HUWE1 OS-Mus musculus GN=Huwe1 PE=1 SV=1                                                    |
| Q7TMY8                        | 0.200119101 | 5   | 11  | 7   | 6  | 6   | 4   | 5  | 7   | E3 ubiquitin-protein ligase HUWE1 OS-Mus musculus GN=Huwe1 PE=1 SV=5                                                    |
| A0A0G2FB4                     | 0.084637619 | 17  | 9   | 18  | 9  | 8   | 10  | 0  | 12  | Eukaryotic translation initiation factor 4E OS-Mus musculus GN=Eif4e PE=1 SV=1                                          |
| Q9DW85                        | 0.143275264 | 28  | 18  | 23  | 4  | 15  | 11  | 12 | 12  | 26S proteasome non-ATPase regulatory subunit 12 OS-Mus musculus GN=Pamd12 PE=1 SV=4                                     |
| Q9DAM6                        | 0.000722709 | 32  | 29  | 28  | 8  | 23  | 21  | 14 | 15  | U4/L4 small nuclear ribonucleoprotein Pp4 OS-Mus musculus GN=Ppp4 PE=1 SV=1                                             |
| Q8KX60                        | 0.099766623 | 8   | 2   | 4   | 6  | 0   | 0   | 0  | 0   | Cere haemato-HE2.2 OS-Mus musculus GN=He22y2 PE=1 SV=3                                                                  |
| Q9ROT7                        | 0.277159512 | 7   | 5   | 4   | 0  | 0   | 0   | 0  | 0   | 4 MCG15085 OS-Mus musculus GN=Try4 PE=1 SV=1                                                                            |
| Q9OQU9                        | 0.277159512 | 7   | 5   | 4   | 0  | 0   | 0   | 0  | 0   | 4 MCG15083 OS-Mus musculus GN=Try5 PE=1 SV=1                                                                            |
| Q8CIG8                        | 0.003700727 | 16  | 15  | 12  | 5  | 8   | 11  | 4  | 7   | Protein arginine N-methyltransferase 5 OS-Mus musculus GN=Pmrt5 PE=1 SV=3                                               |
| Q3T5B6                        | 0.066257647 | 13  | 10  | 12  | 4  | 3   | 7   | 3  | 7   | 5-S-adenosyl methionine synthetase 2 OS-Mus musculus GN=Mat2a PE=1 SV=2                                                 |
| Q9Z1F4                        | 0.081456772 | 8   | 5   | 4   | 3  | 2   | 3   | 3  | 7   | Heterogeneous nuclear ribonucleoprotein L-like OS-Mus musculus GN=Hnmpfl PE=1 SV=3                                      |
| Q8C483                        | 0.106711467 | 53  | 37  | 41  | 9  | 27  | 22  | 22 | 34  | Putative uncharacterized protein OS-Mus musculus GN=Sars PE=1 SV=1                                                      |
| P26638                        | 0.106711467 | 53  | 37  | 41  | 9  | 27  | 22  | 22 | 34  | Serine-rRNA ligase, cytoplasmic OS-Mus musculus GN=Sars PE=1 SV=3                                                       |
| B1A136                        | 0.143218118 | 12  | 7   | 11  | 2  | 14  | 11  | 11 | 12  | 26S proteasome non-ATPase regulatory subunit 12 OS-Mus musculus GN=Pamd12 PE=1 SV=1                                     |
| Q9P145                        | 0.209538616 | 15  | 8   | 11  | 2  | 7   | 7   | 4  | 7   | Eukaryotic translation initiation factor 2 subunit 2 OS-Mus musculus GN=Eif2k2 PE=1 SV=1                                |
| Q88543                        | 0.243754937 | 5   | 2   | 5   | 0  | 0   | 3   | 0  | 0   | 0 COP9 signalosome complex subunit 3 OS-Mus musculus GN=Cops3 PE=1 SV=3                                                 |
| Q9N9K10                       | 0.345793581 | 4   | 4   | 4   | 0  | 0   | 4   | 0  | 0   | 2 Acetate hydratase, mitochondrial OS-Mus musculus GN=Acoa2 PE=1 SV=1                                                   |
| Q8K423                        | 0.351719862 | 0   | 0   | 0   | 0  | 0   | 4   | 2  | 0   | 0 NADPH-dependent epimerase OS-Mus musculus GN=Nace PE=1 SV=1                                                           |
| P97470                        | 0.57210396  | 6   | 10  | 8   | 0  | 5   | 6   | 0  | 0   | 7 Serine-threonine-protein phosphatase 4 catalytic subunit OS-Mus musculus GN=Ppp4c PE=1 SV=2                           |
| Q9CQT1                        | 0.698170742 | 5   | 4   | 3   | 0  | 0   | 5   | 2  | 2   | 2 Methylthiohistone-1-phosphate isomerase OS-Mus musculus GN=Mri1 PE=1 SV=1                                             |
| Q9Z2X2                        | 0.732931517 | 0   | 4   | 0   | 0  | 3   | 0   | 0  | 0   | 0 26S proteasome non-ATPase regulatory subunit 10 OS-Mus musculus GN=Pamd10 PE=1 SV=3                                   |
| E0CX62                        | 0.787223017 | 0   | 4   | 0   | 0  | 0   | 0   | 0  | 0   | 3 Proteasome endopeptidase complex, OS-Mus musculus GN=Pan2a PE=1 SV=1                                                  |
| Q909D0                        | 0.873623098 | 5   | 11  | 0   | 0  | 8   | 6   | 2  | 8   | 8 Heterogeneous nuclear ribonucleoprotein A/B OS-Mus musculus GN=Hnrap PE=1 SV=1                                        |
| Q8QXR6                        | 0.873623098 | 5   | 11  | 0   | 0  | 8   | 6   | 2  | 8   | 8 Heterogeneous nuclear ribonucleoprotein A/B OS-Mus musculus GN=Hnrapb PE=1 SV=1                                       |
| Q20BD0                        | 0.873623098 | 5   | 11  | 8   | 0  | 8   | 6   | 2  | 8   | 8 Heterogeneous nuclear ribonucleoprotein A/B OS-Mus musculus GN=Hnrap PE=1 SV=1                                        |
| Q3TG45                        | 0.897839444 | 4   | 4   | 0   | 0  | 0   | 0   | 0  | 3   | 3 26S proteasome non-ATPase regulatory subunit 8 OS-Mus musculus GN=Pamd8 PE=1 SV=1                                     |
| Q3L114                        | 0.942348794 | 10  | 6   | 11  | 0  | 0   | 0   | 0  | 8   | 8 DNA damage-binding protein 1 OS-Mus musculus GN=DDX1 PE=1 SV=2                                                        |
| Q64487                        | 0.966724591 | 6   | 2   | 0   | 0  | 0   | 3   | 3  | 0   | 0 Receptor-type tyrosine-protein phosphatase delta OS-Mus musculus GN=Ptpd PE=1 SV=3                                    |
| F8WV15                        | 0.947821167 | 17  | 10  | 8   | 0  | 8   | 6   | 9  | 5   | 13 Dynamain-2 OS-Mus musculus GN=Dnm2 PE=1 SV=2                                                                         |
| P21995                        | 0.948212557 | 10  | 6   | 10  | 0  | 9   | 4   | 5  | 7   | 7 Embigin OS-Mus musculus GN=Embg PE=1 SV=2                                                                             |
| Q9Y1H6                        | 0.998157076 | 8   | 2   | 8   | 0  | 0   | 0   | 0  | 0   | 7 ATP1B1 H+ transporting, lysosomal V1 subunit beta1 OS-Mus musculus GN=Atg6p1b1 PE=1 SV=1                              |
| E9O1H7                        | 0.852526194 | 10  | 8   | 2   | 0  | 0   | 3   | 6  | 0   | 6 rRNA (guanine-N(7))-methyltransferase non-catalytic subunit WD84 OS-Mus musculus GN=Wd84 PE=1 SV=1                    |
| P07607                        | 0.196389933 | 2   | 2   | 4   | 0  | 2   | 0   | 0  | 0   | 0 Thymidylate synthase OS-Mus musculus GN=Tyms PE=1 SV=1                                                                |
| Q8BU12                        | 0.38272986  | 3   | 3   | 2   | 0  | 2   | 0   | 0  | 0   | 0 Tetranspinn-9 OS-Mus musculus GN=Tspan9 PE=1 SV=1                                                                     |
| A0A09Y7S4                     | 0.38272986  | 3   | 3   | 2   | 0  | 2   | 0   | 0  | 0   | 0 Tetranspinn (Fragment) OS-Mus musculus GN=Tspan9 PE=1 SV=1                                                            |
| Q9CWX4                        | 0.034279527 | 39  | 30  | 43  | 17 | 30  | 23  | 16 | 27  | 60S ribosomal protein L11 OS-Mus musculus GN=Rpl11 PE=1 SV=4                                                            |
| E9PY19                        | 0.034279527 | 39  | 30  | 43  | 17 | 30  | 23  | 16 | 27  | 27 Protein Gm10036 OS-Mus musculus GN=Gm10036 PE=3 SV=1                                                                 |
| Q9DA99                        | 0.35354998  | 0   | 34  | 0   | 0  | 0   | 27  | 0  | 10  | 6 Nucleobiosome OS-Mus musculus GN=Nubi PE=1 SV=1                                                                       |
| P49718                        | 0.114490901 | 25  | 26  | 17  | 6  | 14  | 14  | 14 | 13  | 13 DNA replication licensing factor MCM5 OS-Mus musculus GN=Mcm5 PE=1 SV=1                                              |
| Q3TCR7                        | 0.62264294  | 17  | 10  | 8   | 0  | 9   | 4   | 4  | 0   | 13 Dynamain-2 OS-Mus musculus GN=Dnm2 PE=1 SV=1                                                                         |
| Q3TRX3                        | 0.62264294  | 17  | 10  | 8   | 0  | 9   | 4   | 0  | 0   | 13 Dynamain-2 OS-Mus musculus GN=Dnm2 PE=1 SV=1                                                                         |
| G3GX64                        | 0.62264294  | 17  | 10  | 8   | 0  | 9   | 4   | 0  | 0   | 13 Dynamain-2 OS-Mus musculus GN=Dnm2 PE=1 SV=1                                                                         |
| Q02257                        | 0.078619012 | 9   | 7   | 12  | 3  | 7   | 5   | 3  | 8   | 8 Junction plakoglobin OS-Mus musculus GN=Jup PE=1 SV=3                                                                 |
| P70288                        | 0.341645221 | 17  | 12  | 19  | 0  | 10  | 8   | 5  | 7   | 14 Histone deacetylase 2 OS-Mus musculus GN=Hdac2 PE=1 SV=1                                                             |
| Q5EG47                        | 0.169545619 | 14  | 14  | 6   | 16 | 6   | 6   | 7  | 5   | 5 5'-AMP-activated protein kinase catalytic subunit alpha1 OS-Mus musculus GN=Pkaal1 PE=1 SV=2                          |
| Q8B0Y1                        | 0.59541783  | 11  | 4   | 0   | 0  | 0   | 0   | 0  | 0   | 3 26S proteasome non-ATPase regulatory subunit 5 OS-Mus musculus GN=Pamd5 PE=1 SV=1                                     |
| P17809                        | 0.89259605  | 12  | 7   | 0   | 0  | 6   | 9   | 0  | 0   | 0 Solute carrier family 2, facilitated glucose transporter member 1 OS-Mus musculus GN=Slc2a1 PE=1 SV=4                 |
| P42932                        | 0.001294    | 192 | 152 | 151 | 45 | 114 | 107 | 74 | 102 | T-complex protein 1 subunit theta OS-Mus musculus GN=Cct8 PE=1 SV=3                                                     |
| Q52K63                        | 0.114179577 | 26  | 29  | 6   | 15 | 15  | 14  | 14 | 14  | 14 DNA helicase OS-Mus musculus GN=Mcm5 PE=1 SV=1                                                                       |
| Q8E349                        | 0.669501794 | 5   | 4   | 16  | 0  | 4   | 4   | 4  | 4   | 3 Cell division cycle protein 16 homolog OS-Mus musculus GN=Cdc16 PE=1 SV=1                                             |
| Q8WHR6                        | 0.185087462 | 16  | 12  | 15  | 0  | 4   | 7   | 0  | 0   | 10 Protein H2A OS-Mus musculus GN=H2a PE=1 SV=1                                                                         |
| Q61151                        | 0.027080591 | 12  | 7   | 8   | 4  | 8   | 0   | 4  | 0   | 5 Serine-threonine-protein phosphatase 2A S6 K4 regulatory subunit epsilon isoform OS-Mus musculus GN=Ppp2r5e PE=1 SV=3 |
| A2ALV7                        | 0.947813206 | 18  | 8   | 12  | 0  | 12  | 5   | 5  | 4   | 15 Protein A1314180 (Fragment) OS-Mus musculus GN=A1314180 PE=1 SV=1                                                    |
| Q61398                        | 0.052621694 | 90  | 47  | 44  | 19 | 43  | 34  | 28 | 41  | 41 Procollagen C-endopeptidase enhancer 1 OS-Mus musculus GN=Pcolec PE=1 SV=2                                           |
| G3XAL0                        | 0.017881492 | 45  | 36  | 32  | 14 | 37  | 23  | 19 | 28  | Heterogeneous nuclear ribonucleoprotein U OS-Mus musculus GN=Hnrupa PE=1 SV=1                                           |
| Q8VEK3                        | 0.017881492 | 45  | 36  | 52  | 14 | 37  | 23  | 19 | 28  | Heterogeneous nuclear ribonucleoprotein U OS-Mus musculus GN=Hnrapa PE=1 SV=1                                           |
| Q9CQW2                        | 0.707414558 | 4   | 4   | 3   | 0  | 0   | 2   | 2  | 2   | 4 ADP-ribosylation factor-like protein 8B OS-Mus musculus GN=Arfbp1 PE=1 SV=1                                           |
| A0ADPPY56                     | 0.72314348  | 4   | 5   | 2   | 0  | 0   | 2   | 2  | 2   | 4 BRCA1-A complex subunit BRE (Fragment) OS-Mus musculus GN=Brc1 PE=1 SV=1                                              |
| Q3TPN3                        | 0.72314348  | 4   | 5   | 2   | 0  | 0   | 2   | 2  | 2   | 4 Cullin-1 (Fragment) OS-Mus musculus GN=Cul1 PE=1 SV=1                                                                 |
| Q9W1X6                        | 0.72314348  | 4   | 5   | 2   | 0  | 0   | 2   | 2  | 2   | 4 Cullin-1 OS-Mus musculus GN=Cul1 PE=1 SV=1                                                                            |
| Q91VH2                        | 0.74160568  | 2   | 2   | 9   | 0  | 6   | 3   | 2  | 2   | 5 Sorting nexin-9 OS-Mus musculus GN=Sxn9 PE=1 SV=1                                                                     |
| P83940                        | 0.97713204  | 13  | 9   | 9   | 0  | 8   | 10  | 6  | 6   | 6 Transcription elongation factor B polypeptide 1 OS-Mus musculus GN=Teceb1 PE=1 SV=1                                   |
| A0A087WNT1                    | 0.97713204  | 13  | 9   | 9   | 0  | 8   | 10  | 6  | 6   | 6 Transcription elongation factor B polypeptide 1 OS-Mus musculus GN=Teceb1 PE=1 SV=1                                   |
| A0A087W0E6                    | 0.97713204  | 13  | 9   | 9   | 0  | 8   | 10  | 6  | 6   | 6 Transcription elongation factor B polypeptide 1 OS-Mus musculus GN=Teceb1 PE=1 SV=1                                   |
| Q9D0T1                        | 0.002438475 | 15  | 9   | 13  | 3  | 10  | 7   | 6  | 6   | 6 6 NP2-like protein 1 OS-Mus musculus GN=Snu13 PE=1 SV=4                                                               |
| Q8VHK9                        | 0.136230469 | 5   | 7   | 14  | 3  | 7   | 3   | 5  | 5   | 6 ATP-dependent RNA helicase DHX36 OS-Mus musculus GN=Dhx36 PE=1 SV=2                                                   |
| Q919B4                        | 0.252974891 | 0   | 0   | 0   | 0  | 0   | 0   | 0  | 0   | 7 T-complex protein 2 OS-Mus musculus GN=Pcp2 PE=1 SV=1                                                                 |
| G3UZZ3                        | 0.592977537 | 14  | 8   | 7   | 0  | 7   | 4   | 0  | 0   | 10 Dynamain-2 (Fragment) OS-Mus musculus GN=Dnm2 PE=1 SV=1                                                              |
| Q8B7T1                        | 0.940822932 | 10  | 8   | 11  | 0  | 8   | 6   | 6  | 6   | 8 Nuclear pore complex protein Nup93 OS-Mus musculus GN=Nup93 PE=1 SV=1                                                 |
| A0A1D8RLQ0                    | 0.940822932 | 10  | 8   | 11  | 0  | 8   | 6   | 6  | 6   | 8 Nuclear pore complex protein Nup93 OS-Mus musculus GN=Nup93 PE=1 SV=1                                                 |
| P0K201                        | 0.945595905 | 109 | 88  | 110 | 29 | 44  | 37  | 41 | 29  | 167 Protein A10-A OS-Mus musculus GN=A10a10 PE=1 SV=2                                                                   |
| F60Z63                        | 0.983855042 | 28  | 25  | 22  | 0  | 15  | 6   | 25 | 26  | 26S proteasome regulatory subunit 6A (Fragment) OS-Mus musculus GN=Pan6c PE=1 SV=1                                      |
| Q8BTZ7                        | 0.884902023 | 5   | 8   | 11  | 0  | 6   | 5   | 4  | 4   | 8 Mannose-1-phosphate guanylyltransferase beta OS-Mus musculus GN=Gmpfb PE=1 SV=1                                       |
| P28658                        | 0.946843524 | 20  | 10  | 15  | 0  | 13  | 12  | 8  | 10  | 10 Auxin-10 OS-Mus musculus GN=Atn10 PE=1 SV=2                                                                          |
| Q9DBB4                        | 0.826007903 | 8   | 7   | 8   | 5  | 8   | 5   | 3  | 5   | 5 N-alpha-acetyltransferase 16, Nata auxiliary subunit OS-Mus musculus GN=Naa16 PE=2 SV=1                               |
| P21550                        | 0.207002607 | 27  | 25  | 26  | 24 | 31  | 17  | 7  | 18  | Beta-enolase OS-Mus musculus GN=Eno3 PE=1 SV=3                                                                          |
| G5E839                        | 0.012840613 | 98  | 75  | 93  | 22 | 71  | 47  | 34 | 54  | T-complex protein 1 subunit delta OS-Mus musculus GN=Cct4 PE=1 SV=1                                                     |
| P62960                        | 0.03031055  | 40  | 29  | 27  | 9  | 21  | 15  | 16 | 23  | Nucleic-acid-sensitive element-binding protein 1 OS-Mus musculus GN=Ydx1 PE=1 SV=3                                      |
| Reverse_trE9Q8NI[E9Q8NI_MOUSE | 0.652126243 | 0   | 5   | 2   | 0  | 0   | 2   | 0  | 0   | 3 Tinn OS-Mus musculus GN=Tnn PE=1 SV=1                                                                                 |
| P55282                        | 0.644119534 | 4   | 4   | 18  | 0  | 4   | 4   | 3  | 0   | 0 Ras-related protein Rab21 OS-Mus musculus GN=Rab21 PE=1 SV=4                                                          |
| Q6PD15                        | 0.910617154 | 108 | 83  | 101 | 25 | 80  | 50  | 37 | 59  | 15 Proteasome-associated protein ECM29 homolog OS-Mus musculus GN=Ec29 PE=1 SV=3                                        |
| P80315                        | 0.010444303 | 105 | 83  | 101 | 25 | 80  | 50  | 37 | 59  | 56 T-complex protein 1 subunit delta OS-Mus musculus GN=Cct4 PE=1 SV=3                                                  |
| P80317                        | 0.012996573 | 120 | 100 | 107 | 23 | 79  | 59  | 51 | 59  | 51 T-complex protein 1 subunit zeta OS-Mus musculus GN=Cct6a PE=1 SV=3                                                  |
| Q9UW32                        | 0.053215098 | 42  | 33  | 38  | 7  | 34  | 19  | 14 | 20  | 20 Actin-related protein 2/3 complex subunit 1B OS-Mus musculus GN=Arpc1b PE=1 SV=4                                     |
| Q91Z25                        | 0.05840991  | 42  | 33  | 38  | 7  | 35  | 18  | 12 | 20  | 20 Actin-related protein 2/3 complex subunit 1B OS-Mus musculus GN=Arpc1b PE=1 SV=1                                     |
| D3Z6E4                        | 0.182634166 | 23  | 0   | 11  | 0  | 12  | 0   | 0  | 0   | 0 Gamma-enolase OS-Mus musculus GN=Eno2 PE=1 SV=1                                                                       |
| Q9P1J9                        | 0.060894295 | 59  | 41  | 41  | 9  | 31  | 24  | 20 | 30  | 30 Actin-related protein 3 OS-Mus musculus GN=Actr3 PE=1 SV=3                                                           |
| H3BLB7                        | 0.086721386 | 13  | 8   | 8   | 0  | 4   | 0   | 4  | 0   | 3 Serine-threonine-protein phosphatase 2A S6 K4 regulatory subunit A beta isoform OS-Mus musculus GN=Ppp2r1b PE=1 SV=1  |
| P61358                        | 0.01790292  | 23  | 13  | 16  | 4  | 18  | 6   | 5  | 0   | 60S ribosomal protein L27 OS-Mus musculus GN=Rpl27 PE=1 SV=2                                                            |
| F6XPN0                        | 0.152871366 | 5   | 9   | 4   | 5  | 4   | 0   | 3  | 0   | 5 E3 ubiquitin-protein ligase HUWE1 (Fragment) OS-Mus musculus GN=Huwe1 PE=1 SV=1                                       |
| Q6PGB6                        | 0.25203238  | 0   | 4   | 6   | 3  | 2   | 4   | 0  | 0   | 0 N-alpha-acetyltransferase 50 OS-Mus musculus GN=Naa50 PE=1 SV=1                                                       |
| Q92112                        | 0.389668572 | 0   | 0   | 0   | 0  |     |     |    |     |                                                                                                                         |

|             |             |     |     |     |    |     |     |     |                                                                                                                                       |                                                                |
|-------------|-------------|-----|-----|-----|----|-----|-----|-----|---------------------------------------------------------------------------------------------------------------------------------------|----------------------------------------------------------------|
| AA01B0GR99  | 0.930745978 | 0   | 0   | 3   | 0  | 2   | 0   | 0   | 2 U6 snRNA-associated Sm-like protein Lsm4 OS=Mus musculus GN=Lsm4 PE=1 SV=1                                                          |                                                                |
| B1AXN9      | 0.997662484 | 5   | 0   | 4   | 0  | 3   | 4   | 0   | 2 Ribosomal protein S6 kinase alpha-3 OS=Mus musculus GN=Rp6k3 PE=1 SV=1                                                              |                                                                |
| P18554      | 0.997662484 | 5   | 0   | 4   | 0  | 3   | 4   | 0   | 2 Ribosomal protein S6 kinase alpha-3 OS=Mus musculus GN=Rp6k3 PE=1 SV=2                                                              |                                                                |
| AA0AUI1RPX4 | 0.01270274  | 27  | 17  | 18  | 6  | 14  | 12  | 0   | 8 Mitogen-activated protein kinase (Fragment) OS=Mus musculus GN=Mapk3 PE=1 SV=1                                                      |                                                                |
| E0CYT5      | 0.169102411 | 9   | 18  | 10  | 7  | 0   | 5   | 11  | 6 Cullin-2 (Fragment) OS=Mus musculus GN=Cul2 PE=1 SV=1                                                                               |                                                                |
| Q8K1R7      | 0.922372567 | 4   | 3   | 0   | 0  | 2   | 3   | 0   | 2 Serine/threonine-protein kinase Nek9 OS=Mus musculus GN=Nek9 PE=1 SV=2                                                              |                                                                |
| Q8UJUC      | 0.65501893  | 69  | 61  | 61  | 31 | 41  | 31  | 38  | 37 N-alpha-acetyltransferase 15, N1a OS=Mus musculus GN=Naa15 PE=1 SV=1                                                               |                                                                |
| AA0AMU1RPZ0 | 0.121810575 | 18  | 10  | 13  | 6  | 8   | 9   | 9   | 5 Mitogen-activated protein kinase (Fragment) OS=Mus musculus GN=Mapk3 PE=1 SV=1                                                      |                                                                |
| P26516      | 0.001020643 | 25  | 24  | 23  | 10 | 13  | 12  | 9   | 20 26S proteasome non-ATPase regulatory subunit 7 OS=Mus musculus GN=Pand7 PE=1 SV=2                                                  |                                                                |
| Q35593      | 0.016754962 | 10  | 10  | 16  | 5  | 6   | 6   | 8   | 7 26S proteasome non-ATPase regulatory subunit 14 OS=Mus musculus GN=Pand14 PE=1 SV=2                                                 |                                                                |
| Q6F959      | 0.253914747 | 21  | 20  | 24  | 2  | 14  | 14  | 3   | 13 Exportin-1 OS=Mus musculus GN=Xpo1 PE=1 SV=1                                                                                       |                                                                |
| P46446      | 0.340115461 | 5   | 7   | 4   | 4  | 4   | 0   | 0   | 3 Vecicle-fusing ATPase OS=Mus musculus GN=Vesf1 PE=1 SV=2                                                                            |                                                                |
| Q8BML9      | 0.181011248 | 22  | 12  | 27  | 3  | 17  | 8   | 6   | 11 Glutamylyl-tRNA synthetase OS=Mus musculus GN=Qars PE=1 SV=1                                                                       |                                                                |
| D3Z1S8      | 0.181011248 | 22  | 12  | 27  | 3  | 17  | 8   | 6   | 11 Protein Qars OS=Mus musculus GN=Qars PE=1 SV=2                                                                                     |                                                                |
| P47964      | 0.409750496 | 6   | 0   | 7   | 0  | 3   | 4   | 6   | 4 60S ribosomal protein L36 OS=Mus musculus GN=Rpl36 PE=3 SV=2                                                                        |                                                                |
| P11983      | 0.000993688 | 18  | 128 | 147 | 42 | 39  | 79  | 56  | 2 Protein phosphatase 1 subunit alpha OS=Mus musculus GN=PPP1 PE=1 SV=3                                                               |                                                                |
| AA0AUI1RNT6 | 0.598321889 | 13  | 10  | 0   | 0  | 13  | 7   | 3   | 7 S-adenosylmethionine synthase OS=Mus musculus GN=Mat2a PE=1 SV=1                                                                    |                                                                |
| Q9CQR2      | 0.228410662 | 5   | 0   | 0   | 0  | 3   | 2   | 3   | 5 40S ribosomal protein S21 OS=Mus musculus GN=Rps21 PE=1 SV=1                                                                        |                                                                |
| P60229      | 0.115446123 | 21  | 10  | 14  | 0  | 10  | 8   | 7   | 14 Eukaryotic translation initiation factor 3 subunit E OS=Mus musculus GN=Elf3e PE=1 SV=1                                            |                                                                |
| P63276      | 0.493140713 | 12  | 6   | 6   | 2  | 12  | 5   | 2   | 4 40S ribosomal protein S17 OS=Mus musculus GN=Rps17 PE=1 SV=2                                                                        |                                                                |
| Q8VEE4      | 0.010818426 | 13  | 15  | 14  | 6  | 3   | 8   | 8   | 12 Replication protein A 70 kDa DNA-binding subunit OS=Mus musculus GN=Rpa1 PE=1 SV=1                                                 |                                                                |
| Q63844      | 0.009816458 | 28  | 17  | 19  | 6  | 15  | 12  | 10  | 8 Mitogen-activated protein kinase 3 OS=Mus musculus GN=Mapk3 PE=1 SV=5                                                               |                                                                |
| Q6FP2H      | 0.025639357 | 9   | 9   | 6   | 4  | 6   | 0   | 0   | 3 Transartin-3 OS=Mus musculus GN=Topo3 PE=1 SV=1                                                                                     |                                                                |
| P635V1      | 0.027828502 | 12  | 8   | 5   | 7  | 4   | 6   | 9   | 17 Protein Gln493 OS=Mus musculus GN=Gln493 PE=1 SV=1                                                                                 |                                                                |
| Q61768      | 0.036791198 | 18  | 21  | 24  | 7  | 16  | 13  | 6   | 10 Kinesin-1 heavy chain OS=Mus musculus GN=Kif5b PE=1 SV=3                                                                           |                                                                |
| A2A4X6      | 0.302685824 | 6   | 3   | 5   | 0  | 3   | 0   | 0   | 3 MCG21910 OS=Mus musculus GN=Gim12355 PE=4 SV=1                                                                                      |                                                                |
| Q8K3W0      | 0.617970488 | 5   | 6   | 3   | 0  | 0   | 2   | 2   | 5 BRCA1-A complex subunit BRE OS=Mus musculus GN=Bre PE=1 SV=2                                                                        |                                                                |
| Q8H544      | 0.997662422 | 8   | 59  | 28  | 39 | 28  | 39  | 32  | 49 26S proteasome non-ATPase regulatory subunit 6 OS=Mus musculus GN=Pand2 PE=1 SV=1                                                  |                                                                |
| Q3LUL5      | 0.031859845 | 55  | 41  | 42  | 10 | 26  | 23  | 16  | 30 DNA helicase OS=Mus musculus GN=Mem6 PE=1 SV=1                                                                                     |                                                                |
| P97311      | 0.031859845 | 55  | 41  | 42  | 10 | 26  | 23  | 16  | 30 DNA replication licensing factor MCM6 OS=Mus musculus GN=Mcm6 PE=1 SV=1                                                            |                                                                |
| P63168      | 0.189808018 | 10  | 15  | 33  | 4  | 11  | 11  | 8   | 16 Dynein light chain 1, cytoplasmic OS=Mus musculus GN=Dynll1 PE=1 SV=1                                                              |                                                                |
| Q99J74      | 0.024299795 | 25  | 45  | 25  | 11 | 14  | 14  | 3   | 25 26S proteasome non-ATPase regulatory subunit 3 OS=Mus musculus GN=Pand6 PE=1 SV=1                                                  |                                                                |
| Q99ND8      | 0.085866226 | 133 | 98  | 95  | 18 | 72  | 42  | 36  | 69 Elongation factor 1-gamma OS=Mus musculus GN=Elf1g PE=1 SV=3                                                                       |                                                                |
| Q8CIN4      | 0.565758381 | 0   | 5   | 6   | 0  | 5   | 2   | 0   | 0 Serine/threonine-protein kinase PAK 2 OS=Mus musculus GN=PAK2 PE=1 SV=1                                                             |                                                                |
| P62334      | 0.068765688 | 46  | 43  | 40  | 8  | 23  | 19  | 18  | 27 26S protease regulatory subunit 10B OS=Mus musculus GN=Pam6c PE=1 SV=1                                                             |                                                                |
| Q3TUE1      | 0.459658252 | 3   | 3   | 3   | 0  | 3   | 2   | 2   | 2 Far upstream element-binding protein 1 OS=Mus musculus GN=Fu1p1 PE=1 SV=1                                                           |                                                                |
| Q3LULU      | 0.459658252 | 5   | 3   | 3   | 0  | 3   | 0   | 2   | 2 Far upstream element-binding protein 1 OS=Mus musculus GN=Fu1p1 PE=1 SV=1                                                           |                                                                |
| AA0A02JFV5  | 0.459658252 | 5   | 3   | 3   | 0  | 3   | 0   | 2   | 2 Far upstream element-binding protein 1 OS=Mus musculus GN=Fu1p1 PE=1 SV=1                                                           |                                                                |
| Q911W8      | 0.459658252 | 5   | 3   | 3   | 0  | 3   | 0   | 2   | 2 Far upstream element-binding protein 1 OS=Mus musculus GN=Fu1p1 PE=1 SV=1                                                           |                                                                |
| AA0A02JGW9  | 0.459658252 | 5   | 3   | 3   | 0  | 3   | 0   | 2   | 2 Far upstream element-binding protein 1 OS=Mus musculus GN=Fu1p1 PE=1 SV=1                                                           |                                                                |
| Q91D86      | 0.099811362 | 9   | 8   | 8   | 4  | 8   | 4   | 4   | 3 Protein PRDCC1 OS=Mus musculus GN=Prdca1 PE=1 SV=1                                                                                  |                                                                |
| B2RQ51      | 0.079117084 | 10  | 8   | 8   | 4  | 3   | 8   | 4   | 4 Striatin-3 OS=Mus musculus GN=Strn3 PE=1 SV=1                                                                                       |                                                                |
| Q9ERG2      | 0.079117084 | 10  | 8   | 8   | 4  | 3   | 8   | 4   | 4 Striatin-3 OS=Mus musculus GN=Strn3 PE=1 SV=1                                                                                       |                                                                |
| Q5WSU9      | 0.059991557 | 29  | 4   | 16  | 28 | 6   | 10  | 14  | 10                                                                                                                                    | 16 Acetyl-CoA carboxylase 1 OS=Mus musculus GN=Acaca PE=1 SV=1 |
| P25117      | 0.53197102  | 6   | 4   | 8   | 0  | 4   | 2   | 0   | 6 Cytochrome acetonitrile hydratase OS=Mus musculus GN=Acnol PE=1 SV=3                                                                |                                                                |
| Q68FD5      | 0.004190833 | 416 | 294 | 302 | 95 | 189 | 175 | 130 | 204 Clathrin heavy chain 1 OS=Mus musculus GN=Clec1 PE=1 SV=3                                                                         |                                                                |
| Q921N5      | 0.00958943  | 34  | 28  | 33  | 13 | 24  | 14  | 11  | 19 Spliceosome RNA helicase Ddx39b OS=Mus musculus GN=Ddx39b PE=1 SV=1                                                                |                                                                |
| D3Z2G6      | 0.01415292  | 28  | 17  | 19  | 6  | 13  | 12  | 10  | 8 Mitogen-activated protein kinase OS=Mus musculus GN=Mapk3 PE=1 SV=1                                                                 |                                                                |
| Q99K48      | 0.090055955 | 25  | 19  | 19  | 14 | 12  | 7   | 11  | 10 Non-putative domain-containing octanone-binding protein OS=Mus musculus GN=Nono PE=1 SV=3                                          |                                                                |
| Q5SWN2      | 0.01149175  | 15  | 15  | 14  | 6  | 3   | 8   | 8   | 11 Replication protein A 70 kDa DNA-binding subunit OS=Mus musculus GN=Rpa1 PE=1 SV=2                                                 |                                                                |
| D3Z1S1      | 0.173907262 | 9   | 16  | 8   | 7  | 9   | 4   | 6   | 6 Septin-2 (Fragment) OS=Mus musculus GN=Sept2 PE=1 SV=1                                                                              |                                                                |
| AA0A02JF23  | 0.20073407  | 6   | 0   | 0   | 0  | 4   | 3   | 4   | 4 Malate dehydrogenase (Fragment) OS=Mus musculus GN=Mdh3 PE=1 SV=1                                                                   |                                                                |
| Q8K1M6      | 0.59459988  | 14  | 12  | 0   | 0  | 11  | 11  | 11  | 7 Dynein heavy chain protein OS=Mus musculus GN=Dnm1 PE=1 SV=2                                                                        |                                                                |
| GLUVV7      | 0.972187024 | 0   | 0   | 4   | 0  | 3   | 0   | 0   | 0 240S ribosomal protein S28 (Fragment) OS=Mus musculus GN=Rps28 PE=1 SV=1                                                            |                                                                |
| P62858      | 0.972187024 | 0   | 0   | 4   | 0  | 3   | 0   | 0   | 0 240S ribosomal protein S28 OS=Mus musculus GN=Rps28 PE=1 SV=1                                                                       |                                                                |
| Q65889      | 0.985294829 | 9   | 0   | 6   | 0  | 6   | 0   | 0   | 4 40S ribosomal protein S24 OS=Mus musculus GN=Rps24 PE=1 SV=1                                                                        |                                                                |
| Q90MT2      | 0.044322569 | 14  | 12  | 6   | 12 | 26  | 21  | 21  | 29 US small nuclear ribonucleoprotein D2 OS=Mus musculus GN=Smrnp200 PE=1 SV=1                                                        |                                                                |
| H3BK16      | 0.099216098 | 52  | 44  | 41  | 7  | 21  | 22  | 18  | 28 S-formylglutathione hydrolase OS=Mus musculus GN=Edf PE=1 SV=1                                                                     |                                                                |
| Q9R0P3      | 0.099216098 | 52  | 44  | 41  | 7  | 21  | 22  | 18  | 28 S-formylglutathione hydrolase OS=Mus musculus GN=Edf PE=1 SV=1                                                                     |                                                                |
| AA01A5RMD8  | 0.005864001 | 9   | 7   | 7   | 3  | 0   | 0   | 0   | 4 CCR4-NOT transcription complex subunit 1 OS=Mus musculus GN=Cnot1 PE=1 SV=1                                                         |                                                                |
| Q90GL2      | 0.038367273 | 4   | 2   | 4   | 0  | 0   | 0   | 0   | 4 Cytoskeleton initiation factor subunit 1 OS=Mus musculus GN=Cif1 PE=1 SV=1                                                          |                                                                |
| Q90T15      | 0.043193753 | 3   | 3   | 5   | 2  | 2   | 0   | 0   | 0 Putative RNA-binding protein Luc7-like 2 OS=Mus musculus GN=Luc7l2 PE=1 SV=1                                                        |                                                                |
| P63085      | 0.082277381 | 33  | 19  | 20  | 6  | 9   | 16  | 12  | 11 Mitogen-activated protein kinase 1 OS=Mus musculus GN=Mapk1 PE=1 SV=1                                                              |                                                                |
| Q070194     | 0.032713116 | 22  | 16  | 17  | 2  | 15  | 8   | 7   | 5 Eukaryotic translation initiation factor 3 subunit D OS=Mus musculus GN=Elf3d PE=1 SV=2                                             |                                                                |
| H3BLJ6      | 0.090321319 | 25  | 44  | 44  | 3  | 21  | 22  | 14  | 27 S-formylglutathione hydrolase OS=Mus musculus GN=Edf PE=1 SV=1                                                                     |                                                                |
| P52293      | 0.006257337 | 15  | 7   | 15  | 4  | 8   | 4   | 5   | 8 Importin subunit alpha-1 OS=Mus musculus GN=Kpna2 PE=1 SV=2                                                                         |                                                                |
| Q03145      | 0.07289422  | 18  | 8   | 16  | 4  | 0   | 7   | 7   | 7 Ephrin type-A receptor 2 OS=Mus musculus GN=Epha2 PE=1 SV=2                                                                         |                                                                |
| P54775      | 0.017087401 | 60  | 78  | 77  | 40 | 27  | 27  | 35  | 66 26S protease regulatory subunit 6B OS=Mus musculus GN=Pam6c PE=1 SV=2                                                              |                                                                |
| Q497W9      | 0.170890156 | 81  | 49  | 53  | 5  | 38  | 28  | 16  | 32 DEAH (Asp-Glu-Ala-His) box polypeptide 15 OS=Mus musculus GN=Dhx15 PE=1 SV=1                                                       |                                                                |
| Q8I2Z5      | 0.80389702  | 6   | 0   | 6   | 0  | 4   | 3   | 0   | 3 Phosphotyrosine phosphatase beta isoform OS=Mus musculus GN=Ptpnb PE=1 SV=1                                                         |                                                                |
| P53811      | 0.89389702  | 6   | 0   | 5   | 0  | 4   | 3   | 0   | 3 Phosphatidylinositol transfer protein beta isoform OS=Mus musculus GN=Ptpnb PE=1 SV=2                                               |                                                                |
| Q8IZQ9      | 0.095685737 | 62  | 49  | 50  | 8  | 21  | 30  | 19  | 32 Eukaryotic translation initiation factor 3 subunit B OS=Mus musculus GN=Elf3b PE=1 SV=1                                            |                                                                |
| Q9ERF3      | 0.164683844 | 4   | 2   | 4   | 0  | 0   | 2   | 0   | 0 WD repeat-containing protein 61 OS=Mus musculus GN=Wdr61 PE=1 SV=1                                                                  |                                                                |
| Q8BVQ2      | 0.164683844 | 4   | 2   | 4   | 0  | 0   | 2   | 0   | 0 WD repeat-containing protein 61 OS=Mus musculus GN=Wdr61 PE=1 SV=1                                                                  |                                                                |
| Q8BVQ0      | 0.164683844 | 4   | 2   | 4   | 0  | 0   | 2   | 0   | 0 Putative uncharacterized protein OS=Mus musculus GN=Wdr61 PE=1 SV=1                                                                 |                                                                |
| D6RDCT      | 0.164683844 | 4   | 2   | 4   | 0  | 0   | 2   | 0   | 0 Putative uncharacterized protein OS=Mus musculus GN=Wdr61 PE=1 SV=1                                                                 |                                                                |
| Q6WKZ8      | 0.24018457  | 5   | 2   | 3   | 0  | 0   | 0   | 0   | 0 E3 ubiquitin-protein ligase UBR2 OS=Mus musculus GN=Ubr2 PE=1 SV=2                                                                  |                                                                |
| A2AN08      | 0.004292329 | 24  | 24  | 34  | 12 | 12  | 17  | 10  | 11 E3 ubiquitin-protein ligase UBR4 OS=Mus musculus GN=Ubr4 PE=1 SV=1                                                                 |                                                                |
| AA0AR4J008  | 0.015162576 | 17  | 12  | 19  | 2  | 10  | 0   | 5   | 0 Histone deacetylase OS=Mus musculus GN=Hdac2 PE=1 SV=1                                                                              |                                                                |
| Q3TTF6      | 0.024930486 | 4   | 8   | 6   | 2  | 0   | 0   | 0   | 0 Putative uncharacterized protein OS=Mus musculus GN=Ppp2r1b PE=1 SV=1                                                               |                                                                |
| H3BKU1      | 0.024930486 | 4   | 8   | 6   | 2  | 0   | 0   | 0   | 0 Protein phosphatase 2 (Formerly 2A), regulatory subunit A (PK 65), beta isoform, isoform CRA_b OS=Mus musculus GN=Ppp2r1b PE=1 SV=1 |                                                                |
| Q1LW584     | 0.024930486 | 4   | 8   | 6   | 2  | 0   | 0   | 0   | 0 Serine/threonine-protein phosphatase 2A beta regulatory subunit A beta isoform OS=Mus musculus GN=Ppp2r1b PE=1 SV=1                 |                                                                |
| HBL00       | 0.024930486 | 4   | 8   | 6   | 2  | 0   | 0   | 0   | 0 Serine/threonine-protein phosphatase 2A beta regulatory subunit A beta isoform OS=Mus musculus GN=Ppp2r1b PE=1 SV=1                 |                                                                |
| EPVVA8      | 0.075655815 | 18  | 11  | 22  | 4  | 9   | 9   | 5   | 10 eIF-2-alpha kinase activator GCN1 OS=Mus musculus GN=Gcn1 PE=1 SV=1                                                                |                                                                |
| AA0A01RQ71  | 0.438224859 | 5   | 0   | 5   | 0  | 0   | 0   | 0   | 0 40S ribosomal protein S13 OS=Mus musculus GN=Rps13 PE=1 SV=1                                                                        |                                                                |
| P60676      | 0.703915995 | 5   | 0   | 5   | 0  | 0   | 0   | 0   | 0 Serine protein leucylaminase protein 4 homolog OS=Mus musculus GN=Npl6d4 PE=1 SV=3                                                  |                                                                |
| GLUWV9      | 0.748345559 | 0   | 0   | 10  | 0  | 0   | 0   | 0   | 0 Proteasome activator complex subunit 1 (Fragment) OS=Mus musculus GN=Panel1 PE=1 SV=1                                               |                                                                |
| Q31XS7      | 0.002910618 | 42  | 38  | 31  | 11 | 23  | 19  | 13  | 18 26S proteasome non-ATPase regulatory subunit 1 OS=Mus musculus GN=Pand1 PE=1 SV=1                                                  |                                                                |
| Q90DR2      | 0.24624495  | 68  | 36  | 47  | 2  | 27  | 22  | 19  | 23 Threonine-c-RNA ligase, cytoplasmic OS=Mus musculus GN=Tars PE=1 SV=2                                                              |                                                                |
| Q9JDL8      | 0.651621678 | 7   | 5   | 11  | 3  | 7   | 5   | 6   | 6 mRNA cap guanine-N7 methyltransferase OS=Mus musculus GN=Rim2 PE=1 SV=1                                                             |                                                                |
| E0CYT3      | 0.777203558 | 14  | 4   | 5   | 0  | 2   | 3   | 0   | 0 Heat shock 70 kDa protein 4L (Fragment) OS=Mus musculus GN=Hspa4l PE=1 SV=1                                                         |                                                                |
| P25206      | 0.038992669 | 17  | 13  | 26  | 5  | 11  | 11  | 9   | 5 DNA replication licensing factor MCM3 OS=Mus musculus GN=Mcm3 PE=1 SV=2                                                             |                                                                |
| AA0AR4J049  | 0.002463412 | 18  | 15  | 13  | 5  | 7   | 8   | 4   | 11 Protein arginine N-methyltransferase OS=Mus musculus GN=Prrm5 PE=1 SV=1                                                            |                                                                |
| G3LXJ6      | 0.116391009 | 17  | 18  | 17  | 10 | 10  | 10  | 10  | 10 Spliceosome RNA helicase Ddx39b (Fragment) OS=Mus musculus GN=Ddx39b PE=1 SV=1                                                     |                                                                |
| P19253      | 0.635577941 | 5   | 6   | 12  | 0  | 6   | 6   | 2   | 2 60S ribosomal protein L13a OS=Mus musculus GN=Rpl13a PE=1 SV=4                                                                      |                                                                |
| Q8CGC7      | 0.004590521 | 164 | 134 | 131 | 39 | 69  | 68  | 51  | 85 Bifunctional glutamate/proline-tRNA ligase OS=Mus musculus GN=Eprs PE=1 SV=4                                                       |                                                                |
| AA0A02JG00  | 0.905365696 | 5   | 3   | 0   | 0  | 3   | 0   | 2   | 2 Far upstream element-binding protein 1 OS=Mus musculus GN=Fu1p1 PE=1 SV=1                                                           |                                                                |
| J3K3M02     | 0.007502078 | 44  | 24  | 42  | 14 | 19  | 11  | 16  | 22 Protein Gln5422 OS=Mus musculus GN=Gln5422 PE=1 SV=1                                                                               |                                                                |
| Q9K9K6      | 0.171264634 | 23  | 19  | 22  | 5  | 8   | 14  | 7   | 15 19 Nucleophosmin OS=Mus musculus GN=Npm1 PE=1 SV=1                                                                                 |                                                                |
| Q9R0E1      | 0.001179949 | 19  | 17  | 10  | 4  | 11  | 11  | 3   | 4 Procollagen-lysine-2-oxoglutarate 5-dioxygenase 3 OS=Mus musculus GN=Plod3 PE=1 SV=1                                                |                                                                |
| P54823      | 0.571570099 | 15  | 14  | 15  | 0  | 12  | 7   | 4   | 11 Probable ATP-dependent RNA helicase DDXX OS=Mus musculus GN=DDX6 PE=1 SV=1                                                         |                                                                |
| Q5WS19      | 0.006960615 | 19  | 18  | 20  | 7  | 11  | 7   | 9   | 10 Clustered mitochondrial protein homolog OS=Mus musculus GN=Cdhb PE=1 SV=2                                                          |                                                                |
| AA0AR4J140  | 0.006960615 | 19  | 18  | 20  | 7  | 11  | 7   | 9   | 10 Clustered mitochondrial protein homolog OS=Mus musculus GN=Cdhb PE=1 SV=1                                                          |                                                                |
| P21278      | 0.0587275   | 8   | 9   | 11  | 2  | 4   | 5   | 0   | 0 Guanine nucleotide-binding protein subunit alpha-11 OS=Mus musculus GN=Gna11 PE=1 SV=1                                              |                                                                |
| Q8BWV6      | 0.397256345 | 5   | 4   | 5   | 0  | 2   | 3   | 0   | 3 Eukaryotic translation initiation factor 2A OS=Mus musculus GN=Elf2a PE=1 SV=2                                                      |                                                                |
| AA01B0G570  | 0.47482706  | 4   | 6   | 4   | 0  | 3   | 0   | 2   | 3 Proteasome endopeptidase complex OS=Mus musculus GN=Pamal PE=1 SV=1                                                                 |                                                                |
| Q08759      | 0.002071619 | 8   | 4   | 0   | 0  | 0   | 0   | 0   | 0 Ubiquitin-protein ligase E3A OS=Mus musculus GN=Uba3 PE=1 SV=2                                                                      |                                                                |
| Q08582      | 0.070748183 | 5   | 4   | 2   | 3  | 2   | 0   | 0   | 0 GTP-binding protein 1 OS=Mus musculus GN=Gtpbp1 PE=1 SV=2                                                                           |                                                                |
| Q3U4X8      | 0.202527389 | 6   | 3   | 12  | 0  | 4   | 0   | 0   | 0 DNA ligase OS=Mus musculus GN=Lig1 PE=1 SV=1                                                                                        |                                                                |
| P57913      | 0.202527389 | 6   | 3   | 12  | 0  | 4   | 0   | 0   | 0 DNA ligase 1 OS=Mus musculus GN=Lig1 PE=1 SV=2                                                                                      |                                                                |
| Q3LYS2      | 0.347532812 | 6   | 0   | 6   | 0  | 0   | 0   | 0   | 0 Protein ubiquitin carboxyl-terminal hydrolase FAF-X (Fragment) OS=Mus musculus GN=Usp9x PE=1 SV=1                                   |                                                                |
| Q99KE1      | 0.365531693 | 0   | 4   | 3   | 0  | 2   | 0   | 0   | 0 NAD-dependent malic enzyme, mitochondrial OS=Mus musculus GN=Me2 PE=1 SV=1                                                          |                                                                |
| P51807      | 0.694813806 | 6   | 0   | 8   | 0  | 4   | 4   | 4   | 4 Dynein light chain Tctex-type 1 OS=Mus musculus GN=Dynll1 PE=1 SV=1                                                                 |                                                                |
| Q08Z67      | 0.475986993 | 14  | 12  | 25  | 0  | 0   | 7   | 8   | 14 MCM49550 OS=Mus musculus GN=BCO48507 PE=1 SV=1                                                                                     |                                                                |
| H3IBP2      | 0.002035521 | 4   | 4   | 11  | 5  | 8   | 21  | 22  | 11 5-formyltetrahydrofolate hydrolase (Fragment) OS=Mus musculus GN=Edf PE=                                                           |                                                                |

|             |             |     |     |     |    |    |    |    |                                                                                                                                       |
|-------------|-------------|-----|-----|-----|----|----|----|----|---------------------------------------------------------------------------------------------------------------------------------------|
| Q8C266      | 0.40968588  | 8   | 8   | 13  | 0  | 5  | 3  | 0  | 7 Putative uncharacterized protein OS-Mus musculus GN-Rbc5c PE=1 SV=1                                                                 |
| Q91VC3      | 0.036944523 | 53  | 33  | 43  | 9  | 14 | 24 | 12 | 21 Eukaryotic initiation factor 4A-III OS-Mus musculus GN-EIf4a3 PE=1 SV=3                                                            |
| Q9JMT6      | 0.03703161  | 34  | 21  | 25  | 16 | 10 | 20 | 8  | 9 Actin-related protein 2/3 complex subunit 3 OS-Mus musculus GN-Arcep3 PE=1 SV=3                                                     |
| Q9HRH7      | 0.011073152 | 17  | 14  | 8   | 4  | 2  | 6  | 0  | 5 Insulin-degrading enzyme OS-Mus musculus GN-Ide PE=1 SV=1                                                                           |
| E9Q519      | 0.145230243 | 31  | 24  | 30  | 3  | 5  | 15 | 9  | 16 26S proteasome non-ATPase regulatory subunit 13 OS-Mus musculus GN-Pam13 PE=1 SV=1                                                 |
| D3Z124      | 0.407716427 | 9   | 9   | 7   | 0  | 5  | 4  | 5  | 3 DNA-(apurinic or apyrimidinic site) lyase (Fragment) OS-Mus musculus GN-Apex1 PE=1 SV=1                                             |
| P49717      | 0.002361299 | 50  | 46  | 44  | 15 | 24 | 18 | 17 | 20 DNA replication licensing factor MCM4 OS-Mus musculus GN-Mcm4 PE=1 SV=1                                                            |
| A0A0140T8L5 | 0.002599224 | 126 | 104 | 101 | 40 | 33 | 35 | 39 | 4 Protein DnaK OS-Mus musculus GN-Rpc2-p6 PE=1 SV=1                                                                                   |
| E9QK80      | 0.00368425  | 120 | 97  | 86  | 37 | 42 | 38 | 36 | 55 Guanine nucleotide-binding protein G(I)/G(S)/G(T) subunit beta-2 OS-Mus musculus GN-Gmb2 PE=1 SV=1                                 |
| P62880      | 0.004031638 | 121 | 97  | 86  | 37 | 42 | 38 | 36 | 55 Guanine nucleotide-binding protein G(I)/G(S)/G(T) subunit beta-2 OS-Mus musculus GN-Gmb2 PE=1 SV=3                                 |
| A0A087W0Q6  | 0.026670355 | 9   | 8   | 11  | 0  | 6  | 3  | 0  | 5 Nucleolar protein 58 (Fragment) OS-Mus musculus GN-Nop58 PE=1 SV=1                                                                  |
| F6VW30      | 0.003725883 | 89  | 82  | 70  | 44 | 22 | 26 | 26 | 67 14-3-3 protein beta (Fragment) OS-Mus musculus GN-Yshap PE=1 SV=1                                                                  |
| F6VY24      | 0.002979791 | 125 | 104 | 103 | 46 | 26 | 25 | 43 | 95 Protein Gm576 OS-Mus musculus GN-Gm576 PE=3 SV=2                                                                                   |
| O88544      | 0.01581993  | 17  | 8   | 12  | 3  | 7  | 4  | 0  | 4 COP9 signalosome complex subunit 4 OS-Mus musculus GN-Cop4 PE=1 SV=1                                                                |
| A0A0UG2JDF8 | 0.018822119 | 7   | 8   | 10  | 3  | 5  | 2  | 0  | 4 Serratia RNA effector molecule homolog (Fragment) OS-Mus musculus GN-Srrt PE=1 SV=1                                                 |
| E9VFX1      | 0.034983958 | 5   | 5   | 8   | 0  | 0  | 0  | 0  | 4 Cullin-8 OS-Mus musculus GN-Cul8 PE=1 SV=1                                                                                          |
| A2A432      | 0.034983958 | 5   | 8   | 12  | 7  | 0  | 0  | 0  | 4 Cullin-8 OS-Mus musculus GN-Cul8 PE=1 SV=1                                                                                          |
| Q8K1K2      | 0.046991785 | 19  | 20  | 16  | 3  | 11 | 8  | 2  | 8 26S proteasome regulatory subunit 8 OS-Mus musculus GN-Pam5 PE=1 SV=1                                                               |
| A2AGT5      | 0.048739816 | 5   | 3   | 4   | 4  | 0  | 0  | 0  | 2 Cytoskeleton-associated protein 5 OS-Mus musculus GN-Ckap5 PE=1 SV=1                                                                |
| Z4VY18      | 0.048739816 | 5   | 3   | 4   | 4  | 0  | 0  | 0  | 2 Cytoskeleton-associated protein 5 OS-Mus musculus GN-Ckap5 PE=1 SV=1                                                                |
| K3W4R5      | 0.048739816 | 5   | 3   | 4   | 4  | 0  | 0  | 0  | 2 Cytoskeleton-associated protein 5 OS-Mus musculus GN-Ckap5 PE=1 SV=1                                                                |
| A0A0R4J0K2  | 0.048739816 | 5   | 3   | 4   | 4  | 0  | 0  | 0  | 2 Cytoskeleton-associated protein 5 OS-Mus musculus GN-Ckap5 PE=1 SV=1                                                                |
| Q61210      | 0.086995489 | 5   | 0   | 5   | 2  | 2  | 0  | 0  | 0 Rho guanine nucleotide exchange factor 1 OS-Mus musculus GN-Arhgef1 PE=1 SV=2                                                       |
| E9VQ28      | 0.086995489 | 5   | 0   | 5   | 2  | 2  | 0  | 0  | 0 Rho guanine nucleotide exchange factor 1 (Fragment) OS-Mus musculus GN-Arhgef1 PE=1 SV=1                                            |
| F6ZNE1      | 0.086995489 | 5   | 0   | 5   | 2  | 2  | 0  | 0  | 0 Rho guanine nucleotide exchange factor 1 (Fragment) OS-Mus musculus GN-Arhgef1 PE=1 SV=1                                            |
| F6QKK2      | 0.17099986  | 5   | 4   | 3   | 0  | 0  | 2  | 2  | 0 ADRP-ribosylation factor-like protein 8A (Fragment) OS-Mus musculus GN-Arifa PE=1 SV=1                                              |
| Q8VHE3      | 0.17099986  | 5   | 4   | 3   | 0  | 0  | 2  | 2  | 0 ADRP-ribosylation factor-like protein 8A OS-Mus musculus GN-Arifa PE=1 SV=1                                                         |
| P97823      | 0.199743087 | 6   | 5   | 4   | 23 | 0  | 0  | 0  | 2 Acyl-protein thioesterase 1 OS-Mus musculus GN-Lyp1a PE=1 SV=1                                                                      |
| J9Q5P6      | 0.199743087 | 6   | 5   | 4   | 0  | 3  | 0  | 0  | 2 Acyl-protein thioesterase 1 OS-Mus musculus GN-Lyp1a PE=1 SV=1                                                                      |
| Q92AK8      | 0.213922502 | 8   | 5   | 5   | 0  | 3  | 0  | 0  | 3 Metastasis-associated protein MTA3 OS-Mus musculus GN-Mta3 PE=1 SV=1                                                                |
| Q3U3A7      | 0.213922502 | 8   | 5   | 5   | 0  | 3  | 0  | 0  | 3 Metastasis-associated protein MTA3 OS-Mus musculus GN-Mta3 PE=1 SV=1                                                                |
| Q3UII8      | 0.213922502 | 8   | 5   | 5   | 0  | 3  | 0  | 0  | 3 Metastasis-associated protein MTA3 OS-Mus musculus GN-Mta3 PE=1 SV=1                                                                |
| E9Q794      | 0.213922502 | 8   | 5   | 5   | 0  | 3  | 0  | 0  | 3 Metastasis-associated protein MTA3 OS-Mus musculus GN-Mta3 PE=1 SV=1                                                                |
| A2A8L1      | 0.21839457  | 3   | 3   | 6   | 0  | 0  | 0  | 0  | 2 Chromodomain-helicase-DNA-binding protein 5 OS-Mus musculus GN-Chd5 PE=1 SV=1                                                       |
| P0681       | 0.266412525 | 5   | 3   | 7   | 0  | 0  | 0  | 2  | 3 High mobility group protein R2 OS-Mus musculus GN-Hmgb2 PE=1 SV=3                                                                   |
| Q8CBY3      | 0.273430091 | 0   | 0   | 0   | 0  | 0  | 0  | 0  | 6 Ephrin type-B receptor 1 OS-Mus musculus GN-Efbb1 PE=1 SV=1                                                                         |
| Q8COZ1      | 0.391002219 | 4   | 0   | 0   | 2  | 2  | 0  | 0  | 0 Protein FAM234A OS-Mus musculus GN-Fam234 PE=1 SV=1                                                                                 |
| A0A140T8T4  | 0.487379102 | 0   | 0   | 0   | 0  | 3  | 0  | 0  | 0 Protein Rbp1-p6 OS-Mus musculus GN-Rbp1-p6 PE=4 SV=1                                                                                |
| EDCZ90      | 0.649650771 | 0   | 0   | 6   | 0  | 3  | 0  | 0  | 0 Proteasome activator complex subunit 2 (Fragment) OS-Mus musculus GN-Pamc2 PE=1 SV=1                                                |
| E9QM38      | 0.649650771 | 0   | 0   | 4   | 0  | 2  | 0  | 0  | 0 Solicate carrier family 12 member 2 OS-Mus musculus GN-Slc12a2 PE=1 SV=1                                                            |
| P55012      | 0.649650771 | 0   | 0   | 4   | 0  | 2  | 0  | 0  | 0 Solicate carrier family 12 member 2 OS-Mus musculus GN-Slc12a2 PE=1 SV=2                                                            |
| Q8C8Y8      | 0.649650771 | 0   | 0   | 4   | 0  | 2  | 0  | 0  | 0 Dynactin subunit 4 OS-Mus musculus GN-Dct4 PE=1 SV=1                                                                                |
| A0A0AGYW28  | 0.653248269 | 0   | 4   | 0   | 0  | 0  | 0  | 0  | 2 Ubiquitin carboxyl-terminal hydrolase 4 OS-Mus musculus GN-Ucp4 PE=1 SV=1                                                           |
| P35123      | 0.653248269 | 0   | 4   | 0   | 0  | 0  | 0  | 0  | 2 Ubiquitin carboxyl-terminal hydrolase 4 OS-Mus musculus GN-Ucp4 PE=1 SV=1                                                           |
| Q9VXK1      | 0.743124526 | 4   | 0   | 0   | 0  | 0  | 0  | 0  | 2 Proteasome activator complex subunit 4 OS-Mus musculus GN-Pamc4 PE=1 SV=2                                                           |
| Q9JBA4      | 0.743124526 | 4   | 0   | 0   | 0  | 0  | 0  | 0  | 2 Ribosome biogenesis protein WDR12 OS-Mus musculus GN-Wdr12 PE=1 SV=1                                                                |
| Q6P670      | 0.743124526 | 4   | 0   | 0   | 0  | 0  | 0  | 0  | 2 Integrin beta OS-Mus musculus GN-Igfb5 PE=1 SV=1                                                                                    |
| A0A0AGYVU8  | 0.743124526 | 4   | 0   | 0   | 0  | 0  | 0  | 0  | 2 MCC119397 OS-Mus musculus GN-Gm9774 PE=4 SV=1                                                                                       |
| Q9U309      | 0.743124526 | 4   | 0   | 0   | 0  | 0  | 0  | 0  | 2 Integrin beta OS-Mus musculus GN-Igfb5 PE=1 SV=2                                                                                    |
| G5EF8F      | 0.743124526 | 4   | 0   | 0   | 0  | 0  | 0  | 0  | 2 Integrin beta OS-Mus musculus GN-Igfb5 PE=1 SV=1                                                                                    |
| Q921W0      | 0.774293415 | 0   | 0   | 0   | 0  | 0  | 0  | 2  | 0 Charged multivesicular body protein 1a OS-Mus musculus GN-Chmp1a PE=1 SV=1                                                          |
| O55201      | 0.859892987 | 0   | 5   | 0   | 0  | 3  | 0  | 0  | 2 Transcription elongation factor SPT5 OS-Mus musculus GN-Supf5 PE=1 SV=1                                                             |
| P86254      | 0.860518205 | 81  | 47  | 42  | 23 | 26 | 0  | 0  | 67 14-3-3 protein beta OS-Mus musculus GN-Yshap PE=1 SV=1                                                                             |
| D3Z356      | 0.007895312 | 120 | 98  | 98  | 46 | 23 | 22 | 23 | 92 Protein Gm225 OS-Mus musculus GN-Gm225 PE=3 SV=1                                                                                   |
| A2AFK7      | 0.045423891 | 47  | 27  | 37  | 8  | 13 | 22 | 7  | 17 Eukaryotic initiation factor 4A-III (Fragment) OS-Mus musculus GN-EIf4a3 PE=1 SV=1                                                 |
| P62196      | 0.034697347 | 24  | 30  | 28  | 7  | 18 | 13 | 2  | 11 26S protease regulatory subunit 8 OS-Mus musculus GN-Pamc2 PE=1 SV=1                                                               |
| Q9VIA2      | 0.447235106 | 14  | 15  | 15  | 14 | 4  | 4  | 2  | 9 Methanase-rRNA ligase beta subunit OS-Mus musculus GN-Farb2 PE=1 SV=2                                                               |
| D3VYV1      | 0.004431373 | 123 | 103 | 109 | 46 | 24 | 30 | 47 | 86 40S ribosomal protein S2 (Fragment) OS-Mus musculus GN-Rps2 PE=1 SV=1                                                              |
| P28352      | 0.345037463 | 9   | 9   | 8   | 0  | 5  | 4  | 5  | 3 DNA-(apurinic or apyrimidinic site) lyase OS-Mus musculus GN-Apex1 PE=1 SV=2                                                        |
| F6QQQ6      | 0.42474004  | 9   | 9   | 8   | 0  | 3  | 5  | 0  | 5 Protein arginine N-methyltransferase 5 (Fragment) OS-Mus musculus GN-Pmat5 PE=1 SV=8                                                |
| Q3XVY9      | 0.061157295 | 17  | 17  | 10  | 3  | 3  | 5  | 4  | 5 Nuclear cap-binding protein beta OS-Mus musculus GN-Ncbp1 PE=1 SV=1                                                                 |
| GLUZD6      | 0.081495466 | 18  | 9   | 7   | 3  | 4  | 3  | 4  | 7 Ubiquitin conjugation factor E4 B OS-Mus musculus GN-Ube4b PE=1 SV=1                                                                |
| A0A0J9V30   | 0.199370798 | 10  | 14  | 4   | 9  | 5  | 4  | 5  | 4 Paxillin OS-Mus musculus GN-Pxn PE=1 SV=1                                                                                           |
| Q3UKV0      | 0.199370798 | 10  | 14  | 4   | 9  | 5  | 4  | 5  | 4 Paxillin OS-Mus musculus GN-Pxn PE=1 SV=1                                                                                           |
| F8VQZ8      | 0.199370798 | 10  | 14  | 4   | 9  | 5  | 4  | 5  | 4 Paxillin OS-Mus musculus GN-Pxn PE=1 SV=1                                                                                           |
| H7BWZ3      | 0.546173821 | 25  | 15  | 0   | 0  | 12 | 8  | 0  | 9 Actin-related protein 2/3 complex subunit 3 OS-Mus musculus GN-Arcep3 PE=1 SV=1                                                     |
| A0A087W8P1  | 0.114293821 | 12  | 6   | 7   | 0  | 0  | 4  | 0  | 0 Ubiquitin carboxyl-terminal hydrolase isozyme L5 (Fragment) OS-Mus musculus GN-Uch5l5 PE=1 SV=1                                     |
| D3VZ33      | 0.006586985 | 113 | 94  | 82  | 37 | 38 | 34 | 36 | 48 Guanine nucleotide-binding protein G(I)/G(S)/G(T) subunit beta-2 OS-Mus musculus GN-Gmb2 PE=1 SV=1                                 |
| F68P99      | 0.007630598 | 19  | 14  | 9   | 4  | 6  | 0  | 0  | 5 Insulin-degrading enzyme (Fragment) OS-Mus musculus GN-Ide PE=1 SV=1                                                                |
| A0A0M1R0Q5  | 0.022058445 | 3   | 26  | 23  | 17 | 12 | 12 | 0  | 4 Proteasome activator complex subunit 4 OS-Mus musculus GN-Pamc4 PE=1 SV=1                                                           |
| Q8VDM6      | 0.021104649 | 12  | 8   | 10  | 4  | 7  | 3  | 4  | 2 Heterogeneous nuclear ribonucleoprotein U-like protein 1 OS-Mus musculus GN-Hnruapl1 PE=1 SV=1                                      |
| O9OU86      | 0.018083317 | 70  | 48  | 63  | 14 | 32 | 17 | 10 | 32 Prolyl endopeptidase OS-Mus musculus GN-Prep PE=1 SV=1                                                                             |
| Q9QJ09      | 0.000717869 | 13  | 11  | 12  | 5  | 4  | 4  | 4  | 7 Methylosome protein 50 OS-Mus musculus GN-Wdr77 PE=1 SV=1                                                                           |
| Q9DC48      | 0.059002999 | 4   | 5   | 3   | 0  | 2  | 0  | 0  | 0 Protein processing factor 17 OS-Mus musculus GN-Gk40 PE=2 SV=1                                                                      |
| P15279      | 0.062979907 | 5   | 5   | 3   | 0  | 0  | 2  | 0  | 0 Ras-related protein Rab-6A OS-Mus musculus GN-Rab6a PE=1 SV=4                                                                       |
| Q3UKV0      | 0.075688068 | 4   | 4   | 5   | 0  | 0  | 0  | 2  | 0 Protein Eif2b3 OS-Mus musculus GN-Eif2b3 PE=1 SV=1                                                                                  |
| BI1AUN2     | 0.075688068 | 4   | 4   | 5   | 0  | 0  | 0  | 2  | 0 MCC11442 OS-Mus musculus GN-Eif2b3 PE=1 SV=1                                                                                        |
| BI1AUN3     | 0.075688068 | 4   | 4   | 5   | 0  | 0  | 0  | 2  | 0 Protein Eif2b3 OS-Mus musculus GN-Eif2b3 PE=1 SV=1                                                                                  |
| P58242      | 0.138682635 | 3   | 4   | 6   | 0  | 2  | 0  | 0  | 0 Acid sphingomyelinase-like phosphodiesterase 3b OS-Mus musculus GN-Smpd3b PE=1 SV=1                                                 |
| O8BQM4      | 0.18682723  | 5   | 5   | 3   | 0  | 0  | 0  | 0  | 2 HEAT repeat-containing protein 3 OS-Mus musculus GN-Heatr3 PE=1 SV=1                                                                |
| D5Z279      | 0.027631466 | 46  | 31  | 42  | 5  | 18 | 13 | 14 | 14 Cyclic nucleotide-dependent kinase 1 (Fragment) OS-Mus musculus GN-Cdk1 PE=1 SV=1                                                  |
| Q9VXJ3      | 0.009999004 | 29  | 27  | 15  | 9  | 10 | 12 | 10 | 18 SWI60-containing protein-associated actin-binding regulator of chromatin subfamily A member 5 OS-Mus musculus GN-Smarca5 PE=1 SV=1 |
| O9UD1C8     | 0.051207041 | 6   | 3   | 9   | 0  | 2  | 3  | 2  | 4 Vacuolar protein sorting-associated protein 28 homolog OS-Mus musculus GN-Vps28 PE=1 SV=1                                           |
| P62855      | 0.449083163 | 23  | 13  | 10  | 0  | 8  | 5  | 5  | 10 40S ribosomal protein S26 OS-Mus musculus GN-Rps26 PE=1 SV=3                                                                       |
| Q3TCH7      | 0.084106907 | 7   | 11  | 13  | 10 | 0  | 4  | 4  | 6 Cullin-4A OS-Mus musculus GN-Cul4a PE=1 SV=1                                                                                        |
| Q3VZ47      | 0.608671398 | 3   | 0   | 8   | 0  | 0  | 0  | 0  | 2 Nucleosome assembly protein 1-like A OS-Mus musculus GN-Nap11a PE=1 SV=1                                                            |
| Q8BU30      | 0.00119079  | 78  | 59  | 50  | 14 | 24 | 20 | 19 | 28 Isoleucine-rRNA ligase, cytoplasmic OS-Mus musculus GN-Iars PE=1 SV=2                                                              |
| F7D5L2      | 0.002094349 | 13  | 10  | 12  | 5  | 4  | 4  | 4  | 6 Methylosome protein 50 (Fragment) OS-Mus musculus GN-Wdr77 PE=1 SV=1                                                                |
| A0A1B0G568  | 0.142644836 | 5   | 5   | 10  | 0  | 0  | 0  | 2  | 0 Fms-related tyrosine kinase 3 ligand OS-Mus musculus GN-Flt3 PE=1 SV=1                                                              |
| Q9VCP9      | 0.225157863 | 7   | 6   | 7   | 4  | 4  | 4  | 3  | 2 Protein 2211001C8R4 OS-Mus musculus GN-2211001C8R4 PE=1 SV=1                                                                        |
| O8VDW0      | 0.01163721  | 37  | 20  | 25  | 5  | 17 | 6  | 6  | 10 ATP-dependent RNA helicase DDX39A OS-Mus musculus GN-Ddx39a PE=1 SV=1                                                              |
| Q3THK7      | 0.001755439 | 40  | 33  | 33  | 15 | 17 | 11 | 8  | 18 GMP synthase [glutamine-lysozylizing] OS-Mus musculus GN-Gmps PE=1 SV=1                                                            |
| O9QZD9      | 0.051734362 | 41  | 35  | 38  | 5  | 16 | 13 | 8  | 16 Eukaryotic translation initiation factor 3 subunit OS-Mus musculus GN-EIf3 PE=1 SV=1                                               |
| Q9XK63      | 0.399147424 | 3   | 2   | 10  | 2  | 2  | 2  | 0  | 3 Guanine nucleotide-binding protein gamma-2 OS-Mus musculus GN-Gnp2 PE=1 SV=1                                                        |
| O9PKA7      | 0.351351021 | 5   | 4   | 0   | 0  | 0  | 0  | 0  | 2 Dipetidyl peptidase 3 OS-Mus musculus GN-Dpp3 PE=1 SV=2                                                                             |
| P36916      | 0.353036241 | 0   | 5   | 4   | 0  | 2  | 2  | 0  | 0 Guanine nucleotide-binding protein-like 1 OS-Mus musculus GN-Gnl1 PE=1 SV=4                                                         |
| P32233      | 0.176347054 | 4   | 5   | 8   | 0  | 3  | 2  | 0  | 0 Developmentally-regulated GTP-binding protein 1 OS-Mus musculus GN-Drg1 PE=1 SV=1                                                   |
| O8BKC5      | 0.014985966 | 26  | 21  | 21  | 10 | 10 | 9  | 8  | 7 Importin-5 OS-Mus musculus GN-Import5 PE=1 SV=1                                                                                     |
| Q4EFS6      | 0.006244174 | 47  | 46  | 41  | 13 | 16 | 13 | 11 | 24 Probable ubiquitin carboxyl-terminal hydrolase FA-X OS-Mus musculus GN-Ucp9a PE=1 SV=1                                             |
| P70398      | 0.006244174 | 47  | 46  | 41  | 13 | 16 | 13 | 11 | 24 Probable ubiquitin carboxyl-terminal hydrolase FA-X OS-Mus musculus GN-Ucp9a PE=1 SV=2                                             |
| O8BY71      | 0.046494768 | 14  | 10  | 11  | 2  | 3  | 3  | 0  | 6 Histone acetyltransferase type B catalytic subunit OS-Mus musculus GN-Hat1 PE=1 SV=1                                                |
| A2ATU9      | 0.046494768 | 14  | 10  | 11  | 2  | 3  | 3  | 0  | 6 Histone acetyltransferase type B catalytic subunit OS-Mus musculus GN-Hat1 PE=1 SV=1                                                |
| P4K2K3      | 0.000959084 | 12  | 13  | 21  | 0  | 0  | 0  | 0  | 4 Cyclin-dependent kinase 4 OS-Mus musculus GN-Cdk4 PE=1 SV=1                                                                         |
| Q9VUP7      | 0.097915466 | 13  | 7   | 8   | 0  | 0  | 4  | 0  | 0 Ubiquitin carboxyl-terminal hydrolase isozyme L5 OS-Mus musculus GN-Uch5l5 PE=1 SV=2                                                |
| E9QOU1      | 0.024974368 | 18  | 11  | 17  | 3  | 4  | 5  | 5  | 7 26S proteasome non-ATPase regulatory subunit 13 OS-Mus musculus GN-Pam13 PE=1 SV=1                                                  |
| P54071      | 0.18452477  | 12  | 7   | 9   | 7  | 3  | 4  | 5  | 3 Isocitrate dehydrogenase [NADP], mitochondrial OS-Mus musculus GN-Ildh2 PE=1 SV=3                                                   |
| Q9VXZ8      | 0.219620278 | 8   | 7   | 6   | 0  | 2  | 4  | 0  | 3 SEC23-interacting protein OS-Mus musculus GN-Scs23ip PE=1 SV=1                                                                      |
| Q6N2C7      | 0.219620278 | 8   | 7   | 6   | 0  | 2  | 4  | 0  | 3 SEC23-interacting protein OS-Mus musculus GN-Scs23ip PE=1 SV=2                                                                      |
| A2A4J3      | 0.344910652 | 8   | 6   | 0   | 0  | 0  | 0  | 0  | 3 Proteasome activator complex subunit 3 (Fragment) OS-Mus musculus GN-Pamc3 PE=1 SV=1                                                |
| O54950      | 0.006677848 | 5   | 5   | 5   | 0  | 0  | 2  | 0  | 0 5'-AMP-activated protein kinase subunit gamma-1 OS-Mus musculus GN-Pkag1 PE=1 SV=2                                                  |
| O5S522      | 0.1117417   | 4   | 2   | 0   | 0  | 0  | 2  | 0  | 2 Proteasome activator complex subunit 4 OS-Mus musculus GN-Pamc4 PE=1 SV=1                                                           |
| G3XAA8      | 0.252653903 | 4   | 3   | 7   | 0  | 2  | 0  | 0  | 0 Isopentenyl-diphosphate Delta-isomerase 1 OS-Mus musculus GN-Idi1 PE=1 SV=1                                                         |
| P58044      | 0.252653903 | 4   | 3   | 7   | 0  | 2  | 0  | 0  | 2 Isopentenyl-diphosphate Delta-isomerase 1 OS-Mus musculus GN-Idi1 PE=1 SV=1                                                         |
| P46471      | 0.007441821 | 61  | 56  | 49  | 21 | 18 | 21 | 21 | 20 26S protease regulatory subunit 7 OS-Mus musculus GN-Pamc2 PE=1 SV=5                                                               |



|            |             |     |    |    |    |    |    |    |                                                                                                        |
|------------|-------------|-----|----|----|----|----|----|----|--------------------------------------------------------------------------------------------------------|
| Q9CQR6     | 0.306365382 | 8   | 12 | 23 | 0  | 5  | 6  | 0  | 5 Serine/threonine-protein phosphatase 6 catalytic subunit OS=Mus musculus GN=Ppp6c PE=1 SV=1          |
| O9YMR6     | 0.019432689 | 9   | 16 | 3  | 5  | 2  | 4  | 3  | 4 Serratia RNA effector molecule homolog OS=Mus musculus GN=Srrt PE=1 SV=1                             |
| OS1412     | 0.075251108 | 20  | 13 | 21 | 3  | 1  | 5  | 2  | 11 60S ribosomal protein L33a OS=Mus musculus GN=Rpl35a PE=1 SV=2                                      |
| P09405     | 0.096950615 | 12  | 10 | 5  | 2  | 2  | 0  | 0  | 2 Nucleolin OS=Mus musculus GN=Ncl PE=1 SV=2                                                           |
| P32067     | 0.266853412 | 8   | 8  | 15 | 0  | 5  | 2  | 4  | 4 Lupus La protein homolog OS=Mus musculus GN=Sab PE=1 SV=1                                            |
| D32Z77     | 0.87962937  | 23  | 0  | 0  | 0  | 10 | 8  | 0  | 7 Actin-related protein 2/3 complex subunit 3 OS=Mus musculus GN=Arp3 PE=1 SV=1                        |
| AA01BQG0W6 | 0.729234395 | 0   | 0  | 0  | 9  | 0  | 5  | 2  | 3 60S ribosomal protein L13a (Fragment) OS=Mus musculus GN=Rpl13a PE=4 SV=1                            |
| Q9JKR1     | 0.409319681 | 0   | 6  | 8  | 3  | 3  | 0  | 0  | 2 Ubiquitin carboxyl-terminal hydrolase isozyme L3 OS=Mus musculus GN=Uhd3l3 PE=1 SV=2                 |
| PFQ7S1     | 0.001498412 | 15  | 6  | 10 | 3  | 3  | 0  | 0  | 2 Nucleolin OS=Mus musculus GN=Ncl PE=1 SV=2                                                           |
| Q61207     | 0.068796628 | 6   | 5  | 6  | 0  | 0  | 0  | 2  | 0 Prospodin OS=Mus musculus GN=Psp PE=1 SV=2                                                           |
| E9FZD0     | 0.068796628 | 6   | 5  | 6  | 0  | 0  | 0  | 2  | 0 Prospodin OS=Mus musculus GN=Psp PE=1 SV=2                                                           |
| Q8BBQ1     | 0.068796628 | 6   | 5  | 6  | 0  | 0  | 0  | 2  | 0 Prospodin OS=Mus musculus GN=Psp PE=1 SV=2                                                           |
| J3QP65     | 0.068796628 | 6   | 5  | 6  | 0  | 0  | 0  | 2  | 0 Prospodin OS=Mus musculus GN=Psp PE=1 SV=2                                                           |
| K3W4L3     | 0.068796628 | 6   | 5  | 6  | 0  | 0  | 0  | 2  | 0 Prospodin OS=Mus musculus GN=Psp PE=1 SV=2                                                           |
| D52780     | 0.097574647 | 6   | 7  | 4  | 0  | 2  | 0  | 0  | 0 Translation initiation factor eIF-2B subunit delta OS=Mus musculus GN=EIF2B4 PE=1 SV=1               |
| Q61749     | 0.097574647 | 6   | 7  | 4  | 0  | 2  | 0  | 0  | 0 Translation initiation factor eIF-2B subunit delta OS=Mus musculus GN=EIF2B4 PE=1 SV=2               |
| Q924C1     | 0.016776926 | 14  | 13 | 11 | 2  | 0  | 4  | 0  | 3 Exportin-5 OS=Mus musculus GN=Xpo5 PE=1 SV=1                                                         |
| P62317     | 0.003005497 | 10  | 8  | 8  | 3  | 0  | 0  | 2  | 3 Small nuclear ribonucleoprotein Sm D2 OS=Mus musculus GN=Snrdp2 PE=1 SV=1                            |
| Q920B9     | 0.007792413 | 12  | 6  | 12 | 5  | 3  | 0  | 0  | 3 FACT complex subunit SPT16 OS=Mus musculus GN=Spt16 PE=1 SV=2                                        |
| G339V6     | 0.007792413 | 12  | 6  | 12 | 5  | 3  | 0  | 0  | 3 FACT complex subunit SPT16 OS=Mus musculus GN=Spt16 PE=1 SV=1                                        |
| Q99L27     | 0.008129763 | 19  | 10 | 12 | 6  | 0  | 4  | 0  | 4 GMP reductase 2 OS=Mus musculus GN=Gmp2 PE=1 SV=2                                                    |
| P13439     | 0.070919551 | 41  | 24 | 33 | 3  | 9  | 9  | 5  | 11 Uridine 5'-monophosphate synthase OS=Mus musculus GN=Umps PE=1 SV=3                                 |
| Q922B2     | 0.002549883 | 112 | 68 | 91 | 31 | 29 | 31 | 18 | 23 Aspartate--RNA ligase, cytoplasmic OS=Mus musculus GN=Dars PE=1 SV=2                                |
| Q8C348     | 0.016750669 | 13  | 6  | 6  | 3  | 2  | 0  | 0  | 0 Structural maintenance of chromosomes protein 2 OS=Mus musculus GN=Smc2 PE=1 SV=2                    |
| O9JKV0     | 0.10212985  | 5   | 5  | 8  | 0  | 2  | 0  | 0  | 0 Cell differentiation protein RCD1 homolog OS=Mus musculus GN=Rcd1 PE=1 SV=1                          |
| Q6PDQ2     | 0.152860787 | 6   | 4  | 8  | 0  | 0  | 0  | 0  | 2 Chromodomain-helicase-DNA-binding protein 4 OS=Mus musculus GN=Chd4 PE=1 SV=1                        |
| E9QA55     | 0.152860787 | 6   | 4  | 8  | 0  | 0  | 0  | 0  | 2 Chromodomain-helicase-DNA-binding protein 4 OS=Mus musculus GN=Chd4 PE=1 SV=1                        |
| E9QA54     | 0.152860787 | 6   | 4  | 8  | 0  | 0  | 0  | 0  | 2 Chromodomain-helicase-DNA-binding protein 4 OS=Mus musculus GN=Chd4 PE=1 SV=1                        |
| OS5222     | 0.237766181 | 7   | 7  | 10 | 0  | 3  | 3  | 2  | 4 Integrin-linked protein kinase OS=Mus musculus GN=Ilk PE=1 SV=2                                      |
| JGQNW0     | 0.008512109 | 57  | 46 | 40 | 12 | 8  | 13 | 11 | 19 DNA (cytosine-5)-methyltransferase OS=Mus musculus GN=Dnmt1 PE=1 SV=1                               |
| P13664     | 0.008512109 | 57  | 46 | 40 | 12 | 8  | 13 | 11 | 19 DNA (cytosine-5)-methyltransferase 1 OS=Mus musculus GN=Dnmt1 PE=1 SV=5                             |
| Q99PW0     | 0.073956804 | 25  | 10 | 10 | 6  | 0  | 0  | 0  | 3 RNA processing-splicing factor 8 OS=Mus musculus GN=Ppp7f PE=1 SV=2                                  |
| T27048     | 0.217277225 | 13  | 14 | 10 | 0  | 4  | 0  | 5  | 3 Small nuclear ribonucleoprotein-associated protein B OS=Mus musculus GN=Snrpb PE=1 SV=1              |
| P63163     | 0.217277225 | 13  | 14 | 10 | 0  | 4  | 0  | 5  | 3 Small nuclear ribonucleoprotein-associated protein N OS=Mus musculus GN=Snrpn PE=1 SV=1              |
| O9R190     | 0.020434511 | 24  | 14 | 10 | 5  | 3  | 4  | 3  | 7 Metastasis-associated protein MTAA2 OS=Mus musculus GN=Mta2 PE=1 SV=1                                |
| Q9WJ60     | 0.451027464 | 0   | 11 | 8  | 0  | 3  | 2  | 0  | 4 Glycogen synthase kinase-3 beta OS=Mus musculus GN=Gsk3b PE=1 SV=2                                   |
| E9QAQ5     | 0.451027464 | 0   | 11 | 8  | 0  | 3  | 2  | 0  | 4 Glycogen synthase kinase-3 beta OS=Mus musculus GN=Gsk3b PE=1 SV=1                                   |
| Q9WTL7     | 0.272491409 | 0   | 7  | 6  | 0  | 2  | 0  | 0  | 0 Acyl-protein thioesterase 2 OS=Mus musculus GN=Lyp2 PE=1 SV=1                                        |
| D6R1R7     | 0.698960769 | 0   | 0  | 13 | 0  | 0  | 0  | 0  | 4 Lupus La protein homolog OS=Mus musculus GN=Sab PE=1 SV=1                                            |
| Q9EPL8     | 0.002798021 | 18  | 16 | 18 | 8  | 0  | 5  | 0  | 4 Importin-7 OS=Mus musculus GN=Ipf7 PE=1 SV=2                                                         |
| Q9EQL5     | 0.161092723 | 19  | 12 | 14 | 0  | 6  | 3  | 5  | 4 Protein SET OS=Mus musculus GN=Set PE=1 SV=1                                                         |
| A2BE93     | 0.161092723 | 19  | 12 | 14 | 0  | 6  | 3  | 5  | 4 Protein SET (Fragment) OS=Mus musculus GN=Set PE=1 SV=1                                              |
| P01901     | 0.18875138  | 22  | 18 | 14 | 0  | 5  | 3  | 0  | 8 H-2 class I histocompatibility antigen, K-B alpha chain OS=Mus musculus GN=H2-K1 PE=1 SV=1           |
| P97760     | 0.012552643 | 10  | 8  | 14 | 3  | 2  | 0  | 0  | 3 DNA-directed RNA polymerase II subunit RPB3 OS=Mus musculus GN=Polr2c PE=1 SV=2                      |
| AA04SDRML8 | 0.012552643 | 10  | 8  | 14 | 3  | 2  | 0  | 0  | 3 DNA-directed RNA polymerase II subunit RPB3 OS=Mus musculus GN=Polr2c PE=1 SV=1                      |
| E9PWG6     | 0.036139122 | 9   | 8  | 6  | 5  | 0  | 2  | 2  | 2 Protein Ncapg OS=Mus musculus GN=Ncapg PE=1 SV=1                                                     |
| Q4EJZ2     | 0.199489274 | 7   | 11 | 3  | 0  | 0  | 0  | 0  | 2 Importin subunit alpha OS=Mus musculus GN=Kna6 PE=1 SV=1                                             |
| D3Y1L7     | 0.274974961 | 5   | 9  | 4  | 0  | 2  | 0  | 0  | 0 Protein Gm10126 OS=Mus musculus GN=Gm10126 PE=4 SV=2                                                 |
| S4816      | 0.005469855 | 44  | 33 | 42 | 30 | 11 | 0  | 0  | 7 MCM7, isoform CRA_b OS=Mus musculus GN=Dcc2 PE=1 SV=1                                                |
| Q8BT80     | 0.002597577 | 52  | 37 | 45 | 11 | 13 | 9  | 0  | 8 DEAD (Asp-Glu-Ala-Asp) box polypeptide 5 OS=Mus musculus GN=Ddx5 PE=1 SV=1                           |
| OS3345     | 0.189023507 | 8   | 11 | 3  | 0  | 0  | 0  | 0  | 2 Importin subunit alpha-7 OS=Mus musculus GN=Kna6 PE=1 SV=2                                           |
| Q61191     | 0.007280929 | 19  | 9  | 12 | 4  | 2  | 3  | 0  | 4 Host cell factor 1 OS=Mus musculus GN=Hcf1 PE=1 SV=2                                                 |
| E9C2K6     | 0.028208623 | 49  | 39 | 42 | 30 | 11 | 0  | 0  | 10 Adaptor RNA-associated complex protein 1 OS=Mus musculus GN=Smad3 PE=1 SV=1                         |
| BI1AUX2    | 0.007095807 | 19  | 9  | 13 | 4  | 2  | 3  | 0  | 4 Host cell factor 1 OS=Mus musculus GN=Hcf1 PE=1 SV=1                                                 |
| P43247     | 0.025519975 | 14  | 10 | 3  | 3  | 0  | 0  | 0  | 2 DNA mismatch repair protein Msh2 OS=Mus musculus GN=Msh2 PE=1 SV=1                                   |
| Q6SFL6     | 0.003944719 | 56  | 33 | 46 | 11 | 11 | 10 | 5  | 12 Methionine--RNA ligase, cytoplasmic OS=Mus musculus GN=Mars PE=1 SV=1                               |
| E9C0R2     | 0.003944719 | 56  | 33 | 46 | 11 | 11 | 10 | 5  | 12 Methionine--RNA ligase, cytoplasmic OS=Mus musculus GN=Mars PE=1 SV=1                               |
| Q9D1A2     | 0.006544286 | 18  | 10 | 15 | 4  | 0  | 3  | 0  | 3 Cytosolic non-specific dipeptidase OS=Mus musculus GN=Cndp2 PE=1 SV=1                                |
| Q8K4P0     | 0.109934488 | 23  | 20 | 19 | 0  | 0  | 0  | 0  | 5 pre-mRNA 3' end processing protein WDR33 OS=Mus musculus GN=Wdr33 PE=1 SV=1                          |
| P61656     | 0.000690645 | 52  | 37 | 45 | 11 | 13 | 9  | 5  | 8 Probable ATP-dependent RNA helicase DDX5 OS=Mus musculus GN=Ddx5 PE=1 SV=2                           |
| P46061     | 0.003964336 | 24  | 20 | 13 | 2  | 0  | 2  | 0  | 7 Ran GTPase-activating protein 1 OS=Mus musculus GN=Rangap1 PE=1 SV=2                                 |
| P20664     | 0.150296354 | 11  | 7  | 15 | 0  | 0  | 0  | 0  | 2 DNA primase small subunit OS=Mus musculus GN=Prm1 PE=1 SV=1                                          |
| JGQN19     | 0.150296354 | 11  | 7  | 15 | 0  | 0  | 0  | 0  | 2 DNA primase OS=Mus musculus GN=Prm1 PE=1 SV=1                                                        |
| O9D6Z1     | 0.106670336 | 20  | 14 | 19 | 0  | 0  | 0  | 0  | 4 Nucleolar protein 56 OS=Mus musculus GN=Nop56 PE=1 SV=2                                              |
| E9C2K6     | 0.005893869 | 12  | 16 | 20 | 8  | 0  | 0  | 0  | 3 Structural maintenance of chromosomes protein OS=Mus musculus GN=Smc4 PE=1 SV=1                      |
| Q8CG47     | 0.008593869 | 12  | 16 | 20 | 8  | 0  | 0  | 0  | 3 Structural maintenance of chromosomes protein 4 OS=Mus musculus GN=Smc4 PE=1 SV=1                    |
| P62267     | 0.013122411 | 44  | 34 | 33 | 6  | 9  | 3  | 6  | 7 40S ribosomal protein S23 OS=Mus musculus GN=Rps23 PE=1 SV=3                                         |
| O9D7B2     | 0.07697724  | 8   | 9  | 12 | 0  | 2  | 0  | 2  | 0 LIM and senescent cell antigen-like-containing domain protein OS=Mus musculus GN=Lims1 PE=1 SV=2     |
| P11214     | 0.005178179 | 14  | 9  | 10 | 6  | 0  | 0  | 0  | 2 Tissue-type plasminogen activator OS=Mus musculus GN=Plat PE=1 SV=3                                  |
| P08375     | 0.000138968 | 34  | 31 | 10 | 6  | 0  | 0  | 0  | 7 DNA-directed RNA polymerase II subunit RPB1 OS=Mus musculus GN=Polr2a PE=1 SV=1                      |
| AA0AR4J0V5 | 0.000138968 | 34  | 31 | 29 | 10 | 6  | 6  | 2  | 7 DNA-directed RNA polymerase subunit OS=Mus musculus GN=Polr2a PE=1 SV=1                              |
| P07742     | 0.027021016 | 116 | 75 | 78 | 11 | 10 | 14 | 0  | 18 Ribonucleoside-diphosphate reductase large subunit OS=Mus musculus GN=Rrm1 PE=1 SV=2                |
| Q9WJ64     | 0.06981691  | 9   | 9  | 12 | 0  | 2  | 0  | 0  | 2 LIM and senescent cell antigen-like-containing domain protein 1 OS=Mus musculus GN=Lims1 PE=1 SV=3   |
| E9C9P2     | 0.06981691  | 9   | 9  | 12 | 0  | 2  | 0  | 0  | 2 LIM and senescent cell antigen-like-containing domain protein OS=Mus musculus GN=Lims1 PE=1 SV=1     |
| AA0AR4J0S5 | 0.06981691  | 9   | 9  | 12 | 0  | 2  | 0  | 0  | 2 LIM and senescent cell antigen-like-containing domain protein OS=Mus musculus GN=Lims1 PE=1 SV=1     |
| P46664     | 0.007528771 | 18  | 15 | 21 | 8  | 2  | 5  | 3  | 2 Adenylosuccinyl synthetase isozyme 2 OS=Mus musculus GN=Adss PE=1 SV=2                               |
| Q9CZU3     | 0.001495783 | 16  | 16 | 21 | 7  | 0  | 3  | 3  | 2 Superficial viral-like activity 2-like 2 OS=Mus musculus GN=Skiv2l2 PE=1 SV=1                        |
| P35510     | 0.018540013 | 19  | 21 | 18 | 2  | 2  | 0  | 0  | 2 RNA 2'-O-methyltransferase fibrillarin OS=Mus musculus GN=Pf1 PE=1 SV=1                              |
| F6TVP2     | 0.125122415 | 30  | 28 | 0  | 3  | 2  | 3  | 0  | 4 Deoxy nucleoside triphosphate triphosphorylase SAMHD1 (Fragment) OS=Mus musculus GN=Samhd1 PE=1 SV=1 |
| O9R0B9     | 0.014968399 | 20  | 20 | 29 | 4  | 0  | 3  | 0  | 3 Procollagen-lysine-2-oxoglutarate 5-dioxygenase 2 OS=Mus musculus GN=Ploa2 PE=1 SV=2                 |
| Q60718     | 0.014968399 | 20  | 20 | 29 | 4  | 0  | 3  | 0  | 3 Procollagen-lysine-2-oxoglutarate 5-dioxygenase 2 OS=Mus musculus GN=Ploa2 PE=1 SV=1                 |
| Q9C0K6     | 0.026470023 | 17  | 28 | 14 | 2  | 2  | 3  | 0  | 4 Deoxy nucleoside triphosphate triphosphorylase SAMHD1 OS=Mus musculus GN=Samhd1 PE=1 SV=1            |
| Q60710     | 0.026988023 | 30  | 28 | 27 | 3  | 2  | 3  | 0  | 4 Deoxy nucleoside triphosphate triphosphorylase SAMHD1 OS=Mus musculus GN=Samhd1 PE=1 SV=2            |
| F8WJEO     | 0.026988023 | 30  | 28 | 27 | 3  | 2  | 3  | 0  | 4 Deoxy nucleoside triphosphate triphosphorylase SAMHD1 OS=Mus musculus GN=Samhd1 PE=1 SV=1            |
| Q9T133     | 0.061147267 | 16  | 14 | 14 | 0  | 2  | 0  | 0  | 0 Histone H11 OS=Mus musculus GN=Hist11 PE=1 SV=4                                                      |
| Q9EPR7     | 0.064804651 | 17  | 17 | 16 | 0  | 0  | 0  | 0  | 0 Exportin-7 OS=Mus musculus GN=Xpo7 PE=1 SV=2                                                         |
| E9PUW7     | 0.064804651 | 17  | 17 | 16 | 0  | 0  | 0  | 0  | 2 Exportin-7 OS=Mus musculus GN=Xpo7 PE=1 SV=1                                                         |
| Q8CIA5     | 0.002128014 | 67  | 37 | 57 | 13 | 5  | 3  | 2  | 0 Thimet oligopeptidase OS=Mus musculus GN=Thop1 PE=1 SV=1                                             |
| AA0AR4IZY0 | 0.002128014 | 67  | 37 | 57 | 13 | 5  | 3  | 2  | 0 Thimet oligopeptidase OS=Mus musculus GN=Thop1 PE=1 SV=1                                             |
| P43277     | 0.002189191 | 16  | 24 | 13 | 2  | 3  | 0  | 0  | 3 Histone H1.4 OS=Mus musculus GN=Hist14 PE=1 SV=2                                                     |
| P15864     | 0.002618916 | 36  | 24 | 33 | 13 | 2  | 2  | 0  | 0 Histone H1.4 OS=Mus musculus GN=Hist14 PE=1 SV=1                                                     |
| P43274     | 0.000555097 | 42  | 25 | 30 | 11 | 2  | 2  | 0  | 0 Histone H1.4 OS=Mus musculus GN=Hist14 PE=1 SV=2                                                     |
| O9CSH3     | 0.001427414 | 40  | 33 | 49 | 12 | 0  | 0  | 0  | 2 Exosome complex exonuclease RRP4 OS=Mus musculus GN=Dix3 PE=1 SV=4                                   |
| Q9SDV1     | 0.000204161 | 24  | 24 | 20 | 7  | 0  | 0  | 0  | 0 Adaptor protein complex subunit 9 OS=Mus musculus GN=Pack9 PE=1 SV=1                                 |
| AA01BQGR11 | 0.000311532 | 24  | 23 | 22 | 7  | 0  | 0  | 0  | 0 Transaldolase OS=Mus musculus GN=Taldo1 PE=1 SV=1                                                    |
| Q93092     | 0.000311532 | 24  | 23 | 22 | 7  | 0  | 0  | 0  | 0 Transaldolase OS=Mus musculus GN=Taldo1 PE=1 SV=2                                                    |
| O9CYN9     | 0.000418234 | 17  | 15 | 18 | 6  | 0  | 0  | 0  | 0 Renin receptor OS=Mus musculus GN=Ap6ap2 PE=1 SV=2                                                   |
| Q8W065     | 0.000794888 | 15  | 10 | 13 | 5  | 0  | 0  | 0  | 0 Protoproin convertase subtilisin/kexin type 9 OS=Mus musculus GN=Psk9 PE=1 SV=2                      |
| P37040     | 0.000921255 | 24  | 19 | 24 | 7  | 0  | 0  | 0  | 0 NADPH--cytochrome P450 reductase OS=Mus musculus GN=Pcr PE=1 SV=2                                    |
| Q01320     | 0.001023873 | 63  | 49 | 49 | 22 | 0  | 0  | 0  | 0 DNA topoisomerase 2-alpha OS=Mus musculus GN=Top2a PE=1 SV=1                                         |
| O99P88     | 0.001046718 | 8   | 7  | 7  | 3  | 0  | 0  | 0  | 0 Nuclear pore complex protein Nup155 OS=Mus musculus GN=Nup155 PE=1 SV=1                              |
| Q9CZV5     | 0.001224913 | 5   | 5  | 6  | 2  | 0  | 0  | 0  | 0 Histone deacetylase 6 OS=Mus musculus GN=Hda6 PE=1 SV=1                                              |
| AA01BQGX25 | 0.001224913 | 5   | 5  | 6  | 2  | 0  | 0  | 0  | 0 Histone deacetylase 6 (Fragment) OS=Mus musculus GN=Hda6 PE=1 SV=1                                   |
| K81086     | 0.001268145 | 5   | 5  | 5  | 2  | 0  | 0  | 0  | 0 Rabankyrin-5 OS=Mus musculus GN=Arkf1 PE=1 SV=2                                                      |
| Q9Z1T1     | 0.001433046 | 9   | 7  | 11 | 3  | 0  | 0  | 0  | 0 AP-3 complex subunit beta-1 OS=Mus musculus GN=Ap3b1 PE=1 SV=2                                       |
| P19001     | 0.001570323 | 16  | 10 | 17 | 4  | 0  | 0  | 0  | 0 Keratin, type I cytoskeletal 19 OS=Mus musculus GN=Krc19 PE=1 SV=1                                   |
| F8VPK5     | 0.001956166 | 11  | 9  | 8  | 2  | 0  | 0  | 0  | 0 Rho-associated protein kinase OS=Mus musculus GN=Rok2 PE=1 SV=1                                      |
| Q61001     | 0.002109615 | 56  | 33 | 39 | 18 | 0  | 0  | 0  | 0 Laminin subunit alpha-5 OS=Mus musculus GN=Lama5 PE=1 SV=4                                           |
| OS3566     | 0.00294824  | 44  | 44 | 61 | 13 | 0  | 0  | 0  | 0 CD151 antigen OS=Mus musculus GN=Cd151 PE=1 SV=2                                                     |
| AA01BQGRG3 | 0.002121584 | 41  | 42 | 59 | 13 | 0  | 0  | 0  | 0 CD151 antigen (Fragment) OS=Mus musculus GN=Cd151 PE=1 SV=1                                          |
| Q8R480     | 0.003171181 | 6   | 4  | 8  | 2  | 0  | 0  | 0  | 0 Nuclear pore complex protein Nup85 OS=Mus musculus GN=Nup85 PE=1 SV=1                                |
| A2A405     | 0.003781076 | 3   | 3  | 5  | 2  | 0  | 0  | 0  | 0 FACT complex subunit SRP1 (Fragment) OS=Mus musculus GN=Srp1 PE=1 SV=1                               |
| Q08943     | 0.003781076 | 3   | 3  | 5  | 2  | 0  | 0  | 0  | 0 FACT complex subunit SRP1 OS=Mus musculus GN=Srp1 PE=1 SV=2                                          |
| P58854     | 0.004033403 | 4   | 5  | 6  | 0  | 0  | 0  | 0  | 0 Gamma-tubulin complex component 3 OS=Mus musculus GN=Tuvgp3 PE=1 SV=2                                |
| Q6PFD8     | 0.004175839 | 7   | 7  | 17 | 3  | 0  | 0  | 0  | 0 Structural maintenance of chromosomes protein 1 OS=Mus musculus GN=Smcd4 PE=1 SV=1                   |
| Q9JHK4     | 0.004441765 | 10  | 8  | 7  | 4  | 0  | 0  | 0  | 0 Geranylgeranyl transferase type-2 subunit alpha OS=Mus musculus GN=Rabgga PE=1 SV=1                  |
| AA0AR4J233 | 0.005084388 | 8   | 8  | 13 | 3  | 0  | 0  | 0  | 0 Septin-10 OS=Mus musculus GN=Sept10 PE=1 SV=1                                                        |
| Q8C650     | 0.005084388 | 8   | 8  | 13 |    |    |    |    |                                                                                                        |

|                     |              |    |    |    |   |   |   |   |                                                                                                                    |
|---------------------|--------------|----|----|----|---|---|---|---|--------------------------------------------------------------------------------------------------------------------|
| O88792              | 0.058501493  | 4  | 3  | 3  | 0 | 0 | 0 | 0 | Junctional adhesion molecule A OS-Mus musculus GN=F11r PE=1 SV=2                                                   |
| A2RHT5              | 0.058501493  | 4  | 3  | 3  | 0 | 0 | 0 | 0 | Lecithin C4 acyltransferase 1 OS-Mus musculus GN=Lem1 PE=1 SV=1                                                    |
| A0A0U1RFN2          | 0.058501493  | 4  | 3  | 3  | 0 | 0 | 0 | 0 | Protein Lem1 OS-Mus musculus GN=Lem1 PE=1 SV=1                                                                     |
| Q6PAV2              | 0.059002466  | 7  | 5  | 5  | 0 | 0 | 0 | 0 | Probable E3 ubiquitin-protein ligase HERC4 OS-Mus musculus GN=Her4 PE=1 SV=2                                       |
| P17563              | 0.059095581  | 15 | 13 | 15 | 0 | 0 | 0 | 0 | Selenium-binding protein 1 OS-Mus musculus GN=Selbnp1 PE=1 SV=2                                                    |
| Q921D0              | 0.059504973  | 4  | 3  | 4  | 0 | 0 | 0 | 0 | Annexin OS-Mus musculus GN=Anxa8 PE=1 SV=1                                                                         |
| Q92321              | 0.059504973  | 4  | 3  | 4  | 0 | 0 | 0 | 0 | DNA topoisomerase 3-beta-1 OS-Mus musculus GN=Top3b PE=1 SV=1                                                      |
| Q8BFV2              | 0.060063403  | 5  | 3  | 4  | 0 | 0 | 0 | 0 | PCI domain-containing protein 2 OS-Mus musculus GN=PC2 PE=1 SV=1                                                   |
| Q8DY81              | 0.060063403  | 5  | 3  | 4  | 0 | 0 | 0 | 0 | Zinc phosphodiesterase ELAC protein 2 OS-Mus musculus GN=Elac2 PE=1 SV=1                                           |
| BIATP7              | 0.060063403  | 5  | 3  | 4  | 0 | 0 | 0 | 0 | Zinc phosphodiesterase ELAC protein 2 OS-Mus musculus GN=Elac2 PE=1 SV=1                                           |
| Q3UK77              | 0.060118731  | 9  | 7  | 0  | 2 | 0 | 0 | 0 | WD40 repeat-containing protein SMU1 OS-Mus musculus GN=Smu1 PE=2 SV=2                                              |
| G3LW88              | 0.060491654  | 2  | 1  | 0  | 2 | 5 | 0 | 0 | Ubiquitin carboxyl-terminal hydrolase 7 (Fragment) OS-Mus musculus GN=Lisp7 PE=1 SV=1                              |
| Q63836              | 0.060537538  | 14 | 13 | 15 | 0 | 0 | 0 | 0 | Selenium-binding protein 2 OS-Mus musculus GN=Selbnp2 PE=1 SV=2                                                    |
| Q64511              | 0.060601494  | 10 | 9  | 8  | 0 | 0 | 0 | 0 | DNA topoisomerase 2-beta OS-Mus musculus GN=Top2b PE=1 SV=2                                                        |
| F9P961              | 0.060871826  | 15 | 9  | 13 | 0 | 0 | 0 | 0 | Collagen alpha-1(XVII) chain OS-Mus musculus GN=Col18a1 PE=1 SV=4                                                  |
| Q9QPK1              | 0.061071315  | 12 | 4  | 10 | 0 | 0 | 0 | 0 | Collagen alpha-1(XVII) chain OS-Mus musculus GN=Col18a1 PE=1 SV=4                                                  |
| Q9CXK8              | 0.061273139  | 7  | 4  | 5  | 0 | 0 | 0 | 0 | 60S ribosome subunit biogenesis protein N17 homolog OS-Mus musculus GN=N17 PE=1 chain=1                            |
| D3YU58              | 0.061273139  | 7  | 4  | 5  | 0 | 0 | 0 | 0 | Anaphase-promoting complex subunit 7 OS-Mus musculus GN=Anap7 PE=1 SV=1                                            |
| Q9YWM3              | 0.061273139  | 7  | 4  | 5  | 0 | 0 | 0 | 0 | Anaphase-promoting complex subunit 7 OS-Mus musculus GN=Anap7 PE=1 SV=1                                            |
| Q08663              | 0.061340757  | 5  | 5  | 5  | 0 | 0 | 0 | 0 | Methionine aminopeptidase 2 OS-Mus musculus GN=Metap2 PE=1 SV=1                                                    |
| HKV04               | 0.061340757  | 5  | 5  | 5  | 0 | 0 | 0 | 0 | Mini-chromosome maintenance complex-binding protein OS-Mus musculus GN=Mcmcb PE=1 SV=1                             |
| Q3UI33              | 0.061340757  | 5  | 5  | 5  | 0 | 0 | 0 | 0 | Methionine aminopeptidase 2 OS-Mus musculus GN=Metap2 PE=1 SV=1                                                    |
| Q3TMM1              | 0.061340757  | 5  | 5  | 5  | 0 | 0 | 0 | 0 | Methionine aminopeptidase 2 OS-Mus musculus GN=Metap2 PE=1 SV=1                                                    |
| Q54692              | 0.061340757  | 3  | 3  | 3  | 0 | 0 | 0 | 0 | Centromeric kinetochore protein 2 OS-Mus musculus GN=Ck2 PE=1 SV=3                                                 |
| Q8VDP4              | 0.061340757  | 3  | 3  | 3  | 0 | 0 | 0 | 0 | Cell cycle and apoptosis regulator protein 2 OS-Mus musculus GN=Ccar2 PE=1 SV=2                                    |
| Q8QVY3              | 0.061340757  | 2  | 2  | 2  | 0 | 0 | 0 | 0 | Transformation/transcription domain-associated protein OS-Mus musculus GN=Trap PE=1 SV=2                           |
| Q8CYG3              | 0.061340757  | 8  | 8  | 8  | 0 | 0 | 0 | 0 | LUDP-N-acetylglycosamine--peptide N-acetylglycosaminyltransferase 110 kDa subunit OS-Mus musculus GN=Ogt PE=1 SV=2 |
| Q92D39              | 0.061488652  | 10 | 15 | 20 | 0 | 0 | 0 | 0 | Heat shock type 2-1 OS-Mus musculus GN=Hsp21 PE=1 SV=3                                                             |
| Q8BM72              | 0.06157035   | 4  | 4  | 6  | 0 | 0 | 0 | 0 | Heat shock 70 kDa protein 13 OS-Mus musculus GN=Hspa13 PE=1 SV=1                                                   |
| Q8R3C0              | 0.061984728  | 9  | 9  | 10 | 0 | 0 | 0 | 0 | Mini-chromosome maintenance complex-binding protein OS-Mus musculus GN=Mcmcb PE=1 SV=1                             |
| A0A0R4J190          | 0.062049877  | 8  | 5  | 5  | 0 | 0 | 0 | 0 | ADP-ribosyl cyclase/cyclic ADP-ribose hydrolase 2 OS-Mus musculus GN=Abt1 PE=1 SV=1                                |
| Q3TH01              | 0.0623884307 | 22 | 18 | 14 | 0 | 0 | 0 | 0 | H-2 class I histocompatibility antigen, K alpha chain OS-Mus musculus GN=H2-K1 PE=1 SV=1                           |
| P33610              | 0.064497923  | 4  | 4  | 5  | 0 | 0 | 0 | 0 | DNA primase large subunit OS-Mus musculus GN=Prm2 PE=1 SV=1                                                        |
| E9QSE2              | 0.064539319  | 5  | 3  | 5  | 0 | 0 | 0 | 0 | Protein BC005561 OS-Mus musculus GN=BC005561 PE=1 SV=1                                                             |
| Q61738              | 0.06460263   | 5  | 4  | 6  | 0 | 0 | 0 | 0 | Integrin alpha-7 OS-Mus musculus GN=Itga7 PE=1 SV=3                                                                |
| P33609              | 0.065027744  | 4  | 4  | 3  | 0 | 0 | 0 | 0 | DNA polymerase alpha catalytic subunit OS-Mus musculus GN=Pola1 PE=1 SV=2                                          |
| P97377              | 0.065122296  | 10 | 5  | 7  | 0 | 0 | 0 | 0 | Cyclin-dependent kinase 2 OS-Mus musculus GN=Cdk2 PE=1 SV=2                                                        |
| Q8R5F3              | 0.065209612  | 8  | 9  | 0  | 0 | 0 | 0 | 0 | O-acetyl-ADP-ribose deacetylase 1 OS-Mus musculus GN=Oard1 PE=1 SV=2                                               |
| A0A0U1RPE7          | 0.065348584  | 5  | 4  | 3  | 0 | 0 | 0 | 0 | Hsp70-binding protein 1 (Fragment) OS-Mus musculus GN=Hspb1 PE=1 SV=1                                              |
| A0A0U1RPF2          | 0.065348584  | 5  | 4  | 3  | 0 | 0 | 0 | 0 | Hsp70-binding protein 1 (Fragment) OS-Mus musculus GN=Hspb1 PE=1 SV=1                                              |
| Q9Q93               | 0.065348584  | 5  | 4  | 3  | 0 | 0 | 0 | 0 | Hsp70-binding protein 1 OS-Mus musculus GN=Hspb1 PE=1 SV=1                                                         |
| Q35640              | 0.065540635  | 6  | 3  | 4  | 0 | 0 | 0 | 0 | Annexin A8 OS-Mus musculus GN=Anxa8 PE=1 SV=2                                                                      |
| Q810D6              | 0.066088509  | 6  | 3  | 5  | 0 | 0 | 0 | 0 | Glutamine-rich WD repeat-containing protein 1 OS-Mus musculus GN=Gwd1 PE=1 SV=2                                    |
| E9Q906              | 0.066284035  | 0  | 5  | 4  | 2 | 0 | 0 | 0 | Catein delta-1 OS-Mus musculus GN=Ctnnd1 PE=1 SV=1                                                                 |
| Q8X203              | 0.067282054  | 0  | 5  | 4  | 2 | 0 | 0 | 0 | Cytochrome c-hydroxylase (labroninomat) OS-Mus musculus GN=Cydh PE=1 SV=1                                          |
| Q8BGZ4              | 0.067758005  | 7  | 7  | 5  | 0 | 0 | 0 | 0 | Cell division cycle protein 23 homolog OS-Mus musculus GN=Cdc23 PE=1 SV=2                                          |
| A0A0R4J1W7          | 0.067758005  | 7  | 7  | 5  | 0 | 0 | 0 | 0 | CDC23 (Cell division cycle 23, yeast, homolog), isoform CRA_c OS-Mus musculus GN=Cdc23 PE=1 SV=1                   |
| G3XW7               | 0.067758005  | 7  | 7  | 5  | 0 | 0 | 0 | 0 | CDC23 (Cell division cycle 23, yeast, homolog), isoform CRA_c OS-Mus musculus GN=Cdc23 PE=1 SV=1                   |
| Q9XK78              | 0.068235596  | 10 | 6  | 10 | 0 | 0 | 0 | 0 | Expirin-T OS-Mus musculus GN=XpT PE=1 SV=3                                                                         |
| Q2NL51              | 0.068476125  | 5  | 6  | 5  | 0 | 0 | 0 | 0 | Glycogen synthase kinase-3 alpha OS-Mus musculus GN=Gsk3a PE=1 SV=2                                                |
| A0A0R4J006          | 0.068778285  | 0  | 4  | 4  | 2 | 0 | 0 | 0 | Na(+)/H(+) exchange regulatory cofactor NHE-RF2 OS-Mus musculus GN=Slc9a3r2 PE=1 SV=1                              |
| P29351              | 0.06894342   | 4  | 5  | 5  | 0 | 0 | 0 | 0 | Tyrosine-protein phosphatase non-receptor type 6 OS-Mus musculus GN=Ptpn6 PE=1 SV=2                                |
| Q910A2              | 0.069541267  | 8  | 5  | 8  | 0 | 0 | 0 | 0 | Kelch-like protein 2 OS-Mus musculus GN=Khlh2 PE=1 SV=1                                                            |
| HKV05               | 0.069541267  | 8  | 5  | 4  | 0 | 0 | 0 | 0 | Kelch-like protein 2 OS-Mus musculus GN=Khlh2 PE=1 SV=1                                                            |
| A0A1B0G5X7          | 0.070340683  | 3  | 3  | 2  | 0 | 0 | 0 | 0 | Nuclear pore complex protein Nup98 OS-Mus musculus GN=Nup98 PE=1 SV=1                                              |
| Q64378              | 0.071671539  | 4  | 5  | 4  | 0 | 0 | 0 | 0 | Peptidyl-prolyl cis-trans isomerase FKBP5 OS-Mus musculus GN=FKBP5 PE=1 SV=1                                       |
| A0A1B0G8R8          | 0.071671539  | 4  | 5  | 4  | 0 | 0 | 0 | 0 | Gamma-tubulin complex component (Fragment) OS-Mus musculus GN=Tubgp2 PE=1 SV=1                                     |
| Q921G8              | 0.071671539  | 4  | 5  | 4  | 0 | 0 | 0 | 0 | Gamma-tubulin complex component 2 OS-Mus musculus GN=Tubgp2 PE=1 SV=2                                              |
| A0A087WNS9          | 0.07199381   | 6  | 8  | 7  | 0 | 0 | 0 | 0 | Lymphocyte antigen 6E (Fragment) OS-Mus musculus GN=Lyc6 PE=1 SV=6                                                 |
| P14602              | 0.072226329  | 18 | 14 | 9  | 0 | 0 | 0 | 0 | Heat shock protein beta-1 OS-Mus musculus GN=Hspb1 PE=1 SV=3                                                       |
| contaminant_TRYPSIN | 0.072429565  | 4  | 4  | 6  | 0 | 0 | 0 | 0 | no description                                                                                                     |
| Q505N6              | 0.072671706  | 9  | 4  | 8  | 0 | 0 | 0 | 0 | Ribosomal protein S6 kinase OS-Mus musculus GN=Rpsk61 PE=1 SV=1                                                    |
| F6Q8A4              | 0.072671706  | 9  | 4  | 8  | 0 | 0 | 0 | 0 | Ribosomal protein S6 kinase alpha-1 (Fragment) OS-Mus musculus GN=Rpsk61 PE=1 SV=1                                 |
| E9PWV3              | 0.072671706  | 9  | 4  | 8  | 0 | 0 | 0 | 0 | Ribosomal protein S6 kinase OS-Mus musculus GN=Rpsk61 PE=1 SV=1                                                    |
| F6Q8A2              | 0.072671706  | 9  | 4  | 8  | 0 | 0 | 0 | 0 | Ribosomal protein S6 kinase OS-Mus musculus GN=Rpsk61 PE=1 SV=1                                                    |
| P18653              | 0.072671706  | 9  | 4  | 8  | 0 | 0 | 0 | 0 | Ribosomal protein S6 kinase alpha-1 OS-Mus musculus GN=Rpsk61 PE=1 SV=1                                            |
| G3UZ13              | 0.072671706  | 9  | 4  | 8  | 0 | 0 | 0 | 0 | Ribosomal protein S6 kinase alpha-1 OS-Mus musculus GN=Rpsk61 PE=1 SV=1                                            |
| O09159              | 0.073037536  | 4  | 2  | 2  | 0 | 0 | 0 | 0 | Lysosomal alpha-mannosidase OS-Mus musculus GN=Man2b1 PE=1 SV=4                                                    |
| Q9YWS4              | 0.073037536  | 4  | 2  | 2  | 0 | 0 | 0 | 0 | Acid ceramidase OS-Mus musculus GN=Asah1 PE=1 SV=1                                                                 |
| G3XWQ1              | 0.073224064  | 0  | 3  | 0  | 0 | 0 | 0 | 0 | Integrin alpha-7 OS-Mus musculus GN=Itga7 PE=1 SV=3                                                                |
| Q8R2U0              | 0.073375642  | 7  | 3  | 6  | 0 | 0 | 0 | 0 | Nucleoporin SEH1 OS-Mus musculus GN=Seh1 PE=2 SV=1                                                                 |
| BIAZ16              | 0.073639414  | 5  | 3  | 6  | 0 | 0 | 0 | 0 | THO complex subunit 2 OS-Mus musculus GN=Thoc2 PE=1 SV=1                                                           |
| Q91YF2              | 0.074507005  | 6  | 5  | 3  | 0 | 0 | 0 | 0 | Neurolysin, mitochondrial OS-Mus musculus GN=Nln PE=1 SV=1                                                         |
| PK3887              | 0.074745414  | 5  | 5  | 3  | 0 | 0 | 0 | 0 | Tubulin gamma1 chain OS-Mus musculus GN=Tubg1 PE=1 SV=1                                                            |
| E9PW16              | 0.074889414  | 5  | 5  | 3  | 0 | 0 | 0 | 0 | HEAT repeat-containing protein 3 OS-Mus musculus GN=Heatr3 PE=1 SV=1                                               |
| Q9JIK5              | 0.074907086  | 6  | 8  | 6  | 0 | 0 | 0 | 0 | Nuclear RNA helicase 2 OS-Mus musculus GN=Ddx21 PE=1 SV=3                                                          |
| Q9YWM1              | 0.074907086  | 3  | 4  | 3  | 0 | 0 | 0 | 0 | Rac GTPase-activating protein 1 OS-Mus musculus GN=Racgap1 PE=1 SV=1                                               |
| Q91B86              | 0.074907086  | 3  | 4  | 3  | 0 | 0 | 0 | 0 | Methionine adenosyltransferase 2 subunit beta OS-Mus musculus GN=Metab2b PE=1 SV=1                                 |
| Q8C4B4              | 0.075959594  | 5  | 2  | 3  | 0 | 0 | 0 | 0 | Protein unc-119 homolog B OS-Mus musculus GN=Unc119b PE=1 SV=1                                                     |
| Q3LW53              | 0.07638058   | 10 | 14 | 16 | 0 | 0 | 0 | 0 | Protein Niban OS-Mus musculus GN=Fam129a PE=1 SV=2                                                                 |
| Q91XR9              | 0.0764554    | 3  | 2  | 4  | 0 | 0 | 0 | 0 | Phospholipid hydroperoxide glutathione peroxidase, nuclear OS-Mus musculus GN=Gpx4 PE=1 SV=3                       |
| Q92304              | 0.0764554    | 3  | 2  | 4  | 0 | 0 | 0 | 0 | Heterotrimeric nuclear ribonucleoprotein C1C2 OS-Mus musculus GN=Hnmpc PE=1 SV=1                                   |
| Q9D018              | 0.077041604  | 5  | 3  | 0  | 2 | 0 | 0 | 0 | mRNA turnover protein 4 OS-Mus musculus GN=Mrtm4 PE=1 SV=1                                                         |
| A2AMV1              | 0.077041604  | 5  | 3  | 0  | 2 | 0 | 0 | 0 | RIKEN cDNA 2610012022, isoform CRA_a OS-Mus musculus GN=Mrtm4 PE=1 SV=1                                            |
| Q50U71              | 0.077782126  | 7  | 5  | 3  | 0 | 0 | 0 | 0 | E3 ubiquitin/ISG15 ligase TRIM25 OS-Mus musculus GN=Trim25 PE=1 SV=1                                               |
| Q61510              | 0.077821216  | 5  | 4  | 3  | 0 | 0 | 0 | 0 | E3 ubiquitin/ISG15 ligase TRIM25 OS-Mus musculus GN=Trim25 PE=1 SV=2                                               |
| Q8X298              | 0.078460951  | 5  | 7  | 5  | 0 | 0 | 0 | 0 | Anillin OS-Mus musculus GN=Anln PE=1 SV=2                                                                          |
| P62307              | 0.079333295  | 3  | 3  | 5  | 0 | 0 | 0 | 0 | Small nuclear ribonucleoprotein F OS-Mus musculus GN=Snrfp PE=1 SV=1                                               |
| Q9YJA5              | 0.079374068  | 6  | 9  | 7  | 0 | 0 | 0 | 0 | Lyc6 protein OS-Mus musculus GN=Lyc6 PE=1 SV=1                                                                     |
| A0A087WRZ2          | 0.079374068  | 6  | 9  | 7  | 0 | 0 | 0 | 0 | Lymphocyte antigen 6E (Fragment) OS-Mus musculus GN=Lyc6 PE=1 SV=1                                                 |
| Q64253              | 0.079374068  | 6  | 9  | 7  | 0 | 0 | 0 | 0 | Lymphocyte antigen 6E OS-Mus musculus GN=Lyc6 PE=1 SV=2                                                            |
| A0A087WNT2          | 0.079374068  | 6  | 9  | 7  | 0 | 0 | 0 | 0 | Lymphocyte antigen 6E (Fragment) OS-Mus musculus GN=Lyc6 PE=1 SV=6                                                 |
| A0A087WPP4          | 0.079374068  | 6  | 9  | 7  | 0 | 0 | 0 | 0 | Lymphocyte antigen 6E (Fragment) OS-Mus musculus GN=Lyc6 PE=1 SV=1                                                 |
| A0A087WQ65          | 0.079374068  | 6  | 9  | 7  | 0 | 0 | 0 | 0 | Lymphocyte antigen 6E (Fragment) OS-Mus musculus GN=Lyc6 PE=1 SV=1                                                 |
| Q9YJE5              | 0.080977669  | 4  | 3  | 6  | 0 | 0 | 0 | 0 | Diphosphonucleotase decarboxylase OS-Mus musculus GN=Mvd PE=1 SV=2                                                 |
| Q91W96              | 0.081193273  | 4  | 4  | 3  | 4 | 0 | 0 | 0 | Anaphase-promoting complex subunit 4 OS-Mus musculus GN=Anap4 PE=1 SV=1                                            |
| Q62426              | 0.082748624  | 5  | 0  | 3  | 2 | 0 | 0 | 0 | DNA mismatch repair protein Msh6 OS-Mus musculus GN=Msh6 PE=1 SV=3                                                 |
| Q6A026              | 0.083679833  | 12 | 4  | 8  | 0 | 0 | 0 | 0 | Sister chromatid cohesion protein PDS5 homolog A OS-Mus musculus GN=Pds5a PE=1 SV=3                                |
| E9Q9P5              | 0.083679833  | 12 | 4  | 8  | 0 | 0 | 0 | 0 | Sister chromatid cohesion protein PDS5 homolog A OS-Mus musculus GN=Pds5a PE=1 SV=1                                |
| P59328              | 0.084095285  | 2  | 3  | 2  | 0 | 0 | 0 | 0 | WD repeat and HMG-box DNA-binding protein 1 OS-Mus musculus GN=Wdhd1 PE=1 SV=2                                     |
| A0A0R4J1F8          | 0.084095285  | 2  | 3  | 2  | 0 | 0 | 0 | 0 | WD repeat and HMG-box DNA-binding protein 1 OS-Mus musculus GN=Wdhd1 PE=1 SV=1                                     |
| E9Q9P8              | 0.084095285  | 2  | 3  | 2  | 0 | 0 | 0 | 0 | WD repeat and HMG-box DNA-binding protein 1 OS-Mus musculus GN=Wdhd1 PE=1 SV=1                                     |
| E9Q9M5              | 0.085057279  | 2  | 3  | 2  | 0 | 0 | 0 | 0 | Ubiquitin carboxyl-terminal hydrolase 19 OS-Mus musculus GN=Usp19 PE=1 SV=1                                        |
| JKMM1               | 0.085057279  | 7  | 3  | 3  | 0 | 0 | 0 | 0 | Ubiquitin carboxyl-terminal hydrolase 19 OS-Mus musculus GN=Usp19 PE=1 SV=1                                        |
| A0A0A6YWN9          | 0.085057279  | 7  | 3  | 3  | 0 | 0 | 0 | 0 | Ubiquitin carboxyl-terminal hydrolase 19 (Fragment) OS-Mus musculus GN=Usp19 PE=1 SV=1                             |
| A0A0A6YWX1          | 0.085057279  | 7  | 3  | 3  | 0 | 0 | 0 | 0 | Ubiquitin carboxyl-terminal hydrolase 19 OS-Mus musculus GN=Usp19 PE=1 SV=1                                        |
| Q3LJ86              | 0.085057279  | 7  | 3  | 3  | 0 | 0 | 0 | 0 | Ubiquitin carboxyl-terminal hydrolase 19 OS-Mus musculus GN=Usp19 PE=1 SV=1                                        |
| V9GX06              | 0.086113781  | 2  | 3  | 4  | 0 | 0 | 0 | 0 | Protein Gm1124 (Fragment) OS-Mus musculus GN=Gm1124 PE=1 SV=1                                                      |
| Q9PLE6              | 0.086172937  | 4  | 4  | 9  | 0 | 0 | 0 | 0 | ATP-binding cassette sub-family F member 2 OS-Mus musculus GN=Abcf2 PE=1 SV=1                                      |
| Q8VCT3              | 0.086247576  | 11 | 5  | 13 | 0 | 0 | 0 | 0 | Amino peptidase B OS-Mus musculus GN=Rappc PE=1 SV=2                                                               |
| E9PFE1              | 0.086247576  | 11 | 5  | 13 | 0 | 0 | 0 | 0 | Amino peptidase B OS-Mus musculus GN=Rappc PE=1 SV=1                                                               |
| Q5YD10              | 0.088877496  | 5  | 2  | 4  | 0 | 0 | 0 | 0 | Unconventional myosin-Id OS-Mus musculus GN=Myo1d PE=1 SV=1                                                        |
| Q61805              | 0.092769043  | 6  | 2  | 6  | 0 | 0 | 0 | 0 | Lipopolysaccharide-binding protein OS-Mus musculus GN=Lbp PE=1 SV=2                                                |
| Q64224              | 0.092972088  | 2  | 4  | 4  | 0 | 0 | 0 | 0 | Syntaxin-binding protein 2 OS-Mus musculus GN=Stxbp2 PE=1 SV=1                                                     |
| F3WGM5              | 0.092972088  | 2  | 4  | 4  | 0 | 0 | 0 | 0 | Syntaxin-binding protein 2 (Fragment) OS-Mus musculus GN=Stxbp2 PE=1 SV=1                                          |
| Q07832              | 0.09313315   | 6  | 3  | 2  | 0 | 0 | 0 | 0 | Serine/threonine-protein kinase PLK1 OS-Mus musculus GN=Plk1 PE=1 SV=2                                             |
| Q9YWG5              | 0.093509353  | 3  | 6  | 5  | 0 | 0 | 0 | 0 | Endothelial lipase OS-Mus musculus GN=Lipp PE=2 SV=3                                                               |
| G3X8X0              | 0.093582308  | 7  | 3  | 0  | 0 | 0 | 0 | 0 | DEAH (Asp-Glu-Ala-His) box polypeptide 16, isoform CRA_a OS-Mus musculus GN=Dhx16 PE=1 SV=1                        |
| Q06890              | 0.094230641  | 4  | 16 | 7  | 0 |   |   |   |                                                                                                                    |



|                                |             |   |   |   |   |   |   |   |   |                                                                                                                                               |
|--------------------------------|-------------|---|---|---|---|---|---|---|---|-----------------------------------------------------------------------------------------------------------------------------------------------|
| D3Z729                         | 0.391002219 | 0 | 0 | 4 | 0 | 0 | 0 | 0 | 0 | Eukaryotic translation initiation factor 4E type 2 OS=Mus musculus GN=Eif4c2 PE=1 SV=1                                                        |
| Reverse_trS4R1P5[S4R1P5_MOUSE] | 0.391002219 | 0 | 0 | 2 | 0 | 0 | 0 | 0 | 0 | Dyaonin OS=Mus musculus GN=Dt PE=1 SV=1                                                                                                       |
| D3Z730                         | 0.391002219 | 0 | 0 | 0 | 0 | 0 | 0 | 0 | 0 | Eukaryotic translation initiation factor 4E type 2 OS=Mus musculus GN=Eif4c2 PE=1 SV=1                                                        |
| P42559                         | 0.391002219 | 2 | 0 | 0 | 0 | 0 | 0 | 0 | 0 | Hungatin OS=Mus musculus GN=Hti PE=1 SV=1                                                                                                     |
| Q9Z130                         | 0.391002219 | 4 | 0 | 0 | 0 | 0 | 0 | 0 | 0 | Heterogeneous nuclear ribonucleoprotein D-like OS=Mus musculus GN=Hnrnpd1 PE=1 SV=1                                                           |
| A0A0J9YUF9                     | 0.391002219 | 0 | 0 | 0 | 2 | 0 | 0 | 0 | 0 | Bifunctional polynucleotide phosphatase/kinase (Fragment) OS=Mus musculus GN=Ppk PE=1 SV=1                                                    |
| H3BK47                         | 0.391002219 | 0 | 3 | 0 | 0 | 0 | 0 | 0 | 0 | Neuropilin OS=Mus musculus GN=Npm PE=1 SV=1                                                                                                   |
| Q9UK64                         | 0.391002219 | 0 | 0 | 0 | 0 | 0 | 0 | 0 | 0 | ADP-ribose pyrophosphatase OS=Mus musculus GN=Nud5 PE=1 SV=1                                                                                  |
| Q9DB77                         | 0.391002219 | 2 | 0 | 4 | 0 | 0 | 0 | 0 | 0 | Cytochrome b-c1 complex subunit 2, mitochondrial OS=Mus musculus GN=Uqcrc2 PE=1 SV=1                                                          |
| Q9DAV6                         | 0.391002219 | 2 | 0 | 0 | 0 | 0 | 0 | 0 | 0 | Protein Serpin9b OS=Mus musculus GN=Serp9b PE=1 SV=1                                                                                          |
| D3YU17                         | 0.391002219 | 3 | 0 | 0 | 0 | 0 | 0 | 0 | 0 | Nuclear receptor-binding protein OS=Mus musculus GN=Nrbp1 PE=1 SV=1                                                                           |
| D3YU19                         | 0.391002219 | 0 | 0 | 0 | 0 | 0 | 0 | 0 | 0 | Eukaryotic translation initiation factor 4E type 2 OS=Mus musculus GN=Eif4c2 PE=1 SV=1                                                        |
| Q8C3Y4                         | 0.391002219 | 0 | 2 | 0 | 0 | 0 | 0 | 0 | 0 | Kinectochore-associated protein 1 OS=Mus musculus GN=Kate1 PE=1 SV=2                                                                          |
| D3Z6W2                         | 0.391002219 | 0 | 2 | 0 | 0 | 0 | 0 | 0 | 0 | Tyrosine-protein phosphatase non-receptor type OS=Mus musculus GN=Ppn2 PE=1 SV=1                                                              |
| E9Q405                         | 0.391002219 | 3 | 0 | 0 | 0 | 0 | 0 | 0 | 0 | Unconventional myosin-XVIIIa OS=Mus musculus GN=Myo18a PE=1 SV=1                                                                              |
| Q8CE96                         | 0.391002219 | 0 | 0 | 0 | 0 | 0 | 0 | 0 | 0 | RNA oxidoreductase OS=Mus musculus GN=Trm6 OS=Mus musculus GN=Trm6 PE=1 SV=1                                                                  |
| A2A4P0                         | 0.391002219 | 2 | 0 | 0 | 0 | 0 | 0 | 0 | 0 | ATP-dependent RNA helicase DHX8 OS=Mus musculus GN=Dhx8 PE=2 SV=1                                                                             |
| Reverse_spQ62209[SYCP1_MOUSE]  | 0.391002219 | 2 | 0 | 0 | 0 | 0 | 0 | 0 | 0 | Synaptonemal complex protein 1 OS=Mus musculus GN=Syp1 PE=1 SV=2                                                                              |
| Q9CWX9                         | 0.391002219 | 2 | 0 | 0 | 0 | 0 | 0 | 0 | 0 | Probable ATP-dependent RNA helicase DDX47 OS=Mus musculus GN=Ddx47 PE=2 SV=2                                                                  |
| Q9PFD9                         | 0.391002219 | 0 | 0 | 0 | 2 | 0 | 0 | 0 | 0 | Nuclear pore complex protein Nup96 OS=Mus musculus GN=Nup96 PE=1 SV=2                                                                         |
| E9PZK3                         | 0.391002219 | 3 | 0 | 0 | 0 | 0 | 0 | 0 | 0 | Poly(A) polymerase alpha OS=Mus musculus GN=Papla PE=1 SV=1                                                                                   |
| Q8CDM1                         | 0.391002219 | 0 | 0 | 0 | 2 | 0 | 0 | 0 | 0 | ATPase family AAA domain-containing protein 2 OS=Mus musculus GN=Atad2 PE=1 SV=1                                                              |
| A2A4N9                         | 0.391002219 | 2 | 0 | 0 | 0 | 0 | 0 | 0 | 0 | ATP-dependent RNA helicase DHX3 (Fragment) OS=Mus musculus GN=Dhx3 PE=1 SV=8                                                                  |
| Q85F11                         | 0.391002219 | 0 | 0 | 0 | 0 | 0 | 0 | 0 | 0 | Geranylgeranyl transferase type-2 subunit beta OS=Mus musculus GN=Rabggpb PE=1 SV=1                                                           |
| G3XA09                         | 0.391002219 | 0 | 0 | 2 | 0 | 0 | 0 | 0 | 0 | Apoptotic protease-activating factor 1 OS=Mus musculus GN=Apaf1 PE=1 SV=1                                                                     |
| Reverse_spQ9MH9[MY18A_MOUSE]   | 0.391002219 | 0 | 0 | 2 | 0 | 0 | 0 | 0 | 0 | Unconventional myosin-XVIIIa OS=Mus musculus GN=Myo18a PE=1 SV=2                                                                              |
| B2RRE2                         | 0.391002219 | 3 | 0 | 0 | 0 | 0 | 0 | 0 | 0 | Myo18a protein OS=Mus musculus GN=Myo18a PE=1 SV=1                                                                                            |
| Q9CWX9                         | 0.391002219 | 0 | 0 | 0 | 0 | 0 | 0 | 0 | 0 | Nuclear protein 37 OS=Mus musculus GN=Nup37 PE=1 SV=2                                                                                         |
| A0A0J9YV48                     | 0.391002219 | 0 | 0 | 0 | 2 | 0 | 0 | 0 | 0 | Bifunctional polynucleotide phosphatase/kinase (Fragment) OS=Mus musculus GN=Ppk PE=1 SV=1                                                    |
| G64471                         | 0.391002219 | 0 | 2 | 0 | 0 | 0 | 0 | 0 | 0 | Glutathione S-transferase theta-1 OS=Mus musculus GN=Gat1 PE=1 SV=4                                                                           |
| A0A0J9YUR5                     | 0.391002219 | 0 | 2 | 0 | 0 | 0 | 0 | 0 | 0 | C-terminal-binding protein 1 (Fragment) OS=Mus musculus GN=Cbp1 PE=1 SV=1                                                                     |
| Q6RIL5                         | 0.391002219 | 0 | 0 | 0 | 0 | 0 | 0 | 0 | 0 | Cleavage-inducible protein OS=Mus musculus GN=Cip1 PE=1 SV=1                                                                                  |
| A2A4I8                         | 0.391002219 | 2 | 0 | 0 | 0 | 0 | 0 | 0 | 0 | Vacuolar protein-sorting-associated protein 25 OS=Mus musculus GN=Vps25 PE=1 SV=1                                                             |
| Q8VCV2                         | 0.391002219 | 0 | 2 | 0 | 0 | 0 | 0 | 0 | 0 | Nrdg3 protein OS=Mus musculus GN=Nrdg3 PE=1 SV=1                                                                                              |
| Q9DAK9                         | 0.391002219 | 4 | 0 | 0 | 0 | 0 | 0 | 0 | 0 | 14 kDa phosphohidrolase phosphatase OS=Mus musculus GN=Phtp1 PE=1 SV=1                                                                        |
| Q9ZGJ2                         | 0.391002219 | 0 | 0 | 0 | 0 | 0 | 0 | 0 | 0 | SRSF7 protein kinase 3 OS=Mus musculus GN=Sprk3 PE=1 SV=1                                                                                     |
| Reverse_trH7BX05[H7BX05_MOUSE] | 0.391002219 | 0 | 0 | 0 | 2 | 0 | 0 | 0 | 0 | Obscurin OS=Mus musculus GN=Obscn PE=1 SV=2                                                                                                   |
| E9Q3Y1                         | 0.391002219 | 0 | 0 | 0 | 2 | 0 | 0 | 0 | 0 | Serpin B6 (Fragment) OS=Mus musculus GN=Serp6b PE=1 SV=1                                                                                      |
| Q6NZH9                         | 0.391002219 | 0 | 0 | 2 | 0 | 0 | 0 | 0 | 0 | Protein Rasgrp3 OS=Mus musculus GN=Rasgrp3 PE=1 SV=1                                                                                          |
| E9Q3Z4                         | 0.391002219 | 0 | 0 | 4 | 0 | 0 | 0 | 0 | 0 | Lipopolysaccharide-responsive and beige-like anchor protein OS=Mus musculus GN=Lba PE=1 SV=1                                                  |
| Q8OWC7                         | 0.391002219 | 0 | 0 | 0 | 0 | 0 | 0 | 0 | 0 | Arc15 domain and SH2-containing protein 2 OS=Mus musculus GN=Aggf2 PE=1 SV=1                                                                  |
| Reverse_trA2AD39[A2AD39_MOUSE] | 0.391002219 | 0 | 2 | 0 | 0 | 0 | 0 | 0 | 0 | Cadherin-11 OS=Mus musculus GN=Cdh11 PE=1 SV=1                                                                                                |
| Q8OWC1                         | 0.391002219 | 0 | 0 | 0 | 0 | 0 | 0 | 0 | 0 | SCL-interrupting locus protein homolog OS=Mus musculus GN=Stil PE=4 SV=1                                                                      |
| Q8W588                         | 0.391002219 | 0 | 0 | 0 | 2 | 0 | 0 | 0 | 0 | Ubiquitin-2 OS=Mus musculus GN=Uba2 PE=1 SV=2                                                                                                 |
| Q9JL8C                         | 0.391002219 | 3 | 0 | 0 | 0 | 0 | 0 | 0 | 0 | HSBP1-associated protein 1 OS=Mus musculus GN=Hspbap1 PE=1 SV=2                                                                               |
| A0A0J9WRU0                     | 0.391002219 | 0 | 0 | 0 | 2 | 0 | 0 | 0 | 0 | Sacsin OS=Mus musculus GN=Sacs PE=1 SV=2                                                                                                      |
| Q9PJR8                         | 0.391002219 | 0 | 0 | 3 | 0 | 0 | 0 | 0 | 0 | Protein Tns1 (Fragment) OS=Mus musculus GN=Tns1 PE=1 SV=1                                                                                     |
| Q9CWX7                         | 0.391002219 | 0 | 0 | 0 | 0 | 0 | 0 | 0 | 0 | SWI/SNF-related matrix-associated actin-dependent regulator of chromatin subfamily D member 2 OS=Mus musculus GN=Smardc2 PE=1 SV=2            |
| Q7TMF2                         | 0.391002219 | 0 | 0 | 2 | 0 | 0 | 0 | 0 | 0 | 40S ribosomal protein S9 OS=Mus musculus GN=Rps9 PE=1 SV=1                                                                                    |
| Q88895                         | 0.391002219 | 4 | 0 | 0 | 0 | 0 | 0 | 0 | 0 | 3'-5' exonuclease 1 OS=Mus musculus GN=Er1 PE=1 SV=2                                                                                          |
| Q9PJX3                         | 0.391002219 | 0 | 0 | 4 | 0 | 0 | 0 | 0 | 0 | Histone deacetylase 3 OS=Mus musculus GN=Hdac3 PE=1 SV=1                                                                                      |
| A0A0J9YLY8                     | 0.391002219 | 0 | 0 | 0 | 0 | 0 | 0 | 0 | 0 | Golgi reassembly-stacking protein 2 OS=Mus musculus GN=Gorasp2 PE=1 SV=3                                                                      |
| Reverse_trE9QPE7[E9QPE7_MOUSE] | 0.391002219 | 2 | 0 | 0 | 0 | 0 | 0 | 0 | 0 | Ras protein-activating protein 2 (Fragment) OS=Mus musculus GN=Gbrp2 PE=1 SV=1                                                                |
| Q88879                         | 0.391002219 | 0 | 0 | 2 | 0 | 0 | 0 | 0 | 0 | Myosin-11 OS=Mus musculus GN=Myh11 PE=1 SV=1                                                                                                  |
| E9QMR2                         | 0.391002219 | 2 | 0 | 0 | 0 | 0 | 0 | 0 | 0 | Apoptotic protease-activating factor 1 OS=Mus musculus GN=Apaf1 PE=1 SV=3                                                                     |
| D3YU69                         | 0.391002219 | 0 | 0 | 0 | 0 | 0 | 0 | 0 | 0 | Dedicator of cytokinesis protein 9 OS=Mus musculus GN=Dock9 PE=1 SV=1                                                                         |
| Q9CY52                         | 0.391002219 | 0 | 0 | 4 | 0 | 0 | 0 | 0 | 0 | Quinone oxidoreductase (Fragment) OS=Mus musculus GN=Cyz2 PE=1 SV=1                                                                           |
| Q99K74                         | 0.391002219 | 0 | 2 | 0 | 0 | 0 | 0 | 0 | 0 | Probable RNA(His) guanylyltransferase OS=Mus musculus GN=Htg11 PE=1 SV=1                                                                      |
| A2AFF6                         | 0.391002219 | 0 | 0 | 3 | 0 | 0 | 0 | 0 | 0 | Mediator of RNA polymerase II transcription subunit 24 OS=Mus musculus GN=Med24 PE=1 SV=1                                                     |
| Q7TMC8                         | 0.391002219 | 0 | 0 | 0 | 0 | 0 | 0 | 0 | 0 | Cohesin subunit SA-2 OS=Mus musculus GN=Stag2 PE=1 SV=1                                                                                       |
| D3Z5W6                         | 0.391002219 | 2 | 0 | 0 | 0 | 0 | 0 | 0 | 0 | 1-fucosyltransferase OS=Mus musculus GN=1FUT1 PE=1 SV=1                                                                                       |
| P18242                         | 0.391002219 | 3 | 0 | 0 | 0 | 0 | 0 | 0 | 0 | Fatty acyl-CoA reductase (Fragment) OS=Mus musculus GN=Far1 PE=1 SV=1                                                                         |
| Reverse_spQ9JKK8[ATR_MOUSE]    | 0.391002219 | 0 | 2 | 0 | 0 | 0 | 0 | 0 | 0 | Cathepsin D OS=Mus musculus GN=Ctd PE=1 SV=1                                                                                                  |
| Q5SVF9                         | 0.391002219 | 3 | 0 | 0 | 0 | 0 | 0 | 0 | 0 | Serine/threonine-protein kinase ATR OS=Mus musculus GN=Attr PE=1 SV=2                                                                         |
| F6Y6L6                         | 0.391002219 | 5 | 0 | 0 | 0 | 0 | 0 | 0 | 0 | THO complex subunit 5 homolog OS=Mus musculus GN=Thoc5 PE=1 SV=1                                                                              |
| Q60963                         | 0.391002219 | 0 | 0 | 2 | 0 | 0 | 0 | 0 | 0 | Sodium channel subunit beta-2 OS=Mus musculus GN=Scn2b PE=1 SV=1                                                                              |
| Q9RRT2                         | 0.391002219 | 0 | 0 | 5 | 0 | 0 | 0 | 0 | 0 | Uncharacterized protein (Fragment) OS=Mus musculus GN=Ctd PE=1 SV=1                                                                           |
| E9QW65                         | 0.391002219 | 0 | 0 | 0 | 0 | 0 | 0 | 0 | 0 | Platel-activating factor acetylhydrolase OS=Mus musculus GN=Plat2 PE=2 SV=2                                                                   |
| Q9QYF9                         | 0.391002219 | 0 | 2 | 0 | 0 | 0 | 0 | 0 | 0 | SUMO-activating enzyme subunit 1 OS=Mus musculus GN=Sae1 PE=1 SV=1                                                                            |
| A2AWA9                         | 0.391002219 | 0 | 0 | 2 | 0 | 0 | 0 | 0 | 0 | E3 ubiquitin-protein ligase TRIM3 OS=Mus musculus GN=Trim3 PE=1 SV=1                                                                          |
| A2AWA7                         | 0.391002219 | 0 | 0 | 2 | 0 | 0 | 0 | 0 | 0 | Protein NDRG3 OS=Mus musculus GN=Ndr3 PE=1 SV=1                                                                                               |
| G3X920                         | 0.391002219 | 2 | 0 | 0 | 0 | 0 | 0 | 0 | 0 | Rab GTPase-activating protein 1 OS=Mus musculus GN=Rabgap1 PE=1 SV=1                                                                          |
| Reverse_spQ924A[CIC_MOUSE]     | 0.391002219 | 0 | 2 | 0 | 0 | 0 | 0 | 0 | 0 | Rab GTPase-activating protein 1 (Fragment) OS=Mus musculus GN=Rabgap1 PE=1 SV=1                                                               |
| A2AWB0                         | 0.391002219 | 0 | 0 | 2 | 0 | 0 | 0 | 0 | 0 | Armadillo repeat containing 8, isoform CRA a OS=Mus musculus GN=Arm8c PE=1 SV=1                                                               |
| Q6PVI6                         | 0.391002219 | 0 | 0 | 0 | 0 | 0 | 0 | 0 | 0 | Protein capcua homolog OS=Mus musculus GN=Cc PE=1 SV=2                                                                                        |
| A0A0J9YV13                     | 0.391002219 | 0 | 2 | 0 | 0 | 0 | 0 | 0 | 0 | Rab GTPase-activating protein 1 (Fragment) OS=Mus musculus GN=Rabgap1 PE=1 SV=8                                                               |
| Q3YJZ6                         | 0.391002219 | 0 | 0 | 2 | 0 | 0 | 0 | 0 | 0 | E3 ubiquitin-protein ligase OS=Mus musculus GN=Ephas PE=1 SV=1                                                                                |
| D3YTY3                         | 0.391002219 | 4 | 0 | 0 | 0 | 0 | 0 | 0 | 0 | C-terminal-binding protein 1 (Fragment) OS=Mus musculus GN=Cbp1 PE=1 SV=1                                                                     |
| P25667                         | 0.391002219 | 0 | 0 | 0 | 0 | 0 | 0 | 0 | 0 | Protein FAM98A OS=Mus musculus GN=Fam98a PE=1 SV=1                                                                                            |
| Q8CD92                         | 0.391002219 | 0 | 0 | 3 | 0 | 0 | 0 | 0 | 0 | Heterogeneous nuclear ribonucleoprotein D-like OS=Mus musculus GN=Hnrnpd1 PE=1 SV=1                                                           |
| P53612                         | 0.391002219 | 0 | 0 | 3 | 0 | 0 | 0 | 0 | 0 | MAK3-related protein OS=Mus musculus GN=Mac3 PE=1 SV=2                                                                                        |
| G3LXC0                         | 0.391002219 | 0 | 0 | 3 | 0 | 0 | 0 | 0 | 0 | Tetratricopeptide repeat protein 27 OS=Mus musculus GN=Trc27 PE=1 SV=2                                                                        |
| Reverse_spA2CG49[ALRN_MOUSE]   | 0.391002219 | 0 | 0 | 3 | 0 | 0 | 0 | 0 | 0 | Geranylgeranyl transferase type-2 subunit beta OS=Mus musculus GN=Rabggpb PE=1 SV=2                                                           |
| Q8BH72                         | 0.391002219 | 0 | 0 | 5 | 0 | 0 | 0 | 0 | 0 | SWI/SNF-related matrix-associated actin-dependent regulator of chromatin subfamily D member 2 (Fragment) OS=Mus musculus GN=Smardc2 PE=1 SV=1 |
| Q8BH72                         | 0.391002219 | 0 | 0 | 5 | 0 | 0 | 0 | 0 | 0 | Kat5 OS=Mus musculus GN=Kt5 PE=1 SV=1                                                                                                         |
| Q51443                         | 0.391002219 | 0 | 0 | 2 | 0 | 0 | 0 | 0 | 0 | Nucleolar complex protein 4 homolog OS=Mus musculus GN=Noc4l PE=2 SV=1                                                                        |
| G3LXU0                         | 0.391002219 | 0 | 0 | 2 | 0 | 0 | 0 | 0 | 0 | Unconventional myosin-1c OS=Mus musculus GN=Myo1c PE=1 SV=2                                                                                   |
| Reverse_spQ9WT17[MYO1C_MOUSE]  | 0.391002219 | 0 | 0 | 2 | 0 | 0 | 0 | 0 | 0 | Sarcoplasmic/endoplasmic reticulum calcium ATPase 2 OS=Mus musculus GN=Atp2a2 PE=1 SV=2                                                       |
| Q51443                         | 0.391002219 | 0 | 0 | 2 | 0 | 0 | 0 | 0 | 0 | Protein Gm909 OS=Mus musculus GN=Gm909 PE=1 SV=1                                                                                              |
| G3LXU0                         | 0.391002219 | 0 | 0 | 3 | 0 | 0 | 0 | 0 | 0 | Bifunctional lysine-specific demethylase and histidyl-hydroxylase MINA OS=Mus musculus GN=Mina PE=1 SV=2                                      |
| Q3UVL4                         | 0.391002219 | 0 | 3 | 0 | 0 | 0 | 0 | 0 | 0 | Vacuolar protein sorting-associated protein 51 homolog OS=Mus musculus GN=Vps51 PE=1 SV=2                                                     |
| Q8R0J7                         | 0.391002219 | 2 | 0 | 0 | 0 | 0 | 0 | 0 | 0 | Rab3 GTPase-activating protein catalytic subunit OS=Mus musculus GN=Rab3ap1 PE=1 SV=4                                                         |
| Q9QJ45                         | 0.391002219 | 0 | 0 | 0 | 0 | 0 | 0 | 0 | 0 | Nuclear receptor-binding protein OS=Mus musculus GN=Nrbp1 PE=1 SV=1                                                                           |
| Q9DAE6                         | 0.391002219 | 0 | 2 | 0 | 0 | 0 | 0 | 0 | 0 | Exosome complex component CSL4 OS=Mus musculus GN=Eosc4 PE=1 SV=1                                                                             |
| Reverse_trB2RRE2[B2RRE2_MOUSE] | 0.391002219 | 0 | 0 | 2 | 0 | 0 | 0 | 0 | 0 | Myo18a protein OS=Mus musculus GN=Myo18a PE=1 SV=1                                                                                            |
| Q54781                         | 0.391002219 | 0 | 2 | 0 | 0 | 0 | 0 | 0 | 0 | SRSF5 protein kinase 2 OS=Mus musculus GN=Sprk2 PE=1 SV=2                                                                                     |
| Reverse_trD6RHQ6[D6RHQ6_MOUSE] | 0.391002219 | 0 | 2 | 0 | 0 | 0 | 0 | 0 | 0 | Ubiquitinyl hydrolase 1 OS=Mus musculus GN=Usp16 PE=1 SV=1                                                                                    |
| Q8R8Q5                         | 0.391002219 | 0 | 0 | 0 | 0 | 0 | 0 | 0 | 0 | Cleavage-stimulation factor subunit 2 OS=Mus musculus GN=Csf2 PE=1 SV=2                                                                       |
| Reverse_trF6VZH1[F6VZH1_MOUSE] | 0.391002219 | 0 | 2 | 0 | 0 | 0 | 0 | 0 | 0 | Small G protein-signaling modulator 3 (Fragment) OS=Mus musculus GN=Sgsm3 PE=1 SV=1                                                           |
| Reverse_spP93781[P93781_MOUSE] | 0.391002219 | 3 | 0 | 0 | 0 | 0 | 0 | 0 | 0 | Interleukin-12 receptor subunit beta-2 OS=Mus musculus GN=Il12rb2 PE=1 SV=1                                                                   |
| Q9P977                         | 0.391002219 | 0 | 2 | 0 | 0 | 0 | 0 | 0 | 0 | DNA damage-binding protein 2 OS=Mus musculus GN=Ddb2 PE=1 SV=1                                                                                |
| Q9JY41                         | 0.391002219 | 0 | 0 | 0 | 0 | 0 | 0 | 0 | 0 | Transcription factor E2-alpha (Fragment) OS=Mus musculus GN=Tfe2a PE=1 SV=1                                                                   |
| Q8R8R7                         | 0.391002219 | 2 | 0 | 0 | 0 | 0 | 0 | 0 | 0 | Sec1 family domain-containing protein 1 OS=Mus musculus GN=Secf1 PE=1 SV=1                                                                    |
| Q9QSC9                         | 0.391002219 | 0 | 3 | 0 | 0 | 0 | 0 | 0 | 0 | Protein Nole1 OS=Mus musculus GN=Nole1 PE=1 SV=1                                                                                              |
| Q8VCDS                         | 0.391002219 | 2 | 0 | 0 | 0 | 0 | 0 | 0 | 0 | Mediator of RNA polymerase II transcription subunit 17 OS=Mus musculus GN=Med17 PE=1 SV=1                                                     |
| P18400                         | 0.391002219 | 2 | 0 | 0 | 0 | 0 | 0 | 0 | 0 | Rennin OS=Mus musculus GN=Rnn PE=1 SV=1                                                                                                       |
| Q8OUW8                         | 0.391002219 | 3 | 0 | 0 | 0 | 0 | 0 | 0 | 0 | DNA-directed RNA polymerases I, II, and III subunit RPABC1 OS=Mus musculus GN=Por2c PE=1 SV=1                                                 |
| FC7CS8                         | 0.391002219 | 0 | 0 | 0 | 5 | 0 | 0 | 0 | 0 | 40S ribosomal protein S9 (Fragment) OS=Mus musculus GN=Rps9 PE=1 SV=1                                                                         |
| A2AP29                         | 0.391002219 | 0 | 2 | 0 | 0 | 0 | 0 | 0 | 0 | Probable ATP-dependent RNA helicase DDX58 (Fragment) OS=Mus musculus GN=Ddx58 PE=1 SV=1                                                       |
| Q9Q899                         | 0.391002219 | 0 | 0 | 0 | 0 | 0 | 0 | 0 | 0 | Probable ATP-dependent RNA helicase DDX58 OS=Mus musculus GN=Ddx58 PE=1 SV=1                                                                  |
| Q5SU72                         | 0.391002219 | 0 | 0 | 2 | 0 | 0 | 0 | 0 | 0 | Luc1-like protein OS=Mus musculus GN=Luc1 PE=1 SV=1                                                                                           |
| Q8VCF1                         | 0.391002219 | 0 | 0 | 3 | 0 | 0 | 0 | 0 | 0 | Soluble calcium-activated nucleotidase 1 OS=Mus musculus GN=Cant1 PE=2 SV=1                                                                   |
| Q6P458                         | 0.391002219 | 2 | 0 | 0 | 0 | 0 | 0 | 0 | 0 | Integrator complex subunit 1 OS=Mus musculus GN=Ints1 PE=1 SV=2                                                                               |
| Q6P459                         | 0.39100     |   |   |   |   |   |   |   |   |                                                                                                                                               |



|                                |             |   |    |   |   |   |   |   |    |                                                                                                          |
|--------------------------------|-------------|---|----|---|---|---|---|---|----|----------------------------------------------------------------------------------------------------------|
| E9Q108                         | 0.391002219 | 0 | 0  | 0 | 2 | 0 | 0 | 0 | 0  | Serin B6 (Fragment) OS=Mus musculus GN=Serpib6 PE=1 SV=8                                                 |
| A2AKG8                         | 0.391002219 | 0 | 0  | 3 | 0 | 0 | 0 | 0 | 0  | Focadhesin OS=Mus musculus GN=Focad PE=1 SV=1                                                            |
| A0A0G2H17                      | 0.391002219 | 2 | 0  | 0 | 0 | 0 | 0 | 0 | 0  | Integrator complex subunit 1 OS=Mus musculus GN=Ints1 PE=1 SV=1                                          |
| G5ESS8                         | 0.391002219 | 0 | 2  | 0 | 0 | 0 | 0 | 0 | 0  | MAGUK p55 subfamily member 7 OS=Mus musculus GN=Mpp7 PE=1 SV=1                                           |
| E9QC93                         | 0.391002219 | 0 | 0  | 2 | 0 | 0 | 0 | 0 | 0  | Afdin OS=Mus musculus GN=Afdn PE=1 SV=1                                                                  |
| A0A0G2JGQ4                     | 0.391002219 | 3 | 0  | 0 | 0 | 0 | 0 | 0 | 0  | NEDD8 ultimate buster 1 OS=Mus musculus GN=Nub1 PE=1 SV=1                                                |
| PS2432                         | 0.391002219 | 0 | 0  | 2 | 0 | 0 | 0 | 0 | 0  | DNA-directed RNA polymerase I and III subunit RPAC1 OS=Mus musculus GN=Pohr1c PE=1 SV=3                  |
| Q9Z176                         | 0.391002219 | 0 | 74 | 0 | 0 | 0 | 0 | 0 | 0  | Keratin, type II cuticular H5 OS=Mus musculus GN=Krt5 PE=1 SV=2                                          |
| Reverse_sp Q61468 MSLN_MOUSE   | 0.391002219 | 5 | 0  | 0 | 0 | 0 | 0 | 0 | 0  | Mesothelin OS=Mus musculus GN=Msln PE=1 SV=1                                                             |
| Q8BTZ4                         | 0.391002219 | 0 | 0  | 2 | 0 | 0 | 0 | 0 | 0  | Anaphase-promoting complex subunit 5 OS=Mus musculus GN=Anap5 PE=1 SV=1                                  |
| A0A0G2JE97                     | 0.391002219 | 0 | 0  | 0 | 3 | 0 | 0 | 0 | 0  | MCG123425, isoform CRA_a OS=Mus musculus GN=Trc14 PE=1 SV=1                                              |
| Reverse_tr D3YVU1 D3YVU1_MOUSE | 0.391002219 | 0 | 2  | 0 | 0 | 0 | 0 | 0 | 0  | Ubiquitinyl hydrolase 1 OS=Mus musculus GN=Ubl16 PE=1 SV=1                                               |
| Q9CQT0                         | 0.391002219 | 0 | 0  | 4 | 0 | 0 | 0 | 0 | 0  | rRNA(His) guanylyltransferase OS=Mus musculus GN=Thg11 PE=1 SV=1                                         |
| Q5U452                         | 0.391002219 | 2 | 0  | 0 | 0 | 0 | 0 | 0 | 0  | MCG14616 OS=Mus musculus GN=2810408M9Rik PE=1 SV=1                                                       |
| D3ZAN9                         | 0.391002219 | 2 | 0  | 0 | 0 | 0 | 0 | 0 | 0  | Fatty acyl-CoA reductase (Fragment) OS=Mus musculus GN=Far1 PE=1 SV=8                                    |
| A2AA62                         | 0.391002219 | 0 | 0  | 2 | 0 | 0 | 0 | 0 | 0  | RNA-binding protein Raly (Fragment) OS=Mus musculus GN=Raly PE=1 SV=1                                    |
| Q8BTW3                         | 0.391002219 | 0 | 0  | 2 | 0 | 0 | 0 | 0 | 0  | Exosome complex component MTR3 OS=Mus musculus GN=Exosc6 PE=1 SV=1                                       |
| E9Q614                         | 0.391002219 | 0 | 0  | 5 | 0 | 0 | 0 | 0 | 0  | Protein Chd3 OS=Mus musculus GN=Chd3 PE=1 SV=1                                                           |
| Q5DTF9                         | 0.391002219 | 0 | 2  | 0 | 0 | 0 | 0 | 0 | 0  | Myopalladin OS=Mus musculus GN=Mypn PE=1 SV=2                                                            |
| Reverse_sp Q03517 SCG2_MOUSE   | 0.391002219 | 0 | 4  | 0 | 0 | 0 | 0 | 0 | 0  | Secretogranin-2 OS=Mus musculus GN=Scg2 PE=1 SV=1                                                        |
| Q35685                         | 0.391002219 | 0 | 0  | 4 | 0 | 0 | 0 | 0 | 0  | Nuclear migration protein nudC OS=Mus musculus GN=Nudec PE=1 SV=1                                        |
| Q8BLN5                         | 0.391002219 | 0 | 0  | 4 | 0 | 0 | 0 | 0 | 0  | Lanosterol synthase OS=Mus musculus GN=Las PE=1 SV=2                                                     |
| A2AT05                         | 0.391002219 | 0 | 0  | 2 | 0 | 0 | 0 | 0 | 0  | Anaphase-promoting complex subunit 1 OS=Mus musculus GN=Anap1 PE=1 SV=1                                  |
| F8WH18                         | 0.391002219 | 0 | 4  | 0 | 0 | 0 | 0 | 0 | 0  | Calcium-transporting ATPase OS=Mus musculus GN=Atp2b2 PE=1 SV=1                                          |
| Reverse_sp Q9CXY9 GPIS_MOUSE   | 0.391002219 | 2 | 0  | 0 | 0 | 0 | 0 | 0 | 0  | GPI-anchor transamidase OS=Mus musculus GN=Plgk PE=1 SV=2                                                |
| Q7TNV0                         | 0.391002219 | 0 | 0  | 2 | 0 | 0 | 0 | 0 | 0  | Protein DEK OS=Mus musculus GN=Dek PE=1 SV=1                                                             |
| A0A0G2JEB3                     | 0.391002219 | 0 | 0  | 2 | 0 | 0 | 0 | 0 | 0  | Farnesyl pyrophosphate synthase (Fragment) OS=Mus musculus GN=Fdps PE=4 SV=4                             |
| A0A0R4I24                      | 0.391002219 | 0 | 0  | 0 | 0 | 0 | 0 | 0 | 0  | SRSF7 protein kinase 2 OS=Mus musculus GN=Sprk2 PE=1 SV=1                                                |
| P70257                         | 0.391002219 | 0 | 0  | 5 | 0 | 0 | 0 | 0 | 0  | Nuclear factor 1 X-type OS=Mus musculus GN=Nfx1 PE=1 SV=2                                                |
| Q35638                         | 0.391002219 | 0 | 0  | 3 | 0 | 0 | 0 | 0 | 0  | Cohesin subunit SA-2 OS=Mus musculus GN=Sadg2 PE=1 SV=3                                                  |
| F6VAR3                         | 0.391002219 | 0 | 2  | 0 | 0 | 0 | 0 | 0 | 0  | Transducin beta-like protein 3 (Fragment) OS=Mus musculus GN=Tb3 PE=1 SV=1                               |
| E9Q2F6                         | 0.391002219 | 0 | 0  | 0 | 0 | 0 | 0 | 0 | 47 | Polyubiquitin (Fragment) OS=Mus musculus GN=Ubc PE=1 SV=1                                                |
| A0A0G2JEAS                     | 0.391002219 | 0 | 0  | 2 | 0 | 0 | 0 | 0 | 0  | Protein Gm43738 OS=Mus musculus GN=Gm43738 PE=4 SV=1                                                     |
| P70275                         | 0.391002219 | 0 | 0  | 2 | 0 | 0 | 0 | 0 | 0  | Semaphorin-3E OS=Mus musculus GN=Sema3c PE=1 SV=1                                                        |
| Q543M9                         | 0.391002219 | 2 | 0  | 0 | 0 | 0 | 0 | 0 | 0  | MCC14605, isoform CRA_c OS=Mus musculus GN=Trp53rbk PE=1 SV=1                                            |
| E9QNV8                         | 0.391002219 | 3 | 0  | 0 | 0 | 0 | 0 | 0 | 0  | Sacsin OS=Mus musculus GN=Scsn PE=1 SV=1                                                                 |
| A0A0H2UH27                     | 0.391002219 | 0 | 2  | 0 | 0 | 0 | 0 | 0 | 0  | Fragile X mental retardation syndrome-related protein 1 OS=Mus musculus GN=Frxl PE=1 SV=1                |
| Q9CQ16                         | 0.391002219 | 3 | 0  | 0 | 0 | 0 | 0 | 0 | 0  | Coactosin-like protein OS=Mus musculus GN=Cot1 PE=1 SV=3                                                 |
| Q9CQ17                         | 0.391002219 | 3 | 0  | 0 | 0 | 0 | 0 | 0 | 0  | U2 small nuclear ribonucleoprotein B' OS=Mus musculus GN=Snrpb2 PE=1 SV=1                                |
| Q9D312                         | 0.391002219 | 0 | 0  | 2 | 0 | 0 | 0 | 0 | 0  | Keratin, type I cytotokeratin 20 OS=Mus musculus GN=Krt20 PE=1 SV=1                                      |
| A0A140L1W6                     | 0.391002219 | 0 | 0  | 0 | 0 | 0 | 0 | 0 | 0  | DNA topoisomerase delta subunit 3 (Fragment) OS=Mus musculus GN=Polb3 PE=1 SV=1                          |
| A2AT18                         | 0.391002219 | 0 | 0  | 4 | 0 | 0 | 0 | 0 | 0  | Golgi reassembly-stacking protein 2 OS=Mus musculus GN=Gorasp2 PE=1 SV=1                                 |
| A2AT16                         | 0.391002219 | 0 | 0  | 4 | 0 | 0 | 0 | 0 | 0  | Golgi reassembly stacking protein 2, isoform CRA_c OS=Mus musculus GN=Gorasp2 PE=1 SV=1                  |
| A2AT19                         | 0.391002219 | 0 | 0  | 4 | 0 | 0 | 0 | 0 | 0  | Golgi reassembly stacking protein 2, isoform CRA_d OS=Mus musculus GN=Gorasp2 PE=1 SV=1                  |
| Reverse_tr Q08638 MYH11_MOUSE  | 0.391002219 | 2 | 2  | 0 | 0 | 0 | 0 | 0 | 0  | Myosin-11 OS=Mus musculus GN=Myh11 PE=1 SV=1                                                             |
| Reverse_tr F7ABZ6 F7ABZ6_MOUSE | 0.391002219 | 0 | 2  | 0 | 0 | 0 | 0 | 0 | 0  | Protein Dnah10 OS=Mus musculus GN=Dnah10 PE=1 SV=2                                                       |
| E9Q1P9                         | 0.391002219 | 0 | 2  | 0 | 0 | 0 | 0 | 0 | 0  | E3 ubiquitin-protein ligase TRIM33 OS=Mus musculus GN=Trim33 PE=1 SV=1                                   |
| P61886                         | 0.391002219 | 2 | 0  | 0 | 0 | 0 | 0 | 0 | 0  | Chromobox protein homolog 3 OS=Mus musculus GN=Cbox3 PE=1 SV=1                                           |
| B1AT45                         | 0.391002219 | 0 | 0  | 0 | 0 | 0 | 0 | 0 | 0  | Keratin, type I cuticular Hs2 OS=Mus musculus GN=Krt2 PE=1 SV=1                                          |
| Q3TW77                         | 0.391002219 | 0 | 0  | 2 | 0 | 0 | 0 | 0 | 0  | Anaphase-promoting complex subunit 5 OS=Mus musculus GN=Anap5 PE=1 SV=1                                  |
| Q3UR91                         | 0.391002219 | 0 | 0  | 5 | 0 | 0 | 0 | 0 | 0  | Pumilo homolog 2 OS=Mus musculus GN=Pum2 PE=1 SV=1                                                       |
| Q99M74                         | 0.391002219 | 0 | 3  | 0 | 0 | 0 | 0 | 0 | 0  | Keratin, type II cuticular Hb2 OS=Mus musculus GN=Krt2 PE=1 SV=2                                         |
| Q8C1H8                         | 0.391002219 | 0 | 0  | 0 | 0 | 0 | 0 | 0 | 0  | Cell division cycle and apoptosis regulator protein 1 OS=Mus musculus GN=Cear1 PE=1 SV=1                 |
| P99026                         | 0.391002219 | 2 | 0  | 0 | 0 | 0 | 0 | 0 | 0  | Thesaurus subunit beta type-4 OS=Mus musculus GN=Pmb4 PE=1 SV=1                                          |
| Q9CZX7                         | 0.391002219 | 0 | 3  | 0 | 0 | 0 | 0 | 0 | 0  | Type 2 phosphatidylinositol 4,5-bisphosphate 4-phosphatase OS=Mus musculus GN=Tmem55a PE=1 SV=1          |
| D3Z440                         | 0.391002219 | 0 | 0  | 2 | 0 | 0 | 0 | 0 | 0  | COP9 signalosome complex subunit 7a (Fragment) OS=Mus musculus GN=Cop7a PE=1 SV=1                        |
| F9VQ15                         | 0.391002219 | 0 | 0  | 0 | 0 | 0 | 0 | 0 | 0  | Heterocytosine ribosyltransferase D-like (Fragment) OS=Mus musculus GN=Hrt1 PE=1 SV=1                    |
| Reverse_sp Q9J18 LRP1B_MOUSE   | 0.391002219 | 0 | 0  | 2 | 0 | 0 | 0 | 0 | 0  | Low-density lipoprotein receptor-related protein 1B OS=Mus musculus GN=Lrp1b PE=1 SV=1                   |
| Q3UQ22                         | 0.391002219 | 0 | 0  | 0 | 0 | 0 | 0 | 0 | 0  | F-BAR domain only protein 2 OS=Mus musculus GN=Fcho2 PE=1 SV=1                                           |
| A0A0G2JED3                     | 0.391002219 | 0 | 0  | 2 | 0 | 0 | 0 | 0 | 0  | Anaphase-promoting complex subunit 5 OS=Mus musculus GN=Anap5 PE=1 SV=1                                  |
| A0A0G2JDM7                     | 0.391002219 | 0 | 0  | 0 | 0 | 0 | 0 | 0 | 0  | Anaphase-promoting complex subunit 5 OS=Mus musculus GN=Anap5 PE=1 SV=1                                  |
| S4R1Y5                         | 0.391002219 | 0 | 2  | 0 | 0 | 0 | 0 | 0 | 0  | Ribosome production factor 2 homolog (Fragment) OS=Mus musculus GN=Rpf2 PE=1 SV=1                        |
| Q3UA06                         | 0.391002219 | 0 | 0  | 4 | 0 | 0 | 0 | 0 | 0  | Pachytene checkpoint protein 2 homolog OS=Mus musculus GN=Trip13 PE=1 SV=1                               |
| Q9CZ06                         | 0.391002219 | 0 | 2  | 0 | 0 | 0 | 0 | 0 | 0  | Retinoic acid early-inducible protein 1-epsilon OS=Mus musculus GN=Rae1c PE=1 SV=1                       |
| Q6N5L3                         | 0.391002219 | 0 | 0  | 0 | 0 | 0 | 0 | 0 | 0  | Glycyltransferase 8 domain-containing protein 1 OS=Mus musculus GN=G8d1 PE=1 SV=1                        |
| A0A0G2JDK3                     | 0.391002219 | 0 | 0  | 3 | 0 | 0 | 0 | 0 | 0  | Geranylgeranyl transferase type-2 subunit beta (Fragment) OS=Mus musculus GN=Rabggpb PE=1 SV=1           |
| Reverse_tr F6YVMV F6YVMV_MOUSE | 0.391002219 | 3 | 0  | 0 | 0 | 0 | 0 | 0 | 0  | Angiomotin (Fragment) OS=Mus musculus GN=Anot PE=1 SV=1                                                  |
| Q9DBT6                         | 0.391002219 | 0 | 0  | 2 | 0 | 0 | 0 | 0 | 0  | Protein Tns1 OS=Mus musculus GN=Tns1 PE=1 SV=1                                                           |
| Q497H4                         | 0.391002219 | 0 | 29 | 0 | 0 | 0 | 0 | 0 | 0  | Keratin, type I cuticular H5 OS=Mus musculus GN=Krt5 PE=1 SV=1                                           |
| Q9DBT5                         | 0.391002219 | 0 | 0  | 0 | 0 | 0 | 0 | 0 | 0  | AMP deaminase 2 OS=Mus musculus GN=Ampd2 PE=1 SV=1                                                       |
| Reverse_tr Q4W8U9 Q4W8U9_MOUSE | 0.391002219 | 0 | 2  | 0 | 0 | 0 | 0 | 0 | 0  | Scg2 protein OS=Mus musculus GN=Scg2 PE=1 SV=1                                                           |
| F6VJC5                         | 0.391002219 | 0 | 2  | 0 | 0 | 0 | 0 | 0 | 0  | Protein Sec24b (Fragment) OS=Mus musculus GN=Sec24b PE=1 SV=1                                            |
| F8W1E5                         | 0.391002219 | 0 | 0  | 0 | 0 | 0 | 0 | 0 | 0  | E3 ubiquitin-protein ligase HECTD1 OS=Mus musculus GN=Hectd1 PE=1 SV=1                                   |
| A0A140L1Y7                     | 0.391002219 | 0 | 0  | 0 | 0 | 0 | 0 | 0 | 0  | Ureidyltransferase delta subunit 3 OS=Mus musculus GN=Ud3 PE=1 SV=1                                      |
| G3X963                         | 0.391002219 | 0 | 0  | 0 | 2 | 0 | 0 | 0 | 0  | ATPase family AAA domain-containing protein 2 OS=Mus musculus GN=Atad2 PE=1 SV=1                         |
| A0A0R4J079                     | 0.391002219 | 0 | 0  | 5 | 0 | 0 | 0 | 0 | 0  | Acyl-Coenzyme A binding domain containing 3, isoform CRA_b OS=Mus musculus GN=Acbd3 PE=1 SV=1            |
| K3W4P2                         | 0.391002219 | 2 | 0  | 0 | 0 | 0 | 0 | 0 | 0  | Integrator complex subunit 1 OS=Mus musculus GN=Int1 PE=1 SV=2                                           |
| Q9DBR3                         | 0.391002219 | 0 | 0  | 0 | 0 | 0 | 0 | 0 | 0  | Armitol repeat-containing protein 5 OS=Mus musculus GN=Armc5 PE=1 SV=2                                   |
| Q9QYX7                         | 0.391002219 | 0 | 2  | 0 | 0 | 0 | 0 | 0 | 0  | Protein piccolo OS=Mus musculus GN=Pico PE=1 SV=4                                                        |
| Reverse_sp A2ARZ3 FSIP2_MOUSE  | 0.391002219 | 0 | 2  | 0 | 0 | 0 | 0 | 0 | 0  | Fibrous sheath-interacting protein 2 OS=Mus musculus GN=Fsip2 PE=1 SV=3                                  |
| A8C756                         | 0.391002219 | 0 | 0  | 0 | 2 | 0 | 0 | 0 | 0  | Thyroid adenoma-associated protein homolog OS=Mus musculus GN=Thada PE=1 SV=1                            |
| G3X9C7                         | 0.391002219 | 0 | 0  | 0 | 0 | 0 | 0 | 0 | 0  | Vacuolar protein sorting 16 (Tssai) OS=Mus musculus GN=Vps16 PE=1 SV=1                                   |
| Q9C800                         | 0.391002219 | 2 | 0  | 0 | 0 | 0 | 0 | 0 | 0  | Vacuolar protein-sorting-associated protein 2 OS=Mus musculus GN=Vps25 PE=1 SV=1                         |
| Q9JLZ6                         | 0.391002219 | 4 | 0  | 0 | 0 | 0 | 0 | 0 | 0  | Hypermethylation in cancer 2 protein OS=Mus musculus GN=Hic2 PE=2 SV=4                                   |
| A0A0G2JF90                     | 0.391002219 | 0 | 0  | 0 | 3 | 0 | 0 | 0 | 0  | Tetratricopeptide repeat protein 14 (Fragment) OS=Mus musculus GN=Trc14 PE=1 SV=1                        |
| A0A0G2JEP0                     | 0.391002219 | 0 | 0  | 0 | 0 | 0 | 0 | 0 | 0  | MCG123425, isoform CRA_f OS=Mus musculus GN=Trc14 PE=1 SV=1                                              |
| Q3UGX2                         | 0.391002219 | 0 | 0  | 0 | 2 | 0 | 0 | 0 | 0  | Putative uncharacterized protein OS=Mus musculus GN=Spb PE=1 SV=1                                        |
| K3W4L0                         | 0.391002219 | 3 | 0  | 0 | 0 | 0 | 0 | 0 | 0  | Unconventional myosin-XVIIIa OS=Mus musculus GN=Myo18a PE=1 SV=1                                         |
| Q99K18                         | 0.391002219 | 0 | 2  | 0 | 0 | 0 | 0 | 0 | 0  | Serine/threonine-protein kinase 24 OS=Mus musculus GN=Sk24 PE=1 SV=1                                     |
| Reverse_tr E9QP01 E9QP01_MOUSE | 0.391002219 | 0 | 0  | 0 | 0 | 0 | 0 | 0 | 0  | Protein caprin4 homolog OS=Mus musculus GN=Cc4 PE=1 SV=2                                                 |
| Reverse_sp QBKN5 CCP5_MOUSE    | 0.391002219 | 0 | 0  | 2 | 0 | 0 | 0 | 0 | 0  | Gammabubulin complex component 5 OS=Mus musculus GN=Tubepp5 PE=1 SV=2                                    |
| Q99K65                         | 0.391002219 | 3 | 0  | 0 | 0 | 0 | 0 | 0 | 0  | Lipolysis-stimulated lipoprotein receptor OS=Mus musculus GN=Lsr PE=1 SV=1                               |
| D3Z3C0                         | 0.391002219 | 0 | 0  | 0 | 7 | 0 | 0 | 0 | 0  | Septin-2 (Fragment) OS=Mus musculus GN=Sept2 PE=1 SV=1                                                   |
| Reverse_tr Q8L63 Q8L63_MOUSE   | 0.391002219 | 0 | 0  | 0 | 0 | 0 | 0 | 0 | 0  | GPI-anchor transamidase OS=Mus musculus GN=Plgk PE=1 SV=1                                                |
| P70372                         | 0.391002219 | 0 | 0  | 4 | 0 | 0 | 0 | 0 | 0  | ELAV-like protein 1 OS=Mus musculus GN=Elavl1 PE=1 SV=2                                                  |
| A2AE27                         | 0.391002219 | 0 | 2  | 0 | 0 | 0 | 0 | 0 | 0  | AMP deaminase 2 OS=Mus musculus GN=Ampd2 PE=1 SV=1                                                       |
| A0A087WQ94                     | 0.391002219 | 0 | 0  | 0 | 2 | 0 | 0 | 0 | 0  | Protein Tns1 (Fragment) OS=Mus musculus GN=Tns1 PE=1 SV=1                                                |
| P15388                         | 0.391002219 | 0 | 0  | 0 | 0 | 0 | 0 | 0 | 0  | Spectrin beta chain, erythrocytic OS=Mus musculus GN=Spb PE=1 SV=4                                       |
| E9PLH7                         | 0.391002219 | 0 | 0  | 5 | 0 | 0 | 0 | 0 | 0  | Nuclear factor 1 OS=Mus musculus GN=Nfx1 PE=1 SV=1                                                       |
| A0A0R4J011                     | 0.391002219 | 0 | 0  | 0 | 2 | 0 | 0 | 0 | 0  | Transcription factor E2-alpha OS=Mus musculus GN=Tcf3 PE=1 SV=1                                          |
| E9PLJ6                         | 0.391002219 | 0 | 2  | 0 | 0 | 0 | 0 | 0 | 0  | E3 ubiquitin-protein ligase MYCBP2 OS=Mus musculus GN=Myebp2 PE=1 SV=1                                   |
| A0A087WP17                     | 0.391002219 | 3 | 0  | 0 | 0 | 0 | 0 | 0 | 0  | Phosphatidylinositol 3,4,5-trisphosphate 5-phosphatase 2 (Fragment) OS=Mus musculus GN=Inpp1l1 PE=1 SV=1 |
| PQ2748                         | 0.391002219 | 3 | 0  | 0 | 0 | 0 | 0 | 0 | 0  | Hippocampal-like protein 1 OS=Mus musculus GN=Hlpl1 PE=1 SV=1                                            |
| Q9M1H9                         | 0.391002219 | 0 | 0  | 0 | 0 | 0 | 0 | 0 | 0  | Unconventional myosin-XVIIIa OS=Mus musculus GN=Myo18a PE=1 SV=2                                         |
| Q8BKX6                         | 0.391002219 | 0 | 0  | 2 | 0 | 0 | 0 | 0 | 0  | Serine/threonine-protein kinase SMG1 OS=Mus musculus GN=Sng1 PE=1 SV=3                                   |
| Reverse_tr Q6DFZ1 Q6DFZ1_MOUSE | 0.391002219 | 0 | 0  | 5 | 0 | 0 | 0 | 0 | 0  | Golgi-specific brefeldin A-resistance factor 1 OS=Mus musculus GN=Gbf1 PE=1 SV=1                         |
| A0A0R4J066                     | 0.391002219 | 0 | 0  | 0 | 0 | 0 | 0 | 0 | 0  | C-terminal binding protein 1, isoform CRA_a OS=Mus musculus GN=Cbp1 PE=1 SV=1                            |
| A2AER8                         | 0.391002219 | 3 | 0  | 0 | 0 | 0 | 0 | 0 | 0  | Cleavage stimulation factor subunit 2 (Fragment) OS=Mus musculus GN=Csf2 PE=1 SV=1                       |
| F6QKD2                         | 0.391002219 | 2 | 0  | 0 | 0 | 0 | 0 | 0 | 0  | Probable ATP-dependent RNA helicase DDX47 (Fragment) OS=Mus musculus GN=DDX47 PE=1 SV=1                  |
| Q9CQC8                         | 0.391002219 | 0 | 3  | 0 | 0 | 0 | 0 | 0 | 0  | Maspartin OS=Mus musculus GN=Sp21 PE=1 SV=1                                                              |
| A2AER1                         | 0.391002219 | 3 | 0  | 0 | 0 | 0 | 0 | 0 | 0  | Alphafetf-4 variant 4 OS=Mus musculus GN=AF2 PE=1 SV=1                                                   |
| Q9CQC9                         | 0.391002219 | 0 | 0  | 6 | 0 | 0 | 0 | 0 | 0  | GTP-binding protein SAR                                                                                  |

Table S2. Only 748 proteins fractions with significance P-value ≤ 0.05 are further analyzed.

| Accession   | T-test p-value | Spectral count for eluted EV (WT) |         |         |         | Spectral count for non-eluted EV (KO) |         |         |         | Description                                                                                           |
|-------------|----------------|-----------------------------------|---------|---------|---------|---------------------------------------|---------|---------|---------|-------------------------------------------------------------------------------------------------------|
|             |                | Sample1                           | Sample2 | Sample3 | Sample4 | Sample1                               | Sample2 | Sample3 | Sample4 |                                                                                                       |
| A2ASQ1      | 1.2973E-05     | 40                                | 30      | 42      | 91      | 71                                    | 63      |         |         | 61 Agrin OS=Mus musculus GN=Agrn PE=1 SV=1                                                            |
| E9Q1490     | 1.9445E-05     | 0                                 | 0       | 0       | 0       | 29                                    | 24      | 17      |         | 27 CD166 antigen OS=Mus musculus GN=Alcam PE=1 SV=3                                                   |
| E9Q306      | 1.9445E-05     | 0                                 | 0       | 0       | 0       | 29                                    | 24      | 17      |         | 27 CD166 antigen OS=Mus musculus GN=Alcam PE=1 SV=1                                                   |
| E9Q468      | 1.9445E-05     | 0                                 | 0       | 0       | 0       | 29                                    | 24      | 17      |         | 27 CD166 antigen OS=Mus musculus GN=Alcam PE=1 SV=1                                                   |
| Q8VHX6      | 3.9976E-05     | 33                                | 28      | 33      | 10      | 199                                   | 155     | 116     |         | 162 Filamin-C OS=Mus musculus GN=Flnc PE=1 SV=3                                                       |
| Q5SUW3      | 7.1174E-05     | 0                                 | 0       | 0       | 0       | 6                                     | 5       | 4       |         | 5 Growth factor receptor-bound protein 10 OS=Mus musculus GN=Grb10 PE=1 SV=1                          |
| Q60760      | 7.1174E-05     | 0                                 | 0       | 0       | 0       | 6                                     | 5       | 4       |         | 5 Growth factor receptor-bound protein 10 OS=Mus musculus GN=Grb10 PE=1 SV=2                          |
| P26618      | 7.3818E-05     | 0                                 | 0       | 0       | 0       | 13                                    | 10      | 7       |         | 10 Platelet-derived growth factor receptor alpha OS=Mus musculus GN=Pdgfra PE=1 SV=3                  |
| O35295      | 9.8879E-05     | 0                                 | 0       | 0       | 0       | 7                                     | 6       | 5       |         | 7 Transcriptional activator protein Pur-beta OS=Mus musculus GN=Parb PE=1 SV=3                        |
| O35474      | 1.0574E-04     | 0                                 | 0       | 0       | 0       | 15                                    | 11      | 10      |         | 13 EGF-like repeat and discoidin I-like domain-containing protein 3 OS=Mus musculus GN=Edi3 PE=1 SV=2 |
| Q8C4U8      | 1.0574E-04     | 0                                 | 0       | 0       | 0       | 15                                    | 11      | 10      |         | 13 EGF-like repeat and discoidin I-like domain-containing protein 3 OS=Mus musculus GN=Edi3 PE=1 SV=1 |
| Q80YX1      | 1.2499E-04     | 0                                 | 0       | 0       | 0       | 71                                    | 62      | 49      |         | 75 Tenascin OS=Mus musculus GN=Tnc PE=1 SV=1                                                          |
| R08775      | 1.3897E-04     | 34                                | 31      | 29      | 10      | 6                                     | 6       | 2       |         | 7 DNA-directed RNA polymerase II subunit RPB1 OS=Mus musculus GN=Polr2a PE=1 SV=3                     |
| AA0A0R40V5  | 1.3897E-04     | 34                                | 31      | 29      | 10      | 6                                     | 6       | 2       |         | 7 DNA-directed RNA polymerase subunit OS=Mus musculus GN=Polr2a PE=1 SV=1                             |
| D3YUQ9      | 1.6781E-04     | 2                                 | 0       | 5       | 0       | 12                                    | 7       | 9       |         | 9 Elongation factor 1-delta (Fragment) OS=Mus musculus GN=Eef1d PE=1 SV=8                             |
| P13020      | 1.9109E-04     | 21                                | 15      | 18      | 5       | 46                                    | 38      | 29      |         | 43 Gelsolin OS=Mus musculus GN=Gsn PE=1 SV=3                                                          |
| E9QXS1      | 2.0287E-04     | 21                                | 16      | 21      | 5       | 192                                   | 148     | 109     |         | 138 Plectin OS=Mus musculus GN=Plec PE=1 SV=3                                                         |
| E9Q3W4      | 2.0309E-04     | 21                                | 15      | 20      | 5       | 191                                   | 148     | 108     |         | 138 Plectin OS=Mus musculus GN=Plec PE=1 SV=1                                                         |
| Q05D1V      | 2.0416E-04     | 24                                | 19      | 25      | 7       | 0                                     | 0       | 0       |         | 0 NADPH-cytochrome P450 reductase OS=Mus musculus GN=Por PE=1 SV=1                                    |
| Q04857      | 2.0775E-04     | 0                                 | 0       | 0       | 0       | 23                                    | 19      | 14      |         | 17 Collagen alpha-1(VI) chain OS=Mus musculus GN=Cofal PE=1 SV=1                                      |
| Q6P111      | 2.0775E-04     | 0                                 | 0       | 0       | 0       | 19                                    | 18      | 12      |         | 16 Crmp1 protein OS=Mus musculus GN=Crmp1 PE=1 SV=1                                                   |
| E9Q1T9      | 2.5822E-04     | 73                                | 50      | 56      | 17      | 24                                    | 19      | 13      |         | 22 Exportin-2 OS=Mus musculus GN=Cse11 PE=1 SV=1                                                      |
| E9PX23      | 2.8060E-04     | 8                                 | 4       | 4       | 2       | 3                                     | 0       | 0       |         | 3 Metastasis-associated protein MTA1 OS=Mus musculus GN=Mta1 PE=1 SV=1                                |
| Q8K4B0      | 2.8060E-04     | 8                                 | 4       | 4       | 2       | 3                                     | 0       | 0       |         | 3 Metastasis-associated protein MTA1 OS=Mus musculus GN=Mta1 PE=1 SV=1                                |
| FWHY8       | 2.8060E-04     | 8                                 | 4       | 4       | 2       | 3                                     | 0       | 0       |         | 3 Metastasis-associated protein MTA1 OS=Mus musculus GN=Mta1 PE=1 SV=1                                |
| Q9WV92      | 2.8565E-04     | 0                                 | 4       | 0       | 0       | 48                                    | 51      | 29      |         | 48 Band 4.1-like protein 3 OS=Mus musculus GN=Epb41b3 PE=1 SV=1                                       |
| Q62351      | 2.9072E-04     | 106                               | 72      | 82      | 24      | 5                                     | 5       | 4       |         | 10 Transferrin receptor protein 1 OS=Mus musculus GN=Tfrc PE=1 SV=1                                   |
| MOQWP1      | 3.0775E-04     | 44                                | 32      | 44      | 5       | 98                                    | 72      | 66      |         | 69 Agrin OS=Mus musculus GN=Agrn PE=1 SV=1                                                            |
| AA01B0GRI1  | 3.1153E-04     | 24                                | 23      | 22      | 7       | 0                                     | 0       | 0       |         | 0 Transaldolase OS=Mus musculus GN=Taldo1 PE=1 SV=1                                                   |
| Q93092      | 3.1153E-04     | 24                                | 23      | 22      | 7       | 0                                     | 0       | 0       |         | 0 Transaldolase OS=Mus musculus GN=Taldo1 PE=1 SV=2                                                   |
| P23116      | 3.3446E-04     | 69                                | 48      | 55      | 19      | 55                                    | 36      | 31      |         | 49 Eukaryotic translation initiation factor 3 subunit A OS=Mus musculus GN=Eif3a PE=1 SV=5            |
| P51655      | 3.9203E-04     | 0                                 | 0       | 0       | 0       | 35                                    | 22      | 20      |         | 25 Glycican-4 OS=Mus musculus GN=Gpc4 PE=1 SV=2                                                       |
| Q9CYN9      | 4.1823E-04     | 17                                | 15      | 18      | 6       | 0                                     | 0       | 0       |         | 0 Retin receptor OS=Mus musculus GN=Atp6ap2 PE=1 SV=2                                                 |
| D3ZSN9      | 4.7416E-04     | 10                                | 8       | 8       | 3       | 0                                     | 0       | 0       |         | 3 MCG49198 OS=Mus musculus GN=Gm5449 PE=1 SV=1                                                        |
| D3Z1J5      | 5.0864E-04     | 0                                 | 0       | 0       | 0       | 4                                     | 3       | 3       |         | 4 Palladin (Fragment) OS=Mus musculus GN=Palld PE=1 SV=1                                              |
| Q9ERK4      | 5.4543E-04     | 77                                | 53      | 58      | 17      | 24                                    | 19      | 13      |         | 22 Exportin-2 OS=Mus musculus GN=Cse11 PE=1 SV=1                                                      |
| P62897      | 5.4606E-04     | 0                                 | 0       | 0       | 0       | 17                                    | 13      | 8       |         | 12 Cytochrome c, somatic OS=Mus musculus GN=Cycs PE=1 SV=2                                            |
| P43274      | 5.5510E-04     | 42                                | 25      | 30      | 11      | 2                                     | 2       | 0       |         | 0 Histone H1.4 OS=Mus musculus GN=Hst1h1e PE=1 SV=2                                                   |
| P26653      | 5.7413E-04     | 0                                 | 0       | 0       | 0       | 35                                    | 21      | 19      |         | 31 Btglycam OS=Mus musculus GN=Bgn PE=1 SV=1                                                          |
| AA01LDSRMD8 | 5.8640E-04     | 0                                 | 7       | 7       | 3       | 0                                     | 0       | 0       |         | 4 CCR4-NOT transcription complex subunit 1 OS=Mus musculus GN=Cnot1 PE=1 SV=1                         |
| Q9AWT5      | 6.3792E-04     | 0                                 | 0       | 0       | 0       | 4                                     | 3       | 2       |         | 4 Nuclear factor NF-kappa-B p100 subunit OS=Mus musculus GN=Nfkb2 PE=1 SV=1                           |
| Q8BFY9      | 6.3906E-04     | 32                                | 22      | 24      | 11      | 10                                    | 7       | 6       |         | 14 Transportin-1 OS=Mus musculus GN=Tnpo1 PE=1 SV=2                                                   |
| Q9EQH3      | 6.4096E-04     | 50                                | 45      | 46      | 15      | 31                                    | 30      | 23      |         | 35 Vacuolar protein sorting-associated protein 35 OS=Mus musculus GN=Vps35 PE=1 SV=1                  |
| Q62009      | 6.4439E-04     | 0                                 | 0       | 0       | 0       | 37                                    | 24      | 17      |         | 25 Periostin OS=Mus musculus GN=Postn PE=1 SV=2                                                       |
| P97927      | 6.5484E-04     | 0                                 | 0       | 0       | 0       | 34                                    | 29      | 17      |         | 34 Laminin subunit alpha-4 OS=Mus musculus GN=Lama4 PE=1 SV=2                                         |
| Q61656      | 6.9064E-04     | 52                                | 37      | 45      | 11      | 13                                    | 9       | 5       |         | 8 Probable ATP-dependent RNA helicase DDX5 OS=Mus musculus GN=Ddx5 PE=1 SV=2                          |
| Q99J09      | 7.1787E-04     | 13                                | 11      | 12      | 5       | 4                                     | 4       | 4       |         | 7 Methylosome protein 50 OS=Mus musculus GN=Wdr77 PE=1 SV=1                                           |
| Q9DAW6      | 7.3271E-04     | 32                                | 29      | 28      | 8       | 23                                    | 21      | 14      |         | 15 U4U6 small nuclear ribonucleoprotein Prp4 OS=Mus musculus GN=Prp4 PE=1 SV=1                        |
| E9QA16      | 7.4994E-04     | 0                                 | 0       | 0       | 0       | 29                                    | 24      | 22      |         | 23 Protein Calb1 OS=Mus musculus GN=Calb1 PE=1 SV=1                                                   |
| J3KMQ2      | 7.5028E-04     | 24                                | 34      | 42      | 14      | 19                                    | 21      | 16      |         | 22 Protein Gm5422 OS=Mus musculus GN=Gm5422 PE=1 SV=1                                                 |
| P14824      | 7.8030E-04     | 123                               | 76      | 95      | 31      | 212                                   | 169     | 122     |         | 199 Annexin A6 OS=Mus musculus GN=Anxa6 PE=1 SV=3                                                     |
| Q80W65      | 7.9849E-04     | 15                                | 10      | 13      | 5       | 0                                     | 0       | 0       |         | 0 Proprotein convertase subtilisin/kexin type 9 OS=Mus musculus GN=Pesk9 PE=1 SV=2                    |
| Q8VCQ8      | 8.0820E-04     | 0                                 | 0       | 0       | 0       | 29                                    | 23      | 22      |         | 23 Caldesmon 1 OS=Mus musculus GN=Cald1 PE=1 SV=1                                                     |
| P14094      | 8.1480E-04     | 18                                | 20      | 22      | 7       | 5                                     | 8       | 7       |         | 7 Sodium/potassium-transporting ATPase subunit beta-1 OS=Mus musculus GN=Atp1b1 PE=1 SV=1             |
| AA0AG2JGD2  | 8.4487E-04     | 0                                 | 0       | 0       | 0       | 5                                     | 5       | 3       |         | 4 Protein S100-A4 (Fragment) OS=Mus musculus GN=S100a4 PE=1 SV=1                                      |
| P07091      | 8.4487E-04     | 0                                 | 0       | 0       | 0       | 5                                     | 5       | 3       |         | 4 Protein S100-A4 OS=Mus musculus GN=S100a4 PE=1 SV=1                                                 |
| P46935      | 8.8205E-04     | 7                                 | 4       | 4       | 2       | 36                                    | 23      | 23      |         | 35 E3 ubiquitin-protein ligase NEDD4 OS=Mus musculus GN=Nedd4 PE=1 SV=3                               |
| O70318      | 9.0735E-04     | 7                                 | 6       | 3       | 2       | 41                                    | 37      | 27      |         | 49 Band 4.1-like protein 2 OS=Mus musculus GN=Epb41b2 PE=1 SV=2                                       |
| P37040      | 9.2125E-04     | 24                                | 19      | 28      | 7       | 0                                     | 0       | 0       |         | 0 NADPH-cytochrome P450 reductase OS=Mus musculus GN=Por PE=1 SV=2                                    |
| P37889      | 9.4862E-04     | 0                                 | 7       | 7       | 3       | 0                                     | 0       | 0       |         | 62 Fibronectin OS=Mus musculus GN=Fn2 PE=1 SV=2                                                       |
| P30285      | 9.9508E-04     | 12                                | 13      | 15      | 4       | 7                                     | 4       | 4       |         | 4 Cyclin-dependent kinase 4 OS=Mus musculus GN=Cdk4 PE=1 SV=1                                         |
| P11983      | 9.9369E-04     | 158                               | 128     | 147     | 48      | 99                                    | 79      | 55      |         | 81 T-complex protein 1 subunit alpha OS=Mus musculus GN=Tcp1 PE=1 SV=3                                |
| P26516      | 1.0206E-03     | 25                                | 24      | 23      | 10      | 13                                    | 12      | 9       |         | 20 26S proteasome non-ATPase regulatory subunit 7 OS=Mus musculus GN=Psm7 PE=1 SV=2                   |
| Q01320      | 1.0239E-03     | 63                                | 49      | 49      | 22      | 0                                     | 0       | 0       |         | 0 DNA topoisomerase 2-alpha OS=Mus musculus GN=Top2a PE=1 SV=2                                        |
| P60766      | 1.0399E-03     | 26                                | 22      | 22      | 7       | 82                                    | 63      | 48      |         | 57 Cell division control protein 42 homolog OS=Mus musculus GN=Cdc42 PE=1 SV=2                        |
| Q99P88      | 1.0467E-03     | 8                                 | 7       | 7       | 3       | 0                                     | 0       | 0       |         | 0 Nuclear pore complex protein Nup155 OS=Mus musculus GN=Nup155 PE=1 SV=1                             |
| Q922D8      | 1.0701E-03     | 87                                | 70      | 76      | 24      | 62                                    | 54      | 40      |         | 48 C-1-tetrahydrofolate synthase, cytoplasmic OS=Mus musculus GN=Mthfd1 PE=1 SV=4                     |
| AA0A09YU9E  | 1.1716E-03     | 0                                 | 0       | 0       | 0       | 10                                    | 6       | 6       |         | 10 Dynamin-1 OS=Mus musculus GN=Dnm1 PE=1 SV=1                                                        |
| P54728      | 1.1768E-03     | 0                                 | 0       | 0       | 0       | 8                                     | 7       | 7       |         | 8 UV excision repair protein RAD23 homolog B OS=Mus musculus GN=Rad23b PE=1 SV=2                      |
| Q990E1      | 1.1799E-03     | 19                                | 17      | 10      | 11      | 11                                    | 8       | 8       |         | 4 Procollagen-lysin-2 OS=Mus musculus GN=Plod3 PE=1 SV=1                                              |
| P47962      | 1.1958E-03     | 140                               | 124     | 127     | 57      | 45                                    | 23      | 30      |         | 79 60S ribosomal protein L5 OS=Mus musculus GN=Rpl5 PE=1 SV=3                                         |
| Q922V5      | 1.2249E-03     | 5                                 | 5       | 6       | 2       | 0                                     | 0       | 0       |         | 0 Histone deacetylase 6 OS=Mus musculus GN=Hdac6 PE=1 SV=3                                            |
| AA01B0GX25  | 1.2249E-03     | 5                                 | 5       | 6       | 2       | 0                                     | 0       | 0       |         | 0 Histone deacetylase 6 (Fragment) OS=Mus musculus GN=Hdac6 PE=1 SV=1                                 |
| Q8KZ24      | 1.2315E-03     | 6                                 | 8       | 5       | 2       | 0                                     | 2       | 0       |         | 0 Condensin complex subunit 1 OS=Mus musculus GN=Ncapd2 PE=1 SV=2                                     |
| AA0A0R40H17 | 1.2315E-03     | 6                                 | 8       | 5       | 2       | 0                                     | 2       | 0       |         | 0 Condensin complex subunit 1 OS=Mus musculus GN=Ncapd2 PE=1 SV=1                                     |
| Q80X90      | 1.2448E-03     | 51                                | 26      | 45      | 7       | 163                                   | 151     | 101     |         | 135 Filamin-B OS=Mus musculus GN=Flnb PE=1 SV=3                                                       |
| Q810B6      | 1.2681E-03     | 5                                 | 5       | 5       | 2       | 0                                     | 0       | 0       |         | 0 Rabankyrin-5 OS=Mus musculus GN=Ankfy1 PE=1 SV=2                                                    |
| P42932      | 1.2940E-03     | 192                               | 152     | 151     | 45      | 114                                   | 107     | 74      |         | 102 T-complex protein 1 subunit theta OS=Mus musculus GN=Cct8 PE=1 SV=3                               |
| G3XA35      | 1.3870E-03     | 0                                 | 0       | 0       | 0       | 12                                    | 9       | 6       |         | 7 MCG116562, isoform CRA_a OS=Mus musculus GN=Vcan PE=1 SV=1                                          |
| E9P1H0      | 1.3870E-03     | 0                                 | 0       | 0       | 0       | 12                                    | 9       | 6       |         | 7 Vimentin core protein OS=Mus musculus GN=Vcan PE=1 SV=1                                             |
| Q61739      | 1.3996E-03     | 36                                | 26      | 26      | 9       | 6                                     | 6       | 7       |         | 5 Integrin alpha-6 OS=Mus musculus GN=Itga6 PE=1 SV=3                                                 |
| P10518      | 1.4062E-03     | 0                                 | 0       | 0       | 0       | 8                                     | 9       | 7       |         | 8 Delta-aminolevulinic acid dehydratase OS=Mus musculus GN=Alad PE=1 SV=1                             |
| P10107      | 1.4120E-03     | 90                                | 73      | 70      | 26      | 229                                   | 152     | 129     |         | 205 Annexin A1 OS=Mus musculus GN=Anxa1 PE=1 SV=2                                                     |
| B7ZCU0      | 1.4258E-03     | 0                                 | 2       | 4       | 0       | 4                                     | 7       | 6       |         | 4 Abl interactor 1 OS=Mus musculus GN=Abl1 PE=1 SV=1                                                  |
| B7ZCU2      | 1.4258E-03     | 0                                 | 2       | 4       | 0       | 4                                     | 7       | 6       |         | 4 Abl interactor 1 OS=Mus musculus GN=Abl1 PE=1 SV=1                                                  |
| B7ZCU3      | 1.4258E-03     | 0                                 | 2       | 4       | 0       | 4                                     | 7       | 6       |         | 4 Abl interactor 1 OS=Mus musculus GN=Abl1 PE=1 SV=1                                                  |
| B7ZCU4      | 1.4258E-03     | 0                                 | 2       | 4       | 0       | 4                                     | 7       | 6       |         | 4 Abl interactor 1 OS=Mus musculus GN=Abl1 PE=1 SV=1                                                  |
| B7ZCU5      | 1.4258E-03     | 0                                 | 2       | 4       | 0       | 4                                     | 7       | 6       |         | 4 Abl interactor 1 OS=Mus musculus GN=Abl1 PE=1 SV=1                                                  |
| Q8CBW3      | 1.4258E-03     | 0                                 | 2       | 4       | 0       | 4                                     | 7       | 6       |         | 4 Abl interactor 1 OS=Mus musculus GN=Abl1 PE=1 SV=3                                                  |
| J3QNK8      | 1.4258E-03     | 0                                 | 2       | 4       | 0       | 4                                     | 7       | 6       |         | 4 Abl interactor 1 OS=Mus musculus GN=Abl1 PE=1 SV=1                                                  |
| Q9CSH3      | 1.4274E-03     | 40                                | 33      | 49      | 12      | 0                                     | 0       | 0       |         | 2 Exosome complex exomeclease RRP44 OS=Mus musculus GN=Dix3 PE=1 SV=4                                 |
| Q6P069      | 1.4303E-03     | 0                                 | 0       | 0       | 0       | 12                                    | 11      | 8       |         | 8 Sorcin OS=Mus musculus GN=Srn1 PE=1 SV=1                                                            |
| Q9Z1T1      | 1.4330E-03     | 9                                 | 7       | 11      | 3       | 0                                     | 0       | 0       |         | 0 AP-3 complex subunit beta-1 OS=Mus musculus GN=Ap3b1 PE=1 SV=2                                      |
| P18872      | 1.4805E-03     | 0                                 | 0       | 0       | 0       | 26                                    | 22      | 13      |         | 29 Guanine nucleotide-binding protein G(o) subunit alpha OS=Mus musculus GN=Gnao1 PE=1 SV=3           |
| Q9CZU3      | 1.4958E-03     | 16                                | 16      | 21      | 7       | 0                                     | 3       | 3       |         | 2 Supercell viralicity activity 2-like 2 OS=Mus musculus GN=Skiv2l2 PE=1 SV=1                         |
| F6QTS1      | 1.4984E-03     | 15                                | 6       | 10      | 3       | 3                                     | 0       | 0       |         | 0 COP9 signalosome complex subunit 4 (Fragment) OS=Mus musculus GN=Cops4 PE=1 SV=1                    |
| Q02248      | 1.5575E-03     | 12                                | 11      | 13      | 4       | 50                                    | 35      | 25      |         | 38 Catenin beta-1 OS=Mus musculus GN=Ctnb1 PE=1 SV=1                                                  |
| P19001      | 1.5702E-03     | 16                                | 10      | 17      | 4       | 0                                     | 0       | 0       |         | 0 Keratin, type I cytoskeletal 19 OS=Mus musculus GN=Krt19 PE=1 SV=1                                  |
| R08314      | 1.5821E-03     | 217                               | 145     | 230     | 79      | 76                                    | 70      |         |         |                                                                                                       |

|            |            |     |     |     |     |      |     |     |     |                                                                                                                      |
|------------|------------|-----|-----|-----|-----|------|-----|-----|-----|----------------------------------------------------------------------------------------------------------------------|
| P43277     | 2.6189E-03 | 36  | 24  | 33  | 13  | 2    | 2   | 0   | 0   | Histone H1.3 OS=Mus musculus GN=H1h1d PE=1 SV=2                                                                      |
| P15864     | 2.6189E-03 | 36  | 24  | 33  | 13  | 2    | 2   | 0   | 0   | Histone H1.2 OS=Mus musculus GN=H1h1c PE=1 SV=2                                                                      |
| D3Z2H12    | 2.6231E-03 | 0   | 5   | 4   | 2   | 27   | 18  | 17  | 26  | Catenin delta-1 OS=Mus musculus GN=Ctndd1 PE=1 SV=1                                                                  |
| E9QKZ8     | 2.6231E-03 | 0   | 5   | 4   | 2   | 27   | 18  | 17  | 26  | Catenin delta-1 OS=Mus musculus GN=Ctndd1 PE=1 SV=1                                                                  |
| Q7TPR4     | 2.7395E-03 | 28  | 26  | 25  | 10  | 94   | 79  | 47  | 84  | Alpha-actinin-1 OS=Mus musculus GN=Actn1 PE=1 SV=1                                                                   |
| Q61553     | 2.7536E-03 | 0   | 0   | 0   | 0   | 85   | 107 | 89  | 111 | Fascin OS=Mus musculus GN=Fscn1 PE=1 SV=4                                                                            |
| A2AZS7     | 2.7550E-03 | 3   | 0   | 4   | 0   | 0    | 11  | 9   | 10  | Tyrosine-tRNA ligase OS=Mus musculus GN=Mars PE=1 SV=1                                                               |
| Q91WQ3     | 2.7550E-03 | 3   | 0   | 4   | 0   | 0    | 11  | 9   | 10  | Tyrosine-tRNA ligase, cytoplasmic OS=Mus musculus GN=Yars PE=1 SV=3                                                  |
| Q9EPL8     | 2.7980E-03 | 18  | 16  | 18  | 8   | 0    | 5   | 0   | 5   | Importin-7 OS=Mus musculus GN=Imp7 PE=1 SV=2                                                                         |
| G3UXG7     | 2.8867E-03 | 0   | 0   | 0   | 0   | 5    | 5   | 5   | 5   | Casein kinase II subunit beta OS=Mus musculus GN=Cskn2b PE=1 SV=1                                                    |
| P67871     | 2.8867E-03 | 0   | 0   | 0   | 0   | 5    | 5   | 5   | 5   | Casein kinase II subunit beta OS=Mus musculus GN=Cskn2b PE=1 SV=1                                                    |
| Q3TXS7     | 2.9106E-03 | 42  | 38  | 31  | 11  | 23   | 19  | 13  | 18  | 26S proteasome non-ATPase regulatory subunit 1 OS=Mus musculus GN=Psm2l1 PE=1 SV=1                                   |
| P02468     | 2.9437E-03 | 35  | 32  | 33  | 9   | 103  | 96  | 53  | 77  | Laminin subunit gamma-1 OS=Mus musculus GN=Lamc1 PE=1 SV=2                                                           |
| O35566     | 2.9482E-03 | 44  | 44  | 61  | 13  | 0    | 0   | 0   | 0   | CD151 antigen OS=Mus musculus GN=Cd151 PE=1 SV=2                                                                     |
| P62317     | 3.0055E-03 | 10  | 8   | 8   | 3   | 0    | 0   | 2   | 3   | Small nuclear ribonucleoprotein Sm D2 OS=Mus musculus GN=Snrpd2 PE=1 SV=1                                            |
| H3B1P2     | 3.0555E-03 | 52  | 44  | 40  | 7   | 21   | 22  | 19  | 0   | S-formylglutathione hydrolase (Fragment) OS=Mus musculus GN=Fsgh PE=1 SV=1                                           |
| Q8VDM4     | 3.0742E-03 | 89  | 59  | 70  | 25  | 38   | 39  | 39  | 49  | 26S proteasome non-ATPase regulatory subunit 2 OS=Mus musculus GN=Psm2l2 PE=1 SV=1                                   |
| A0A1B0GRG3 | 3.1216E-03 | 41  | 42  | 59  | 13  | 0    | 0   | 0   | 0   | CD151 antigen (Fragment) OS=Mus musculus GN=Cd151 PE=1 SV=1                                                          |
| F6YY69     | 3.1822E-03 | 89  | 81  | 76  | 40  | 23   | 26  | 29  | 67  | 14-3-3 protein theta (Fragment) OS=Mus musculus GN=Ywhaq PE=1 SV=1                                                   |
| F8WIT2     | 3.2005E-03 | 132 | 80  | 104 | 32  | 219  | 180 | 123 | 210 | Annexin OS=Mus musculus GN=Anxa6 PE=1 SV=1                                                                           |
| P27601     | 3.2321E-03 | 2   | 2   | 0   | 0   | 8    | 10  | 5   | 9   | Guanine nucleotide-binding protein subunit alpha-13 OS=Mus musculus GN=Gna13 PE=1 SV=1                               |
| E9Q6R7     | 3.2437E-03 | 0   | 0   | 2   | 0   | 6    | 3   | 5   | 6   | Protein Utm OS=Mus musculus GN=Utm PE=1 SV=1                                                                         |
| D3Z4A4     | 3.2649E-03 | 0   | 0   | 0   | 0   | 27   | 18  | 9   | 0   | Peroxiredoxin-2 (Fragment) OS=Mus musculus GN=Prdx2 PE=1 SV=8                                                        |
| QR8480     | 3.3172E-03 | 7   | 4   | 8   | 2   | 0    | 0   | 0   | 0   | Nuclear pore complex protein Nup85 OS=Mus musculus GN=Nup85 PE=1 SV=1                                                |
| D3XYX6     | 3.3397E-03 | 0   | 0   | 0   | 0   | 4    | 5   | 3   | 6   | Glutathione S-transferase OS=Mus musculus GN=Gstm2 PE=1 SV=1                                                         |
| P15626     | 3.3397E-03 | 0   | 0   | 0   | 0   | 4    | 5   | 3   | 6   | Glutathione S-transferase Mu 2 OS=Mus musculus GN=Gstm2 PE=1 SV=2                                                    |
| Q5XSX6     | 3.3435E-03 | 414 | 294 | 302 | 96  | 189  | 174 | 129 | 202 | Citron heavy chain OS=Mus musculus GN=Clec PE=1 SV=1                                                                 |
| O88477     | 3.3787E-03 | 5   | 2   | 3   | 0   | 15   | 10  | 7   | 5   | Insulin-like growth factor 2 mRNA-binding protein 1 OS=Mus musculus GN=Igf2bp1 PE=1 SV=1                             |
| Q5SQBS     | 3.4491E-03 | 58  | 34  | 35  | 13  | 27   | 17  | 15  | 19  | Nucleophosmin OS=Mus musculus GN=Npm1 PE=1 SV=1                                                                      |
| P16125     | 3.4578E-03 | 0   | 0   | 0   | 0   | 11   | 13  | 12  | 13  | L-lactate dehydrogenase B chain OS=Mus musculus GN=Ldhb PE=1 SV=2                                                    |
| A0A087WS16 | 3.5044E-03 | 0   | 0   | 0   | 0   | 25   | 18  | 9   | 15  | Protein Col6a3 OS=Mus musculus GN=Col6a3 PE=1 SV=1                                                                   |
| Q9DC44     | 3.5735E-03 | 0   | 0   | 0   | 0   | 5    | 3   | 4   | 4   | Pyruvate-5-carboxylate reductase 3 OS=Mus musculus GN=Pycr1 PE=1 SV=2                                                |
| Q5SS83     | 3.6049E-03 | 0   | 0   | 0   | 0   | 8    | 4   | 5   | 5   | Flotillin 2, isoform CRA_a OS=Mus musculus GN=Flot2 PE=1 SV=1                                                        |
| Q60634     | 3.6049E-03 | 0   | 0   | 0   | 0   | 8    | 4   | 5   | 5   | Flotillin 2 OS=Mus musculus GN=Flot2 PE=1 SV=2                                                                       |
| Q8C168     | 3.7007E-03 | 16  | 15  | 12  | 5   | 8    | 11  | 4   | 13  | Protein arginine N-methyltransferase 5 OS=Mus musculus GN=Prmt5 PE=1 SV=3                                            |
| P18760     | 3.7241E-03 | 67  | 60  | 67  | 17  | 134  | 96  | 67  | 108 | Cofilin-1 OS=Mus musculus GN=Cfl1 PE=1 SV=3                                                                          |
| F6VX30     | 3.7286E-03 | 89  | 84  | 74  | 41  | 26   | 26  | 29  | 67  | 14-3-3 protein theta (Fragment) OS=Mus musculus GN=Ywhaq PE=1 SV=1                                                   |
| P90999     | 3.7519E-03 | 0   | 5   | 4   | 2   | 27   | 17  | 17  | 27  | Catenin delta-1 OS=Mus musculus GN=Ctndd1 PE=1 SV=2                                                                  |
| E9Q905     | 3.7519E-03 | 0   | 5   | 4   | 2   | 27   | 17  | 17  | 27  | Catenin delta-1 OS=Mus musculus GN=Ctndd1 PE=1 SV=1                                                                  |
| A0A067XG53 | 3.7689E-03 | 0   | 0   | 0   | 0   | 8    | 8   | 6   | 5   | Peripheral plasma membrane protein CASK (Fragment) OS=Mus musculus GN=Cask PE=1 SV=1                                 |
| O70589     | 3.7689E-03 | 0   | 0   | 0   | 0   | 8    | 8   | 6   | 5   | Peripheral plasma membrane protein CASK OS=Mus musculus GN=Cask PE=1 SV=2                                            |
| A2AW05     | 3.7811E-03 | 6   | 3   | 5   | 2   | 0    | 0   | 0   | 0   | FACT complex subunit SSRP1 (Fragment) OS=Mus musculus GN=Ssrp1 PE=1 SV=1                                             |
| Q08943     | 3.7811E-03 | 6   | 3   | 5   | 2   | 0    | 0   | 0   | 0   | FACT complex subunit SSRP1 OS=Mus musculus GN=Ssrp1 PE=1 SV=2                                                        |
| E9Q904     | 3.8046E-03 | 0   | 5   | 4   | 2   | 27   | 17  | 17  | 26  | Catenin delta-1 OS=Mus musculus GN=Ctndd1 PE=1 SV=1                                                                  |
| F8WGL3     | 3.8699E-03 | 67  | 60  | 61  | 17  | 132  | 95  | 86  | 108 | Cofilin-1 OS=Mus musculus GN=Cfl1 PE=1 SV=1                                                                          |
| Q68FL6     | 3.9447E-03 | 56  | 33  | 46  | 11  | 11   | 10  | 5   | 12  | Methionine-tRNA ligase, cytoplasmic OS=Mus musculus GN=Mars PE=1 SV=1                                                |
| E9QB02     | 3.9447E-03 | 56  | 33  | 46  | 11  | 11   | 10  | 5   | 12  | Methionine-tRNA ligase, cytoplasmic OS=Mus musculus GN=Mars PE=1 SV=1                                                |
| P40661     | 3.9649E-03 | 24  | 20  | 13  | 6   | 2    | 2   | 0   | 0   | Ran GTPase-activating protein 1 OS=Mus musculus GN=Rangap1 PE=1 SV=2                                                 |
| E9QKRO     | 3.9684E-03 | 120 | 97  | 86  | 37  | 42   | 38  | 36  | 55  | Guanine nucleotide-binding protein G(I)G(S)G(T) subunit beta-2 OS=Mus musculus GN=Gnb2 PE=1 SV=1                     |
| P11152     | 4.0176E-03 | 0   | 0   | 0   | 0   | 19   | 8   | 10  | 13  | Lipoprotein lipase OS=Mus musculus GN=Lpl PE=1 SV=3                                                                  |
| P62880     | 4.0316E-03 | 121 | 97  | 86  | 37  | 42   | 38  | 36  | 55  | Guanine nucleotide-binding protein G(I)G(S)G(T) subunit beta-2 OS=Mus musculus GN=Gnb2 PE=1 SV=3                     |
| P58854     | 4.0334E-03 | 4   | 5   | 6   | 2   | 0    | 0   | 0   | 0   | Gamma-tubulin complex component 3 OS=Mus musculus GN=Tabgp3 PE=1 SV=2                                                |
| A0A0N4SVS6 | 4.0425E-03 | 4   | 4   | 0   | 0   | 26   | 19  | 14  | 11  | Cellular nucleic acid-binding protein OS=Mus musculus GN=Cnbp PE=1 SV=1                                              |
| P68037     | 4.1297E-03 | 2   | 3   | 0   | 0   | 8    | 8   | 5   | 4   | Ubiquitin-conjugating enzyme E2 L3 OS=Mus musculus GN=Ube2l3 PE=1 SV=1                                               |
| Q6P5D8     | 4.1758E-03 | 17  | 9   | 17  | 6   | 0    | 0   | 0   | 0   | Structural maintenance of chromosomes flexible hinge domain-containing protein 1 OS=Mus musculus GN=Smchd1 PE=1 SV=2 |
| Q88FD5     | 4.1908E-03 | 416 | 294 | 302 | 95  | 189  | 175 | 130 | 204 | Citron heavy chain 1 OS=Mus musculus GN=Clec PE=1 SV=3                                                               |
| A2AN08     | 4.2293E-03 | 26  | 24  | 34  | 6   | 12   | 17  | 14  | 11  | E3 ubiquitin-protein ligase UBR4 OS=Mus musculus GN=Ubr4 PE=1 SV=1                                                   |
| A1BN54     | 4.2464E-03 | 28  | 26  | 24  | 10  | 89   | 72  | 37  | 78  | Alpha actinin 1a OS=Mus musculus GN=Actn1 PE=1 SV=1                                                                  |
| P81879     | 4.2633E-03 | 132 | 97  | 111 | 31  | 128  | 93  | 76  | 97  | Myosin-10 OS=Mus musculus GN=Myh10 PE=1 SV=2                                                                         |
| B1B1E2     | 4.2921E-03 | 0   | 0   | 0   | 0   | 4    | 6   | 4   | 5   | Latent-transforming growth factor beta-binding protein 1 (Fragment) OS=Mus musculus GN=Ltbp1 PE=1 SV=8               |
| Q8CG19     | 4.2921E-03 | 0   | 0   | 0   | 0   | 4    | 6   | 4   | 5   | Latent-transforming growth factor beta-binding protein 1 OS=Mus musculus GN=Ltbp1 PE=1 SV=2                          |
| P61937     | 4.2950E-03 | 59  | 34  | 35  | 13  | 27   | 18  | 15  | 19  | Nucleophosmin OS=Mus musculus GN=Npm1 PE=1 SV=1                                                                      |
| P58252     | 4.3118E-03 | 399 | 264 | 287 | 89  | 315  | 191 | 161 | 247 | Elongation factor 2 OS=Mus musculus GN=Ecf2 PE=1 SV=2                                                                |
| Q9ET54     | 4.3760E-03 | 0   | 0   | 0   | 0   | 6    | 8   | 7   | 8   | Palladin OS=Mus musculus GN=Palld PE=1 SV=2                                                                          |
| E9QN70     | 4.3834E-03 | 10  | 9   | 10  | 4   | 45   | 26  | 22  | 33  | Laminin subunit beta-1 OS=Mus musculus GN=Lamb1 PE=1 SV=1                                                            |
| P02469     | 4.3834E-03 | 10  | 9   | 10  | 4   | 45   | 26  | 22  | 33  | Laminin subunit beta-1 OS=Mus musculus GN=Lamb1 PE=1 SV=3                                                            |
| D3YVC1     | 4.4314E-03 | 123 | 103 | 109 | 46  | 24   | 30  | 20  | 86  | 40S ribosomal protein S2 (Fragment) OS=Mus musculus GN=Rps2 PE=1 SV=1                                                |
| Q9JHK4     | 4.4418E-03 | 10  | 8   | 7   | 4   | 0    | 0   | 0   | 0   | Geranyltransferase type-2 subunit alpha OS=Mus musculus GN=Rabgtg1 PE=1 SV=1                                         |
| BTF4V1     | 4.4552E-03 | 99  | 73  | 99  | 20  | 303  | 195 | 138 | 211 | Filamin, alpha (Fragment) OS=Mus musculus GN=Flna PE=1 SV=1                                                          |
| B7ZNU9     | 4.4711E-03 | 4   | 0   | 0   | 0   | 10   | 6   | 5   | 4   | Beta-2-syntrophin OS=Mus musculus GN=Sntb2 PE=2 SV=1                                                                 |
| P48428     | 4.5249E-03 | 0   | 0   | 0   | 0   | 11   | 5   | 5   | 6   | Tubulin-specific chaperone A OS=Mus musculus GN=Tba PE=1 SV=3                                                        |
| BTF4U9     | 4.5721E-03 | 99  | 73  | 99  | 20  | 304  | 195 | 138 | 212 | Filamin, alpha OS=Mus musculus GN=Flna PE=1 SV=1                                                                     |
| Q8BTM8     | 4.5721E-03 | 99  | 73  | 99  | 20  | 304  | 195 | 138 | 212 | Filamin-A OS=Mus musculus GN=Flna PE=1 SV=5                                                                          |
| Q8CGC7     | 4.5905E-03 | 164 | 134 | 131 | 39  | 69   | 68  | 51  | 85  | Bifunctional glutamate/proline-tRNA ligase OS=Mus musculus GN=Eprs PE=1 SV=4                                         |
| E9Q2A0     | 4.6097E-03 | 0   | 0   | 0   | 0   | 8    | 7   | 5   | 4   | EGF-containing fibulin-like extracellular matrix protein 2 (Fragment) OS=Mus musculus GN=Efemp2 PE=1 SV=1            |
| P12815     | 4.6137E-03 | 20  | 17  | 12  | 6   | 18   | 6   | 8   | 18  | Programmed cell death protein 6 OS=Mus musculus GN=Pdc6 PE=1 SV=2                                                    |
| P20152     | 4.7288E-03 | 46  | 33  | 39  | 14  | 157  | 96  | 66  | 127 | Vimentin OS=Mus musculus GN=Vim PE=1 SV=3                                                                            |
| Q9D2R0     | 4.7819E-03 | 8   | 2   | 5   | 0   | 16   | 12  | 12  | 13  | Acetylcoy-CoA synthetase OS=Mus musculus GN=Aacs PE=1 SV=1                                                           |
| E9Q634     | 4.8632E-03 | 6   | 5   | 8   | 2   | 0    | 0   | 0   | 0   | Unconventional myosin-1c OS=Mus musculus GN=Myo1c PE=1 SV=1                                                          |
| Q5SQB0     | 4.8659E-03 | 59  | 33  | 35  | 12  | 27   | 18  | 15  | 19  | Nucleophosmin OS=Mus musculus GN=Npm1 PE=1 SV=1                                                                      |
| A0A0R4J233 | 5.0844E-03 | 8   | 8   | 13  | 3   | 0    | 0   | 0   | 0   | Septin-10 OS=Mus musculus GN=Sept10 PE=1 SV=1                                                                        |
| Q8C650     | 5.0844E-03 | 8   | 8   | 13  | 3   | 0    | 0   | 0   | 0   | Septin-10 OS=Mus musculus GN=Sept10 PE=1 SV=1                                                                        |
| Q99K41     | 5.1092E-03 | 0   | 0   | 0   | 0   | 26   | 32  | 15  | 21  | EMILIN-1 OS=Mus musculus GN=Emilin1 PE=1 SV=1                                                                        |
| E9PXM6     | 5.1282E-03 | 0   | 6   | 8   | 0   | 0    | 10  | 10  | 7   | Equilibrative nucleoside transporter 1 OS=Mus musculus GN=Slc29a1 PE=1 SV=1                                          |
| E9PWQ3     | 5.1488E-03 | 0   | 0   | 0   | 0   | 29   | 22  | 11  | 15  | Protein Col6a3 OS=Mus musculus GN=Col6a3 PE=1 SV=2                                                                   |
| P62082     | 5.1578E-03 | 17  | 14  | 10  | 4   | 6    | 4   | 3   | 4   | 40S ribosomal protein S7 OS=Mus musculus GN=Rps7 PE=2 SV=1                                                           |
| P11214     | 5.1782E-03 | 14  | 9   | 10  | 6   | 0    | 0   | 0   | 2   | Tissue-type plasminogen activator OS=Mus musculus GN=Plat PE=1 SV=3                                                  |
| P68254     | 5.1927E-03 | 89  | 81  | 76  | 43  | 23   | 26  | 29  | 66  | 14-3-3 protein theta OS=Mus musculus GN=Ywhaq PE=1 SV=1                                                              |
| P26041     | 5.1949E-03 | 111 | 85  | 83  | 28  | 266  | 206 | 188 | 192 | Moesin OS=Mus musculus GN=Msn PE=1 SV=3                                                                              |
| Q9DBJ1     | 5.2862E-03 | 50  | 40  | 30  | 14  | 88   | 78  | 49  | 105 | Phosphoglycerate mutase 1 OS=Mus musculus GN=Pgam1 PE=1 SV=3                                                         |
| A0A140T8L5 | 5.2992E-03 | 126 | 104 | 101 | 46  | 33   | 25  | 39  | 94  | Protein Rps2-ps6 OS=Mus musculus GN=Rps2-ps6 PE=3 SV=1                                                               |
| D3Z2H16    | 5.3130E-03 | 0   | 5   | 4   | 2   | 27   | 16  | 17  | 27  | Catenin delta-1 OS=Mus musculus GN=Ctndd1 PE=1 SV=1                                                                  |
| E9QKZ4     | 5.3130E-03 | 0   | 5   | 4   | 2   | 27   | 16  | 17  | 27  | Catenin delta-1 OS=Mus musculus GN=Ctndd1 PE=1 SV=1                                                                  |
| O70433     | 5.3616E-03 | 0   | 0   | 0   | 0   | 5    | 7   | 5   | 9   | Four and a half LIM domains protein 2 OS=Mus musculus GN=Fhl2 PE=1 SV=1                                              |
| Q9WLU7     | 5.3885E-03 | 11  | 6   | 8   | 4   | 0    | 0   | 0   | 0   | Cathepsin Z OS=Mus musculus GN=Ctzb PE=1 SV=1                                                                        |
| Q9DBC7     | 5.4406E-03 | 4   | 3   | 5   | 0   | 16   | 22  | 17  | 20  | cAMP-dependent protein kinase type I-alpha regulatory subunit OS=Mus musculus GN=Pkrar1a PE=1 SV=3                   |
| E9PYB0     | 5.4576E-03 | 0   | 0   | 0   | 0   | 7    | 4   | 6   | 6   | Protein A202 (Fragment) OS=Mus musculus GN=A202 PE=1 SV=8                                                            |
| Q61753     | 5.6400E-03 | 87  | 66  | 69  | 18  | 81   | 57  | 42  | 43  | D-3-phosphoglycerate dehydrogenase OS=Mus musculus GN=Phgdh PE=1 SV=3                                                |
| S4R116     | 5.6499E-03 | 44  | 33  | 42  | 9   | 12   | 8   | 0   | 7   | MCG282, isoform CRA_b OS=Mus musculus GN=Ddk5 PE=1 SV=1                                                              |
| B1B0C7     | 5.7747E-03 | 470 | 369 | 367 | 154 | 1090 | 802 | 577 | 780 | Basement membrane-specific heparan sulfate proteoglycan core protein OS=Mus musculus GN=Hspg2 PE=1 SV=1              |
| Q9WVJ9     | 5.8766E-03 | 0   | 0   | 0   | 0   | 12   | 10  | 5   | 6   | EGF-containing fibulin-like extracellular matrix protein 2 OS=Mus musculus GN=Efemp2 PE=1 SV=1                       |
| G5EDB6     | 5.8766E-03 | 0   | 0   | 0   | 0   | 12   | 10  | 5   | 6   | EGF-containing fibulin-like extracellular matrix protein 2 OS=Mus musculus GN=Efemp2 PE=1 SV=1                       |
| Q9WTZ2     | 5.8946E-03 | 5   | 3   | 4   | 2   | 0    | 0   | 0   | 0   | Membrane-bound transcription factor site-1 protease OS=Mus musculus GN=Mtbsp1 PE=1 SV=1                              |
| Q61RU2     | 5.9680E-03 | 17  | 18  | 18  | 9   | 51   | 44  | 38  | 48  | Tropomyosin alpha-4 chain OS=Mus musculus GN=Tpm4 PE=1 SV=3                                                          |
| P10493     | 5.9969E-03 | 0   | 0   | 0   | 0   | 126  | 87  | 36  | 89  | Nidogen-1 OS=Mus musculus GN=Nid1 PE=1 SV=2                                                                          |
| Q62470     | 6.0487E-03 | 90  | 51  | 69  | 19  | 24   | 22  | 22  | 26  | Integrin alpha-3 OS=Mus musculus GN=Itga3 PE=1 SV=1                                                                  |
| Q9JHJ8     | 6.0895E-03 | 0   | 0   | 0   | 0   | 8    | 8   | 9   | 8   | SH3 domain-binding glutamic acid-rich-like protein OS=Mus musculus GN=Sh3bgl PE=1 SV=1                               |
| E9PZ16     | 6.1781E-03 | 480 | 373 | 373 | 159 | 1100 | 808 | 579 | 792 | Basement membrane-specific heparan sulfate proteoglycan core protein OS=Mus musculus GN=Hspg2 PE=1 SV=1              |
| Q9CQV8     | 6.2301E-03 | 73  | 54  | 58  | 34  | 29   | 21  | 24  | 58  | 14-3-3 protein beta/alpha OS=Mus musculus GN=Ywhab PE=1 SV=3                                                         |
| Q4FE56     | 6.2442E-03 | 47  | 46  | 41  | 13  | 16   | 13  | 11  | 24  | Probable ubiquitin carboxyl-terminal hydrolase FAF-X OS=Mus musculus GN=Usp9x PE=1 SV=1                              |
| P70398     | 6.2442E-03 |     |     |     |     |      |     |     |     |                                                                                                                      |



|                         |            |     |     |     |     |     |     |     |                                                                                                                       |
|-------------------------|------------|-----|-----|-----|-----|-----|-----|-----|-----------------------------------------------------------------------------------------------------------------------|
| A0A0R41G9               | 7.1305E-03 | 0   | 0   | 0   | 0   | 5   | 7   | 4   | 9 Metalloreductase STEAP3 OS=Mus musculus GN=Steap3 PE=1 SV=1                                                         |
| Q920C8                  | 7.2140E-03 | 7   | 4   | 3   | 2   | 0   | 0   | 0   | 0 Influenza virus NS1A-binding protein homolog OS=Mus musculus GN=Ivns1abp PE=1 SV=2                                  |
| Q9CWF2                  | 7.2181E-03 | 307 | 196 | 238 | 46  | 397 | 297 | 216 | 263 Tubulin beta-2B chain OS=Mus musculus GN=Tab2b PE=1 SV=1                                                          |
| Q8BVQ9                  | 7.2558E-03 | 61  | 55  | 49  | 21  | 17  | 21  | 21  | 20 26S protease regulatory subunit 7 OS=Mus musculus GN=Psmc2 PE=1 SV=1                                               |
| Q9CWS0                  | 7.2764E-03 | 0   | 0   | 0   | 0   | 5   | 3   | 4   | 3 N(G),N(G)-dimethylarginine dimethylaminohydrolyase 1 OS=Mus musculus GN=Ddah1 PE=1 SV=3                             |
| P25444                  | 7.2876E-03 | 132 | 107 | 110 | 46  | 37  | 30  | 47  | 101 40S ribosomal protein S2 OS=Mus musculus GN=Rps2 PE=1 SV=3                                                        |
| Q61191                  | 7.2890E-03 | 19  | 9   | 12  | 4   | 2   | 0   | 0   | 4 Host cell factor 1 OS=Mus musculus GN=Hcfc1 PE=1 SV=2                                                               |
| F6Y7Z4                  | 7.2979E-03 | 125 | 104 | 103 | 46  | 26  | 25  | 43  | 95 Protein Gmf576 OS=Mus musculus GN=Gmf576 PE=3 SV=2                                                                 |
| Q64314                  | 7.3258E-03 | 0   | 0   | 0   | 0   | 8   | 10  | 5   | 13 Hematopoietic progenitor cell antigen CD34 OS=Mus musculus GN=CD34 PE=1 SV=1                                       |
| O88342                  | 7.3340E-03 | 27  | 20  | 21  | 5   | 39  | 30  | 20  | 30 WD repeat-containing protein 1 OS=Mus musculus GN=Wdr1 PE=1 SV=3                                                   |
| P46471                  | 7.4418E-03 | 61  | 56  | 49  | 21  | 18  | 21  | 21  | 20 26S protease regulatory subunit 7 OS=Mus musculus GN=Psmc2 PE=1 SV=5                                               |
| P01027                  | 7.5220E-03 | 0   | 0   | 0   | 0   | 12  | 17  | 11  | 10 Complement C3 OS=Mus musculus GN=C3 PE=1 SV=3                                                                      |
| P46664                  | 7.5288E-03 | 18  | 15  | 21  | 8   | 2   | 5   | 3   | 2 Adenylosuccinate synthetase isozyme 2 OS=Mus musculus GN=Adss PE=1 SV=2                                             |
| A0A087WS56              | 7.5463E-03 | 48  | 34  | 45  | 13  | 518 | 384 | 169 | 326 Fibronectin OS=Mus musculus GN=Fnl PE=1 SV=1                                                                      |
| Q9CQW9                  | 7.5996E-03 | 0   | 5   | 8   | 0   | 16  | 13  | 11  | 12 Interferon-induced transmembrane protein 3 OS=Mus musculus GN=Ifitm3 PE=1 SV=1                                     |
| Q3U687                  | 7.6210E-03 | 0   | 5   | 0   | 0   | 5   | 8   | 6   | 6 Protein Hrh1b2 OS=Mus musculus GN=Hrh1b2 PE=1 SV=1                                                                  |
| F6RP19                  | 7.6306E-03 | 19  | 14  | 9   | 4   | 6   | 0   | 0   | 5 Insulin-degrading enzyme (Fragment) OS=Mus musculus GN=Ide PE=1 SV=1                                                |
| Q5NC80                  | 7.7732E-03 | 22  | 26  | 22  | 4   | 65  | 54  | 56  | 51 Nucleoside diphosphate kinase (Fragment) OS=Mus musculus GN=Nme1 PE=1 SV=1                                         |
| Q920B9                  | 7.7924E-03 | 12  | 6   | 12  | 5   | 3   | 0   | 0   | 3 FACT complex subunit SPT16 OS=Mus musculus GN=Supt16 PE=1 SV=2                                                      |
| G3X956                  | 7.7924E-03 | 12  | 6   | 12  | 5   | 3   | 0   | 0   | 3 FACT complex subunit SPT16 OS=Mus musculus GN=Supt16 PE=1 SV=1                                                      |
| D3Z536                  | 7.8935E-03 | 120 | 98  | 98  | 46  | 23  | 22  | 43  | 92 Protein Gm8225 OS=Mus musculus GN=Gm8225 PE=3 SV=1                                                                 |
| B1AUX2                  | 7.9058E-03 | 19  | 9   | 13  | 4   | 2   | 3   | 0   | 4 Host cell factor 1 OS=Mus musculus GN=Hcfc1 PE=1 SV=1                                                               |
| P62874                  | 7.9091E-03 | 108 | 89  | 75  | 36  | 45  | 32  | 32  | 44 Guanine nucleotide-binding protein G(I)G(S)G(T) subunit beta-1 OS=Mus musculus GN=Gnb1 PE=1 SV=3                   |
| P68372                  | 7.9313E-03 | 311 | 205 | 249 | 46  | 416 | 310 | 228 | 281 Tubulin beta-4B chain OS=Mus musculus GN=Tab4b PE=1 SV=1                                                          |
| Q8BMJ2                  | 7.9445E-03 | 88  | 67  | 77  | 23  | 67  | 51  | 32  | 41 Leucine-4RNA ligase, cytoplasmic OS=Mus musculus GN=Lars PE=1 SV=2                                                 |
| Q99L27                  | 8.1290E-03 | 19  | 10  | 12  | 6   | 0   | 4   | 0   | 4 GMP reductase 2 OS=Mus musculus GN=Gmpr2 PE=1 SV=1                                                                  |
| P43346                  | 8.1445E-03 | 16  | 14  | 9   | 0   | 0   | 0   | 0   | 8 Dicycloxydine kinase OS=Mus musculus GN=Dck PE=1 SV=1                                                               |
| E93NN1                  | 8.1965E-03 | 148 | 87  | 91  | 25  | 39  | 34  | 22  | 39 ATP-dependent RNA helicase A OS=Mus musculus GN=Dhx9 PE=1 SV=1                                                     |
| A0A087WPL5              | 8.1965E-03 | 148 | 87  | 91  | 25  | 39  | 34  | 22  | 39 ATP-dependent RNA helicase A OS=Mus musculus GN=Dhx9 PE=1 SV=1                                                     |
| Q3UHL6                  | 8.2428E-03 | 49  | 35  | 47  | 14  | 533 | 385 | 169 | 334 Fibronectin OS=Mus musculus GN=Fnl PE=1 SV=1                                                                      |
| P52293                  | 8.2573E-03 | 15  | 7   | 15  | 4   | 8   | 4   | 5   | 8 Importin subunit alpha-1 OS=Mus musculus GN=Kpna2 PE=1 SV=2                                                         |
| Q7TMM9                  | 8.2655E-03 | 304 | 194 | 239 | 44  | 402 | 298 | 216 | 263 Tubulin beta-2A chain OS=Mus musculus GN=Tab2a PE=1 SV=1                                                          |
| Q8K354                  | 8.3182E-03 | 4   | 0   | 0   | 0   | 15  | 14  | 15  | 16 Carbonyl reductase [NADPH] 3 OS=Mus musculus GN=Cbr3 PE=1 SV=1                                                     |
| J3QNW0                  | 8.5121E-03 | 57  | 46  | 40  | 12  | 8   | 13  | 11  | 19 DNA (cytosine-5)-methyltransferase OS=Mus musculus GN=Dnmt1 PE=1 SV=1                                              |
| P13864                  | 8.5121E-03 | 57  | 46  | 40  | 12  | 8   | 13  | 11  | 19 DNA (cytosine-5)-methyltransferase 1 OS=Mus musculus GN=Dnmt1 PE=1 SV=5                                            |
| A0A087WR50              | 8.5143E-03 | 49  | 35  | 47  | 14  | 537 | 393 | 169 | 338 Fibronectin OS=Mus musculus GN=Fnl PE=1 SV=1                                                                      |
| Q920E5                  | 8.5396E-03 | 0   | 0   | 2   | 8   | 0   | 5   | 6   | 3 Farnesyl pyrophosphate synthase OS=Mus musculus GN=Fdps PE=1 SV=1                                                   |
| D3Z2H7                  | 8.5584E-03 | 0   | 5   | 4   | 2   | 25  | 14  | 14  | 25 Catenin delta-1 OS=Mus musculus GN=Ctnd1 PE=1 SV=1                                                                 |
| P11276                  | 8.5928E-03 | 49  | 35  | 47  | 14  | 537 | 394 | 169 | 337 Fibronectin OS=Mus musculus GN=Fnl PE=1 SV=4                                                                      |
| Q9Q2X6                  | 8.5939E-03 | 12  | 16  | 20  | 8   | 0   | 3   | 0   | 3 Structural maintenance of chromosomes protein OS=Mus musculus GN=Smc4 PE=1 SV=1                                     |
| O8CG47                  | 8.5939E-03 | 12  | 16  | 20  | 8   | 0   | 3   | 0   | 3 Structural maintenance of chromosomes protein 4 OS=Mus musculus GN=Smc4 PE=1 SV=1                                   |
| contaminant_UBIQUITIN02 | 8.7200E-03 | 50  | 42  | 42  | 10  | 107 | 68  | 50  | 70 no description                                                                                                     |
| P62908                  | 8.8084E-03 | 121 | 77  | 102 | 25  | 81  | 60  | 55  | 69 40S ribosomal protein S3 OS=Mus musculus GN=Rps3 PE=1 SV=1                                                         |
| Z4YL18                  | 8.8100E-03 | 18  | 20  | 7   | 11  | 6   | 8   | 0   | 10 Clustered mitochondria protein homolog OS=Mus musculus GN=Cluh PE=1 SV=1                                           |
| P14069                  | 8.9384E-03 | 31  | 24  | 30  | 6   | 56  | 41  | 40  | 32 Protein S100A6 OS=Mus musculus GN=S100a6 PE=1 SV=3                                                                 |
| Q05793                  | 9.0005E-03 | 400 | 325 | 327 | 143 | 983 | 731 | 531 | 695 Basement membrane-specific heparan sulfate proteoglycan core protein OS=Mus musculus GN=Hspg2 PE=1 SV=1           |
| Q6P570                  | 9.1060E-03 | 0   | 11  | 8   | 0   | 0   | 0   | 0   | 0 RRP12-like protein OS=Mus musculus GN=RRP12 PE=1 SV=1                                                               |
| P07290                  | 9.1634E-03 | 0   | 0   | 0   | 0   | 13  | 18  | 7   | 12 55 kDa erythrocyte membrane protein OS=Mus musculus GN=Mpp1 PE=1 SV=1                                              |
| A2AN84                  | 9.1634E-03 | 0   | 0   | 0   | 0   | 13  | 18  | 7   | 12 55 kDa erythrocyte membrane protein OS=Mus musculus GN=Mpp1 PE=1 SV=1                                              |
| P97427                  | 9.1695E-03 | 8   | 3   | 8   | 0   | 19  | 18  | 12  | 16 Dihydropyrimidinase-related protein 1 OS=Mus musculus GN=Crpm1 PE=1 SV=1                                           |
| P11370                  | 9.2154E-03 | 13  | 10  | 6   | 2   | 0   | 0   | 0   | 0 Retrovirus-related Env polyprotein from Fv-4 locus OS=Mus musculus GN=Fv4 PE=1 SV=2                                 |
| Q03350                  | 9.2283E-03 | 0   | 0   | 0   | 0   | 14  | 12  | 6   | 6 Thrombospondin-2 OS=Mus musculus GN=Thbs2 PE=1 SV=2                                                                 |
| A0A087WSN6              | 9.2657E-03 | 47  | 35  | 47  | 14  | 505 | 370 | 157 | 318 Fibronectin OS=Mus musculus GN=Fnl PE=1 SV=1                                                                      |
| P62259                  | 9.2766E-03 | 34  | 34  | 35  | 14  | 68  | 54  | 35  | 71 14-3-3 protein epsilon OS=Mus musculus GN=Ywhae PE=1 SV=1                                                          |
| P17918                  | 9.4833E-03 | 54  | 39  | 37  | 16  | 42  | 29  | 21  | 33 Proliferating cell nuclear antigen OS=Mus musculus GN=Pcna PE=1 SV=2                                               |
| Q7TMB8                  | 9.5097E-03 | 41  | 27  | 26  | 17  | 15  | 8   | 8   | 26 Cytoplasmic FMR1-interacting protein 1 OS=Mus musculus GN=Cyflp1 PE=1 SV=1                                         |
| Q02159                  | 9.5305E-03 | 23  | 14  | 15  | 6   | 49  | 29  | 19  | 32 Inhibitor of GTP-binding protein RhoC OS=Mus musculus GN=Rhoce PE=1 SV=2                                           |
| Q64449                  | 9.5641E-03 | 0   | 0   | 0   | 0   | 7   | 9   | 5   | 13 C-type mannose receptor 2 OS=Mus musculus GN=Mrc2 PE=1 SV=3                                                        |
| Q9Z1N5                  | 9.5894E-03 | 34  | 28  | 33  | 13  | 24  | 14  | 11  | 19 Spliceosome RNA helicase Ddx39b OS=Mus musculus GN=Ddx39b PE=1 SV=1                                                |
| P14428                  | 9.6101E-03 | 0   | 0   | 0   | 0   | 6   | 5   | 4   | 10 H-2 class I histocompatibility antigen, K-Q alpha chain (Fragment) OS=Mus musculus GN=H2-K1 PE=1 SV=1              |
| Q6PHC1                  | 9.6643E-03 | 147 | 127 | 136 | 34  | 108 | 84  | 64  | 90 Alpha-enolase OS=Mus musculus GN=Eno1 PE=1 SV=1                                                                    |
| Q9D6X6                  | 9.6692E-03 | 5   | 4   | 4   | 0   | 29  | 18  | 10  | 23 Serine protease 23 OS=Mus musculus GN=Prss23 PE=2 SV=2                                                             |
| Q63844                  | 9.8163E-03 | 28  | 17  | 19  | 6   | 15  | 12  | 10  | 8 Mitogen-activated protein kinase 3 OS=Mus musculus GN=Mapk3 PE=1 SV=5                                               |
| P14131                  | 9.8561E-03 | 45  | 30  | 37  | 16  | 27  | 21  | 14  | 25 40S ribosomal protein S16 OS=Mus musculus GN=Rps16 PE=1 SV=4                                                       |
| Q8VC28                  | 9.9026E-03 | 7   | 8   | 7   | 4   | 0   | 0   | 0   | 0 Aldo-keto reductase family 1 member C13 OS=Mus musculus GN=Akr1c13 PE=1 SV=2                                        |
| G3X924                  | 9.9491E-03 | 13  | 15  | 16  | 12  | 14  | 15  | 8   | 0 MCG115964 OS=Mus musculus GN=Wdr70 PE=1 SV=1                                                                        |
| Q9Z3W3                  | 9.9990E-03 | 29  | 22  | 28  | 12  | 12  | 12  | 10  | 10 SWI/SNF-related matrix-associated regulator of chromatin subfamily A member 5 OS=Mus musculus GN=Smarca5 PE=1 SV=1 |
| Q9J100                  | 1.0010E-02 | 0   | 0   | 0   | 0   | 3   | 4   | 4   | 6 Phospholipid scramblase 1 OS=Mus musculus GN=Plscr1 PE=1 SV=1                                                       |
| Q8BK63                  | 1.0103E-02 | 6   | 2   | 0   | 2   | 23  | 13  | 16  | 19 Inactive tyrosine-protein kinase 7 OS=Mus musculus GN=Ptk7 PE=1 SV=1                                               |
| Q50116                  | 1.0175E-02 | 39  | 25  | 32  | 12  | 25  | 18  | 12  | 17 Probable ATP-dependent RNA helicase DDX17 OS=Mus musculus GN=DDX17 PE=1 SV=1                                       |
| Z4YJ55                  | 1.0354E-02 | 31  | 23  | 27  | 5   | 57  | 46  | 46  | 35 Agrin OS=Mus musculus GN=Agm PE=1 SV=1                                                                             |
| Q9C857                  | 1.0400E-02 | 9   | 5   | 6   | 0   | 15  | 13  | 11  | 12 60S ribosomal protein L14 OS=Mus musculus GN=Rpl14 PE=1 SV=3                                                       |
| B7ZWL1                  | 1.0402E-02 | 14  | 10  | 15  | 3   | 0   | 0   | 0   | 4 CCR4-NOT transcription complex subunit 1 OS=Mus musculus GN=Cnot1 PE=1 SV=1                                         |
| Q6ZQ08                  | 1.0402E-02 | 14  | 10  | 15  | 3   | 0   | 0   | 0   | 4 CCR4-NOT transcription complex subunit 1 OS=Mus musculus GN=Cnot1 PE=1 SV=2                                         |
| P80315                  | 1.0444E-02 | 105 | 83  | 101 | 25  | 80  | 50  | 37  | 56 T-complex protein 1 subunit delta OS=Mus musculus GN=Ccd4 PE=1 SV=3                                                |
| P70168                  | 1.0504E-02 | 51  | 38  | 49  | 14  | 63  | 52  | 40  | 58 Importin subunit beta-1 OS=Mus musculus GN=Kpnb1 PE=1 SV=2                                                         |
| Q3U741                  | 1.0510E-02 | 39  | 25  | 31  | 2   | 25  | 18  | 12  | 17 EAD1 (Alpha-Glu-ActA) domain OS=Mus musculus GN=EAD1 PE=1 SV=1                                                     |
| G3XUX2                  | 1.0594E-02 | 0   | 0   | 0   | 0   | 3   | 3   | 4   | 5 Casein kinase II subunit beta (Fragment) OS=Mus musculus GN=Csk2b PE=1 SV=2                                         |
| P61622                  | 1.0594E-02 | 0   | 0   | 0   | 0   | 3   | 3   | 4   | 5 Integrin alpha-11 OS=Mus musculus GN=Igal1 PE=1 SV=1                                                                |
| A0A0B41F10              | 1.0594E-02 | 0   | 0   | 0   | 0   | 3   | 3   | 4   | 5 Integrin alpha-11 OS=Mus musculus GN=Igal1 PE=1 SV=1                                                                |
| Q8K2A1                  | 1.0610E-02 | 0   | 0   | 0   | 0   | 6   | 4   | 3   | 2 PTB domain-containing engulfment adapter protein 1 OS=Mus musculus GN=Gulp1 PE=1 SV=1                               |
| E0CXC5                  | 1.0610E-02 | 0   | 0   | 0   | 0   | 6   | 4   | 3   | 2 PTB domain-containing engulfment adapter protein 1 OS=Mus musculus GN=Gulp1 PE=1 SV=1                               |
| Q57119                  | 1.0634E-02 | 6   | 4   | 8   | 3   | 0   | 0   | 0   | 0 Aldehyde dehydrogenase family 16 member A1 OS=Mus musculus GN=Aldh16a1 PE=1 SV=2                                    |
| A0A1B0GSU0              | 1.0634E-02 | 6   | 4   | 8   | 3   | 0   | 0   | 0   | 0 Aldehyde dehydrogenase family 16 member A1 OS=Mus musculus GN=Aldh16a1 PE=1 SV=1                                    |
| D3Z0B9                  | 1.0634E-02 | 6   | 4   | 8   | 3   | 0   | 0   | 0   | 0 Aldehyde dehydrogenase family 16 member A1 OS=Mus musculus GN=Aldh16a1 PE=1 SV=3                                    |
| P43276                  | 1.0646E-02 | 11  | 8   | 18  | 3   | 0   | 0   | 0   | 0 Histone H1.5 OS=Mus musculus GN=H1st1b PE=1 SV=2                                                                    |
| J3QMC5                  | 1.0694E-02 | 127 | 102 | 101 | 46  | 27  | 25  | 46  | 98 Protein Gm5786 OS=Mus musculus GN=Gm5786 PE=3 SV=1                                                                 |
| O55131                  | 1.0714E-02 | 28  | 22  | 34  | 7   | 63  | 39  | 36  | 41 Septin-7 OS=Mus musculus GN=Sept7 PE=1 SV=1                                                                        |
| Q9IG18                  | 1.0714E-02 | 28  | 22  | 34  | 7   | 63  | 39  | 36  | 41 Septin-7 OS=Mus musculus GN=Sept7 PE=1 SV=2                                                                        |
| E9QF5                   | 1.0714E-02 | 28  | 22  | 34  | 7   | 63  | 39  | 36  | 41 Septin-7 OS=Mus musculus GN=Sept7 PE=1 SV=2                                                                        |
| E9PXY8                  | 1.0726E-02 | 15  | 23  | 14  | 5   | 0   | 0   | 0   | 0 Ubiquitin carboxyl-terminal hydrolase 7 OS=Mus musculus GN=Usp7 PE=1 SV=1                                           |
| F8VPX1                  | 1.0726E-02 | 15  | 23  | 14  | 5   | 0   | 0   | 0   | 0 Ubiquitin carboxyl-terminal hydrolase 7 OS=Mus musculus GN=Usp7 PE=1 SV=1                                           |
| Q6A4J8                  | 1.0726E-02 | 15  | 23  | 14  | 5   | 0   | 0   | 0   | 0 Ubiquitin carboxyl-terminal hydrolase 7 OS=Mus musculus GN=Usp7 PE=1 SV=1                                           |
| Q8VEE4                  | 1.0818E-02 | 13  | 15  | 14  | 6   | 3   | 8   | 8   | 12 Replication protein A 70 kDa DNA-binding subunit OS=Mus musculus GN=Rpa1 PE=1 SV=1                                 |
| Q3TWF6                  | 1.0825E-02 | 13  | 15  | 15  | 8   | 0   | 0   | 0   | 7 Wdr6-containing protein 70 OS=Mus musculus GN=Wdr70 PE=1 SV=1                                                       |
| Q35646                  | 1.0934E-02 | 0   | 0   | 0   | 0   | 3   | 5   | 4   | 7 Calpain-6 OS=Mus musculus GN=Capn6 PE=1 SV=2                                                                        |
| P15379                  | 1.1007E-02 | 7   | 5   | 0   | 0   | 14  | 11  | 8   | 11 CD44 antigen OS=Mus musculus GN=CD44 PE=1 SV=3                                                                     |
| Q9JH87                  | 1.1073E-02 | 17  | 14  | 8   | 4   | 6   | 0   | 0   | 5 Insulin-like growth factor 1 OS=Mus musculus GN=Igf1 PE=1 SV=1                                                      |
| Q9D0F9                  | 1.1235E-02 | 0   | 0   | 0   | 0   | 8   | 6   | 5   | 13 Phosphoglucomutase-1 OS=Mus musculus GN=Pgm1 PE=1 SV=4                                                             |
| P19324                  | 1.1397E-02 | 13  | 6   | 10  | 0   | 33  | 30  | 16  | 28 Serpin H1 OS=Mus musculus GN=Serpinh1 PE=1 SV=3                                                                    |
| Q5SWN2                  | 1.1419E-02 | 13  | 15  | 14  | 6   | 3   | 8   | 8   | 11 Replication protein A 70 kDa DNA-binding subunit OS=Mus musculus GN=Rpa1 PE=1 SV=2                                 |
| P97310                  | 1.1443E-02 | 88  | 81  | 92  | 22  | 64  | 67  | 40  | 57 DNA replication licensing factor MCM2 OS=Mus musculus GN=Mcm2 PE=1 SV=3                                            |
| E9QN12                  | 1.1496E-02 | 0   | 0   | 0   | 0   | 8   | 3   | 6   | 6 Platelet-derived growth factor receptor beta OS=Mus musculus GN=Pdgfrb PE=1 SV=1                                    |
| P05622                  | 1.1496E-02 | 0   | 0   | 0   | 0   | 8   | 3   | 6   | 6 Platelet-derived growth factor receptor beta OS=Mus musculus GN=Pdgfrb PE=1 SV=1                                    |
| E9QPE2                  | 1.1496E-02 | 0   | 0   | 0   | 0   | 8   | 3   | 6   | 6 Platelet-derived growth factor receptor beta OS=Mus musculus GN=Pdgfrb PE=1 SV=1                                    |
| Q9QJ17                  | 1.1602E-02 | 6   | 8   | 3   | 2   | 2   | 3   | 0   | 0 Long-chain fatty-acid-CoA ligase 4 OS=Mus musculus GN=Acsl4 PE=1 SV=2                                               |
| Q8VDW0                  | 1.1637E-02 | 37  | 20  | 25  | 5   | 17  | 6   | 6   | 10 ATP-dependent RNA helicase DDX39A OS=Mus musculus GN=DDX39a PE=1 SV=1                                              |
| Q6GQ11                  | 1.1733E-02 | 0   | 0   | 0   | 0   | 4   | 8   | 4   | 6 Alpha-2-macroglobulin-P OS=Mus musculus GN=A2m PE=2 SV=2                                                            |
| P26231                  | 1.1905E-02 | 11  | 9   | 11  | 0   | 45  | 31  | 18  | 36 Catenin alpha-1 OS=Mus musculus GN=Cttna1 PE=1 SV=1                                                                |
| B2RUE8                  | 1.1944E-02 | 0   | 0   | 0   | 0   | 3   | 5   | 5   | 6 Map4k4 protein OS=Mus musculus GN=Map4k4 PE=1 SV=1                                                                  |
| A0A0A6YWM8              | 1.1944E-02 | 0   | 0   | 0   | 0   | 3   | 5   | 5   | 6 Mitogen-activated protein kinase kinase kinase kinase 4 OS=Mus musculus GN=Map4k4 PE=1 SV=1                         |
| P97820                  | 1.1961E-02 | 0   | 0   | 0   | 0   | 3   | 4   | 4   | 3 Mitogen-activated protein kinase kinase kinase kinase 4 OS=Mus musculus GN=Map4k4 PE=1 SV=1                         |
| F7DBB3                  | 1.1974E-02 | 0   | 0   | 0   | 0   | 7   | 4   | 7   | 6 Protein Ahnak2 (Fragment) OS=Mus musculus GN=Ahnak2 PE=1 SV=1                                                       |
| P85VDJ3                 | 1.2054E-02 | 3   | 4   | 3   | 0   | 13  | 9   | 10  | 13 Vigilin OS=Mus musculus GN=Hdlbp PE=1 SV=1                                                                         |
| P25449                  | 1.2080E-02 | 0   | 0   | 0   | 0   | 2   | 4   | 2   | 4 Retinal dehydrogenase 1 OS=Mus musculus                                                                             |

|            |            |     |     |     |    |     |     |     |                                                                                                           |
|------------|------------|-----|-----|-----|----|-----|-----|-----|-----------------------------------------------------------------------------------------------------------|
| P38647     | 1.3733E-02 | 0   | 0   | 0   | 0  | 7   | 5   | 2   | 3 Stress-70 protein, mitochondrial OS=Mus musculus GN=Hspa9 PE=1 SV=3                                     |
| P12382     | 1.3745E-02 | 43  | 36  | 35  | 9  | 23  | 15  | 6   | 20 ATP-dependent 6-phosphofruktokinase, liver type OS=Mus musculus GN=Pfkfb1 PE=1 SV=4                    |
| Q9CZU6     | 1.3792E-02 | 31  | 23  | 21  | 8  | 16  | 15  | 10  | 22 Citrate synthase, mitochondrial OS=Mus musculus GN=Cs PE=1 SV=1                                        |
| E9PWE8     | 1.3936E-02 | 0   | 0   | 0   | 0  | 39  | 29  | 8   | 29 Dihydropyrimidinase-related protein 3 OS=Mus musculus GN=Dpysl3 PE=1 SV=1                              |
| D3Z366     | 1.4153E-02 | 28  | 17  | 19  | 6  | 13  | 12  | 0   | 8 Mitogen-activated protein kinase OS=Mus musculus GN=Mapk3 PE=1 SV=1                                     |
| D3YV80     | 1.4229E-02 | 0   | 2   | 2   | 0  | 3   | 5   | 3   | 5 Unconventional myosin-Ib (Fragment) OS=Mus musculus GN=Myo1b PE=1 SV=1                                  |
| Q07113     | 1.4478E-02 | 4   | 0   | 0   | 0  | 11  | 15  | 11  | 18 Cation-independent mannose 6-phosphate receptor OS=Mus musculus GN=lg2r PE=1 SV=1                      |
| Q01768     | 1.4502E-02 | 22  | 20  | 22  | 2  | 48  | 38  | 39  | 49 Nucleoside diphosphate kinase II OS=Mus musculus GN=Nme2 PE=1 SV=1                                     |
| Q6P5F7     | 1.4588E-02 | 2   | 3   | 0   | 0  | 7   | 6   | 5   | 7 Protein tweety homolog 3 OS=Mus musculus GN=Tyh3 PE=1 SV=1                                              |
| AOA0J9YUL3 | 1.4623E-02 | 18  | 18  | 17  | 5  | 39  | 26  | 26  | 31 Septin 11, isoform CRA_b OS=Mus musculus GN=Sept11 PE=1 SV=1                                           |
| Q8C1B7     | 1.4623E-02 | 18  | 18  | 17  | 5  | 39  | 26  | 26  | 31 Septin-11 OS=Mus musculus GN=Sept11 PE=1 SV=4                                                          |
| AOA0J9YTY0 | 1.4623E-02 | 18  | 18  | 17  | 5  | 39  | 26  | 26  | 31 Septin-11 OS=Mus musculus GN=Sept11 PE=1 SV=1                                                          |
| Q60864     | 1.4640E-02 | 22  | 16  | 25  | 7  | 43  | 40  | 28  | 34 Stress-induced-phosphoprotein 1 OS=Mus musculus GN=Stip1 PE=1 SV=1                                     |
| Q5SUR0     | 1.4697E-02 | 24  | 19  | 22  | 5  | 18  | 15  | 13  | 15 Phosphoribosylformylglycinamide synthase OS=Mus musculus GN=Pfbs PE=1 SV=1                             |
| P26043     | 1.4775E-02 | 51  | 41  | 38  | 10 | 86  | 78  | 74  | 72 Radixin OS=Mus musculus GN=Rdx PE=1 SV=3                                                               |
| E90616     | 1.4784E-02 | 29  | 25  | 21  | 14 | 54  | 53  | 51  | 81 Protein Ahnak OS=Mus musculus GN=Ahnak PE=1 SV=1                                                       |
| Q9D281     | 1.4866E-02 | 0   | 0   | 0   | 0  | 8   | 10  | 8   | 4 Protein Nesp2l OS=Mus musculus GN=Nesp2l PE=1 SV=1                                                      |
| Q9R0B9     | 1.4968E-02 | 29  | 20  | 29  | 4  | 0   | 3   | 0   | 3 Procollagen-llysine-2-oxoglutarate 5-dioxygenase 2 OS=Mus musculus GN=Plod2 PE=1 SV=2                   |
| E9Q718     | 1.4968E-02 | 29  | 20  | 29  | 4  | 0   | 3   | 0   | 3 Procollagen-llysine-2-oxoglutarate 5-dioxygenase 2 OS=Mus musculus GN=Plod2 PE=1 SV=1                   |
| Q8BKCS     | 1.4986E-02 | 26  | 21  | 21  | 10 | 10  | 9   | 8   | 7 Importin-5 OS=Mus musculus GN=Ipo5 PE=1 SV=3                                                            |
| AOA0R4J008 | 1.5163E-02 | 17  | 12  | 19  | 2  | 10  | 0   | 5   | 0 Histone deacetylase OS=Mus musculus GN=Hdac2 PE=1 SV=1                                                  |
| P11087     | 1.5241E-02 | 0   | 0   | 0   | 0  | 43  | 36  | 13  | 19 Collagen alpha-1(I) chain OS=Mus musculus GN=Coll1a1 PE=1 SV=4                                         |
| Q08093     | 1.5428E-02 | 0   | 0   | 0   | 0  | 7   | 5   | 6   | 3 Calponin-2 OS=Mus musculus GN=Cnm2 PE=1 SV=1                                                            |
| P07356     | 1.5573E-02 | 123 | 89  | 75  | 15 | 208 | 135 | 97  | 156 Annexin A2 OS=Mus musculus GN=Anxa2 PE=1 SV=2                                                         |
| Q9JLD8     | 1.5789E-02 | 0   | 5   | 4   | 0  | 24  | 15  | 9   | 17 N(G),N(G)-dimethylarginine dimethylaminohydrolase 2 OS=Mus musculus GN=Ddah2 PE=1 SV=1                 |
| O8S544     | 1.5820E-02 | 17  | 8   | 12  | 3  | 7   | 4   | 0   | 4 COP9 signalosome complex subunit 4 OS=Mus musculus GN=Caps4 PE=1 SV=1                                   |
| D3YV18     | 1.5919E-02 | 26  | 24  | 21  | 11 | 14  | 6   | 6   | 20 Histone deacetylase OS=Mus musculus GN=Gml10093 PE=3 SV=1                                              |
| O08529     | 1.5974E-02 | 24  | 17  | 12  | 4  | 12  | 8   | 2   | 10 Calpain-2 catalytic subunit OS=Mus musculus GN=Capn2 PE=1 SV=4                                         |
| P16045     | 1.6282E-02 | 62  | 21  | 51  | 5  | 100 | 84  | 83  | 111 Galectin-1 OS=Mus musculus GN=Lgals1 PE=1 SV=3                                                        |
| P51410     | 1.6287E-02 | 14  | 10  | 11  | 6  | 10  | 3   | 0   | 8 60S ribosomal protein L9 OS=Mus musculus GN=Rpl9 PE=2 SV=2                                              |
| AOA0G2JES3 | 1.6287E-02 | 14  | 10  | 11  | 6  | 10  | 3   | 0   | 8 60S ribosomal protein L9 (Fragment) OS=Mus musculus GN=Rpl9 PE=1 SV=1                                   |
| D3Z795     | 1.6341E-02 | 13  | 6   | 7   | 3  | 6   | 0   | 0   | 8 Proteasome assembly chaperone 1 OS=Mus musculus GN=Psmg1 PE=1 SV=1                                      |
| Q9JK23     | 1.6341E-02 | 13  | 6   | 7   | 3  | 6   | 0   | 0   | 8 Proteasome assembly chaperone 1 OS=Mus musculus GN=Psmg1 PE=1 SV=1                                      |
| Q8BZY3     | 1.6354E-02 | 6   | 4   | 6   | 0  | 9   | 8   | 9   | 4 Protein Ddx19b OS=Mus musculus GN=Ddx19b PE=1 SV=1                                                      |
| Q8CG48     | 1.6731E-02 | 13  | 6   | 3   | 2  | 2   | 0   | 0   | 0 Structural maintenance of chromosomes protein 2 OS=Mus musculus GN=Smc2 PE=1 SV=2                       |
| O35593     | 1.6755E-02 | 10  | 10  | 16  | 5  | 6   | 6   | 8   | 7 26S proteasome non-ATPase regulatory subunit 14 OS=Mus musculus GN=Psm14 PE=1 SV=2                      |
| Q9Z4C1     | 1.6777E-02 | 4   | 0   | 6   | 0  | 4   | 4   | 0   | 3 Eya2-5 OS=Mus musculus GN=Xpo5 PE=1 SV=2                                                                |
| Q9PL47     | 1.6949E-02 | 12  | 14  | 6   | 3  | 23  | 19  | 13  | 21 Hsc70-interacting protein OS=Mus musculus GN=Hsc70 PE=1 SV=1                                           |
| P54775     | 1.7078E-02 | 60  | 78  | 77  | 40 | 27  | 27  | 35  | 66 26S proteasome regulatory subunit 6B OS=Mus musculus GN=Psm6b PE=1 SV=2                                |
| Q3U6K9     | 1.7100E-02 | 8   | 2   | 6   | 0  | 24  | 33  | 16  | 28 Phosphoserine aminotransferase OS=Mus musculus GN=Psat1 PE=1 SV=1                                      |
| AOA0J9YUD8 | 1.7142E-02 | 5   | 7   | 5   | 0  | 9   | 15  | 11  | 10 High mobility group protein B1 OS=Mus musculus GN=Hmgbl PE=1 SV=1                                      |
| Q61598     | 1.7222E-02 | 18  | 14  | 14  | 2  | 55  | 29  | 21  | 39 Rab GDP dissociation inhibitor beta OS=Mus musculus GN=Gdi2 PE=1 SV=1                                  |
| Q62188     | 1.7362E-02 | 0   | 0   | 0   | 0  | 39  | 29  | 7   | 29 Dihydropyrimidinase-related protein 3 OS=Mus musculus GN=Dpysl3 PE=1 SV=1                              |
| P26039     | 1.7463E-02 | 27  | 23  | 28  | 7  | 67  | 41  | 30  | 50 Talin-1 OS=Mus musculus GN=Tln1 PE=1 SV=2                                                              |
| Q9JIM1     | 1.7471E-02 | 0   | 7   | 9   | 0  | 8   | 10  | 10  | 7 Equilibrative nucleoside transporter 1 OS=Mus musculus GN=Slc29a1 PE=1 SV=3                             |
| P47577     | 1.7699E-02 | 26  | 23  | 26  | 9  | 46  | 51  | 29  | 43 F-actin-capping protein subunit beta OS=Mus musculus GN=Capzb PE=1 SV=3                                |
| G3XV00     | 1.7823E-02 | 0   | 0   | 6   | 0  | 5   | 6   | 0   | 6 MCM224, isoform CRA_a OS=Mus musculus GN=Mcm224 PE=1 SV=1                                               |
| Q8YB89     | 1.7839E-02 | 11  | 8   | 8   | 2  | 18  | 20  | 17  | 25 Choline transporter-like protein 2 OS=Mus musculus GN=Slc44a2 PE=1 SV=1                                |
| G3XA10     | 1.7881E-02 | 45  | 36  | 52  | 14 | 37  | 23  | 19  | 28 Heterogeneous nuclear ribonucleoprotein U OS=Mus musculus GN=Hnrnpu PE=1 SV=1                          |
| Q8VEK3     | 1.7881E-02 | 45  | 36  | 52  | 14 | 37  | 23  | 19  | 28 Heterogeneous nuclear ribonucleoprotein U OS=Mus musculus GN=Hnrnpu PE=1 SV=1                          |
| P61358     | 1.7903E-02 | 23  | 13  | 16  | 4  | 18  | 6   | 5   | 10 60S ribosomal protein L27 OS=Mus musculus GN=Rpl27 PE=1 SV=2                                           |
| Q61881     | 1.8008E-02 | 66  | 63  | 64  | 32 | 33  | 18  | 15  | 21 DNA replication licensing factor MCM7 OS=Mus musculus GN=Mcm7 PE=1 SV=1                                |
| Q9QRU6     | 1.8083E-02 | 70  | 48  | 63  | 14 | 32  | 17  | 10  | 32 Prolyl endopeptidase OS=Mus musculus GN=Prep PE=1 SV=1                                                 |
| Q9CXF4     | 1.8088E-02 | 11  | 8   | 3   | 2  | 0   | 0   | 0   | 0 TBC1 domain family member 15 OS=Mus musculus GN=Tbcld15 PE=1 SV=1                                       |
| Q8BUL30    | 1.8119E-02 | 78  | 59  | 50  | 14 | 24  | 20  | 0   | 20 Isoleucine-tRNA ligase, cytoplasmic OS=Mus musculus GN=Iars PE=1 SV=2                                  |
| O8S796     | 1.8161E-02 | 5   | 4   | 5   | 3  | 0   | 0   | 0   | 0 Ribonuclease P protein subunit p30 OS=Mus musculus GN=Rpp30 PE=1 SV=1                                   |
| E9PZ54     | 1.8233E-02 | 4   | 0   | 0   | 0  | 4   | 4   | 0   | 0 NHP1-like protein 1 OS=Mus musculus GN=Nhp1 PE=1 SV=1                                                   |
| Q9PK51     | 1.8264E-02 | 0   | 0   | 0   | 0  | 7   | 6   | 6   | 6 Plastin-3 OS=Mus musculus GN=Plk3 PE=1 SV=3                                                             |
| B1AX58     | 1.8264E-02 | 0   | 0   | 0   | 0  | 3   | 7   | 6   | 6 Plastin-3 OS=Mus musculus GN=Plk3 PE=1 SV=1                                                             |
| AOA1C7CYV0 | 1.8264E-02 | 0   | 0   | 0   | 0  | 3   | 7   | 6   | 6 Plastin-3 (Fragment) OS=Mus musculus GN=Plk3 PE=1 SV=1                                                  |
| Q9PK85     | 1.8362E-02 | 8   | 2   | 8   | 0  | 30  | 41  | 19  | 38 Phosphoserine aminotransferase OS=Mus musculus GN=Psat1 PE=1 SV=1                                      |
| P62962     | 1.8547E-02 | 53  | 57  | 56  | 18 | 73  | 104 | 70  | 89 Profilin-1 OS=Mus musculus GN=Pfn1 PE=1 SV=2                                                           |
| P35550     | 1.8548E-02 | 19  | 21  | 11  | 7  | 0   | 0   | 3   | 2 rRNA 2'-O-methyltransferase fibrillar OS=Mus musculus GN=Fbl PE=1 SV=2                                  |
| P27773     | 1.8679E-02 | 6   | 5   | 5   | 2  | 14  | 14  | 8   | 13 Protein disulfide-isomerase A3 OS=Mus musculus GN=Pdia3 PE=1 SV=2                                      |
| Q9Z3B1     | 1.8775E-02 | 7   | 10  | 4   | 3  | 0   | 0   | 0   | 4 Larat debanching enzyme OS=Mus musculus GN=Ldrb PE=1 SV=2                                               |
| AOA0G2JDF8 | 1.8823E-02 | 7   | 8   | 10  | 3  | 5   | 2   | 3   | 4 Serrate RNA effector molecule homolog (Fragment) OS=Mus musculus GN=Srt PE=1 SV=1                       |
| Q6427      | 1.9078E-02 | 23  | 14  | 17  | 7  | 85  | 46  | 28  | 48 Vinculin OS=Mus musculus GN=Vcl PE=1 SV=4                                                              |
| P99024     | 1.9142E-02 | 327 | 210 | 262 | 46 | 440 | 317 | 232 | 304 Tubulin beta-5 chain OS=Mus musculus GN=Tubb5 PE=1 SV=1                                               |
| O08810     | 1.9259E-02 | 28  | 22  | 23  | 5  | 10  | 11  | 10  | 12 116 kDa U5 small nuclear ribonucleoprotein component OS=Mus musculus GN=Efhud2 PE=1 SV=1               |
| A2AH85     | 1.9259E-02 | 28  | 22  | 23  | 5  | 10  | 11  | 10  | 12 116 kDa U5 small nuclear ribonucleoprotein component OS=Mus musculus GN=Efhud2 PE=1 SV=1               |
| Q99MR6     | 1.9436E-02 | 10  | 9   | 16  | 3  | 5   | 2   | 3   | 4 Serrate RNA effector molecule homolog OS=Mus musculus GN=Srt PE=1 SV=1                                  |
| Q7TPV4     | 1.9451E-02 | 41  | 44  | 41  | 10 | 18  | 17  | 13  | 24 Myb-binding protein 1A OS=Mus musculus GN=Mybb1a PE=1 SV=2                                             |
| Q8R2Q8     | 1.9477E-02 | 6   | 0   | 8   | 0  | 12  | 11  | 0   | 7 Bone marrow stromal antigen 2 OS=Mus musculus GN=Bst2 PE=1 SV=1                                         |
| D3Z7D5     | 1.9536E-02 | 0   | 0   | 0   | 0  | 8   | 5   | 2   | 3 Collagen alpha-2(VI) chain OS=Mus musculus GN=Col6a2 PE=1 SV=1                                          |
| P63101     | 1.9830E-02 | 78  | 75  | 78  | 35 | 54  | 31  | 42  | 70 14-3-3 protein zeta/delta OS=Mus musculus GN=Ywhaz PE=1 SV=1                                           |
| Q9Z2F4     | 1.9995E-02 | 209 | 150 | 180 | 38 | 311 | 233 | 152 | 186 Tubulin beta-6 chain OS=Mus musculus GN=Tubb6 PE=1 SV=1                                               |
| Q9CZK7     | 2.0166E-02 | 0   | 0   | 3   | 5  | 0   | 19  | 14  | 7 Serine hydroxymethyltransferase OS=Mus musculus GN=Shmt2 PE=1 SV=1                                      |
| Q6Z318     | 2.0297E-02 | 16  | 18  | 22  | 7  | 11  | 4   | 3   | 6 Transcription intermediary factor 1-beta OS=Mus musculus GN=Trim28 PE=1 SV=3                            |
| Q99J14     | 2.0300E-02 | 45  | 35  | 36  | 11 | 14  | 23  | 19  | 25 26S proteasome non-ATPase regulatory subunit 6 OS=Mus musculus GN=Psm6 PE=1 SV=1                       |
| F8WJK8     | 2.0318E-02 | 12  | 14  | 6   | 4  | 23  | 19  | 13  | 21 Hsc70-interacting protein OS=Mus musculus GN=Hsc70 PE=1 SV=1                                           |
| Q9R190     | 2.0435E-02 | 24  | 14  | 10  | 5  | 3   | 4   | 3   | 7 Metastasis-associated protein MTA2 OS=Mus musculus GN=Mta2 PE=1 SV=1                                    |
| P09103     | 2.0891E-02 | 3   | 0   | 4   | 0  | 14  | 20  | 9   | 16 Protein disulfide-isomerase OS=Mus musculus GN=P4hb PE=1 SV=2                                          |
| P05201     | 2.1068E-02 | 2   | 0   | 0   | 0  | 3   | 2   | 2   | 2 Aspartate aminotransferase, cytoplasmic OS=Mus musculus GN=Got1 PE=1 SV=3                               |
| Q8VDM6     | 2.1105E-02 | 12  | 8   | 10  | 4  | 7   | 3   | 4   | 2 Heterogeneous nuclear ribonucleoprotein L-like protein 1 OS=Mus musculus GN=Hnrnpull PE=1 SV=1          |
| Q8C8C0     | 2.1148E-02 | 0   | 0   | 0   | 0  | 22  | 10  | 4   | 14 Liprin-beta-1 OS=Mus musculus GN=Prip1 PE=1 SV=3                                                       |
| D3Z6N3     | 2.1164E-02 | 25  | 20  | 23  | 8  | 17  | 14  | 15  | 15 DNA replication licensing factor MCM7 OS=Mus musculus GN=Mcm7 PE=1 SV=1                                |
| Q8C7V3     | 2.1181E-02 | 4   | 4   | 2   | 2  | 0   | 0   | 0   | 0 U3 small nuclear RNA-associated protein 15 homolog OS=Mus musculus GN=Utp15 PE=1 SV=1                   |
| Q6PAR5     | 2.1295E-02 | 8   | 9   | 4   | 2  | 4   | 0   | 0   | 0 GTPase-activating protein and PCP9 domain-containing protein 1 OS=Mus musculus GN=Gapdpl PE=1 SV=2      |
| P17182     | 2.1348E-02 | 172 | 144 | 148 | 38 | 127 | 103 | 72  | 115 Alpha-enolase OS=Mus musculus GN=Eno1 PE=1 SV=3                                                       |
| A2AMW0     | 2.1410E-02 | 26  | 23  | 26  | 9  | 49  | 55  | 29  | 45 Capping protein (Actin filament) muscle Z-line, beta, isoform CRA_a OS=Mus musculus GN=Capzb PE=1 SV=1 |
| D3YWF6     | 2.1469E-02 | 14  | 12  | 12  | 6  | 9   | 10  | 8   | 18 Ubiquitin thioesterase OTUB1 OS=Mus musculus GN=Otub1 PE=1 SV=1                                        |
| Q7TQ13     | 2.1469E-02 | 14  | 12  | 12  | 6  | 9   | 10  | 8   | 18 Ubiquitin thioesterase OTUB1 OS=Mus musculus GN=Otub1 PE=1 SV=2                                        |
| AOA0G2JGZ5 | 2.1633E-02 | 0   | 0   | 0   | 0  | 12  | 6   | 2   | 8 PDZ and LIM domain protein 5 (Fragment) OS=Mus musculus GN=Pdlim5 PE=1 SV=1                             |
| Q8C052     | 2.1685E-02 | 12  | 12  | 6   | 4  | 16  | 16  | 9   | 17 Microtubule-associated protein 1S OS=Mus musculus GN=Map1s PE=1 SV=2                                   |
| P16546     | 2.1823E-02 | 21  | 12  | 18  | 3  | 29  | 26  | 19  | 27 Spectrin alpha chain, non-erythrocytic 1 OS=Mus musculus GN=Sptan1 PE=1 SV=4                           |
| AOA0L1RQ05 | 2.2058E-02 | 38  | 26  | 23  | 17 | 12  | 12  | 7   | 18 Cytoplasmic FMRI1-interacting protein 1 (Fragment) OS=Mus musculus GN=Cyfp1 PE=1 SV=1                  |
| E9PZF9     | 2.2099E-02 | 22  | 22  | 23  | 3  | 52  | 40  | 44  | 55 Nucleoside diphosphate kinase II OS=Mus musculus GN=Nme2 PE=3 SV=1                                     |
| B1AWE1     | 2.2323E-02 | 3   | 15  | 13  | 8  | 8   | 5   | 7   | 11 Clathrin light chain A OS=Mus musculus GN=Claa PE=1 SV=1                                               |
| B1AZ46     | 2.2450E-02 | 2   | 2   | 0   | 0  | 10  | 5   | 4   | 10 Brain-specific angiogenesis inhibitor 1-associated protein 2 OS=Mus musculus GN=Baip2 PE=1 SV=1        |
| Q8BKX1     | 2.2450E-02 | 3   | 2   | 0   | 0  | 10  | 5   | 4   | 10 Brain-specific angiogenesis inhibitor 1-associated protein 2 OS=Mus musculus GN=Baip2 PE=1 SV=2        |
| Q8JZK9     | 2.2527E-02 | 24  | 14  | 24  | 2  | 0   | 0   | 0   | 0 Hydroxymethylglutaryl-CoA synthase, cytoplasmic OS=Mus musculus GN=Hmgcs1 PE=1 SV=1                     |
| Q9R0P5     | 2.2736E-02 | 14  | 11  | 10  | 3  | 29  | 23  | 18  | 14 Destrin OS=Mus musculus GN=Dstrn PE=1 SV=3                                                             |
| A2APM1     | 2.2903E-02 | 5   | 5   | 7   | 0  | 14  | 10  | 8   | 11 CD44 antigen OS=Mus musculus GN=CD44 PE=1 SV=1                                                         |
| Q9CWB9     | 2.3065E-02 | 92  | 78  | 62  | 36 | 69  | 46  | 31  | 64 Bifunctional purine biosynthesis protein PURH OS=Mus musculus GN=Atic PE=1 SV=2                        |
| A2APM5     | 2.3080E-02 | 5   | 5   | 7   | 0  | 14  | 11  | 8   | 12 CD44 antigen OS=Mus musculus GN=CD44 PE=1 SV=1                                                         |
| O8OX37     | 2.3080E-02 | 5   | 5   | 7   | 0  | 14  | 11  | 8   | 12 CD44 antigen OS=Mus musculus GN=CD44 PE=1 SV=1                                                         |
| A6PWY4     | 2.3586E-02 | 12  | 11  | 19  | 9  | 0   | 0   | 0   | 0 WD repeat-containing protein 76 OS=Mus musculus GN=Wdr76 PE=1 SV=1                                      |
| P10404     | 2.3628E-02 | 20  | 9   | 13  | 9  | 0   | 0   | 0   | 0 MLV-related proviral Env polyprotein OS=Mus musculus PE=1 SV=3                                          |
| Q549C9     | 2.3862E-02 | 25  | 24  | 20  | 2  | 0   | 0   | 0   | 0 Cellular tumor antigen p53 OS=Mus musculus GN=Trp53 PE=1 SV=1                                           |
| P02340     | 2.3862E-02 | 25  | 24  | 20  | 2  | 0   | 0   | 0   | 0 Cellular tumor antigen p53 OS=Mus musculus GN=Trp53 PE=1 SV=3                                           |
| Q80ZA1     | 2.3862E-02 | 25  | 24  | 20  | 2  | 0   | 0   | 0   | 0 Cellular tumor antigen p53 OS=Mus musculus GN=Trp53 PE=1 SV=1                                           |
| I7HIK9     | 2.3862E-02 | 25  | 24  | 20  | 2  | 0   | 0   | 0   | 0 Cellular tumor antigen p53 OS=Mus musculus GN=Trp53 PE=1 SV=1                                           |
| Q5SFO7     | 2.3864E-02 | 6   | 2   | 4   | 0  | 10  | 12  | 7   | 9 Insulin-like growth factor 2 mRNA-binding protein 2 OS=Mus musculus GN=Igf2bp2 PE=1 SV=1                |
| Q9D1M4     | 2.3879E-02 | 9   | 7   | 6   | 5  | 0   | 0   | 0   | 0 Eukaryotic translation elongation factor 1 epsilon-1 OS=Mus musculus GN=Eef1e1 PE=1 SV=1                |
| Q91W50     | 2.4269E-02 | 7   | 4   | 7   | 4  | 0   | 0   | 0   | 0 Cold shock domain-containing protein E1 OS=Mus musculus GN=Csdel PE=1 SV=1                              |
| A6XX       |            |     |     |     |    |     |     |     |                                                                                                           |

|                       |            |     |     |     |    |     |     |     |                                                                                                                          |
|-----------------------|------------|-----|-----|-----|----|-----|-----|-----|--------------------------------------------------------------------------------------------------------------------------|
| G3X9K9                | 2.6066E-02 | 0   | 0   | 9   | 0  | 5   | 12  | 11  | 8 Proteasome activator complex subunit 1 OS=Mus musculus GN=Psm1 PE=1 SV=1                                               |
| P62071                | 2.6161E-02 | 9   | 0   | 3   | 0  | 13  | 13  | 12  | 13 Ras-related protein R-Ras2 OS=Mus musculus GN=Ras2 PE=1 SV=1                                                          |
| Q6ZWV7                | 2.6250E-02 | 0   | 0   | 4   | 0  | 6   | 6   | 4   | 5 60S ribosomal protein L35 OS=Mus musculus GN=Rpl35 PE=1 SV=1                                                           |
| E9Q0K6                | 2.6470E-02 | 30  | 28  | 25  | 3  | 2   | 3   | 0   | 4 Deoxynucleoside triphosphate triphosphohydrolase SAMHD1 OS=Mus musculus GN=Samhd1 PE=1 SV=1                            |
| Q60710                | 2.6988E-02 | 30  | 28  | 27  | 3  | 2   | 3   | 0   | 4 Deoxynucleoside triphosphate triphosphohydrolase SAMHD1 OS=Mus musculus GN=Samhd1 PE=1 SV=1                            |
| F8WJED                | 2.6988E-02 | 30  | 28  | 27  | 3  | 2   | 3   | 0   | 4 Deoxynucleoside triphosphate triphosphohydrolase SAMHD1 OS=Mus musculus GN=Samhd1 PE=1 SV=1                            |
| P07742                | 2.7021E-02 | 116 | 75  | 78  | 1  | 10  | 14  | 0   | 18 Ribonucleoside-diphosphate reductase subunit OS=Mus musculus GN=Rrm1 PE=1 SV=2                                        |
| Q61151                | 2.7081E-02 | 12  | 7   | 8   | 4  | 8   | 0   | 4   | 5 Serine/threonine-protein phosphatase 2A 56 kDa regulatory subunit epsilon isoform OS=Mus musculus GN=Ppp2r5c PE=1 SV=3 |
| P50396                | 2.7088E-02 | 8   | 5   | 4   | 2  | 18  | 19  | 19  | 16 Rab GDP dissociation inhibitor alpha OS=Mus musculus GN=Gdi1 PE=1 SV=3                                                |
| A0A0A6YY91            | 2.7603E-02 | 0   | 4   | 0   | 0  | 9   | 6   | 6   | 8 Neural cell adhesion molecule 1 (Fragment) OS=Mus musculus GN=Ncam1 PE=1 SV=1                                          |
| D3Z279                | 2.7631E-02 | 46  | 31  | 42  | 5  | 18  | 13  | 14  | 12 Cyclin-dependent kinase 1 (Fragment) OS=Mus musculus GN=Cdk1 PE=1 SV=1                                                |
| P59708                | 2.7736E-02 | 0   | 6   | 6   | 0  | 6   | 8   | 7   | 6 Splicing factor 3B subunit 6 OS=Mus musculus GN=Sf3b6 PE=1 SV=1                                                        |
| A2BH06                | 2.7781E-02 | 33  | 28  | 38  | 16 | 24  | 15  | 16  | 22 60S ribosomal protein L11 (Fragment) OS=Mus musculus GN=Rpl11 PE=1 SV=1                                               |
| F6SVV1                | 2.7829E-02 | 12  | 8   | 5   | 3  | 6   | 4   | 3   | 5 Protein Gm9493 OS=Mus musculus GN=Gm9493 PE=4 SV=1                                                                     |
| A0A1B0GR33            | 2.7906E-02 | 26  | 17  | 24  | 4  | 18  | 13  | 12  | 12 40S ribosomal protein S11 OS=Mus musculus GN=Rps11 PE=1 SV=1                                                          |
| P70349                | 2.7930E-02 | 4   | 6   | 8   | 0  | 22  | 12  | 10  | 10 Histidine triad nucleotide-binding protein 1 OS=Mus musculus GN=Hnt1 PE=1 SV=3                                        |
| P11688                | 2.8182E-02 | 5   | 5   | 7   | 0  | 37  | 24  | 24  | 27 Integrin alpha-5 OS=Mus musculus GN=Itga5 PE=1 SV=3                                                                   |
| QR8010                | 2.8209E-02 | 43  | 39  | 42  | 30 | 11  | 0   | 0   | 10 Aminoacyl-tRNA synthetase complex-interacting multifunctional protein 2 OS=Mus musculus GN=Aimp2 PE=1 SV=2            |
| P05064                | 2.8302E-02 | 65  | 75  | 60  | 26 | 133 | 113 | 84  | 105 Fructose-bisphosphate aldolase A OS=Mus musculus GN=Aldoa PE=1 SV=2                                                  |
| Q3TY56                | 2.8352E-02 | 5   | 5   | 3   | 3  | 0   | 0   | 0   | 0 Eukaryotic translation initiation factor 3 subunit K OS=Mus musculus GN=Ef3k PE=1 SV=1                                 |
| P62631                | 2.8516E-02 | 144 | 109 | 133 | 38 | 193 | 198 | 158 | 162 Elongation factor 1-alpha 2 OS=Mus musculus GN=Eef1a2 PE=1 SV=1                                                      |
| QRJZV7                | 2.8676E-02 | 2   | 0   | 4   | 0  | 7   | 6   | 4   | 5 N-acetylglucosamine-6-phosphate deacetylase OS=Mus musculus GN=Amhd2 PE=1 SV=1                                         |
| P01942                | 2.8798E-02 | 0   | 0   | 0   | 0  | 3   | 8   | 4   | 4 Hemoglobin subunit alpha OS=Mus musculus GN=Hba PE=1 SV=2                                                              |
| Q91VB8                | 2.8798E-02 | 0   | 0   | 0   | 0  | 3   | 8   | 4   | 4 Alpha globin 1 OS=Mus musculus GN=haemoglobin alpha 2 PE=1 SV=1                                                        |
| E9Q390                | 2.8964E-02 | 104 | 81  | 83  | 20 | 149 | 139 | 110 | 184 Myofibrin OS=Mus musculus GN=Myof PE=1 SV=2                                                                          |
| A2APM3                | 2.9386E-02 | 5   | 5   | 7   | 0  | 14  | 10  | 8   | 12 CD44 antigen OS=Mus musculus GN=C44 PE=1 SV=1                                                                         |
| A2APM4                | 2.9386E-02 | 5   | 5   | 7   | 0  | 14  | 10  | 8   | 12 CD44 antigen OS=Mus musculus GN=C44 PE=1 SV=1                                                                         |
| A2APM2                | 2.9386E-02 | 5   | 5   | 7   | 0  | 14  | 10  | 8   | 12 CD44 antigen OS=Mus musculus GN=C44 PE=1 SV=1                                                                         |
| E9QKM8                | 2.9386E-02 | 5   | 5   | 7   | 0  | 14  | 10  | 8   | 12 CD44 antigen OS=Mus musculus GN=C44 PE=1 SV=1                                                                         |
| Q3US81                | 2.9386E-02 | 5   | 5   | 7   | 0  | 14  | 10  | 8   | 12 CD44 antigen OS=Mus musculus GN=C44 PE=1 SV=1                                                                         |
| P54754                | 2.9759E-02 | 0   | 0   | 0   | 0  | 5   | 7   | 5   | 6 Ephrin type-B receptor 3 OS=Mus musculus GN=Ephb3 PE=1 SV=2                                                            |
| contaminant_KERATIN06 | 2.9775E-02 | 12  | 6   | 13  | 0  | 19  | 19  | 13  | 8 no description                                                                                                         |
| Q69ZN7                | 2.9905E-02 | 105 | 81  | 83  | 20 | 149 | 139 | 110 | 184 Myofibrin OS=Mus musculus GN=Myof PE=1 SV=2                                                                          |
| P62960                | 3.0311E-02 | 40  | 29  | 27  | 9  | 21  | 15  | 16  | 23 Nuclease-sensitive element-binding protein 1 OS=Mus musculus GN=Ybx1 PE=1 SV=3                                        |
| P17426                | 3.0555E-02 | 8   | 5   | 4   | 0  | 13  | 10  | 5   | 9 AP-2 complex subunit alpha-1 OS=Mus musculus GN=Ap2a1 PE=1 SV=1                                                        |
| P13595                | 3.0679E-02 | 0   | 4   | 0   | 0  | 10  | 6   | 6   | 10 Neural cell adhesion molecule 1 OS=Mus musculus GN=Ncam1 PE=1 SV=3                                                    |
| E9Q0B1                | 3.0679E-02 | 0   | 4   | 0   | 0  | 10  | 6   | 6   | 10 Neural cell adhesion molecule 1 OS=Mus musculus GN=Ncam1 PE=1 SV=1                                                    |
| A0A0A6YY47            | 3.0679E-02 | 0   | 4   | 0   | 0  | 10  | 6   | 6   | 10 Neural cell adhesion molecule 1 OS=Mus musculus GN=Ncam1 PE=1 SV=1                                                    |
| Q05816                | 3.0910E-02 | 5   | 4   | 4   | 0  | 48  | 34  | 8   | 25 Fatty acid-binding protein, epidermal OS=Mus musculus GN=Fabp5 PE=1 SV=3                                              |
| Q64282                | 3.1493E-02 | 2   | 0   | 0   | 0  | 8   | 10  | 13  | 9 Interferon-induced protein with tetratricopeptide repeats 1 OS=Mus musculus GN=Ifr1 PE=1 SV=2                          |
| Q9DBZ5                | 3.1550E-02 | 7   | 7   | 4   | 3  | 5   | 0   | 0   | 3 Eukaryotic translation initiation factor 3 subunit K OS=Mus musculus GN=Ef3k PE=1 SV=1                                 |
| Q3ULG5                | 3.1860E-02 | 55  | 41  | 42  | 10 | 26  | 23  | 16  | 30 DNA helicase OS=Mus musculus GN=Mcm6 PE=1 SV=1                                                                        |
| P97311                | 3.1860E-02 | 55  | 41  | 42  | 10 | 26  | 23  | 16  | 30 DNA replication licensing factor MCM6 OS=Mus musculus GN=Mcm6 PE=1 SV=1                                               |
| Q9ESX5                | 3.2023E-02 | 11  | 10  | 11  | 0  | 22  | 15  | 18  | 18 HA/CA ribonucleoprotein complex subunit 4 OS=Mus musculus GN=Dkc1 PE=1 SV=4                                           |
| Q921M3                | 3.2054E-02 | 16  | 11  | 21  | 4  | 9   | 7   | 8   | 11 Splicing factor 3B subunit 3 OS=Mus musculus GN=Sf3b3 PE=1 SV=1                                                       |
| Q04750                | 3.2434E-02 | 15  | 20  | 22  | 10 | 8   | 8   | 4   | 5 DNA topoisomerase 1 OS=Mus musculus GN=Top1 PE=1 SV=1                                                                  |
| Q61205                | 3.2543E-02 | 0   | 0   | 0   | 0  | 2   | 7   | 4   | 4 Platelet-activating factor acetylhydrolase IB subunit gamma OS=Mus musculus GN=Pafah1b3 PE=1 SV=1                      |
| D3Z7E6                | 3.2543E-02 | 0   | 0   | 0   | 0  | 2   | 7   | 4   | 4 Platelet-activating factor acetylhydrolase IB subunit gamma OS=Mus musculus GN=Pafah1b3 PE=1 SV=1                      |
| Q70194                | 3.2741E-02 | 22  | 16  | 17  | 2  | 15  | 8   | 7   | 5 Eukaryotic translation initiation factor 3 subunit D OS=Mus musculus GN=Ef3d PE=1 SV=2                                 |
| B1AWEO                | 3.2768E-02 | 21  | 15  | 13  | 8  | 7   | 5   | 8   | 11 Clathrin light chain A OS=Mus musculus GN=Cla PE=1 SV=1                                                               |
| B1AWD9                | 3.2768E-02 | 21  | 15  | 13  | 8  | 7   | 5   | 8   | 11 Clathrin light chain A OS=Mus musculus GN=Cla PE=1 SV=1                                                               |
| Q6PFA2                | 3.2768E-02 | 21  | 15  | 13  | 8  | 7   | 5   | 8   | 11 Clathrin light chain A OS=Mus musculus GN=Cla PE=1 SV=1                                                               |
| O08585                | 3.2768E-02 | 21  | 15  | 13  | 8  | 7   | 5   | 8   | 11 Clathrin light chain A OS=Mus musculus GN=Cla PE=1 SV=2                                                               |
| P97371                | 3.2811E-02 | 0   | 0   | 10  | 0  | 5   | 12  | 11  | 8 Proteasome activator complex subunit 1 OS=Mus musculus GN=Psm1 PE=1 SV=2                                               |
| Q0SD44                | 3.3251E-02 | 7   | 9   | 4   | 2  | 2   | 6   | 2   | 5 Eukaryotic translation initiation factor 5B OS=Mus musculus GN=Elf5b PE=1 SV=2                                         |
| Q7TS66                | 3.3599E-02 | 50  | 39  | 38  | 0  | 69  | 72  | 65  | 62 Radixin OS=Mus musculus GN=Rdx PE=1 SV=1                                                                              |
| P05132                | 3.3724E-02 | 3   | 2   | 5   | 0  | 9   | 13  | 5   | 8 cAMP-dependent protein kinase catalytic subunit alpha OS=Mus musculus GN=Prkaa PE=1 SV=3                               |
| Q8VDD5                | 3.3863E-02 | 272 | 183 | 227 | 83 | 409 | 303 | 230 | 305 Myosin-9 OS=Mus musculus GN=Myh9 PE=1 SV=4                                                                           |
| Q4V453                | 3.3950E-02 | 18  | 4   | 14  | 2  | 0   | 0   | 0   | 0 Sister chromatid cohesion protein PDS5 homolog B OS=Mus musculus GN=Pds5b PE=1 SV=1                                    |
| F8WHU5                | 3.3950E-02 | 18  | 4   | 14  | 2  | 0   | 0   | 0   | 0 Sister chromatid cohesion protein PDS5 homolog B OS=Mus musculus GN=Pds5b PE=1 SV=1                                    |
| A0A0A0MQ76            | 3.4142E-02 | 16  | 14  | 18  | 2  | 8   | 4   | 4   | 4 Nucleolar protein 58 OS=Mus musculus GN=Nop58 PE=1 SV=1                                                                |
| Q9CXW4                | 3.4280E-02 | 39  | 30  | 43  | 17 | 30  | 23  | 16  | 27 60S ribosomal protein L11 OS=Mus musculus GN=Rpl11 PE=1 SV=4                                                          |
| E9PYL9                | 3.4280E-02 | 39  | 30  | 43  | 17 | 30  | 23  | 16  | 27 Protein Gm10036 OS=Mus musculus GN=Gm10036 PE=3 SV=1                                                                  |
| QR81F1                | 3.4374E-02 | 22  | 11  | 13  | 4  | 27  | 24  | 19  | 33 Niban-like protein 1 OS=Mus musculus GN=Fam129b PE=1 SV=2                                                             |
| Q01853                | 3.4475E-02 | 45  | 26  | 44  | 11 | 120 | 98  | 42  | 89 Transitional endoplasmic reticulum ATPase OS=Mus musculus GN=Vcp PE=1 SV=4                                            |
| P54761                | 3.4542E-02 | 3   | 0   | 5   | 0  | 4   | 3   | 5   | 3 Ephrin type-B receptor 4 OS=Mus musculus GN=Ephb4 PE=1 SV=2                                                            |
| QR8XK1                | 3.4542E-02 | 3   | 0   | 5   | 0  | 4   | 3   | 5   | 3 Ephrin type-B receptor 4 OS=Mus musculus GN=Ephb4 PE=1 SV=1                                                            |
| E9PWK7                | 3.4542E-02 | 3   | 0   | 5   | 0  | 4   | 3   | 5   | 3 Ephrin type-B receptor 4 OS=Mus musculus GN=Ephb4 PE=1 SV=1                                                            |
| E9PX48                | 3.4680E-02 | 6   | 2   | 5   | 0  | 8   | 9   | 8   | 9 Dedicator of cytokinesis protein 7 OS=Mus musculus GN=Dock7 PE=1 SV=2                                                  |
| P62196                | 3.4697E-02 | 24  | 30  | 28  | 7  | 18  | 13  | 2   | 11 26S protease regulatory subunit 8 OS=Mus musculus GN=Psmc5 PE=1 SV=1                                                  |
| Q640N1                | 3.4719E-02 | 15  | 11  | 16  | 2  | 59  | 60  | 18  | 44 Adipocyte enhancer-binding protein 1 OS=Mus musculus GN=Aebp1 PE=1 SV=1                                               |
| H7BX99                | 3.4770E-02 | 4   | 2   | 3   | 0  | 11  | 16  | 7   | 19 Prothrombin OS=Mus musculus GN=F2 PE=1 SV=1                                                                           |
| P19221                | 3.4770E-02 | 4   | 2   | 3   | 0  | 11  | 16  | 7   | 19 Prothrombin OS=Mus musculus GN=F2 PE=1 SV=1                                                                           |
| Q99JX4                | 3.4798E-02 | 7   | 9   | 2   | 3  | 0   | 0   | 0   | 0 Eukaryotic translation initiation factor 3 subunit M OS=Mus musculus GN=Ef3m PE=1 SV=1                                 |
| E9PXY1                | 3.4984E-02 | 5   | 8   | 12  | 7  | 0   | 0   | 0   | 4 Cullin-4B OS=Mus musculus GN=Cu4b PE=1 SV=2                                                                            |
| A2AA32                | 3.4984E-02 | 5   | 8   | 12  | 7  | 0   | 0   | 0   | 4 Cullin-4B OS=Mus musculus GN=Cu4b PE=1 SV=1                                                                            |
| QR8L16                | 3.5440E-02 | 3   | 2   | 12  | 13 | 15  | 15  | 15  | 14 Splicing factor, proline- and glutamine-rich OS=Mus musculus GN=Sfpq PE=1 SV=1                                        |
| Q9PCN8                | 3.5556E-02 | 0   | 0   | 0   | 0  | 13  | 14  | 3   | 6 Insulin-like growth factor 2 mRNA-binding protein 3 OS=Mus musculus GN=Igf2bp3 PE=1 SV=1                               |
| Q61171                | 3.5908E-02 | 7   | 2   | 8   | 0  | 32  | 28  | 9   | 28 Peroxiredoxin-2 OS=Mus musculus GN=Prdx2 PE=1 SV=3                                                                    |
| P62274                | 3.6006E-02 | 6   | 9   | 6   | 3  | 4   | 0   | 0   | 0 40S ribosomal protein S29 OS=Mus musculus GN=Rps29 PE=3 SV=2                                                           |
| E9PWG6                | 3.6139E-02 | 9   | 8   | 6   | 5  | 0   | 2   | 2   | 2 Protein Ncap OS=Mus musculus GN=Ncap PE=1 SV=1                                                                         |
| A0A0G2JE0             | 3.6260E-02 | 0   | 0   | 0   | 0  | 12  | 4   | 2   | 6 PDZ and LIM domain protein 5 (Fragment) OS=Mus musculus GN=Pdlim5 PE=1 SV=1                                            |
| Q91WK2                | 3.6437E-02 | 6   | 6   | 5   | 2  | 3   | 5   | 0   | 5 Eukaryotic translation initiation factor 3 subunit H OS=Mus musculus GN=Ef3h PE=1 SV=1                                 |
| P33434                | 3.6570E-02 | 0   | 0   | 0   | 0  | 4   | 9   | 3   | 4 72 kDa type IV collagenase OS=Mus musculus GN=Mmp2 PE=1 SV=1                                                           |
| A2AKI5                | 3.6733E-02 | 4   | 2   | 0   | 3  | 28  | 19  | 20  | 15 Integrin alpha-V OS=Mus musculus GN=ItgaV PE=1 SV=1                                                                   |
| P43406                | 3.6733E-02 | 4   | 2   | 0   | 3  | 28  | 19  | 20  | 15 Integrin alpha-V OS=Mus musculus GN=ItgaV PE=1 SV=2                                                                   |
| Q61768                | 3.6797E-02 | 18  | 21  | 24  | 7  | 16  | 13  | 6   | 10 Kinesin-1 heavy chain OS=Mus musculus GN=Kif5b PE=1 SV=3                                                              |
| Q91VC3                | 3.6945E-02 | 53  | 33  | 43  | 9  | 14  | 24  | 12  | 21 Eukaryotic initiation factor 4A-III OS=Mus musculus GN=Ef4a3 PE=1 SV=3                                                |
| QRJM76                | 3.7036E-02 | 34  | 21  | 25  | 16 | 20  | 8   | 0   | 9 Actin-related protein 2/3 complex subunit 3 OS=Mus musculus GN=Arp3 PE=1 SV=3                                          |
| E9QN08                | 3.8124E-02 | 2   | 5   | 5   | 0  | 15  | 7   | 10  | 12 Elongation factor 1-delta (Fragment) OS=Mus musculus GN=Eef1d PE=1 SV=1                                               |
| Q9CR16                | 3.8303E-02 | 12  | 8   | 6   | 31 | 16  | 14  | 14  | 24 Peptidyl-prolyl cis-trans isomerase D OS=Mus musculus GN=Ppid PE=1 SV=3                                               |
| Q99LC2                | 3.8367E-02 | 4   | 3   | 4   | 2  | 0   | 0   | 2   | 0 Cleavage stimulation factor subunit 1 OS=Mus musculus GN=Cstf1 PE=1 SV=1                                               |
| P60122                | 3.8886E-02 | 50  | 33  | 37  | 18 | 37  | 20  | 21  | 27 RuvB-like 1 OS=Mus musculus GN=Ruvbl1 PE=1 SV=1                                                                       |
| P23206                | 3.8993E-02 | 17  | 13  | 26  | 5  | 11  | 11  | 9   | 5 DNA replication licensing factor MCM3 OS=Mus musculus GN=Mcm3 PE=1 SV=2                                                |
| Q80T06                | 3.9441E-02 | 2   | 5   | 5   | 0  | 16  | 7   | 10  | 12 Elongation factor 1-delta OS=Mus musculus GN=Eef1d PE=1 SV=1                                                          |
| P57776                | 3.9441E-02 | 2   | 5   | 5   | 0  | 16  | 7   | 10  | 12 Elongation factor 1-delta OS=Mus musculus GN=Eef1d PE=1 SV=3                                                          |
| A0A0R41HE2            | 3.9441E-02 | 2   | 5   | 5   | 0  | 16  | 7   | 10  | 12 Elongation factor 1-delta OS=Mus musculus GN=Eef1d PE=1 SV=1                                                          |
| R03018                | 3.9641E-02 | 161 | 123 | 144 | 68 | 99  | 88  | 82  | 103 T-complex protein 1 subunit gamma OS=Mus musculus GN=Ctg3 PE=1 SV=1                                                  |
| A2A9M4                | 3.9855E-02 | 6   | 2   | 5   | 0  | 8   | 9   | 8   | 10 Dedicator of cytokinesis protein 7 OS=Mus musculus GN=Dock7 PE=1 SV=2                                                 |
| A2A9M5                | 3.9855E-02 | 6   | 2   | 5   | 0  | 8   | 9   | 8   | 10 Dedicator of cytokinesis protein 7 OS=Mus musculus GN=Dock7 PE=1 SV=1                                                 |
| A0A0U1RNK7            | 3.9855E-02 | 6   | 2   | 5   | 0  | 8   | 9   | 8   | 10 Dedicator of cytokinesis protein 7 OS=Mus musculus GN=Dock7 PE=1 SV=1                                                 |
| QR8LA4                | 3.9855E-02 | 6   | 2   | 5   | 0  | 8   | 9   | 8   | 10 Dedicator of cytokinesis protein 7 OS=Mus musculus GN=Dock7 PE=1 SV=3                                                 |
| Q99LX0                | 3.9922E-02 | 2   | 0   | 0   | 0  | 4   | 8   | 7   | 13 Protein deglycase DJ-1 OS=Mus musculus GN=Park7 PE=1 SV=1                                                             |
| Q9CQ60                | 4.0113E-02 | 0   | 0   | 0   | 0  | 14  | 9   | 2   | 5 6-phosphogluconolactonase OS=Mus musculus GN=Pgl3 PE=1 SV=1                                                            |
| Q61990                | 4.0220E-02 | 24  | 17  | 16  | 4  | 18  | 12  | 8   | 13 Poly(rC)-binding protein 2 OS=Mus musculus GN=Pcbp2 PE=1 SV=1                                                         |
| Q35130                | 4.0394E-02 | 3   | 3   | 7   | 3  | 0   | 0   | 0   | 0 Ribosomal RNA small subunit methyltransferase NEP1 OS=Mus musculus GN=Emg1 PE=1 SV=1                                   |
| QR81B4                | 4.0790E-02 | 41  | 27  | 38  | 9  | 30  | 26  | 21  | 28 Eukaryotic translation initiation factor 3 subunit C OS=Mus musculus GN=Ef3c PE=1 SV=1                                |
| Q6PEP1                | 4.0997E-02 | 20  | 22  | 24  | 11 | 17  | 16  | 10  | 19 U5 small nuclear ribonucleoprotein 40 kDa protein OS=Mus musculus GN=Smp40 PE=1 SV=1                                  |
| Q9WU78                | 4.1530E-02 | 88  | 65  | 57  | 17 | 107 | 83  | 68  | 95 Programmed cell death 6-interacting protein OS=Mus musculus GN=Pdc6ip PE=1 SV=3                                       |
| Q6R017                | 4.2890E-02 | 30  | 19  | 25  | 7  | 20  | 17  | 10  | 21 Guanine nucleotide-binding protein G(s) subunit alpha isoforms XLas OS=Mus musculus GN=Gnas PE=1 SV=1                 |
| P63094                | 4.2890E-02 | 30  | 19  | 25  | 7  | 20  | 17  | 10  | 21 Guanine nucleotide-binding protein G(s) subunit alpha isoforms short OS=Mus musculus GN=Gnas PE=1 SV=1                |
| G3X8Y3                | 4.3003E-02 | 72  | 61  | 65  | 31 | 43  | 33  | 39  | 40 N-alpha-acetyltransferase 15, NatA auxiliary subunit OS=Mus musculus GN=Naa15 PE=1 SV=1                               |
| P57780                | 4.3193E-02 | 46  | 42  | 31  | 7  | 76  | 53  | 40  | 66 Alpha-actinin-4 OS=Mus musculus GN=Act4 PE=1 SV=1                                                                     |
| E9Q715                | 4.3194E-02 | 3   | 3   | 5   | 2  | 2   | 0   | 0   | 0 Putative RNA-binding protein Luc7-like 2 OS=Mus musculus GN=Luc7l2 PE=1 SV=1                                           |
| F6WHQ7                | 4.3269E-02 | 5   | 0   | 0   | 0  | 6   | 6   | 4   | 7 Glutathione S-transferase Mu 1 (Fragment) OS=Mus musculus GN=Gstm1 PE=1 SV=1                                           |
| A0A1B0GSX0            | 4.3670E-02 | 28  | 20  | 20  | 14 | 52  | 36  | 31  | 51 L-lact                                                                                                                |

|             |            |    |    |    |    |    |    |    |                                                                                                                                                     |
|-------------|------------|----|----|----|----|----|----|----|-----------------------------------------------------------------------------------------------------------------------------------------------------|
| A2AGT5      | 4.8740E-02 | 5  | 3  | 4  | 4  | 0  | 0  | 0  | 2 Cytoskeleton-associated protein 5 OS=Mus musculus GN=Ckap5 PE=1 SV=1                                                                              |
| Z4YL78      | 4.8740E-02 | 5  | 3  | 4  | 4  | 0  | 0  | 0  | 2 Cytoskeleton-associated protein 5 OS=Mus musculus GN=Ckap5 PE=1 SV=1                                                                              |
| K3W4R5      | 4.8740E-02 | 5  | 3  | 4  | 4  | 0  | 0  | 0  | 2 Cytoskeleton-associated protein 5 OS=Mus musculus GN=Ckap5 PE=1 SV=1                                                                              |
| A0A0R4J0K2  | 4.8740E-02 | 5  | 3  | 4  | 4  | 0  | 0  | 0  | 2 Cytoskeleton-associated protein 5 OS=Mus musculus GN=Ckap5 PE=1 SV=1                                                                              |
| P62281      | 4.9547E-02 | 29 | 21 | 28 | 5  | 22 | 18 | 12 | 15 40S ribosomal protein S11 OS=Mus musculus GN=Rps11 PE=1 SV=3                                                                                     |
| Q9WUM3      | 5.0923E-02 | 13 | 6  | 10 | 0  | 16 | 27 | 18 | 24 Coronin-1B OS=Mus musculus GN=Coro1b PE=1 SV=1                                                                                                   |
| Q9Z2J0      | 5.0970E-02 | 7  | 0  | 5  | 0  | 10 | 7  | 6  | 10 Proteasome subunit alpha type-7 OS=Mus musculus GN=Psmg7 PE=1 SV=1                                                                               |
| Q9QZD9      | 5.1734E-02 | 41 | 35 | 38 | 5  | 16 | 13 | 8  | 16 Eukaryotic translation initiation factor 3 subunit I OS=Mus musculus GN=Elf3 PE=1 SV=1                                                           |
| Q8CFI7      | 5.1872E-02 | 30 | 25 | 27 | 4  | 12 | 6  | 2  | 12 DNA-directed RNA polymerase II subunit RPB2 OS=Mus musculus GN=Polr2b PE=1 SV=2                                                                  |
| Q61398      | 5.2622E-02 | 90 | 47 | 44 | 19 | 43 | 34 | 28 | 41 Procollagen C-endopeptidase enhancer 1 OS=Mus musculus GN=Poclec PE=1 SV=2                                                                       |
| Q9WV32      | 5.3215E-02 | 42 | 33 | 38 | 7  | 34 | 19 | 12 | 20 Actin-related protein 2/3 complex subunit 1B OS=Mus musculus GN=Arpc1b PE=1 SV=4                                                                 |
| Q9WUA3      | 5.3466E-02 | 17 | 18 | 22 | 3  | 6  | 5  | 0  | 7 ATP-dependent 6-phosphofructokinase, platelet type OS=Mus musculus GN=Pfkp PE=1 SV=1                                                              |
| Q8C605      | 5.3466E-02 | 17 | 18 | 22 | 3  | 6  | 5  | 0  | 7 ATP-dependent 6-phosphofructokinase OS=Mus musculus GN=Pfkp PE=1 SV=1                                                                             |
| P47857      | 5.3649E-02 | 17 | 10 | 18 | 3  | 6  | 10 | 5  | 4 ATP-dependent 6-phosphofructokinase, muscle type OS=Mus musculus GN=PfkM PE=1 SV=3                                                                |
| P17742      | 5.3917E-02 | 52 | 27 | 25 | 0  | 77 | 59 | 30 | 62 Peptidyl-prolyl cis-trans isomerase A OS=Mus musculus GN=Ppia PE=1 SV=2                                                                          |
| Q9Z2I7      | 5.4312E-02 | 8  | 8  | 5  | 0  | 13 | 10 | 9  | 9 MCG13402, isoform CRA_c OS=Mus musculus GN=Pfbp1 PE=1 SV=1                                                                                        |
| Q8BGJ5      | 5.4782E-02 | 8  | 8  | 5  | 0  | 13 | 10 | 8  | 9 MCG13402, isoform CRA_n OS=Mus musculus GN=Pfbp1 PE=1 SV=1                                                                                        |
| Q8IUM3      | 5.5019E-02 | 69 | 61 | 61 | 31 | 41 | 31 | 38 | 37 N-alpha-acetyltransferase 15, Naa auxiliary subunit OS=Mus musculus GN=Naa15 PE=1 SV=1                                                           |
| F7ACA26     | 5.5925E-02 | 21 | 20 | 25 | 9  | 40 | 45 | 24 | 37 F-actin-capping protein subunit beta (Fragment) OS=Mus musculus GN=Capzb PE=1 SV=1                                                               |
| Q9D019      | 5.6114E-02 | 50 | 39 | 37 | 10 | 33 | 27 | 19 | 34 Arginine-tRNA ligase, cytoplasmic OS=Mus musculus GN=Rars PE=1 SV=2                                                                              |
| G3UYZ1      | 5.6359E-02 | 0  | 5  | 0  | 0  | 14 | 6  | 11 | 12 Immunoglobulin superfamily member 8 OS=Mus musculus GN=Igsf8 PE=1 SV=1                                                                           |
| Q8R366      | 5.6359E-02 | 0  | 5  | 0  | 0  | 14 | 6  | 11 | 12 Immunoglobulin superfamily member 8 OS=Mus musculus GN=Igsf8 PE=1 SV=2                                                                           |
| A0A0R4I117  | 5.6359E-02 | 0  | 5  | 0  | 0  | 14 | 6  | 11 | 12 Immunoglobulin superfamily member 8 OS=Mus musculus GN=Igsf8 PE=1 SV=1                                                                           |
| O55023      | 5.6507E-02 | 4  | 3  | 5  | 0  | 13 | 8  | 4  | 7 Inositol monophosphatase 1 OS=Mus musculus GN=Impa1 PE=1 SV=1                                                                                     |
| Q9CQ65      | 5.7506E-02 | 26 | 17 | 24 | 3  | 43 | 37 | 19 | 33 S-methyl-5'-thioadenosine phosphorylase OS=Mus musculus GN=Mtap PE=1 SV=1                                                                        |
| Q8C253      | 5.7683E-02 | 26 | 13 | 17 | 3  | 32 | 41 | 21 | 33 Galectin OS=Mus musculus GN=Lgals3 PE=1 SV=1                                                                                                     |
| O86804      | 5.8169E-02 | 0  | 0  | 0  | 0  | 7  | 5  | 4  | 0 Retinoic acid early-inducible protein 1-gamma OS=Mus musculus GN=Rae1c PE=1 SV=1                                                                  |
| P70336      | 5.8329E-02 | 9  | 7  | 7  | 0  | 0  | 0  | 0  | 0 Rho-associated protein kinase 2 OS=Mus musculus GN=Rock2 PE=1 SV=1                                                                                |
| P19157      | 5.8350E-02 | 20 | 19 | 16 | 8  | 19 | 12 | 0  | 19 Glutathione S-transferase P 1 OS=Mus musculus GN=Gstp1 PE=1 SV=2                                                                                 |
| Q91Z25      | 5.8410E-02 | 42 | 33 | 38 | 7  | 35 | 18 | 12 | 20 Actin-related protein 2/3 complex subunit 1B OS=Mus musculus GN=Arpc1b PE=1 SV=1                                                                 |
| Q9ERU9      | 5.8426E-02 | 6  | 4  | 5  | 0  | 0  | 0  | 0  | 0 E3 SUMO-protein ligase RanBP2 OS=Mus musculus GN=Ranbp2 PE=1 SV=2                                                                                 |
| Q91V35      | 5.8492E-02 | 0  | 0  | 0  | 0  | 3  | 0  | 2  | 3 Receptor-type tyrosine-protein phosphatase OS=Mus musculus GN=Ptpa PE=1 SV=1                                                                      |
| F65DD7      | 5.8501E-02 | 4  | 3  | 3  | 0  | 0  | 0  | 0  | 0 DNA topoisomerase (Fragment) OS=Mus musculus GN=Top3b PE=1 SV=1                                                                                   |
| O88792      | 5.8501E-02 | 4  | 3  | 3  | 0  | 0  | 0  | 0  | 0 Junctional adhesion molecule A OS=Mus musculus GN=F11r PE=1 SV=2                                                                                  |
| A2RTH5      | 5.8501E-02 | 4  | 3  | 3  | 0  | 0  | 0  | 0  | 0 Leucine carboxyl methyltransferase 1 OS=Mus musculus GN=Lcm11 PE=1 SV=1                                                                           |
| A0A0U11RNF2 | 5.8501E-02 | 4  | 3  | 3  | 0  | 0  | 0  | 0  | 0 Protein Lcm11 OS=Mus musculus GN=Lcm11 PE=1 SV=1                                                                                                  |
| E9PV04      | 5.8565E-02 | 50 | 0  | 43 | 9  | 14 | 0  | 12 | 0 Protein Gm8994 OS=Mus musculus GN=Gm8994 PE=3 SV=2                                                                                                |
| P12178      | 5.8728E-02 | 8  | 9  | 11 | 2  | 4  | 5  | 0  | 4 Guanine nucleotide-binding protein subunit alpha-11 OS=Mus musculus GN=Gna11 PE=1 SV=1                                                            |
| Q9D8U8      | 5.8802E-02 | 0  | 0  | 0  | 0  | 4  | 3  | 0  | 3 Sorting nexin-5 OS=Mus musculus GN=Snx5 PE=1 SV=1                                                                                                 |
| Q3T192      | 5.8920E-02 | 0  | 0  | 0  | 0  | 39 | 29 | 0  | 29 Dihydropyrimidinase-related protein 3 OS=Mus musculus GN=Dpys3 PE=1 SV=1                                                                         |
| D3Z2H9      | 5.8939E-02 | 27 | 26 | 25 | 13 | 57 | 53 | 39 | 45 Protein Tpm3-rs7 OS=Mus musculus GN=Tpm3-rs7 PE=3 SV=1                                                                                           |
| Q76M23      | 5.8950E-02 | 80 | 46 | 74 | 25 | 69 | 48 | 34 | 59 Serine/threonine-protein phosphatase 2A 65 kDa regulatory subunit A alpha isoform OS=Mus musculus GN=Ppp2r1a PE=1 SV=3                           |
| A0A0J9YUZ4  | 5.8986E-02 | 8  | 8  | 8  | 0  | 9  | 15 | 12 | 11 High mobility group protein B1 (Fragment) OS=Mus musculus GN=Hmgb1 PE=1 SV=1                                                                     |
| P63158      | 5.8986E-02 | 8  | 8  | 8  | 0  | 9  | 15 | 12 | 11 High mobility group protein B1 OS=Mus musculus GN=Hmgb1 PE=1 SV=2                                                                                |
| Q6PAV2      | 5.9002E-02 | 7  | 5  | 5  | 0  | 0  | 0  | 0  | 0 Probable E3 ubiquitin-protein ligase HERC4 OS=Mus musculus GN=Herc4 PE=1 SV=2                                                                     |
| Q9DC48      | 5.9003E-02 | 4  | 5  | 4  | 0  | 0  | 2  | 0  | 0 Pre-mRNA-processing factor 17 OS=Mus musculus GN=Cle40 PE=2 SV=1                                                                                  |
| P17563      | 5.9096E-02 | 15 | 13 | 15 | 0  | 0  | 0  | 0  | 0 Scleritin-binding protein 1 OS=Mus musculus GN=Sclerbp1 PE=1 SV=2                                                                                 |
| FSWID5      | 5.9205E-02 | 27 | 28 | 0  | 0  | 49 | 37 | 32 | 33 Tropomyosin alpha-1 chain OS=Mus musculus GN=Tpm1 PE=1 SV=1                                                                                      |
| P11440      | 5.9279E-02 | 78 | 49 | 57 | 5  | 26 | 19 | 15 | 17 Cyclin-dependent kinase 1 OS=Mus musculus GN=Cdk1 PE=1 SV=3                                                                                      |
| Q60716      | 5.9372E-02 | 0  | 0  | 0  | 0  | 4  | 3  | 2  | 0 Prolyl 4-hydroxylase subunit alpha-2 OS=Mus musculus GN=P4ha2 PE=1 SV=1                                                                           |
| Q5SX75      | 5.9372E-02 | 0  | 0  | 0  | 0  | 4  | 3  | 2  | 0 Procollagen-proline, 2-oxoglutarate 4-dioxygenase (Proline 4-hydroxylase), alpha II polypeptide, isoform CRA_f OS=Mus musculus GN=P4ha2 PE=1 SV=1 |
| Q61391      | 5.9404E-02 | 0  | 0  | 0  | 0  | 4  | 3  | 0  | 4 Nephrysin OS=Mus musculus GN=Mme PE=1 SV=3                                                                                                        |
| A0A0G2JH04  | 5.9457E-02 | 17 | 9  | 18 | 9  | 0  | 10 | 0  | 13 Eukaryotic translation initiation factor 4E OS=Mus musculus GN=Elf4e PE=1 SV=1                                                                   |
| Q921D0      | 5.9505E-02 | 4  | 3  | 4  | 0  | 0  | 0  | 0  | 0 Annexin OS=Mus musculus GN=Anxa8 PE=1 SV=1                                                                                                        |
| Q9Z321      | 5.9505E-02 | 4  | 3  | 4  | 0  | 0  | 0  | 0  | 0 DNA topoisomerase 3-beta-1 OS=Mus musculus GN=Top3b PE=1 SV=1                                                                                     |
| F63XL5      | 5.9606E-02 | 0  | 0  | 0  | 0  | 7  | 5  | 0  | 5 6-phosphogluconolactonase (Fragment) OS=Mus musculus GN=Pgl6 PE=1 SV=1                                                                            |
| A2AW41      | 5.9822E-02 | 5  | 0  | 5  | 0  | 10 | 5  | 4  | 7 Protein Hnmp1 (Fragment) OS=Mus musculus GN=Hnmp1 PE=1 SV=1                                                                                       |
| Q5SWU9      | 5.9992E-02 | 29 | 16 | 28 | 6  | 10 | 14 | 10 | 16 Acetyl-CoA carboxylase 1 OS=Mus musculus GN=Acaca PE=1 SV=1                                                                                      |

Table S3. Shown here are 79 protein fractions expressed exclusively in isolated EVs from WT (ciliated cells) after inducing the release of ciliary vesicle by fluid-shear flow.

| Accession  | T-test p-value | Spectral count for ciliated EV (WT) |         |         |         | Spectral count for non-ciliated EV (KO) |         |         |         | Description                                                                                                            |
|------------|----------------|-------------------------------------|---------|---------|---------|-----------------------------------------|---------|---------|---------|------------------------------------------------------------------------------------------------------------------------|
|            |                | Sample1                             | Sample2 | Sample3 | Sample4 | Sample1                                 | Sample2 | Sample3 | Sample4 |                                                                                                                        |
| Q05DV1     | 2.042E-04      | 18.99                               | 20.01   | 23.4    | 20.67   | 0                                       | 0       | 0       | 0       | 0 NADPH-cytochrome P450 reductase OS=Mus musculus GN=Por PE=1 SV=1                                                     |
| AOA1B0GR11 | 3.115E-04      | 18.99                               | 24.22   | 20.59   | 20.67   | 0                                       | 0       | 0       | 0       | 0 Transaldolase OS=Mus musculus GN=Taldo1 PE=1 SV=1                                                                    |
| Q93092     | 3.115E-04      | 18.99                               | 24.22   | 20.59   | 20.67   | 0                                       | 0       | 0       | 0       | 0 Transaldolase OS=Mus musculus GN=Taldo1 PE=1 SV=2                                                                    |
| Q9CYN9     | 4.182E-04      | 13.45                               | 15.8    | 16.85   | 17.71   | 0                                       | 0       | 0       | 0       | 0 Renin receptor OS=Mus musculus GN=Atp6ap2 PE=1 SV=2                                                                  |
| Q80W65     | 7.985E-04      | 11.87                               | 10.53   | 12.17   | 14.76   | 0                                       | 0       | 0       | 0       | 0 Proprotein convertase subtilisin/kexin type 9 OS=Mus musculus GN=Pesk9 PE=1 SV=2                                     |
| P37040     | 9.213E-04      | 18.99                               | 20.01   | 26.2    | 20.67   | 0                                       | 0       | 0       | 0       | 0 NADPH-cytochrome P450 reductase OS=Mus musculus GN=Por PE=1 SV=2                                                     |
| Q01320     | 1.024E-03      | 49.86                               | 51.6    | 45.86   | 64.95   | 0                                       | 0       | 0       | 0       | 0 DNA topoisomerase 2-alpha OS=Mus musculus GN=Top2a PE=1 SV=2                                                         |
| Q99P88     | 1.047E-03      | 6.332                               | 7.371   | 6.551   | 8.857   | 0                                       | 0       | 0       | 0       | 0 Nuclear pore complex protein Nup155 OS=Mus musculus GN=Nup155 PE=1 SV=1                                              |
| Q9Z2V5     | 1.225E-03      | 3.957                               | 5.265   | 5.615   | 5.904   | 0                                       | 0       | 0       | 0       | 0 Histone deacetylase 6 OS=Mus musculus GN=Hdac6 PE=1 SV=3                                                             |
| AOA1B0GX25 | 1.225E-03      | 3.957                               | 5.265   | 5.615   | 5.904   | 0                                       | 0       | 0       | 0       | 0 Histone deacetylase 6 (Fragment) OS=Mus musculus GN=Hdac6 PE=1 SV=1                                                  |
| Q810B6     | 1.268E-03      | 3.957                               | 5.265   | 4.679   | 5.904   | 0                                       | 0       | 0       | 0       | 0 Rabankyrin-5 OS=Mus musculus GN=Anky1 PE=1 SV=2                                                                      |
| Q9Z1T1     | 1.433E-03      | 7.123                               | 7.371   | 10.29   | 8.857   | 0                                       | 0       | 0       | 0       | 0 AP-3 complex subunit beta-1 OS=Mus musculus GN=Ap3b1 PE=1 SV=2                                                       |
| P19001     | 1.570E-03      | 12.66                               | 10.53   | 15.91   | 11.81   | 0                                       | 0       | 0       | 0       | 0 Keratin, type I cytoskeletal 19 OS=Mus musculus GN=Krt19 PE=1 SV=1                                                   |
| F8VPK5     | 1.956E-03      | 8.706                               | 9.477   | 7.487   | 11.81   | 0                                       | 0       | 0       | 0       | 0 Rho-associated protein kinase OS=Mus musculus GN=Rock2 PE=1 SV=1                                                     |
| Q61001     | 2.110E-03      | 44.32                               | 34.73   | 36.5    | 53.14   | 0                                       | 0       | 0       | 0       | 0 Laminin subunit alpha-5 OS=Mus musculus GN=Lama5 PE=1 SV=1                                                           |
| O35566     | 2.948E-03      | 34.82                               | 46.33   | 57.09   | 38.38   | 0                                       | 0       | 0       | 0       | 0 CD151 antigen OS=Mus musculus GN=Cd151 PE=1 SV=2                                                                     |
| AOA1B0GRG3 | 3.122E-03      | 32.45                               | 44.23   | 55.22   | 38.38   | 0                                       | 0       | 0       | 0       | 0 CD151 antigen (Fragment) OS=Mus musculus GN=Cd151 PE=1 SV=1                                                          |
| Q8R480     | 3.317E-03      | 5.54                                | 4.212   | 7.487   | 5.904   | 0                                       | 0       | 0       | 0       | 0 Nuclear pore complex protein Nup85 OS=Mus musculus GN=Nup85 PE=1 SV=1                                                |
| A2AW05     | 3.781E-03      | 4.749                               | 3.159   | 4.679   | 5.904   | 0                                       | 0       | 0       | 0       | 0 FACT complex subunit SSRP1 (Fragment) OS=Mus musculus GN=Ssrp1 PE=1 SV=1                                             |
| Q08943     | 3.781E-03      | 4.749                               | 3.159   | 4.679   | 5.904   | 0                                       | 0       | 0       | 0       | 0 FACT complex subunit SSRP1 OS=Mus musculus GN=Ssrp1 PE=1 SV=2                                                        |
| P58854     | 4.033E-03      | 3.166                               | 5.265   | 5.615   | 5.904   | 0                                       | 0       | 0       | 0       | 0 Gamma-tubulin complex component 3 OS=Mus musculus GN=Tubgcp3 PE=1 SV=2                                               |
| Q6P5D8     | 4.176E-03      | 13.45                               | 9.477   | 15.91   | 17.71   | 0                                       | 0       | 0       | 0       | 0 Structural maintenance of chromosomes flexible hinge domain-containing protein 1 OS=Mus musculus GN=Smchd1 PE=1 SV=2 |
| Q9JHK4     | 4.442E-03      | 7.915                               | 8.424   | 6.551   | 11.81   | 0                                       | 0       | 0       | 0       | 0 Geranylgeranyl transferase type-2 subunit alpha OS=Mus musculus GN=Rabgta3 PE=1 SV=1                                 |
| AOA0R4J233 | 5.084E-03      | 6.332                               | 8.424   | 12.17   | 8.857   | 0                                       | 0       | 0       | 0       | 0 Septin-10 OS=Mus musculus GN=Sept10 PE=1 SV=1                                                                        |
| Q8C650     | 5.084E-03      | 6.332                               | 8.424   | 12.17   | 8.857   | 0                                       | 0       | 0       | 0       | 0 Septin-10 OS=Mus musculus GN=Sept10 PE=1 SV=1                                                                        |
| Q9WUW7     | 5.388E-03      | 8.706                               | 6.318   | 7.487   | 11.81   | 0                                       | 0       | 0       | 0       | 0 Cathepsin Z OS=Mus musculus GN=Ctsz PE=1 SV=1                                                                        |
| Q9WTZ2     | 5.895E-03      | 3.957                               | 3.159   | 3.743   | 5.904   | 0                                       | 0       | 0       | 0       | 0 Membrane-bound transcription factor site-1 protease OS=Mus musculus GN=Mbtps1 PE=1 SV=1                              |
| E9Q3L1     | 6.679E-03      | 4.749                               | 9.477   | 7.487   | 5.904   | 0                                       | 0       | 0       | 0       | 0 Unconventional myosin-VI OS=Mus musculus GN=Myo6 PE=1 SV=1                                                           |
| V9GXM4     | 6.679E-03      | 4.749                               | 9.477   | 7.487   | 5.904   | 0                                       | 0       | 0       | 0       | 0 Unconventional myosin-VI OS=Mus musculus GN=Myo6 PE=1 SV=1                                                           |
| V9GX76     | 6.679E-03      | 4.749                               | 9.477   | 7.487   | 5.904   | 0                                       | 0       | 0       | 0       | 0 Unconventional myosin-VI OS=Mus musculus GN=Myo6 PE=1 SV=1                                                           |
| E9PVU0     | 6.679E-03      | 4.749                               | 9.477   | 7.487   | 5.904   | 0                                       | 0       | 0       | 0       | 0 Unconventional myosin-VI OS=Mus musculus GN=Myo6 PE=1 SV=1                                                           |
| E9Q175     | 6.679E-03      | 4.749                               | 9.477   | 7.487   | 5.904   | 0                                       | 0       | 0       | 0       | 0 Unconventional myosin-VI OS=Mus musculus GN=Myo6 PE=1 SV=1                                                           |
| E9Q174     | 6.679E-03      | 4.749                               | 9.477   | 7.487   | 5.904   | 0                                       | 0       | 0       | 0       | 0 Unconventional myosin-VI OS=Mus musculus GN=Myo6 PE=1 SV=1                                                           |
| P98063     | 7.098E-03      | 42.74                               | 57.92   | 48.66   | 82.66   | 0                                       | 0       | 0       | 0       | 0 Bone morphogenetic protein 1 OS=Mus musculus GN=Bmp1 PE=1 SV=2                                                       |
| Q92Q08     | 7.214E-03      | 5.54                                | 4.212   | 2.808   | 5.904   | 0                                       | 0       | 0       | 0       | 0 Influenza virus NS1A-binding protein homolog OS=Mus musculus GN=Ivns1abp PE=1 SV=2                                   |
| P43346     | 8.144E-03      | 12.66                               | 12.64   | 5.615   | 11.81   | 0                                       | 0       | 0       | 0       | 0 Deoxycytidine kinase OS=Mus musculus GN=Dck PE=1 SV=1                                                                |
| Q6P5B0     | 9.106E-03      | 6.332                               | 11.58   | 7.487   | 5.904   | 0                                       | 0       | 0       | 0       | 0 RRP12-like protein OS=Mus musculus GN=Rrp12 PE=1 SV=1                                                                |
| P11370     | 9.215E-03      | 10.29                               | 10.53   | 5.615   | 5.904   | 0                                       | 0       | 0       | 0       | 0 Retrovirus-related Env polyprotein from Fv-4 locus OS=Mus musculus GN=Fv4 PE=1 SV=2                                  |
| Q8VC28     | 9.903E-03      | 5.54                                | 8.424   | 6.551   | 11.81   | 0                                       | 0       | 0       | 0       | 0 Aldo-keto reductase family 1 member C13 OS=Mus musculus GN=Akr1c13 PE=1 SV=2                                         |
| G3X934     | 9.949E-03      | 10.29                               | 15.8    | 14.97   | 23.62   | 0                                       | 0       | 0       | 0       | 0 MCG115964 OS=Mus musculus GN=Wdr70 PE=1 SV=1                                                                         |
| Q57119     | 1.063E-02      | 4.749                               | 4.212   | 7.487   | 8.857   | 0                                       | 0       | 0       | 0       | 0 Aldehyde dehydrogenase family 16 member A1 OS=Mus musculus GN=Aldh16a1 PE=1 SV=2                                     |
| AOA1B0GSU0 | 1.063E-02      | 4.749                               | 4.212   | 7.487   | 8.857   | 0                                       | 0       | 0       | 0       | 0 Aldehyde dehydrogenase family 16 member A1 OS=Mus musculus GN=Aldh16a1 PE=1 SV=1                                     |
| D3Z0B9     | 1.063E-02      | 4.749                               | 4.212   | 7.487   | 8.857   | 0                                       | 0       | 0       | 0       | 0 Aldehyde dehydrogenase family 16 member A1 OS=Mus musculus GN=Aldh16a1 PE=1 SV=3                                     |
| P43276     | 1.065E-02      | 8.706                               | 8.424   | 16.85   | 14.76   | 0                                       | 0       | 0       | 0       | 0 Histone H1.5 OS=Mus musculus GN=Hist1h1b PE=1 SV=2                                                                   |
| E9PXK8     | 1.073E-02      | 11.87                               | 24.22   | 13.1    | 14.76   | 0                                       | 0       | 0       | 0       | 0 Ubiquitin carboxyl-terminal hydrolase 7 OS=Mus musculus GN=Usp7 PE=1 SV=1                                            |
| F8VPX1     | 1.073E-02      | 11.87                               | 24.22   | 13.1    | 14.76   | 0                                       | 0       | 0       | 0       | 0 Ubiquitin carboxyl-terminal hydrolase 7 OS=Mus musculus GN=Usp7 PE=1 SV=1                                            |
| Q6A4J8     | 1.073E-02      | 11.87                               | 24.22   | 13.1    | 14.76   | 0                                       | 0       | 0       | 0       | 0 Ubiquitin carboxyl-terminal hydrolase 7 OS=Mus musculus GN=Usp7 PE=1 SV=1                                            |
| Q3TWF6     | 1.082E-02      | 10.29                               | 15.8    | 14.04   | 23.62   | 0                                       | 0       | 0       | 0       | 0 WD repeat-containing protein 70 OS=Mus musculus GN=Wdr70 PE=1 SV=1                                                   |
| Q6ZWQ0     | 1.263E-02      | 4.749                               | 7.371   | 7.487   | 11.81   | 0                                       | 0       | 0       | 0       | 0 Nesprin-2 OS=Mus musculus GN=Synce2 PE=1 SV=2                                                                        |
| E9QP46     | 1.263E-02      | 4.749                               | 7.371   | 7.487   | 11.81   | 0                                       | 0       | 0       | 0       | 0 Nesprin-2 OS=Mus musculus GN=Synce2 PE=1 SV=1                                                                        |
| Q9CXF4     | 1.809E-02      | 8.706                               | 8.424   | 2.808   | 5.904   | 0                                       | 0       | 0       | 0       | 0 TBC1 domain family member 15 OS=Mus musculus GN=Tbc1d15 PE=1 SV=1                                                    |
| O88796     | 1.816E-02      | 3.957                               | 4.212   | 4.679   | 8.857   | 0                                       | 0       | 0       | 0       | 0 Ribonuclease P protein subunit p30 OS=Mus musculus GN=Rpp30 PE=1 SV=1                                                |
| Q923B1     | 1.877E-02      | 5.54                                | 10.53   | 3.743   | 8.857   | 0                                       | 0       | 0       | 0       | 0 Lariat debranching enzyme OS=Mus musculus GN=Dbr1 PE=1 SV=2                                                          |
| Q8C7V3     | 2.118E-02      | 3.166                               | 4.212   | 1.872   | 5.904   | 0                                       | 0       | 0       | 0       | 0 U3 small nucleolar RNA-associated protein 15 homolog OS=Mus musculus GN=Utp15 PE=1 SV=1                              |
| Q6PAR5     | 2.130E-02      | 6.332                               | 9.477   | 3.743   | 11.81   | 0                                       | 0       | 0       | 0       | 0 GTPase-activating protein and VPS9 domain-containing protein 1 OS=Mus musculus GN=Gapd1 PE=1 SV=2                    |
| Q8JZK9     | 2.253E-02      | 18.99                               | 14.74   | 22.46   | 5.904   | 0                                       | 0       | 0       | 0       | 0 Hydroxymethylglutaryl-CoA synthase, cytoplasmic OS=Mus musculus GN=Hmgcs1 PE=1 SV=1                                  |
| A6PWY4     | 2.359E-02      | 9.497                               | 11.58   | 17.78   | 26.57   | 0                                       | 0       | 0       | 0       | 0 WD repeat-containing protein 76 OS=Mus musculus GN=Wdr76 PE=1 SV=1                                                   |
| P10404     | 2.363E-02      | 15.83                               | 9.477   | 12.17   | 26.57   | 0                                       | 0       | 0       | 0       | 0 MLV-related proviral Env polyprotein OS=Mus musculus GN=Vif PE=1 SV=3                                                |
| Q549C9     | 2.386E-02      | 19.79                               | 25.27   | 18.72   | 5.904   | 0                                       | 0       | 0       | 0       | 0 Cellular tumor antigen p53 OS=Mus musculus GN=Trp53 PE=1 SV=1                                                        |
| P02340     | 2.386E-02      | 19.79                               | 25.27   | 18.72   | 5.904   | 0                                       | 0       | 0       | 0       | 0 Cellular tumor antigen p53 OS=Mus musculus GN=Trp53 PE=1 SV=3                                                        |
| Q80ZA1     | 2.386E-02      | 19.79                               | 25.27   | 18.72   | 5.904   | 0                                       | 0       | 0       | 0       | 0 Cellular tumor antigen p53 OS=Mus musculus GN=Trp53 PE=1 SV=1                                                        |
| I7HIK9     | 2.386E-02      | 19.79                               | 25.27   | 18.72   | 5.904   | 0                                       | 0       | 0       | 0       | 0 Cellular tumor antigen p53 OS=Mus musculus GN=Trp53 PE=1 SV=1                                                        |
| Q9DIM4     | 2.388E-02      | 7.123                               | 7.371   | 5.615   | 14.76   | 0                                       | 0       | 0       | 0       | 0 Eukaryotic translation elongation factor 1 epsilon-1 OS=Mus musculus GN=Eef1e1 PE=1 SV=1                             |
| Q91W50     | 2.427E-02      | 5.54                                | 4.212   | 6.551   | 11.81   | 0                                       | 0       | 0       | 0       | 0 Cold shock domain-containing protein E1 OS=Mus musculus GN=Csd1 PE=1 SV=1                                            |
| Q3TY56     | 2.835E-02      | 3.957                               | 5.265   | 2.808   | 8.857   | 0                                       | 0       | 0       | 0       | 0 Eukaryotic translation initiation factor 3 subunit K OS=Mus musculus GN=Elf3k PE=1 SV=1                              |
| Q4VA53     | 3.395E-02      | 14.25                               | 4.212   | 13.1    | 5.904   | 0                                       | 0       | 0       | 0       | 0 Sister chromatid cohesion protein PDSS homolog B OS=Mus musculus GN=Pds5b PE=1 SV=1                                  |
| F8WHU5     | 3.395E-02      | 14.25                               | 4.212   | 13.1    | 5.904   | 0                                       | 0       | 0       | 0       | 0 Sister chromatid cohesion protein PDSS homolog B OS=Mus musculus GN=Pds5b PE=1 SV=1                                  |
| Q99JX4     | 3.480E-02      | 5.54                                | 9.477   | 1.872   | 8.857   | 0                                       | 0       | 0       | 0       | 0 Eukaryotic translation initiation factor 3 subunit M OS=Mus musculus GN=Elf3m PE=1 SV=1                              |
| O35130     | 4.039E-02      | 2.374                               | 3.159   | 6.551   | 8.857   | 0                                       | 0       | 0       | 0       | 0 Ribosomal RNA small subunit methyltransferase NEP1 OS=Mus musculus GN=Emg1 PE=1 SV=1                                 |
| P70336     | 5.833E-02      | 7.123                               | 7.371   | 6.551   | 0       | 0                                       | 0       | 0       | 0       | 0 Rho-associated protein kinase 2 OS=Mus musculus GN=Rock2 PE=1 SV=1                                                   |
| Q9ERU9     | 5.843E-02      | 4.749                               | 4.212   | 4.679   | 0       | 0                                       | 0       | 0       | 0       | 0 E3 SUMO-protein ligase RanBP2 OS=Mus musculus GN=Ranbp2 PE=1 SV=2                                                    |
| F6SDD7     | 5.850E-02      | 3.166                               | 3.159   | 2.808   | 0       | 0                                       | 0       | 0       | 0       | 0 DNA topoisomerase (Fragment) OS=Mus musculus GN=Top3b PE=1 SV=1                                                      |
| O88792     | 5.850E-02      | 3.166                               | 3.159   | 2.808   | 0       | 0                                       | 0       | 0       | 0       | 0 Junctional adhesion molecule A OS=Mus musculus GN=F11r PE=1 SV=2                                                     |
| A2RTH5     | 5.850E-02      | 3.166                               | 3.159   | 2.808   | 0       | 0                                       | 0       | 0       | 0       | 0 Leucine carboxyl methyltransferase 1 OS=Mus musculus GN=Lcm1 PE=1 SV=1                                               |
| AOA0U1RNF2 | 5.850E-02      | 3.166                               | 3.159   | 2.808   | 0       | 0                                       | 0       | 0       | 0       | 0 Protein Lcm1 OS=Mus musculus GN=Lcm1 PE=1 SV=1                                                                       |
| Q6PAV2     | 5.900E-02      | 5.54                                | 5.265   | 4.679   | 0       | 0                                       | 0       | 0       | 0       | 0 Probable E3 ubiquitin-protein ligase HERC4 OS=Mus musculus GN=Her4 PE=1 SV=2                                         |
| P17563     | 5.910E-02      | 11.87                               | 13.69   | 14.04   | 0       | 0                                       | 0       | 0       | 0       | 0 Selenium-binding protein 1 OS=Mus musculus GN=Selenbp1 PE=1 SV=2                                                     |
| Q921D0     | 5.950E-02      | 3.166                               | 3.159   | 3.743   | 0       | 0                                       | 0       | 0       | 0       | 0 Annexin OS=Mus musculus GN=Anxa8 PE=1 SV=1                                                                           |
| Q9Z321     | 5.950E-02      | 3.166                               | 3.159   | 3.743   | 0       | 0                                       | 0       | 0       | 0       | 0 DNA topoisomerase 3-beta-1 OS=Mus musculus GN=Top3b PE=1 SV=1                                                        |

Table S4. Shown here are 145 protein fractions expressed exclusively in isolated EVs from KO (non-ciliated cells) after inducing the release of ciliary vesicle by fluid-shear flow.

| Accession  | T-test p-value | Spectral count for ciliated EV (WT) |         |         |         | Spectral count for non-ciliated EV (KO) |         |         |         | Description                                                                                               |
|------------|----------------|-------------------------------------|---------|---------|---------|-----------------------------------------|---------|---------|---------|-----------------------------------------------------------------------------------------------------------|
|            |                | Sample1                             | Sample2 | Sample3 | Sample4 | Sample1                                 | Sample2 | Sample3 | Sample4 |                                                                                                           |
| Q61490     | 1.944E-05      | 0                                   | 0       | 0       | 0       | 21.69                                   | 22.64   | 21.01   | 23.02   | CD166 antigen OS=Mus musculus GN=Alcam PE=1 SV=3                                                          |
| E9Q3Q6     | 1.944E-05      | 0                                   | 0       | 0       | 0       | 21.69                                   | 22.64   | 21.01   | 23.02   | CD166 antigen OS=Mus musculus GN=Alcam PE=1 SV=1                                                          |
| E9Q4G8     | 1.944E-05      | 0                                   | 0       | 0       | 0       | 21.69                                   | 22.64   | 21.01   | 23.02   | CD166 antigen OS=Mus musculus GN=Alcam PE=1 SV=1                                                          |
| Q5SUW3     | 7.117E-05      | 0                                   | 0       | 0       | 0       | 4.487                                   | 4.718   | 4.943   | 4.262   | Growth factor receptor-bound protein 10 OS=Mus musculus GN=Grb10 PE=1 SV=1                                |
| Q60760     | 7.117E-05      | 0                                   | 0       | 0       | 0       | 4.487                                   | 4.718   | 4.943   | 4.262   | Growth factor receptor-bound protein 10 OS=Mus musculus GN=Grb10 PE=1 SV=2                                |
| P26618     | 7.382E-05      | 0                                   | 0       | 0       | 0       | 9.721                                   | 9.435   | 8.65    | 8.524   | Platelet-derived growth factor receptor alpha OS=Mus musculus GN=Pdgfra PE=1 SV=3                         |
| O35295     | 9.888E-05      | 0                                   | 0       | 0       | 0       | 5.234                                   | 5.661   | 6.178   | 5.967   | Transcriptional activator protein Pur-beta OS=Mus musculus GN=Purb PE=1 SV=3                              |
| O35474     | 1.057E-04      | 0                                   | 0       | 0       | 0       | 11.22                                   | 10.38   | 12.36   | 11.08   | EGF-like repeat and discoidin 1-like domain-containing protein 3 OS=Mus musculus GN=Edil3 PE=1 SV=2       |
| Q8C4U8     | 1.057E-04      | 0                                   | 0       | 0       | 0       | 11.22                                   | 10.38   | 12.36   | 11.08   | EGF-like repeat and discoidin 1-like domain-containing protein 3 OS=Mus musculus GN=Edil3 PE=1 SV=1       |
| Q80YX1     | 1.250E-04      | 0                                   | 0       | 0       | 0       | 53.09                                   | 58.5    | 60.55   | 63.93   | Tenascin OS=Mus musculus GN=Tnc PE=1 SV=1                                                                 |
| Q04857     | 2.077E-04      | 0                                   | 0       | 0       | 0       | 17.2                                    | 17.93   | 17.3    | 14.49   | Collagen alpha-1(VI) chain OS=Mus musculus GN=Col6a1 PE=1 SV=1                                            |
| Q6P1J1     | 2.575E-04      | 0                                   | 0       | 0       | 0       | 14.21                                   | 16.98   | 14.83   | 13.64   | Crmpl protein OS=Mus musculus GN=Crmpl PE=1 SV=1                                                          |
| P51655     | 3.923E-04      | 0                                   | 0       | 0       | 0       | 26.17                                   | 20.76   | 24.71   | 21.31   | Glypican-4 OS=Mus musculus GN=Gpc4 PE=1 SV=2                                                              |
| D3Z1J5     | 5.086E-04      | 0                                   | 0       | 0       | 0       | 2.991                                   | 2.831   | 3.707   | 3.41    | Palladin (Fragment) OS=Mus musculus GN=Palld PE=1 SV=1                                                    |
| P62897     | 5.461E-04      | 0                                   | 0       | 0       | 0       | 12.71                                   | 12.27   | 9.885   | 10.23   | Cytochrome c, somatic OS=Mus musculus GN=Cycc PE=1 SV=2                                                   |
| P28653     | 5.741E-04      | 0                                   | 0       | 0       | 0       | 26.17                                   | 19.81   | 23.48   | 26.43   | Biglycan OS=Mus musculus GN=Bgn PE=1 SV=1                                                                 |
| Q9WTK5     | 6.379E-04      | 0                                   | 0       | 0       | 0       | 2.991                                   | 2.831   | 2.471   | 3.41    | Nuclear factor NF-kappa-B p100 subunit OS=Mus musculus GN=Nfkb2 PE=1 SV=1                                 |
| Q62009     | 6.444E-04      | 0                                   | 0       | 0       | 0       | 27.67                                   | 22.64   | 21.01   | 21.31   | Periostin OS=Mus musculus GN=Postn PE=1 SV=2                                                              |
| P97927     | 6.548E-04      | 0                                   | 0       | 0       | 0       | 25.42                                   | 27.36   | 21.01   | 28.98   | Laminin subunit alpha-4 OS=Mus musculus GN=Lama4 PE=1 SV=2                                                |
| E9QA16     | 7.499E-04      | 0                                   | 0       | 0       | 0       | 21.69                                   | 22.64   | 27.19   | 19.61   | Protein Cald1 OS=Mus musculus GN=Cald1 PE=1 SV=1                                                          |
| Q8VCQ8     | 8.082E-04      | 0                                   | 0       | 0       | 0       | 21.69                                   | 21.7    | 27.19   | 19.61   | Caldesmon 1 OS=Mus musculus GN=Cald1 PE=1 SV=1                                                            |
| AOA0G2IGD2 | 8.449E-04      | 0                                   | 0       | 0       | 0       | 3.739                                   | 4.718   | 3.707   | 3.41    | Protein S100-A4 (Fragment) OS=Mus musculus GN=S100a4 PE=1 SV=1                                            |
| P07091     | 8.449E-04      | 0                                   | 0       | 0       | 0       | 3.739                                   | 4.718   | 3.707   | 3.41    | Protein S100-A4 OS=Mus musculus GN=S100a4 PE=1 SV=1                                                       |
| P37889     | 9.486E-04      | 0                                   | 0       | 0       | 0       | 64.31                                   | 57.55   | 44.48   | 52.85   | Fibulin-2 OS=Mus musculus GN=Fbln2 PE=1 SV=2                                                              |
| AOA0J9YUE9 | 1.172E-03      | 0                                   | 0       | 0       | 0       | 7.478                                   | 5.661   | 7.414   | 8.524   | Dynamin-1 OS=Mus musculus GN=Dnm1 PE=1 SV=1                                                               |
| P54728     | 1.177E-03      | 0                                   | 0       | 0       | 0       | 5.982                                   | 6.605   | 8.65    | 6.819   | UV excision repair protein RAD23 homolog B OS=Mus musculus GN=Rad23b PE=1 SV=2                            |
| G3XA35     | 1.387E-03      | 0                                   | 0       | 0       | 0       | 8.973                                   | 8.492   | 7.414   | 5.967   | MCG116562, isoform CRA_a OS=Mus musculus GN=Vcan PE=1 SV=1                                                |
| E9PYH0     | 1.387E-03      | 0                                   | 0       | 0       | 0       | 8.973                                   | 8.492   | 7.414   | 5.967   | Versican core protein OS=Mus musculus GN=Vcan PE=1 SV=1                                                   |
| P10518     | 1.406E-03      | 0                                   | 0       | 0       | 0       | 5.982                                   | 8.492   | 8.65    | 6.819   | Delta-aminolevulinic acid dehydratase OS=Mus musculus GN=Alad PE=1 SV=1                                   |
| Q6P069     | 1.430E-03      | 0                                   | 0       | 0       | 0       | 8.973                                   | 10.38   | 9.885   | 6.819   | Sorcin OS=Mus musculus GN=Sri PE=1 SV=1                                                                   |
| P18872     | 1.481E-03      | 0                                   | 0       | 0       | 0       | 19.44                                   | 20.76   | 16.06   | 24.72   | Guanine nucleotide-binding protein G(o) subunit alpha OS=Mus musculus GN=Gnao1 PE=1 SV=3                  |
| Q8CG14     | 1.604E-03      | 0                                   | 0       | 0       | 0       | 8.973                                   | 11.32   | 7.414   | 8.524   | Complement C1s-a subcomponent OS=Mus musculus GN=C1sa PE=2 SV=2                                           |
| E9Q6C2     | 1.604E-03      | 0                                   | 0       | 0       | 0       | 8.973                                   | 11.32   | 7.414   | 8.524   | Protein C1s1 OS=Mus musculus GN=C1s1 PE=1 SV=1                                                            |
| D3Z2M7     | 1.615E-03      | 0                                   | 0       | 0       | 0       | 19.44                                   | 17.93   | 13.59   | 21.31   | Guanine nucleotide-binding protein G(o) subunit alpha (Fragment) OS=Mus musculus GN=Gnao1 PE=1 SV=1       |
| O88322     | 1.713E-03      | 0                                   | 0       | 0       | 0       | 68.79                                   | 62.27   | 43.25   | 60.52   | Nidogen-2 OS=Mus musculus GN=Nid2 PE=1 SV=2                                                               |
| Q70326     | 1.788E-03      | 0                                   | 0       | 0       | 0       | 3.739                                   | 2.831   | 3.707   | 2.557   | Grem1 OS=Mus musculus GN=Grem1 PE=2 SV=1                                                                  |
| Q62523     | 2.085E-03      | 0                                   | 0       | 0       | 0       | 4.487                                   | 4.718   | 3.707   | 5.967   | Zyxin OS=Mus musculus GN=Zyx PE=1 SV=2                                                                    |
| Q7TQE2     | 2.085E-03      | 0                                   | 0       | 0       | 0       | 4.487                                   | 4.718   | 3.707   | 5.967   | Zyx protein OS=Mus musculus GN=Zyx PE=1 SV=1                                                              |
| Q01149     | 2.120E-03      | 0                                   | 0       | 0       | 0       | 31.41                                   | 36.8    | 30.89   | 22.16   | Collagen alpha-2(I) chain OS=Mus musculus GN=Col1a2 PE=1 SV=2                                             |
| H3BL26     | 2.249E-03      | 0                                   | 0       | 0       | 0       | 4.487                                   | 4.718   | 4.943   | 6.819   | Tetraspanin-6 (Fragment) OS=Mus musculus GN=Tspan6 PE=1 SV=8                                              |
| O70401     | 2.249E-03      | 0                                   | 0       | 0       | 0       | 4.487                                   | 4.718   | 4.943   | 6.819   | Tetraspanin-6 OS=Mus musculus GN=Tspan6 PE=1 SV=1                                                         |
| Q99196     | 2.249E-03      | 0                                   | 0       | 0       | 0       | 4.487                                   | 4.718   | 4.943   | 6.819   | Tetraspanin OS=Mus musculus GN=Tspan6 PE=1 SV=1                                                           |
| P28654     | 2.368E-03      | 0                                   | 0       | 0       | 0       | 57.58                                   | 95.29   | 88.97   | 77.57   | Decorin OS=Mus musculus GN=Dcn PE=1 SV=1                                                                  |
| Q62000     | 2.405E-03      | 0                                   | 0       | 0       | 0       | 10.47                                   | 8.492   | 6.178   | 8.524   | Mimcan OS=Mus musculus GN=Ogn PE=1 SV=1                                                                   |
| G61553     | 2.754E-03      | 0                                   | 0       | 0       | 0       | 63.56                                   | 101     | 110     | 94.62   | Fascin OS=Mus musculus GN=Fscn1 PE=1 SV=4                                                                 |
| G3UXG7     | 2.887E-03      | 0                                   | 0       | 0       | 0       | 3.739                                   | 4.718   | 6.178   | 4.262   | Casein kinase II subunit beta OS=Mus musculus GN=Csk2b PE=1 SV=1                                          |
| P67871     | 2.887E-03      | 0                                   | 0       | 0       | 0       | 3.739                                   | 4.718   | 6.178   | 4.262   | Casein kinase II subunit beta OS=Mus musculus GN=Csk2b PE=1 SV=1                                          |
| D3Z4A4     | 3.269E-03      | 0                                   | 0       | 0       | 0       | 20.19                                   | 16.98   | 11.12   | 17.05   | Peroxiredoxin-2 (Fragment) OS=Mus musculus GN=Prdx2 PE=1 SV=8                                             |
| D3YX76     | 3.340E-03      | 0                                   | 0       | 0       | 0       | 2.991                                   | 4.718   | 3.707   | 5.115   | Glutathione S-transferase OS=Mus musculus GN=Gstm2 PE=1 SV=1                                              |
| P15626     | 3.340E-03      | 0                                   | 0       | 0       | 0       | 2.991                                   | 4.718   | 3.707   | 5.115   | Glutathione S-transferase Mu 2 OS=Mus musculus GN=Gstm2 PE=1 SV=2                                         |
| P16125     | 3.458E-03      | 0                                   | 0       | 0       | 0       | 8.225                                   | 12.27   | 14.83   | 11.08   | L-lactate dehydrogenase B chain OS=Mus musculus GN=Ldhb PE=1 SV=2                                         |
| AOA087WS16 | 3.504E-03      | 0                                   | 0       | 0       | 0       | 18.69                                   | 16.98   | 11.12   | 12.79   | Protein Colfa3 OS=Mus musculus GN=Colfa3 PE=1 SV=1                                                        |
| Q9DCC4     | 3.573E-03      | 0                                   | 0       | 0       | 0       | 3.739                                   | 2.831   | 4.943   | 3.41    | Pyroline-5-carboxylate reductase 3 OS=Mus musculus GN=Pycrl PE=1 SV=2                                     |
| Q5SS83     | 3.605E-03      | 0                                   | 0       | 0       | 0       | 5.982                                   | 3.774   | 6.178   | 4.262   | Flotillin 2, isoform CRA_a OS=Mus musculus GN=Flot2 PE=1 SV=1                                             |
| Q60634     | 3.605E-03      | 0                                   | 0       | 0       | 0       | 5.982                                   | 3.774   | 6.178   | 4.262   | Flotillin-2 OS=Mus musculus GN=Flot2 PE=1 SV=2                                                            |
| AOA067XG53 | 3.769E-03      | 0                                   | 0       | 0       | 0       | 5.982                                   | 7.548   | 7.414   | 4.262   | Peripheral plasma membrane protein CASK (Fragment) OS=Mus musculus GN=Cask PE=1 SV=1                      |
| O70589     | 3.769E-03      | 0                                   | 0       | 0       | 0       | 5.982                                   | 7.548   | 7.414   | 4.262   | Peripheral plasma membrane protein CASK OS=Mus musculus GN=Cask PE=1 SV=2                                 |
| P11152     | 4.018E-03      | 0                                   | 0       | 0       | 0       | 14.21                                   | 7.548   | 12.36   | 11.08   | Liponprotein lipase OS=Mus musculus GN=Lpl PE=1 SV=3                                                      |
| B1B1E2     | 4.292E-03      | 0                                   | 0       | 0       | 0       | 2.991                                   | 5.661   | 4.943   | 4.262   | Latent-transforming growth factor beta-binding protein 1 (Fragment) OS=Mus musculus GN=Ltbp1 PE=1 SV=8    |
| Q8CG19     | 4.292E-03      | 0                                   | 0       | 0       | 0       | 2.991                                   | 5.661   | 4.943   | 4.262   | Latent-transforming growth factor beta-binding protein 1 OS=Mus musculus GN=Ltbp1 PE=1 SV=1               |
| Q9ET54     | 4.376E-03      | 0                                   | 0       | 0       | 0       | 4.487                                   | 7.548   | 8.65    | 6.819   | Palladin OS=Mus musculus GN=Palld PE=1 SV=2                                                               |
| P48428     | 4.525E-03      | 0                                   | 0       | 0       | 0       | 8.225                                   | 4.718   | 6.178   | 5.115   | Tubulin-specific chaperone A OS=Mus musculus GN=Tbca PE=1 SV=3                                            |
| E9Q2A0     | 4.610E-03      | 0                                   | 0       | 0       | 0       | 5.982                                   | 6.605   | 6.178   | 3.41    | EGF-containing fibulin-like extracellular matrix protein 2 (Fragment) OS=Mus musculus GN=Efemp2 PE=1 SV=1 |
| Q99K41     | 5.109E-03      | 0                                   | 0       | 0       | 0       | 19.44                                   | 30.19   | 18.54   | 17.9    | EMILIN-1 OS=Mus musculus GN=Emilin1 PE=1 SV=1                                                             |
| E9PWQ3     | 5.149E-03      | 0                                   | 0       | 0       | 0       | 21.69                                   | 20.76   | 13.59   | 12.79   | Protein Colfa3 OS=Mus musculus GN=Colfa3 PE=1 SV=2                                                        |
| O70433     | 5.362E-03      | 0                                   | 0       | 0       | 0       | 3.739                                   | 6.605   | 6.178   | 7.672   | Four and a half LIM domains protein 2 OS=Mus musculus GN=Flh2 PE=1 SV=1                                   |
| E9PYB0     | 5.638E-03      | 0                                   | 0       | 0       | 0       | 5.234                                   | 3.774   | 7.414   | 5.115   | Protein Ahnak2 (Fragment) OS=Mus musculus GN=Ahnk2 PE=1 SV=8                                              |
| Q9WVJ9     | 5.877E-03      | 0                                   | 0       | 0       | 0       | 8.973                                   | 9.435   | 6.178   | 5.115   | EGF-containing fibulin-like extracellular matrix protein 2 OS=Mus musculus GN=Efemp2 PE=1 SV=1            |
| G5ERD6     | 5.877E-03      | 0                                   | 0       | 0       | 0       | 8.973                                   | 9.435   | 6.178   | 5.115   | EGF-containing fibulin-like extracellular matrix protein 2 OS=Mus musculus GN=Efemp2 PE=1 SV=1            |
| P10493     | 5.997E-03      | 0                                   | 0       | 0       | 0       | 94.22                                   | 82.08   | 44.48   | 75.87   | Nidogen-1 OS=Mus musculus GN=Nid1 PE=1 SV=2                                                               |
| Q9JJU8     | 6.089E-03      | 0                                   | 0       | 0       | 0       | 5.982                                   | 7.548   | 11.12   | 6.819   | SH3 domain-binding glutamic acid-rich-like protein OS=Mus musculus GN=Sh3bgl PE=1 SV=1                    |
| Q62059     | 6.316E-03      | 0                                   | 0       | 0       | 0       | 8.225                                   | 8.492   | 6.178   | 2.557   | Versican core protein OS=Mus musculus GN=Vcan PE=1 SV=2                                                   |
| Q61081     | 6.334E-03      | 0                                   | 0       | 0       | 0       | 3.739                                   | 1.887   | 2.471   | 2.557   | Hsp90 co-chaperone Cdc37 OS=Mus musculus GN=Cdc37 PE=1 SV=1                                               |
| O08603     | 6.607E-03      | 0                                   | 0       | 0       | 0       | 5.982                                   | 6.605   | 7.414   | 3.41    | Retinoic acid early-inducible protein 1-beta OS=Mus musculus GN=Rael1b PE=1 SV=1                          |
| P53996     | 6.828E-03      | 0                                   | 0       | 0       | 0       | 16.45                                   | 12.27   | 14.83   | 7.672   | Cellular nucleic acid-binding protein OS=Mus musculus GN=Cnbp PE=1 SV=2                                   |
| Q60866     | 6.964E-03      | 0                                   | 0       | 0       | 0       | 2.243                                   | 3.774   | 4.943   | 4.262   | Phosphotriesterase-related protein OS=Mus musculus GN=Pter PE=1 SV=1                                      |
| A2AUR3     | 6.964E-03      | 0                                   | 0       | 0       | 0       | 2.243                                   | 3.774   | 4.943   | 4.262   | Phosphotriesterase-related protein (Fragment) OS=Mus musculus GN=Pter PE=1 SV=2                           |
| P35441     | 7.000E-03      | 0                                   | 0       | 0       | 0       | 2.991                                   | 6.605   | 4.943   | 5.115   | Thrombospondin-1 OS=Mus musculus GN=Thbs1 PE=1 SV=1                                                       |
| Q80YQ1     | 7.000E-03      | 0                                   | 0       | 0       | 0       | 2.991                                   | 6.605   | 4.943   | 5.115   | Thrombospondin 1 OS=Mus musculus GN=Thbs1 PE=1 SV=1                                                       |
| D3YTP0     | 7.130E-03      | 0                                   | 0       | 0       | 0       | 3.739                                   | 6.605   | 4.943   | 7.672   | Metalloendopeptidase STEAP3 (Fragment) OS=Mus musculus GN=Steap3 PE=1 SV=8                                |
| E9QN92     | 7.130E-03      | 0                                   | 0       | 0       | 0       | 3.739                                   | 6.605   | 4.943   | 7.672   | Metalloendopeptidase STEAP3 OS=Mus musculus GN=Steap3 PE=1 SV=1                                           |
| Q8CI59     | 7.130E-03      | 0                                   | 0       | 0       | 0       | 3.739                                   | 6.605   | 4.943   | 7.672   | Metalloendopeptidase STEAP3 OS=Mus musculus GN=Steap3 PE=1 SV=1                                           |
| AOA0R4J1G9 | 7.130E-03      | 0                                   | 0       | 0       | 0       | 3.739                                   | 6.605   | 4.943   | 7.672   | Metalloendopeptidase STEAP3 OS=Mus musculus GN=Steap3 PE=1 SV=1                                           |
| Q9CWS0     | 7.276E-03      | 0                                   | 0       | 0       | 0       | 3.739                                   | 2.831   | 4.943   | 2.557   | N(G),N(G)-dimethylarginine dimethylaminohydrolase 1 OS=Mus musculus GN=Ndahl1 PE=1 SV=3                   |
| Q64314     | 7.326E-03      | 0                                   | 0       | 0       | 0       | 5.982                                   | 9.435   | 6.178   | 11.08   | Hematopoietic progenitor cell antigen CD34 OS=Mus musculus GN=CD34 PE=1 SV=1                              |
| P01027     | 7.522E-03      | 0                                   | 0       | 0       | 0       | 8.973                                   | 16.06   | 13.59   | 8.524   | Complement C3 OS=Mus musculus GN=C3 PE=1 SV=3                                                             |
| Q3U687     | 7.621E-03      | 0                                   | 0       | 0       | 0       | 3.739                                   | 7.548   | 7.414   | 5.115   | Protein Ifit1b2 OS=Mus musculus GN=Ifit1b2 PE=1 SV=1                                                      |
| P70290     | 9.163E-03      | 0                                   | 0       | 0       | 0       | 9.721                                   | 16.98   | 8.65    | 10.23   | 55 kDa erythrocyte membrane protein OS=Mus musculus GN=Mpp1 PE=1 SV=1                                     |
| A2AN84     | 9.163E-03      | 0                                   | 0       | 0       | 0       | 9.721                                   | 16.98   | 8.65    | 10.23   | 55 kDa erythrocyte membrane protein OS=Mus musculus GN=Mpp1 PE=1 SV=1                                     |
| Q03350     | 9.228E-03      | 0                                   | 0       | 0       | 0       | 10.47                                   | 11.32   | 7.414   | 5.115   | Thrombospondin-2 OS=Mus musculus GN=Thbs2 PE=1 SV=2                                                       |
| Q64449     | 9.564E-03      | 0                                   | 0       | 0       | 0       | 5.234                                   | 8.492   | 6.178   | 11.08   | C-type mannose receptor 2 OS=Mus musculus GN=Mrc2 PE=1 SV=3                                               |
| P14428     | 9.610E-03      | 0                                   | 0       | 0       | 0       | 4.487                                   | 4.718   | 4.943   | 8.524   | H-2 class I histocompatibility antigen, K-Q alpha chain (Fragment) OS=Mus musculus GN=H2-K1 PE=1 SV=1     |
| G3UXU2     | 1.059E-02      | 0                                   | 0       | 0       | 0       | 2.243                                   | 2.831   | 4.943   | 4.262   | Casein kinase II subunit beta (Fragment) OS=Mus musculus GN=Csk2b PE=1 SV=2                               |
| P61622     | 1.059E-02      | 0                                   | 0       | 0       | 0       | 2.243                                   | 2.831   | 4.943   | 4.262   | Integrin alpha-11 OS=Mus musculus GN=Itga11 PE=1 SV=1                                                     |
| AOA0B4J1F0 | 1.059E-02      | 0                                   | 0       | 0       | 0       | 2.243                                   | 2.831   | 4.943   | 4.262   | Integrin alpha-11 OS=Mus musculus GN=Itga11 PE=1 SV=1                                                     |
| Q8K2A1     | 1.061E-02      | 0                                   | 0       | 0       | 0       | 4.487                                   | 3.774   | 3.707   | 7.105   | PTB domain-containing engulfment adapter protein 1 OS=Mus musculus GN=Gulp1 PE=1 SV=1                     |
| E0CXCS     | 1.061E-02      | 0                                   | 0       | 0       | 0       | 4.487                                   | 3.774   | 3.707   | 7.105   | PTB domain-containing engulfment adapter protein 1 OS=Mus musculus GN=Gulp1 PE=1 SV=1                     |
| O35646     | 1.094E-02      | 0                                   | 0       | 0       | 0       | 2.243                                   | 4.718   | 4.943   | 5.967   | Calpain-6 OS=Mus musculus GN=Capn6 PE=1 SV=2                                                              |
| Q9D0F9     | 1.123E-02      | 0                                   | 0       | 0       | 0       | 5.982                                   | 5.661   | 6.178   | 11.08   | Phosphoglucomutase-1 OS=Mus musculus GN=Pgm1 PE=1 SV=4                                                    |
| E9QN12     | 1.150E-02      | 0                                   | 0       | 0       |         |                                         |         |         |         |                                                                                                           |

|           |           |   |   |   |       |       |       |       |                                                                                                                                                   |
|-----------|-----------|---|---|---|-------|-------|-------|-------|---------------------------------------------------------------------------------------------------------------------------------------------------|
| Q8BH35    | 2.428E-02 | 0 | 0 | 0 | 2.991 | 4.718 | 8.65  | 4.262 | Complement component C8 beta chain OS=Mus musculus GN=C8b PE=1 SV=1                                                                               |
| D9JZ29    | 2.601E-02 | 0 | 0 | 0 | 9.721 | 5.661 | 2.471 | 6.819 | ENH isoform 1b OS=Mus musculus GN=Pdlim5 PE=1 SV=1                                                                                                |
| Q8C151    | 2.601E-02 | 0 | 0 | 0 | 9.721 | 5.661 | 2.471 | 6.819 | PDZ and LIM domain protein 5 OS=Mus musculus GN=Pdlim5 PE=1 SV=4                                                                                  |
| D9J301    | 2.601E-02 | 0 | 0 | 0 | 9.721 | 5.661 | 2.471 | 6.819 | ENH isoform 1d OS=Mus musculus GN=Pdlim5 PE=1 SV=1                                                                                                |
| D9J300    | 2.601E-02 | 0 | 0 | 0 | 9.721 | 5.661 | 2.471 | 6.819 | ENH isoform 1c OS=Mus musculus GN=Pdlim5 PE=1 SV=1                                                                                                |
| D9J302    | 2.601E-02 | 0 | 0 | 0 | 9.721 | 5.661 | 2.471 | 6.819 | ENH isoform 1e OS=Mus musculus GN=Pdlim5 PE=1 SV=1                                                                                                |
| E9Q1S3    | 2.605E-02 | 0 | 0 | 0 | 3.739 | 11.32 | 4.943 | 7.672 | Protein transport protein Sec23a OS=Mus musculus GN=Sec23a PE=1 SV=1                                                                              |
| Q01405    | 2.605E-02 | 0 | 0 | 0 | 3.739 | 11.32 | 4.943 | 7.672 | Protein transport protein Sec23A OS=Mus musculus GN=Sec23a PE=1 SV=2                                                                              |
| P01942    | 2.880E-02 | 0 | 0 | 0 | 2.243 | 7.548 | 4.943 | 3.41  | Hemoglobin subunit alpha OS=Mus musculus GN=Hba PE=1 SV=2                                                                                         |
| Q91V8     | 2.880E-02 | 0 | 0 | 0 | 2.243 | 7.548 | 4.943 | 3.41  | Alpha globin 1 OS=Mus musculus GN=haemoglobin alpha 2 PE=1 SV=1                                                                                   |
| Q61205    | 3.254E-02 | 0 | 0 | 0 | 1.496 | 6.605 | 4.943 | 3.41  | Platelet-activating factor acetylhydrolase 1B subunit gamma OS=Mus musculus GN=Pafah1b3 PE=1 SV=1                                                 |
| D3Z7E6    | 3.254E-02 | 0 | 0 | 0 | 1.496 | 6.605 | 4.943 | 3.41  | Platelet-activating factor acetylhydrolase 1B subunit gamma OS=Mus musculus GN=Pafah1b3 PE=1 SV=1                                                 |
| Q9CPN8    | 3.556E-02 | 0 | 0 | 0 | 9.721 | 13.21 | 3.707 | 5.115 | Insulin-like growth factor 2 mRNA-binding protein 3 OS=Mus musculus GN=Igf2bp3 PE=1 SV=1                                                          |
| A0A0G2EJ0 | 3.626E-02 | 0 | 0 | 0 | 8.973 | 3.774 | 2.471 | 5.115 | PDZ and LIM domain protein 5 (Fragment) OS=Mus musculus GN=Pdlim5 PE=1 SV=1                                                                       |
| P33434    | 3.657E-02 | 0 | 0 | 0 | 2.991 | 8.492 | 3.707 | 3.41  | 72 kDa type IV collagenase OS=Mus musculus GN=Mmp2 PE=1 SV=1                                                                                      |
| Q9CQ60    | 4.011E-02 | 0 | 0 | 0 | 10.47 | 8.492 | 2.471 | 4.262 | 6-phosphogluconolactonase OS=Mus musculus GN=Pgls PE=1 SV=1                                                                                       |
| O08604    | 5.817E-02 | 0 | 0 | 0 | 5.234 | 4.718 | 4.943 | 0     | Retinoic acid early-inducible protein 1-gamma OS=Mus musculus GN=Rae1c PE=1 SV=1                                                                  |
| Q91V35    | 5.849E-02 | 0 | 0 | 0 | 2.243 | 0     | 2.471 | 2.557 | Receptor-type tyrosine-protein phosphatase OS=Mus musculus GN=Ptpn11 PE=1 SV=1                                                                    |
| O08608    | 5.880E-02 | 0 | 0 | 0 | 2.991 | 2.831 | 0     | 2.557 | Sorting nexin-5 OS=Mus musculus GN=Snx5 PE=1 SV=1                                                                                                 |
| Q3TT92    | 5.892E-02 | 0 | 0 | 0 | 29.16 | 27.36 | 0     | 24.72 | Dihydropyrimidinase-related protein 3 OS=Mus musculus GN=Dpysl3 PE=1 SV=1                                                                         |
| Q60716    | 5.937E-02 | 0 | 0 | 0 | 2.991 | 2.831 | 2.471 | 0     | Prolyl 4-hydroxylase subunit alpha-2 OS=Mus musculus GN=P4ha2 PE=1 SV=1                                                                           |
| Q5SX75    | 5.937E-02 | 0 | 0 | 0 | 2.991 | 2.831 | 2.471 | 0     | Procollagen-proline, 2-oxoglutarate 4-dioxygenase (Proline 4-hydroxylase), alpha II polypeptide, isoform CRA_f OS=Mus musculus GN=P4ha2 PE=1 SV=1 |
| Q61391    | 5.940E-02 | 0 | 0 | 0 | 2.991 | 2.831 | 0     | 3.41  | Nephrilysin OS=Mus musculus GN=Mme PE=1 SV=3                                                                                                      |
| F6X8L5    | 5.961E-02 | 0 | 0 | 0 | 5.234 | 4.718 | 0     | 4.262 | 6-phosphogluconolactonase (Fragment) OS=Mus musculus GN=Pgls PE=1 SV=1                                                                            |

Table S5. Shown here are 524 proteins expressed in both elutriated WT and non-elutriated KO cell-derived vesicles.

| Accession  | T-test p-value | Spectral count for elutriated EV (WT) |         |         |         | Spectral count for non-elutriated (KO) |         |         |         | Description                                                                              |
|------------|----------------|---------------------------------------|---------|---------|---------|----------------------------------------|---------|---------|---------|------------------------------------------------------------------------------------------|
|            |                | Sample1                               | Sample2 | Sample3 | Sample4 | Sample1                                | Sample2 | Sample3 | Sample4 |                                                                                          |
| Q8VHX6     | 3.9976E-05     | 26.12                                 | 29.48   | 30.88   | 29.52   | 148.8                                  | 146.2   | 143.3   | 138.1   | Filamin-C OS=Mus musculus GN=Flnc PE=1 SV=3                                              |
| P08775     | 1.3897E-04     | 26.91                                 | 32.64   | 27.14   | 29.52   | 4.487                                  | 5.661   | 2.471   | 5.967   | DNA-directed RNA polymerase II subunit RPB1 OS=Mus musculus GN=Polr2a PE=1 SV=3          |
| A0A0R4J0V5 | 1.3897E-04     | 26.91                                 | 32.64   | 27.14   | 29.52   | 4.487                                  | 5.661   | 2.471   | 5.967   | DNA-directed RNA polymerase II subunit RPB1 OS=Mus musculus GN=Polr2a PE=1 SV=3          |
| D3YUQ9     | 1.6781E-04     | 15.83                                 | 0       | 4.679   | 0       | 8.973                                  | 6.605   | 11.12   | 7.672   | Elongation factor 1-delta (Fragment) OS=Mus musculus GN=Ef1d1 PE=1 SV=8                  |
| P13020     | 1.9109E-04     | 16.62                                 | 15.8    | 16.85   | 14.76   | 34.4                                   | 35.85   | 35.83   | 36.65   | Gelsolin OS=Mus musculus GN=Gsn PE=1 SV=3                                                |
| E9Q3W4     | 2.0309E-04     | 16.62                                 | 15.8    | 18.72   | 14.76   | 142.8                                  | 139.6   | 133.5   | 117.6   | Plectin OS=Mus musculus GN=Plec PE=1 SV=1                                                |
| Q9QX51     | 2.0278E-04     | 16.62                                 | 16.85   | 19.65   | 14.76   | 143.6                                  | 139.6   | 134.7   | 117.6   | Plectin OS=Mus musculus GN=Plec PE=1 SV=3                                                |
| E9Q119     | 2.5822E-04     | 57.72                                 | 52.91   | 52.41   | 50.19   | 17.95                                  | 17.95   | 17.93   | 18.75   | Exportin-2 OS=Mus musculus GN=Cxcl11 PE=1 SV=1                                           |
| E9PX23     | 2.8060E-04     | 6.332                                 | 4.212   | 3.743   | 5.904   | 2.243                                  | 0       | 0       | 2.557   | Metastasis-associated protein MTA1 OS=Mus musculus GN=Mta1 PE=1 SV=1                     |
| Q8K4B0     | 2.8060E-04     | 6.332                                 | 4.212   | 3.743   | 5.904   | 2.243                                  | 0       | 0       | 2.557   | Metastasis-associated protein MTA1 OS=Mus musculus GN=Mta1 PE=1 SV=1                     |
| FW8HY8     | 2.8060E-04     | 6.332                                 | 4.212   | 3.743   | 5.904   | 2.243                                  | 0       | 0       | 2.557   | Metastasis-associated protein MTA1 OS=Mus musculus GN=Mta1 PE=1 SV=1                     |
| Q9W9Y9     | 2.8565E-04     | 0                                     | 4.212   | 0       | 0       | 35.89                                  | 48.12   | 35.83   | 40.92   | Band 4.1-like protein 3 OS=Mus musculus GN=Ep4h13 PE=1 SV=1                              |
| Q62551     | 2.9072E-04     | 83.82                                 | 75.82   | 86.74   | 70.52   | 17.95                                  | 17.95   | 17.93   | 18.75   | Exportin-2 OS=Mus musculus GN=Cxcl11 PE=1 SV=1                                           |
| MQW0P1     | 3.0775E-04     | 34.82                                 | 33.7    | 41.18   | 14.76   | 73.28                                  | 67.93   | 81.36   | 58.82   | Agrin OS=Mus musculus GN=Agrn PE=1 SV=1                                                  |
| P23116     | 3.3446E-04     | 54.61                                 | 50.54   | 51.47   | 56.09   | 41.13                                  | 33.97   | 38.31   | 41.77   | Eukaryotic translation initiation factor 3 subunit A OS=Mus musculus GN=EIF3a PE=1 SV=5  |
| D3ZSN9     | 4.7146E-04     | 7.915                                 | 8.424   | 7.487   | 8.857   | 0                                      | 0       | 0       | 2.557   | MCG49198 OS=Mus musculus GN=Gm5449 PE=4 SV=1                                             |
| Q9ERK4     | 5.4543E-04     | 60.94                                 | 55.81   | 54.28   | 50.19   | 17.95                                  | 17.95   | 17.93   | 18.75   | Exportin-2 OS=Mus musculus GN=Cxcl11 PE=1 SV=1                                           |
| P42274     | 5.5510E-04     | 33.24                                 | 28.08   | 32.47   | 14.96   | 1.887                                  | 0       | 0       | 0       | Histone H1.3 OS=Mus musculus GN=H1h1 PE=1 SV=2                                           |
| A0A1D5RMD8 | 5.8640E-04     | 7.123                                 | 7.371   | 6.551   | 8.857   | 0                                      | 0       | 0       | 3.41    | CCR4-NOT transcription complex subunit 1 OS=Mus musculus GN=Cnot1 PE=1 SV=1              |
| Q8BFY9     | 6.3906E-04     | 25.33                                 | 23.17   | 22.46   | 32.47   | 7.478                                  | 6.605   | 7.414   | 11.93   | Transportin-1 OS=Mus musculus GN=Topo1 PE=1 SV=2                                         |
| E9EQH3     | 6.4096E-04     | 39.57                                 | 47.39   | 43.05   | 44.28   | 23.18                                  | 28.31   | 28.42   | 29.84   | Vacuolar protein sorting-associated protein 35 OS=Mus musculus GN=Vps35 PE=1 SV=1        |
| Q61656     | 6.9064E-04     | 41.16                                 | 38.96   | 42.11   | 32.47   | 9.721                                  | 8.492   | 6.178   | 6.819   | Probable ATP-dependent RNA helicase DDX53 OS=Mus musculus GN=Ddx53 PE=1 SV=2             |
| Q9Q909     | 7.1787E-04     | 10.29                                 | 11.58   | 11.23   | 14.76   | 2.991                                  | 3.74    | 4.983   | 5.967   | Methylosome protein 50 OS=Mus musculus GN=Wdr77 PE=1 SV=1                                |
| Q9DAM6     | 7.3271E-04     | 25.33                                 | 30.54   | 26.2    | 23.62   | 17.2                                   | 19.81   | 17.3    | 12.79   | 14U16 small nuclear ribonucleoprotein Pp4 OS=Mus musculus GN=Pp4 PE=1 SV=1               |
| JKMQ02     | 7.5028E-04     | 34.82                                 | 35.8    | 39.31   | 41.33   | 14.31                                  | 19.81   | 19.77   | 18.75   | Protein Gm5422 OS=Mus musculus GN=Gm5422 PE=4 SV=1                                       |
| P14824     | 7.8030E-04     | 97.35                                 | 80.03   | 88.91   | 91.52   | 15.85                                  | 15.95   | 15.98   | 16.9    | Annexin A6 OS=Mus musculus GN=Anxa6 PE=1 SV=3                                            |
| P14994     | 8.1480E-04     | 14.25                                 | 21.08   | 20.89   | 20.67   | 3.759                                  | 7.548   | 8.65    | 5.967   | Sodium/potassium-transporting ATPase subunit beta-1 OS=Mus musculus GN=Atplb1 PE=1 SV=1  |
| P40353     | 8.2055E-04     | 5.42                                  | 4.12    | 3.17    | 2.62    | 21.7                                   | 28.42   | 21.7    | 29.34   | 3beta-tubulin OS=Mus musculus GN=Tubb3 PE=1 SV=3                                         |
| Q70318     | 9.0735E-04     | 5.54                                  | 6.318   | 2.808   | 5.904   | 3.606                                  | 34.91   | 33.36   | 41.77   | Band 4.1-like protein 2 OS=Mus musculus GN=Ep4h12 PE=1 SV=2                              |
| P30285     | 9.5908E-04     | 9.497                                 | 13.69   | 14.04   | 11.81   | 2.991                                  | 6.605   | 4.943   | 3.41    | Cyclin-dependent kinase 4 OS=Mus musculus GN=Cdk4 PE=1 SV=1                              |
| P11983     | 9.9369E-04     | 12.51                                 | 13.48   | 13.76   | 14.17   | 74.03                                  | 74.54   | 67.96   | 69.05   | T-complex protein 1 subunit alpha OS=Mus musculus GN=Tcp1 PE=1 SV=3                      |
| P26516     | 1.0206E-03     | 19.79                                 | 25.27   | 21.52   | 29.52   | 9.721                                  | 11.32   | 11.12   | 17.05   | 26S proteasome non-ATPase regulatory subunit 7 OS=Mus musculus GN=PsmD7 PE=1 SV=2        |
| P60766     | 1.0399E-03     | 20.24                                 | 21.17   | 21.63   | 20.67   | 59.42                                  | 59.42   | 59.42   | 59.42   | Homologous recombination 42 homolog OS=Mus musculus GN=Ct42 PE=1 SV=2                    |
| Q92D28     | 1.0701E-03     | 68.78                                 | 73.71   | 71.13   | 70.85   | 46.36                                  | 50.95   | 49.43   | 40.92   | C-1-ethylaldehyde synthase, cytoplasmic OS=Mus musculus GN=Mdhf1 PE=1 SV=4               |
| Q9R0E1     | 1.1799E-03     | 15.04                                 | 17.9    | 9.359   | 11.81   | 8.225                                  | 10.38   | 3.707   | 3.41    | Procollagen-lysine-2-oxoglutarate 5-dioxygenase 3 OS=Mus musculus GN=Plod3 PE=1 SV=1     |
| P47962     | 1.1958E-03     | 11.08                                 | 13.06   | 11.89   | 16.83   | 33.65                                  | 21.7    | 37.07   | 67.34   | 60S ribosomal protein L5 OS=Mus musculus GN=Rpl5 PE=1 SV=3                               |
| Q8KZ24     | 1.2315E-03     | 4.749                                 | 8.424   | 4.679   | 5.904   | 0                                      | 1.887   | 0       | 0       | Condensin complex subunit 1 OS=Mus musculus GN=Ncapd2 PE=1 SV=2                          |
| A0A0R4J0H7 | 1.2315E-03     | 4.749                                 | 8.424   | 4.679   | 5.904   | 0                                      | 1.887   | 0       | 0       | Condensin complex subunit 1 OS=Mus musculus GN=Ncapd2 PE=1 SV=2                          |
| Q80X90     | 1.2448E-03     | 40.36                                 | 27.38   | 42.11   | 20.67   | 121.9                                  | 142.5   | 124.8   | 115.1   | Filamin-B OS=Mus musculus GN=Flbn PE=1 SV=3                                              |
| P42932     | 1.2940E-03     | 15.2                                  | 16.01   | 14.13   | 132.8   | 85.25                                  | 101     | 91.44   | 86.95   | T-complex protein 1 subunit theta OS=Mus musculus GN=Ct8 PE=1 SV=3                       |
| Q61739     | 1.3996E-03     | 28.49                                 | 27.38   | 24.33   | 26.57   | 4.487                                  | 5.661   | 6.65    | 4.262   | Integrin alpha-6 OS=Mus musculus GN=Iga6 PE=1 SV=3                                       |
| P10107     | 1.4120E-03     | 71.23                                 | 76.87   | 65.51   | 76.76   | 17.12                                  | 143.4   | 159.4   | 174.7   | Annexin A1 OS=Mus musculus GN=Anxa1 PE=1 SV=2                                            |
| B7ZC10     | 1.4258E-03     | 2.106                                 | 3.743   | 0       | 2.991   | 6.605                                  | 7.414   | 7.414   | 3.41    | Abl interactor 1 OS=Mus musculus GN=Abi1 PE=1 SV=1                                       |
| B7ZC12     | 1.4258E-03     | 2.106                                 | 3.743   | 0       | 2.991   | 6.605                                  | 7.414   | 7.414   | 3.41    | Abl interactor 1 OS=Mus musculus GN=Abi1 PE=1 SV=1                                       |
| B7ZC13     | 1.4258E-03     | 2.106                                 | 3.743   | 0       | 2.991   | 6.605                                  | 7.414   | 7.414   | 3.41    | Abl interactor 1 OS=Mus musculus GN=Abi1 PE=1 SV=1                                       |
| B7ZC14     | 1.4258E-03     | 2.106                                 | 3.743   | 0       | 2.991   | 6.605                                  | 7.414   | 7.414   | 3.41    | Abl interactor 1 OS=Mus musculus GN=Abi1 PE=1 SV=1                                       |
| B7ZC15     | 1.4258E-03     | 2.106                                 | 3.743   | 0       | 2.991   | 6.605                                  | 7.414   | 7.414   | 3.41    | Abl interactor 1 OS=Mus musculus GN=Abi1 PE=1 SV=1                                       |
| Q8C8W3     | 1.4258E-03     | 2.106                                 | 3.743   | 0       | 2.991   | 6.605                                  | 7.414   | 7.414   | 3.41    | Abl interactor 1 OS=Mus musculus GN=Abi1 PE=1 SV=1                                       |
| Q9JN88     | 1.4258E-03     | 2.106                                 | 3.743   | 0       | 2.991   | 6.605                                  | 7.414   | 7.414   | 3.41    | Abl interactor 1 OS=Mus musculus GN=Abi1 PE=1 SV=1                                       |
| Q9CSH3     | 1.4274E-03     | 31.66                                 | 34.75   | 45.86   | 35.43   | 0                                      | 0       | 0       | 1.705   | Exosome complex conehead RRP44 OS=Mus musculus GN=Dax3 PE=1 SV=4                         |
| P60751     | 1.4984E-03     | 11.87                                 | 6.318   | 9.359   | 8.857   | 2.243                                  | 0       | 0       | 0       | COP9 signalosome complex subunit 4 (Fragment) OS=Mus musculus GN=Cops4 PE=1 SV=1         |
| Q9ZU23     | 1.4958E-03     | 12.66                                 | 16.85   | 19.65   | 20.67   | 0                                      | 2.881   | 3.707   | 1.705   | Superficial viralidic activity 2-like 2 OS=Mus musculus GN=Skiv2l2 PE=1 SV=1             |
| Q92248     | 1.5575E-03     | 9.497                                 | 12.66   | 13.17   | 5.91    | 37.39                                  | 33.32   | 33.32   | 33.32   | Catenin beta-1 OS=Mus musculus GN=Ctnb1 PE=1 SV=1                                        |
| P80314     | 1.5821E-03     | 17.17                                 | 15.27   | 21.52   | 23.32   | 56.83                                  | 66.05   | 64.03   | 102.3   | Proteasome core subunit 1 OS=Mus musculus GN=Cct2 PE=1 SV=4                              |
| P14685     | 1.7174E-03     | 56.19                                 | 61.07   | 66.45   | 53.14   | 18.69                                  | 30.19   | 42.01   | 25.57   | 26S proteasome non-ATPase regulatory subunit 3 OS=Mus musculus GN=PsmD3 PE=1 SV=3        |
| Q3THK7     | 1.7554E-03     | 31.66                                 | 34.75   | 30.88   | 44.28   | 12.71                                  | 10.38   | 9.885   | 15.34   | GMP synthase [glutamine-hydrolyzing] OS=Mus musculus GN=Gmps PE=1 SV=2                   |
| Q87759     | 2.0716E-03     | 6.332                                 | 6.318   | 4.679   | 5.904   | 2.243                                  | 0       | 0       | 0       | Ubiquitin-protein ligase E3A OS=Mus musculus GN=Ube3a PE=1 SV=2                          |
| Q91H59     | 2.1055E-03     | 105.9                                 | 101.1   | 91.52   | 91.52   | 97.1                                   | 86.91   | 91.44   | 81.83   | Myosin-10 OS=Mus musculus GN=Myh10 PE=1 SV=1                                             |
| Q9Z1F9     | 2.0945E-03     | 37.2                                  | 36.86   | 40.24   | 38.38   | 14.21                                  | 16.98   | 13.59   | 6.819   | SUMO-activating enzyme subunit 2 OS=Mus musculus GN=Uba2 PE=1 SV=1                       |
| F7D5L2     | 2.0945E-03     | 10.29                                 | 10.53   | 11.23   | 14.76   | 2.991                                  | 3.74    | 4.943   | 5.115   | Methylosome protein 50 (Fragment) OS=Mus musculus GN=Wdr77 PE=1 SV=1                     |
| Q91ZK7     | 2.0947E-03     | 0                                     | 3.159   | 0       | 5.904   | 37.39                                  | 33.02   | 28.42   | 28.98   | Prolong-density lipoprotein receptor-related protein 1 OS=Mus musculus GN=Lrp1 PE=1 SV=1 |
| A0A0R4J0J9 | 2.0947E-03     | 0                                     | 3.159   | 0       | 5.904   | 37.39                                  | 33.02   | 28.42   | 28.98   | Low density lipoprotein receptor-related protein 1 OS=Mus musculus GN=Lrp1 PE=1 SV=1     |
| F8VQJ7     | 2.1025E-03     | 28.49                                 | 27.38   | 24.33   | 26.57   | 33.69                                  | 37.49   | 37.49   | 71.6    | Laminin subunit gamma-2 OS=Mus musculus GN=Lamg2 PE=1 SV=1                               |
| Q8C1A5     | 2.1280E-03     | 53.03                                 | 38.96   | 53.34   | 38.38   | 3.739                                  | 2.831   | 0       | 1.705   | Thimet oligopeptidase OS=Mus musculus GN=Thop1 PE=1 SV=1                                 |
| A0A0R4J2Y0 | 2.1280E-03     | 53.03                                 | 38.96   | 53.34   | 38.38   | 3.739                                  | 2.831   | 0       | 1.705   | Thimet oligopeptidase OS=Mus musculus GN=Thop1 PE=1 SV=1                                 |
| Q91JL2     | 2.1553E-03     | 25.33                                 | 23.17   | 19.65   | 20.67   | 7.478                                  | 6.605   | 6.178   | 9.377   | 4-methylumbelliferone dehydrogenase OS=Mus musculus GN=Aldh9a1 PE=1 SV=1                 |
| Q3L367     | 2.1553E-03     | 25.33                                 | 23.17   | 19.65   | 20.67   | 7.478                                  | 6.605   | 6.178   | 9.377   | 4-methylumbelliferone dehydrogenase OS=Mus musculus GN=Aldh9a1 PE=1 SV=1                 |
| Q91E18     | 2.2982E-03     | 14.64                                 | 21.06   | 18.37   | 20.67   | 15.7                                   | 20.67   | 15.7    | 0.5     | 5-formylglutathione hydrolase OS=Mus musculus GN=Fglh1 PE=1 SV=1                         |
| P10639     | 2.3325E-03     | 0                                     | 8.424   | 10.29   | 17.71   | 11.96                                  | 23.59   | 22.24   | 3.88    | Thoredoxin OS=Mus musculus GN=Txn PE=1 SV=1                                              |
| P49717     | 2.3613E-03     | 39.57                                 | 48.44   | 41.18   | 44.28   | 17.95                                  | 16.98   | 21.01   | 17.05   | DNA replication licensing factor MCM4 OS=Mus musculus GN=Mcm4 PE=1 SV=1                  |
| Q9D071     | 2.4385E-03     | 11.87                                 | 9.477   | 12.17   | 8.857   | 7.478                                  | 6.605   | 7.414   | 5.115   | NHP2-like protein 1 OS=Mus musculus GN=Smu13 PE=1 SV=4                                   |
| A0A0R4J049 | 2.4634E-03     | 14.25                                 | 15.8    | 12.17   | 14.76   | 5.234                                  | 7.548   | 4.943   | 9.377   | Protein arginine N-methyltransferase 5 OS=Mus musculus GN=Pmt5 PE=1 SV=1                 |
| Q92228     | 2.5500E-03     | 88.21                                 | 71.6    | 85.16   | 91.52   | 29.52                                  | 21.24   | 29.52   | 11.4    | Aspartic acid aminotransferase, cytoplasmic OS=Mus musculus GN=Dars PE=1 SV=2            |
| A2AS01     | 2.5970E-03     | 31.66                                 | 31.59   | 39.31   | 14.76   | 68.05                                  | 69.99   | 77.85   | 52      | Agrin OS=Mus musculus GN=Agrn PE=1 SV=1                                                  |
| Q8BT50     | 2.5970E-03     | 41.16                                 | 38.96   | 42.11   | 32.47   | 9.721                                  | 8.492   | 0       | 6.819   | DEAD (Asp-Glu-Ala-Asp) box polypeptide 5 OS=Mus musculus GN=Ddx5 PE=1 SV=1               |
| P43277     | 2.6189E-03     | 28.49                                 | 25.27   | 30.88   | 38.38   | 1.496                                  | 1.887   | 0       | 0       | Histone H1.3 OS=Mus musculus GN=H1h1 PE=1 SV=2                                           |
| P15864     | 2.6189E-03     | 28.49                                 | 25.27   | 30.88   | 38.38   | 1.496                                  | 1.887   | 0       | 0       | Histone H1.3 OS=Mus musculus GN=H1h1 PE=1 SV=2                                           |
| D3Z2H1     | 2.6231E-03     | 44.28                                 | 52.67   | 51.47   | 5.904   | 20.19                                  | 16.98   | 21.01   | 22.16   | Catenin delta-1 OS=Mus musculus GN=Ctnd1 PE=1 SV=1                                       |
| E9QKZ8     | 2.6231E-03     | 0                                     | 5.265   | 3.743   | 5.904   | 20.19                                  | 16.98   | 21.01   | 22.16   | Catenin delta-1 OS=Mus musculus GN=Ctnd1 PE=1 SV=1                                       |
| Q7TPR4     | 2.7395E-03     | 22.16                                 | 27.38   | 23.34   | 29.52   | 70.29                                  | 74.54   | 51.9    | 71.6    | Alpha-actinin-1 OS=Mus musculus GN=Actn1 PE=1 SV=1                                       |
| A2A787     | 2.7550E-03     | 2.374                                 | 0       | 3.743   | 0       | 8.225                                  | 8.492   | 12.36   | 10.23   | Tyrosine-tRNA ligase OS=Mus musculus GN=Yars PE=1 SV=1</                                 |



|                         |             |       |       |       |       |       |       |       |                                                                                                                                        |
|-------------------------|-------------|-------|-------|-------|-------|-------|-------|-------|----------------------------------------------------------------------------------------------------------------------------------------|
| AA0A0R4140              | 6.9606E-03  | 15.04 | 18.95 | 18.72 | 20.67 | 8.225 | 6.605 | 11.12 | 8.524 Clustered mitochondria protein homolog OS=Mus musculus GN=Cluh PE=1 SV=1                                                         |
| E9PZV7                  | 7.0650E-03  | 7.123 | 10.53 | 10.29 | 5.904 | 2.243 | 6.605 | 4.943 | 3.41 Cyclin-dependent kinase 4 (Fragment) OS=Mus musculus GN=Cdk4 PE=1 SV=1                                                            |
| P06745                  | 7.1050E-03  | 7.449 | 8.424 | 6.551 | 0     | 14.21 | 19.81 | 22.24 | 18.75 Glucose-6-phosphate isomerase OS=Mus musculus GN=Gpi PE=1 SV=4                                                                   |
| Q9Z2E8                  | 7.1050E-03  | 1.583 | 0     | 0     | 0     | 5.992 | 6.605 | 8.65  | 5.115 Serine/threonine protein kinase TAO1 OS=Mus musculus GN=Taok1 PE=1 SV=1                                                          |
| P15532                  | 7.1118E-03  | 18.2  | 27.38 | 20.59 | 11.81 | 50.85 | 50.95 | 69.2  | 44.33 Nucleoside diphosphate kinase A OS=Mus musculus GN=Nme1 PE=1 SV=1                                                                |
| Q9CWF2                  | 7.2181E-03  | 24.3  | 20.64 | 22.27 | 135.8 | 296.9 | 280.2 | 266.9 | 224.2 Tubulin beta-2B chain OS=Mus musculus GN=Tab2b PE=1 SV=1                                                                         |
| Q8BV09                  | 7.2258E-03  | 18.28 | 57.92 | 45.86 | 6.2   | 12.71 | 19.81 | 25.95 | 17.05 26S proteasome regulatory subunit 7 OS=Mus musculus GN=Psmc2 PE=1 SV=1                                                           |
| Q61191                  | 7.2890E-03  | 15.04 | 9.477 | 11.23 | 9.481 | 1.496 | 2.831 | 0     | 3.41 Host cell factor 1 OS=Mus musculus GN=Hcfc1 PE=1 SV=1                                                                             |
| PCV124                  | 7.2979E-03  | 109.9 | 96.39 | 135.9 | 13.8  | 59.2  | 59.2  | 59.2  | 80.98 Protein Gm576 OS=Mus musculus GN=Gm576 PE=1 SV=2                                                                                 |
| D25444                  | 7.2876E-03  | 104.5 | 112.7 | 102.9 | 135.8 | 27.67 | 28.31 | 58.08 | 86.1 40S ribosomal protein S2 OS=Mus musculus GN=Rps2 PE=1 SV=3                                                                        |
| Q88342                  | 7.3340E-03  | 21.37 | 21.06 | 19.65 | 14.76 | 29.16 | 28.31 | 24.71 | 25.57 WD repeat-containing protein 1 OS=Mus musculus GN=Wdr1 PE=1 SV=3                                                                 |
| P46471                  | 7.4418E-03  | 14.28 | 58.97 | 45.86 | 6.2   | 13.46 | 19.81 | 25.95 | 17.05 26S proteasome regulatory subunit 1 OS=Mus musculus GN=Psmc2 PE=1 SV=1                                                           |
| A0A06W556               | 7.5288E-03  | 48.25 | 15.8  | 19.65 | 23.62 | 14.96 | 4.718 | 3.707 | 1.705 Adenylosuccinate synthetase isozyme 2 OS=Mus musculus GN=Adss PE=1 SV=2                                                          |
| Q9CQV9                  | 7.5463E-03  | 37.3  | 35.8  | 42.11 | 38.38 | 38.3  | 38.3  | 208.8 | 27.9 Fibronectin OS=Mus musculus GN=Fn1 PE=1 SV=1                                                                                      |
| FRP9J9                  | 7.5996E-03  | 0     | 5.265 | 7.487 | 0     | 11.96 | 12.27 | 13.59 | 10.23 Interferon-induced transmembrane protein 3 OS=Mus musculus GN=Ifitm3 PE=1 SV=1                                                   |
| Q9CQV9                  | 7.6036E-03  | 15.04 | 14.74 | 8.423 | 11.81 | 4.487 | 0     | 0     | 4.262 Insulin-degrading enzyme (Fragment) OS=Mus musculus GN=Ide PE=1 SV=1                                                             |
| Q9CQV9                  | 7.7732E-03  | 19.41 | 27.38 | 20.59 | 11.81 | 48.6  | 50.95 | 69.2  | 43.47 Nucleoside diphosphate kinase (Fragment) OS=Mus musculus GN=Nme1 PE=1 SV=1                                                       |
| Q9Z0B9                  | 7.7924E-03  | 0.747 | 6.318 | 11.23 | 14.76 | 2.243 | 0     | 0     | 2.557 FACT complex subunit SPT16 OS=Mus musculus GN=Sup16 PE=1 SV=2                                                                    |
| G35946                  | 7.7924E-03  | 6.318 | 11.23 | 6.318 | 11.23 | 6.318 | 11.23 | 6.318 | 2.557 FACT complex subunit SPT16 OS=Mus musculus GN=Sup16 PE=1 SV=1                                                                    |
| D3Z536                  | 7.8935E-03  | 94.97 | 103.2 | 91.71 | 135.8 | 17.2  | 20.76 | 53.13 | 78.42 Protein Gm525 OS=Mus musculus GN=Gm525 PE=3 SV=1                                                                                 |
| P68372                  | 7.9313E-03  | 24.61 | 21.59 | 23.31 | 135.8 | 311.1 | 292.5 | 281.7 | 239.5 Tubulin beta-4B chain OS=Mus musculus GN=Tab4b PE=1 SV=1                                                                         |
| B1AUX2                  | 7.9058E-03  | 15.04 | 9.477 | 12.17 | 11.81 | 1.496 | 2.831 | 0     | 3.41 Host cell factor 1 OS=Mus musculus GN=Hcfc1 PE=1 SV=1                                                                             |
| PG2874                  | 7.9091E-03  | 85.48 | 97.5  | 70.19 | 106.3 | 33.65 | 30.19 | 39.54 | 37.51 Guanine nucleotide-binding protein (G)β(S)(T) subunit beta-1 OS=Mus musculus GN=Gnb1 PE=1 SV=3                                   |
| Q8BMJ2                  | 7.9445E-03  | 69.65 | 70.55 | 12.76 | 67.9  | 50.1  | 48.12 | 39.54 | 52 Leucine-RNAase, cytoplasmic OS=Mus musculus GN=Lara PE=1 SV=2                                                                       |
| Q9PL27                  | 8.1298E-03  | 15.04 | 10.53 | 11.23 | 17.71 | 0     | 3.774 | 0     | 3.41 GMP reductase 2 OS=Mus musculus GN=Gmp2 PE=1 SV=2                                                                                 |
| E9QNN1                  | 8.1965E-03  | 117.1 | 91.61 | 85.16 | 73.8  | 29.16 | 32.08 | 27.19 | 33.24 ATP-dependent RNA helicase A OS=Mus musculus GN=Dhx9 PE=1 SV=1                                                                   |
| AA0A0W7PL5              | 8.1965E-03  | 117.1 | 91.61 | 85.16 | 73.8  | 29.16 | 32.08 | 27.19 | 33.24 ATP-dependent RNA helicase A OS=Mus musculus GN=Dhx9 PE=1 SV=1                                                                   |
| Q3UHL6                  | 8.2428E-03  | 38.78 | 36.86 | 43.99 | 41.33 | 398.6 | 363.2 | 208.8 | 284.7 Fibronectin OS=Mus musculus GN=Fn1 PE=1 SV=1                                                                                     |
| P52291                  | 8.2573E-03  | 3.771 | 14.04 | 30.74 | 5.982 | 3.74  | 6.78  | 7.8   | 3.19 Importin subunit alpha-1 OS=Mus musculus GN=Imp4 PE=1 SV=2                                                                        |
| Q7TMM9                  | 8.2655E-03  | 240.6 | 204.3 | 223.7 | 129.9 | 300.6 | 281.2 | 266.9 | 224.2 Tubulin beta-2A chain OS=Mus musculus GN=Tab2a PE=1 SV=1                                                                         |
| Q8K354                  | 8.3182E-03  | 3.166 | 0     | 0     | 11.22 | 13.21 | 13.64 | 0     | 13.64 Carbonyl reductase [NADPH] 3 OS=Mus musculus GN=Cbr3 PE=1 SV=1                                                                   |
| JQ3NW0                  | 8.5121E-03  | 45.11 | 48.44 | 37.43 | 35.43 | 5.982 | 12.27 | 13.59 | 16.2 DNA (cytosine-5)-methyltransferase OS=Mus musculus GN=Dnmt1 PE=1 SV=1                                                             |
| P15864                  | 8.5121E-03  | 45.11 | 48.44 | 37.43 | 35.43 | 5.982 | 12.27 | 13.59 | 16.2 DNA (cytosine-5)-methyltransferase 1 OS=Mus musculus GN=Dnmt1 PE=1 SV=5                                                           |
| AA0A0W7RS0              | 8.5145E-03  | 38.78 | 36.86 | 43.99 | 41.33 | 370.8 | 358.1 | 208.8 | 288.1 Fibronectin OS=Mus musculus GN=Fn1 PE=1 SV=1                                                                                     |
| Q9Z0E5                  | 8.5396E-03  | 0     | 0     | 1.872 | 0     | 5.982 | 4.718 | 7.414 | 2.557 Farnesyl pyrophosphate synthase OS=Mus musculus GN=Fpps PE=1 SV=1                                                                |
| D3Z2H7                  | 8.5584E-03  | 0     | 5.265 | 3.743 | 5.904 | 18.69 | 13.21 | 17.3  | 21.31 Catenin delta-1 OS=Mus musculus GN=Ctnd1 PE=1 SV=1                                                                               |
| P11276                  | 8.5928E-03  | 38.78 | 36.86 | 43.99 | 41.33 | 401.5 | 371.7 | 208.8 | 287.3 Fibronectin OS=Mus musculus GN=Fn1 PE=1 SV=4                                                                                     |
| E9QZU6                  | 8.5939E-03  | 9.497 | 16.85 | 18.72 | 23.62 | 0     | 2.831 | 0     | 2.557 Structural maintenance of chromosomes protein OS=Mus musculus GN=Smc4 PE=1 SV=1                                                  |
| Q8CG47                  | 8.5939E-03  | 9.497 | 16.85 | 18.72 | 23.62 | 0     | 2.831 | 0     | 2.557 Structural maintenance of chromosomes protein 4 OS=Mus musculus GN=Smc4 PE=1 SV=1                                                |
| contaminant_UBIQUITIN02 | 8.7200E-03  | 39.57 | 44.23 | 39.31 | 29.52 | 80.01 | 64.16 | 61.78 | 59.67 no description                                                                                                                   |
| Z4YL8                   | 8.8100E-03  | 14.25 | 18.95 | 18.72 | 20.67 | 8.225 | 5.661 | 9.885 | 8.524 Clustered mitochondria protein homolog OS=Mus musculus GN=Cluh PE=1 SV=1                                                         |
| P62908                  | 8.8084E-03  | 95.77 | 81.08 | 95.46 | 73.8  | 60.57 | 56.61 | 67.96 | 58.82 40S ribosomal protein S3 OS=Mus musculus GN=Rps3 PE=1 SV=1                                                                       |
| P14609                  | 8.9384E-03  | 24.54 | 25.27 | 28.08 | 17.71 | 41.87 | 38.68 | 49.43 | 27.28 Protein S100-A6 OS=Mus musculus GN=S100A6 PE=1 SV=3                                                                              |
| Q9Z793                  | 8.9384E-03  | 316.4 | 26.3  | 30.6  | 42.2  | 73.8  | 68.9  | 65.6  | 92.4 Basement membrane heparan sulfate proteoglycan core protein OS=Mus musculus GN=Hspg2 PE=1 SV=1                                    |
| P97427                  | 9.1695E-03  | 6.332 | 3.159 | 7.487 | 0     | 14.21 | 16.98 | 14.83 | 13.64 Dihydropyrimidine-related protein 1 OS=Mus musculus GN=Cnmp1 PE=1 SV=1                                                           |
| AA0A0W7SN6              | 9.2657E-03  | 37.2  | 36.86 | 43.99 | 41.33 | 377.6 | 349.1 | 194   | 271.1 Fibronectin OS=Mus musculus GN=Fn1 PE=1 SV=1                                                                                     |
| P62259                  | 9.2766E-03  | 26.91 | 35.8  | 32.76 | 41.33 | 50.85 | 50.95 | 43.25 | 60.52 14-3-3 protein epsilon OS=Mus musculus GN=Ywhae PE=1 SV=1                                                                        |
| P17918                  | 9.2766E-03  | 42.74 | 41.07 | 34.63 | 47.23 | 31.41 | 27.36 | 25.95 | 28.13 Proliferating cell nuclear antigen OS=Mus musculus GN=Pna PE=1 SV=2                                                              |
| Q7TMB8                  | 9.5097E-03  | 24.61 | 23.31 | 23.31 | 23.31 | 24.61 | 23.31 | 23.31 | 14.49 Probable ATP-dependent RNA helicase DDX1 OS=Mus musculus GN=DDX1 PE=1 SV=1                                                       |
| Q6Z159                  | 9.5305E-03  | 18.2  | 14.74 | 14.04 | 17.71 | 36.64 | 27.36 | 23.48 | 27.28 Rho-related GTP-binding protein RhoC OS=Mus musculus GN=Rhoc PE=1 SV=2                                                           |
| Q9Z1N5                  | 9.5894E-03  | 26.91 | 29.48 | 30.88 | 38.38 | 17.95 | 13.21 | 13.59 | 16.2 Spliceosome RNA helicase Ddx39b OS=Mus musculus GN=Ddx39b PE=1 SV=1                                                               |
| Q6PHC1                  | 9.6643E-03  | 116.3 | 133.7 | 127.3 | 100.4 | 80.76 | 79.25 | 79.08 | 76.72 Alpha-amylase OS=Mus musculus GN=Eno1 PE=1 SV=1                                                                                  |
| Q9ZD56                  | 9.6922E-03  | 3.957 | 4.212 | 3.473 | 0     | 21.69 | 16.98 | 12.34 | 19.61 Serine protease 23 OS=Mus musculus GN=Prss23 PE=2 SV=2                                                                           |
| Q63844                  | 9.8165E-03  | 32.45 | 31.17 | 17.78 | 17.71 | 11.22 | 11.22 | 11.22 | 6.819 Mitogen-activated protein kinase 3 OS=Mus musculus GN=Mapk3 PE=1 SV=5                                                            |
| P14131                  | 9.8561E-03  | 35.62 | 31.59 | 34.63 | 47.23 | 20.19 | 19.81 | 17.3  | 21.31 40S ribosomal protein S16 OS=Mus musculus GN=Rps16 PE=1 SV=4                                                                     |
| Q9J100                  | 10.001E-02  | 0     | 0     | 1.872 | 0     | 2.243 | 3.774 | 4.943 | 5.115 Phospholipid scramblase 1 OS=Mus musculus GN=Pscr1 PE=1 SV=1                                                                     |
| Q91ZV3                  | 10.001E-02  | 22.95 | 28.43 | 26.32 | 35.43 | 8.973 | 11.32 | 12.36 | 8.524 SWI5N1-related matrix-associated actin-dependent regulator of chromatin subfamily A member 5 OS=Mus musculus GN=Smrac5 PE=1 SV=1 |
| Q88K63                  | 10.9936E-02 | 4.749 | 2.106 | 0     | 5.904 | 0     | 12.27 | 19.77 | 16.2 Inactive tyrosine-protein kinase 7 OS=Mus musculus GN=PtK7 PE=1 SV=1                                                              |
| Q9J016                  | 10.9936E-02 | 30.7  | 26.32 | 29.95 | 35.43 | 18.69 | 16.98 | 14.83 | 14.49 Probable ATP-dependent RNA helicase DDX1 OS=Mus musculus GN=DDX1 PE=1 SV=1                                                       |
| Z4YJ55                  | 10.9345E-02 | 24.54 | 24.22 | 25.27 | 14.76 | 42.62 | 43.4  | 56.84 | 29.84 Agrin OS=Mus musculus GN=Agrn PE=1 SV=1                                                                                          |
| Q9CR57                  | 10.4040E-02 | 7.123 | 5.265 | 5.615 | 0     | 11.22 | 12.27 | 13.59 | 10.23 60S ribosomal protein L14 OS=Mus musculus GN=Rpl14 PE=1 SV=3                                                                     |
| B7ZW11                  | 10.402E-02  | 11.08 | 10.53 | 14.04 | 8.857 | 0     | 0     | 0     | 3.41 CCR4-NOT transcription complex subunit 1 OS=Mus musculus GN=Cnot1 PE=1 SV=1                                                       |
| Q6Z008                  | 10.402E-02  | 11.08 | 10.53 | 14.04 | 8.857 | 0     | 0     | 0     | 3.41 CCR4-NOT transcription complex subunit 1 OS=Mus musculus GN=Cnot1 PE=1 SV=2                                                       |
| P80315                  | 10.404E-02  | 87.4  | 87.4  | 94.52 | 73.8  | 59.82 | 47.18 | 45.72 | 17.4 Fibronectin protein 1 subunit delta OS=Mus musculus GN=Fn3 PE=1 SV=3                                                              |
| Q3U741                  | 10.5101E-02 | 30.87 | 26.33 | 29.01 | 35.43 | 18.69 | 16.98 | 14.83 | 14.49 DEAD (Asp-Glu-Ala-Asp) box polypeptide 17, isoform CRA_1 OS=Mus musculus GN=DDx17 PE=1 SV=1                                      |
| P70168                  | 10.5044E-02 | 40.36 | 40.01 | 45.86 | 41.33 | 47.11 | 49.06 | 49.43 | 49.44 Importin subunit beta-1 OS=Mus musculus GN=Kpnb1 PE=1 SV=2                                                                       |
| JQ3MG5                  | 10.6094E-02 | 100.5 | 107.4 | 94.52 | 135.8 | 20.19 | 23.59 | 56.84 | 83.54 Protein Gm578 OS=Mus musculus GN=Gm578 PE=3 SV=1                                                                                 |
| O55131                  | 10.7144E-02 | 22.16 | 23.17 | 31.82 | 20.67 | 47.11 | 36.8  | 44.48 | 44.95 Septin-7 OS=Mus musculus GN=Sept7 PE=1 SV=1                                                                                      |
| E9QIG8                  | 10.7144E-02 | 22.16 | 23.17 | 31.82 | 20.67 | 47.11 | 36.8  | 44.48 | 34.95 Septin-8 OS=Mus musculus GN=Sept8 PE=1 SV=1                                                                                      |
| E9Q9F5                  | 10.7144E-02 | 22.16 | 23.17 | 31.82 | 20.67 | 47.11 | 36.8  | 44.48 | 34.95 Septin-9 OS=Mus musculus GN=Sept9 PE=1 SV=2                                                                                      |
| Q8VEE4                  | 10.8181E-02 | 10.29 | 15.8  | 13.1  | 17.71 | 2.243 | 7.548 | 9.885 | 10.23 Replication protein A 70 kDa DNA-binding subunit OS=Mus musculus GN=Rpa1 PE=1 SV=1                                               |
| P15379                  | 11.0077E-02 | 3.957 | 5.265 | 5.615 | 0     | 10.47 | 10.38 | 9.885 | 9.377 CD44 antigen OS=Mus musculus GN=Cd44 PE=1 SV=3                                                                                   |
| Q9J9K7                  | 11.3457E-02 | 13.45 | 14.74 | 7.487 | 11.81 | 4.487 | 0     | 0     | 4.262 Insulin-degrading enzyme OS=Mus musculus GN=Ide PE=1 SV=1                                                                        |
| P19324                  | 11.3397E-02 | 10.29 | 6.318 | 7.487 | 0     | 24.68 | 28.31 | 19.77 | 23.71 Septin H1 OS=Mus musculus GN=SeptH1 PE=1 SV=1                                                                                    |
| Q5SWN2                  | 11.4191E-02 | 10.29 | 15.8  | 13.1  | 17.71 | 2.243 | 7.548 | 9.885 | 9.377 Replication protein A 70 kDa DNA-binding subunit OS=Mus musculus GN=Rpa1 PE=1 SV=2                                               |
| P97310                  | 11.4433E-02 | 69.65 | 85.29 | 86.1  | 64.95 | 47.86 | 63.21 | 49.43 | 48.59 DNA replication licensing factor MCM2 OS=Mus musculus GN=Mcm2 PE=1 SV=3                                                          |
| Q9OU17                  | 11.602E-02  | 4.749 | 8.424 | 2.808 | 5.904 | 1.496 | 2.831 | 0     | 0 Long-chain fatty-acyl-CoA ligase 4 OS=Mus musculus GN=Acsl4 PE=1 SV=2                                                                |
| Q8VDW0                  | 11.6375E-02 | 29.28 | 21.06 | 23.4  | 14.76 | 12.71 | 5.661 | 7.414 | 8.524 ATP-dependent RNA helicase DDX29A OS=Mus musculus GN=DDX29A PE=1 SV=1                                                            |
| P26231                  | 11.9953E-02 | 32.45 | 37.91 | 49.62 | 32.47 | 29.12 | 22.24 | 20.67 | 30.69 Catenin alpha-1 OS=Mus musculus GN=Ctnd1 PE=1 SV=1                                                                               |
| Q8VD13                  | 12.0545E-02 | 2.374 | 4.212 | 2.808 | 0     | 9.721 | 8.492 | 12.36 | 11.08 Vigilin OS=Mus musculus GN=Hdbp PE=1 SV=1                                                                                        |
| Q61235                  | 12.083E-02  | 6.332 | 0     | 0     | 0     | 8.973 | 4.718 | 6.178 | 3.41 Beta-2-syntrophin OS=Mus musculus GN=Snb2 PE=1 SV=2                                                                               |
| P10126                  | 12.1811E-02 | 23.03 | 20.95 | 23.86 | 22.14 | 335.7 | 322.7 | 308.9 | 268.5 Elongation factor 1-alpha 1 OS=Mus musculus GN=Ef1a1 PE=1 SV=3                                                                   |
| E9QZ25                  | 12.3364E-02 | 0     | 5.265 | 3.743 | 5.904 | 19.44 | 12.27 | 18.54 | 20.46 Catenin delta-1 OS=Mus musculus GN=Ctnd1 PE=1 SV=1                                                                               |
| P97760                  | 12.553E-02  | 7.123 | 8.424 | 5.11  | 8.857 | 14.96 | 2.471 | 3.774 | 2.557 DNA-directed RNA polymerase II subunit RPB3 OS=Mus musculus GN=Polr2c PE=1 SV=2                                                  |
| AA0A1DRML8              | 12.553E-02  | 7.915 | 8.424 | 13.1  | 8.857 | 14.96 | 0     | 0     | 2.557 DNA-directed RNA polymerase II subunit RPB3 OS=Mus musculus GN=Polr2c PE=1 SV=1                                                  |
| AA0A1RXP4               | 12.703E-02  | 21.37 | 17.9  | 16.85 | 17.71 | 10.47 | 11.32 | 0     | 6.819 Mitogen-activated protein kinase (Fragment) OS=Mus musculus GN=Mapk3 PE=1 SV=1                                                   |
| P48036                  | 12.7255E-02 | 57.78 | 43.17 | 39.31 | 47.23 | 71.04 | 63.21 | 72.91 | 71.6 Annexin A5 OS=Mus musculus GN=Anxa5 PE=1 SV=1                                                                                     |
| P48078                  | 12.733E-02  | 15.83 | 12.64 | 16.85 | 20.67 | 38.88 | 43.4  | 40.78 | 24.51 Prelamin-A/C OS=Mus musculus GN=Lmna PE=1 SV=2                                                                                   |
| AA0A1OTV5               | 12.813E-02  | 37.2  | 37.2  | 35.56 | 35.56 | 24.3  | 24.3  | 24.3  | 24.72 Proliferating cell nuclear antigen OS=Mus musculus GN=Pna PE=3 SV=1                                                              |
| G5E839                  | 12.841E-02  | 71.56 | 78.98 | 87.04 | 64.95 | 53.09 | 44.34 | 42.01 | 46.03 T-complex protein 1 subunit delta OS=Mus musculus GN=Ccd4 PE=1 SV=1                                                              |
| Q9O916                  | 12.940E-02  | 23.27 | 25.27 | 29.01 | 44.28 | 8.225 | 13.21 | 7.414 | 17.9 Histone deacetylase 1 OS=Mus musculus GN=Hdac1 PE=1 SV=1                                                                          |
| Q70133                  | 12.983E-02  | 117.1 | 88.45 | 84.23 | 67.9  | 28.42 | 32.08 | 27.19 | 33.24 ATP-dependent RNA helicase A OS=Mus musculus GN=Dhx9 PE=1 SV=2                                                                   |
| P80317                  | 12.9972E-02 | 94.97 | 105.3 | 100.1 | 67.9  | 59.87 | 55.67 | 63.02 | 19.7 Proliferation-associated protein 24 OS=Mus musculus GN=P24 PE=1 SV=3                                                              |
| Q5S840                  | 13.023E-02  | 32.45 | 37.91 | 49.62 | 32.47 | 17.2  | 18.54 | 14.83 | 5.967 Glutathione S-transferase Mu 1 OS=Mus musculus GN=Gstm1 PE=1 SV=2                                                                |
| A2AE89                  | 13.079E-02  | 3.957 | 0     | 0     | 0     | 6.73  | 7.548 | 4.943 | 5.967 Glutathione S-transferase Mu 1 OS=Mus musculus GN=Gstm1 PE=1                                                                     |

|                    |            |       |       |       |       |        |       |       |       |                                                                                                                                      |
|--------------------|------------|-------|-------|-------|-------|--------|-------|-------|-------|--------------------------------------------------------------------------------------------------------------------------------------|
| O08R10             | 1.9259E-02 | 16.12 | 23.17 | 21.52 | 14.76 | 7.478  | 10.38 | 12.36 | 10.23 | 116 kDa US small nuclear ribonucleoprotein component OS=Mus musculus GN=Efhd2 PE=1 SV=1                                              |
| A2AH85             | 1.9259E-02 | 22.16 | 23.17 | 21.52 | 14.76 | 7.478  | 10.38 | 12.36 | 10.23 | 116 kDa US small nuclear ribonucleoprotein component OS=Mus musculus GN=Efhd2 PE=1 SV=1                                              |
| O99M86             | 1.9456E-02 | 7.915 | 9.477 | 14.97 | 8.857 | 3.739  | 1.887 | 3.707 | 3.41  | Serrate RNA effector molecule homolog OS=Mus musculus GN=Srrf PE=1 SV=1                                                              |
| Q7TPV4             | 1.9451E-02 | 32.45 | 46.33 | 38.37 | 29.52 | 13.46  | 16.04 | 16.06 | 20.46 | Myb-binding protein 1A OS=Mus musculus GN=Mybl1 PE=1 SV=2                                                                            |
| Q8R2Q8             | 1.9477E-02 | 4.749 | 0     | 7.487 | 0     | 8.973  | 10.38 | 12.36 | 5.967 | Bone marrow stromal antigen 2 OS=Mus musculus GN=Ba2 PE=1 SV=1                                                                       |
| P63101             | 1.9830E-02 | 61.73 | 78.98 | 73    | 103.3 | 40.38  | 29.25 | 51.9  | 59.67 | 14-3-3 protein zeta/delta OS=Mus musculus GN=Ywhaz PE=1 SV=1                                                                         |
| Q9Z2F4             | 1.9995E-02 | 16.59 | 1.158 | 16.85 | 11.22 | 23.22  | 219.8 | 187.8 | 158.6 | Tubulin beta-6 chain OS=Mus musculus GN=Tuub6 PE=1 SV=1                                                                              |
| Q9Z2W7             | 2.0166E-02 | 0     | 3     | 2.59  | 4.679 | 0      | 14.21 | 13.21 | 8.65  | 17.9 Serine hydroxymethyltransferase OS=Mus musculus GN=Shmt2 PE=1 SV=1                                                              |
| F8WJ88             | 2.0318E-02 | 9.447 | 14.74 | 5.615 | 11.81 | 17.2   | 17.2  | 17.2  | 17.9  | H3c-U19-interacting protein OS=Mus musculus GN=Mybl4 PE=1 SV=1                                                                       |
| Q6Z318             | 2.0297E-02 | 12.66 | 18.95 | 20.59 | 20.67 | 8.225  | 3.744 | 3.707 | 5.115 | Transcription intermediary factor 1-beta OS=Mus musculus GN=Trim28 PE=1 SV=3                                                         |
| Q99J14             | 2.0300E-02 | 35.62 | 36.86 | 33.69 | 32.47 | 10.47  | 21.7  | 23.48 | 21.31 | 26S proteasome non-ATPase regulatory subunit 6 OS=Mus musculus GN=Psm6 PE=1 SV=1                                                     |
| Q99R10             | 2.0435E-02 | 18.99 | 14.74 | 9.359 | 14.76 | 2.243  | 3.774 | 3.707 | 5.967 | Metastasis-associated protein MTA2 OS=Mus musculus GN=Ma2 PE=1 SV=1                                                                  |
| P09103             | 2.0891E-02 | 2.374 | 0     | 3.743 | 0     | 10.47  | 18.87 | 11.12 | 13.74 | Protein disulfide-isomerase OS=Mus musculus GN=Pdi4 PE=1 SV=2                                                                        |
| P52101             | 2.1008E-02 | 1.583 | 0     | 0     | 0     | 8.225  | 1.887 | 2.71  | 1.705 | Aspartate aminotransferase, cytoplasmic OS=Mus musculus GN=Got1 PE=1 SV=3                                                            |
| Q8VDM6             | 2.1105E-02 | 9.497 | 8.424 | 9.359 | 11.81 | 5.234  | 2.831 | 4.943 | 1.705 | Heterogeneous nuclear ribonucleoprotein U-like protein 1 OS=Mus musculus GN=Hnmpu1 PE=1 SV=1                                         |
| D3Z6N3             | 2.1164E-02 | 19.79 | 21.06 | 21.52 | 23.62 | 12.71  | 13.21 | 18.54 | 12.79 | DNA replication licensing factor MCM7 OS=Mus musculus GN=Mcm7 PE=1 SV=1                                                              |
| P17182             | 2.1348E-02 | 13.61 | 15.16 | 13.85 | 11.22 | 9.497  | 97.18 | 88.97 | 98.03 | Alpha-oncogene OS=Mus musculus GN=Eno1 PE=1 SV=3                                                                                     |
| A2AMW0             | 2.1410E-02 | 20.58 | 24.22 | 24.33 | 26.57 | 36.64  | 51.89 | 35.83 | 38.36 | Capping protein (Actin filament) molecule Z-1, beta, isoform CRA_1 OS=Mus musculus GN=Capzb PE=1 SV=1                                |
| D3YVW6             | 2.1409E-02 | 11.12 | 11.23 | 11.23 | 17.1  | 6.73   | 9.435 | 9.885 | 15.34 | Ubiquitin thioesterase OTUB1 OS=Mus musculus GN=Otbl1 PE=1 SV=1                                                                      |
| Q7QT03             | 2.1409E-02 | 11.08 | 12.64 | 11.23 | 17.71 | 6.73   | 9.435 | 9.885 | 15.34 | Ubiquitin thioesterase OTUB1 OS=Mus musculus GN=Otbl1 PE=1 SV=2                                                                      |
| Q8C052             | 2.1685E-02 | 9.497 | 12.64 | 5.615 | 11.96 | 15.1   | 11.12 | 11.12 | 14.49 | Microtubule-associated protein 1S OS=Mus musculus GN=Map1s PE=1 SV=2                                                                 |
| P16546             | 2.1823E-02 | 16.62 | 12.64 | 16.85 | 8.857 | 21.09  | 24.53 | 23.48 | 23.02 | Spectrin alpha chain, non-erythrocytic 1 OS=Mus musculus GN=Sptan1 PE=1 SV=4                                                         |
| AA04U1R0Q5         | 2.2058E-02 | 30.08 | 27.38 | 21.52 | 50.19 | 8.973  | 11.32 | 8.65  | 15.34 | Cytoplasmic FMRI-interacting protein 1 (Fragment) OS=Mus musculus GN=Cyfp1 PE=1 SV=1                                                 |
| B1AW61             | 2.2323E-02 | 16.62 | 15.8  | 12.17 | 23.62 | 5.967  | 4.718 | 8.65  | 9.377 | Clathrin light chain A OS=Mus musculus GN=Cla PE=1 SV=1                                                                              |
| EP9ZF0             | 2.2299E-02 | 17.41 | 26.33 | 21.52 | 8.857 | 38.88  | 37.74 | 54.37 | 46.88 | Nucleoside diphosphate kinase OS=Mus musculus GN=Gnd20390 PE=1 SV=1                                                                  |
| B1AZ46             | 2.2450E-02 | 2.374 | 2.106 | 0     | 0     | 7.478  | 4.718 | 4.943 | 8.524 | Brain-specific angiogenesis inhibitor 1-associated protein 2 OS=Mus musculus GN=Baip2 PE=1 SV=1                                      |
| Q8BKX1             | 2.2450E-02 | 2.374 | 2.106 | 0     | 0     | 7.478  | 4.718 | 4.943 | 8.524 | Brain-specific angiogenesis inhibitor 1-associated protein 2 OS=Mus musculus GN=Baip2 PE=1 SV=2                                      |
| R90RF5             | 2.2736E-02 | 11.08 | 11.58 | 9.359 | 8.857 | 21.09  | 21.7  | 22.24 | 31.54 | Dextrin OS=Mus musculus GN=Dxn PE=1 SV=3                                                                                             |
| A2APM1             | 2.2903E-02 | 3.957 | 5.265 | 6.551 | 10.47 | 9.435  | 9.885 | 9.885 | 10.23 | CD44 antigen OS=Mus musculus GN=CD44 PE=1 SV=1                                                                                       |
| A2APM5             | 2.3080E-02 | 3.957 | 5.265 | 6.551 | 10.47 | 10.38  | 9.885 | 9.885 | 10.23 | CD44 antigen OS=Mus musculus GN=CD44 PE=1 SV=1                                                                                       |
| Q80X37             | 2.3080E-02 | 3.957 | 5.265 | 6.551 | 10.47 | 10.38  | 9.885 | 9.885 | 10.23 | CD44 antigen OS=Mus musculus GN=CD44 PE=1 SV=1                                                                                       |
| Q9CWJ9             | 2.3065E-02 | 72.81 | 82.13 | 58.02 | 106.3 | 51.6   | 43.4  | 38.31 | 54.66 | Bifunctional purine biosynthesis protein PURH OS=Mus musculus GN=Atic PE=1 SV=2                                                      |
| Q9S5F7             | 2.3864E-02 | 4.749 | 2.106 | 3.743 | 0     | 7.478  | 11.32 | 8.65  | 7.672 | Inulin-like growth factor 2 mRNA-binding protein 2 OS=Mus musculus GN=Igf2bp2 PE=1 SV=1                                              |
| A8X8Z3             | 2.4209E-02 | 4.749 | 2.106 | 3.743 | 0     | 7.478  | 11.32 | 8.65  | 5.967 | Inulin-like growth factor 2 mRNA-binding protein 2 OS=Mus musculus GN=Igf2bp2 PE=1 SV=1                                              |
| Q3TTF6             | 2.4930E-02 | 3.166 | 8.424 | 5.615 | 5.904 | 0      | 0     | 0     | 2.557 | Putative uncharacterized protein OS=Mus musculus GN=Ppuz21b PE=1 SV=1                                                                |
| H8BKU1             | 2.4930E-02 | 3.166 | 8.424 | 5.615 | 5.904 | 0      | 0     | 0     | 2.557 | Putative phosphatase 2 (Formerly 2A), regulatory subunit A (PR 65), beta isoform, isoform CRA_b OS=Mus musculus GN=Ppuz21b PE=1 SV=1 |
| G3UW54             | 2.4930E-02 | 3.166 | 8.424 | 5.615 | 5.904 | 0      | 0     | 0     | 2.557 | Serine/threonine-protein phosphatase 2A 65 kDa regulatory subunit A beta isoform OS=Mus musculus GN=Ppuz21b PE=1 SV=1                |
| H3BL00             | 2.4930E-02 | 3.166 | 8.424 | 5.615 | 5.904 | 0      | 0     | 0     | 2.557 | Serine/threonine-protein phosphatase 2A 65 kDa regulatory subunit A beta isoform OS=Mus musculus GN=Ppuz21b PE=1 SV=1                |
| EQ0U11             | 2.4974E-02 | 14.25 | 11.58 | 9.359 | 2.991 | 4.718  | 6.178 | 6.178 | 5.967 | 60S ribosomal protein S11 OS=Mus musculus GN=Rps11 PE=1 SV=1                                                                         |
| P43Z47             | 2.5520E-02 | 11.08 | 10.53 | 2.808 | 8.857 | 0      | 0     | 0     | 1.705 | DNA mismatch repair protein Msh2 OS=Mus musculus GN=Msh2 PE=1 SV=1                                                                   |
| V9GXB6             | 2.5604E-02 | 2.374 | 3.159 | 3.743 | 5.904 | 0      | 1.887 | 0     | 4.262 | Heterogeneous nuclear ribonucleoprotein L-like OS=Mus musculus GN=HnmpL PE=1 SV=1                                                    |
| Q6P2B1             | 2.5639E-02 | 71.23 | 9.477 | 5.615 | 11.81 | 4.487  | 0     | 0     | 2.557 | Transportin-3 OS=Mus musculus GN=Trtp3 PE=1 SV=1                                                                                     |
| Q90797             | 2.5767E-02 | 11.08 | 15.8  | 13.1  | 0     | 31.41  | 35.85 | 21.01 | 31.54 | Galecin-3-binding protein OS=Mus musculus GN=Lgk3b PE=1 SV=1                                                                         |
| EQ9N16             | 2.5888E-02 | 2.106 | 2.106 | 1.872 | 2.991 | 5.661  | 3.707 | 3.707 | 5.967 | Unconventional myosin-b OS=Mus musculus GN=Myo1b PE=1 SV=1                                                                           |
| EQ9S80             | 2.5888E-02 | 0     | 2.106 | 1.872 | 0     | 2.991  | 5.661 | 3.707 | 5.967 | Unconventional myosin-b OS=Mus musculus GN=Myo1b PE=1 SV=1                                                                           |
| P46735             | 2.5888E-02 | 0     | 2.106 | 1.872 | 0     | 2.991  | 5.661 | 3.707 | 5.967 | Unconventional myosin-b OS=Mus musculus GN=Myo1b PE=1 SV=3                                                                           |
| Q7QD7D             | 2.5888E-02 | 0     | 2.106 | 1.872 | 0     | 2.991  | 5.661 | 3.707 | 5.967 | Myo1b protein OS=Mus musculus GN=Myo1b PE=1 SV=1                                                                                     |
| A6ZD44             | 2.5873E-02 | 52.24 | 78.98 | 56.15 | 76.76 | 99.45  | 106.6 | 103.8 | 90.36 | Fruiteose oxidase aldolase OS=Mus musculus GN=Alod PE=1 SV=1                                                                         |
| P80311             | 2.5985E-02 | 72.81 | 82.13 | 58.02 | 53.14 | 47.11  | 35.85 | 39.24 | 40.92 | T-complex protein 1 subunit gamma OS=Mus musculus GN=Ctcf1 PE=1 SV=1                                                                 |
| G3X9K9             | 2.6066E-02 | 0     | 0     | 8.423 | 0     | 3.739  | 11.32 | 13.59 | 6.819 | Proteasome activator complex subunit 1 OS=Mus musculus GN=Pamc1 PE=1 SV=1                                                            |
| P62071             | 2.6161E-02 | 71.23 | 0     | 2.808 | 0     | 9.721  | 12.27 | 14.83 | 11.08 | Ras-related protein R-Ras2 OS=Mus musculus GN=Rras2 PE=1 SV=1                                                                        |
| Q6ZW76             | 2.6250E-02 | 0     | 0     | 3.743 | 0     | 4.487  | 5.661 | 4.943 | 4.262 | 60S ribosomal protein L35 OS=Mus musculus GN=Rpl35 PE=1 SV=1                                                                         |
| EQ90K6             | 2.6470E-02 | 23.74 | 29.48 | 23.74 | 8.857 | 14.966 | 2.831 | 0     | 3.41  | Deoxynucleoside triphosphate triphosphatase SAMHD1 OS=Mus musculus GN=Samhd1 PE=1 SV=1                                               |
| Q60710             | 2.6988E-02 | 23.74 | 29.48 | 25.27 | 8.857 | 14.966 | 2.831 | 0     | 3.41  | Deoxynucleoside triphosphate triphosphatase SAMHD1 OS=Mus musculus GN=Samhd1 PE=1 SV=2                                               |
| F8WJED             | 2.6988E-02 | 23.74 | 29.48 | 25.27 | 8.857 | 14.966 | 2.831 | 0     | 3.41  | Deoxynucleoside triphosphate triphosphatase SAMHD1 OS=Mus musculus GN=Samhd1 PE=1 SV=1                                               |
| P07742             | 2.7021E-02 | 91.81 | 78.98 | 73    | 32.47 | 7.478  | 13.21 | 0     | 15.34 | Ribonucleoside-diphosphate reductase large subunit OS=Mus musculus GN=RrmL PE=1 SV=2                                                 |
| P50396             | 2.7088E-02 | 6.332 | 5.265 | 3.743 | 5.904 | 13.46  | 14.86 | 12.27 | 13.64 | Rab GDP dissociation inhibitor alpha OS=Mus musculus GN=Gdi1 PE=1 SV=3                                                               |
| K01151             | 2.7088E-02 | 9.497 | 7.371 | 7.487 | 11.81 | 5.962  | 6.178 | 0     | 23.48 | 6.819 Neuronal cell adhesion molecule 2 OS=Mus musculus GN=Ncam1 PE=1 SV=1                                                           |
| ADAM45Y1           | 2.7603E-02 | 0     | 4.212 | 0     | 6.73  | 5.661  | 7.414 | 0     | 6.819 | Neuronal cell adhesion molecule 1 (Fragment) OS=Mus musculus GN=Ncam1 PE=1 SV=1                                                      |
| D3Z279             | 2.7631E-02 | 36.41 | 32.64 | 39.31 | 14.76 | 13.46  | 12.27 | 17.3  | 10.23 | Cyclin-dependent kinase 1 (Fragment) OS=Mus musculus GN=Cdk1 PE=1 SV=1                                                               |
| P59708             | 2.7736E-02 | 0     | 6.318 | 5.615 | 0     | 4.487  | 7.548 | 8.65  | 5.115 | Splicing factor 3B subunit 6 OS=Mus musculus GN=SF3b6 PE=1 SV=1                                                                      |
| A2BH06             | 2.7781E-02 | 26.12 | 29.48 | 35.56 | 47.23 | 17.95  | 14.15 | 19.77 | 18.75 | 60S ribosomal protein L11 (Fragment) OS=Mus musculus GN=Rpl11 PE=1 SV=1                                                              |
| F65V11             | 2.7829E-02 | 9.497 | 8.424 | 9.679 | 8.857 | 4.487  | 3.774 | 3.707 | 4.252 | Protein Gm903 OS=Mus musculus GN=Gm903 PE=1 SV=1                                                                                     |
| AA1ADGRR3          | 2.7906E-02 | 20.58 | 17.79 | 22.46 | 11.81 | 13.42  | 12.79 | 14.83 | 10.23 | 60S ribosomal protein S11 OS=Mus musculus GN=Rps11 PE=1 SV=1                                                                         |
| P70349             | 2.7930E-02 | 3.166 | 6.318 | 7.487 | 0     | 16.45  | 11.32 | 12.36 | 8.524 | Histidine triad nucleotide-binding protein 1 OS=Mus musculus GN=Htnr1 PE=1 SV=3                                                      |
| P11688             | 2.8182E-02 | 3.957 | 0     | 2.808 | 0     | 27.67  | 22.64 | 7.414 | 23.02 | Integrin alpha-5 OS=Mus musculus GN=Iiga5 PE=1 SV=3                                                                                  |
| Q8R010             | 2.8209E-02 | 34.03 | 41.07 | 39.31 | 88.57 | 8.225  | 0     | 0     | 8.524 | Aminoacyl tRNA synthetase complex-interacting multifunctional protein 2 OS=Mus musculus GN=Aimp2 PE=1 SV=2                           |
| P50664             | 2.8302E-02 | 54.44 | 78.98 | 56.15 | 76.76 | 99.45  | 106.6 | 103.8 | 89.21 | Fruiteose oxidase aldolase OS=Mus musculus GN=Alod PE=1 SV=2                                                                         |
| P62651             | 2.8516E-02 | 11.14 | 11.48 | 12.45 | 11.2  | 14.4   | 13.21 | 19.5  | 138.1 | Elongation factor 1-delta OS=Mus musculus GN=Ef1d PE=1 SV=1                                                                          |
| Q8JZV7             | 2.8676E-02 | 1.583 | 0     | 3.743 | 0     | 5.234  | 5.661 | 4.943 | 4.262 | N-acetylglucosamine-6-phosphate deacetylase OS=Mus musculus GN=Amhd2 PE=1 SV=1                                                       |
| EQ9390             | 2.8964E-02 | 82.31 | 85.29 | 77.68 | 59.04 | 11.14  | 13.11 | 135.9 | 156.8 | Myoferlin OS=Mus musculus GN=Myof PE=1 SV=2                                                                                          |
| A2APM3             | 2.9386E-02 | 3.957 | 5.265 | 6.551 | 10.47 | 9.435  | 9.885 | 9.885 | 10.23 | CD44 antigen OS=Mus musculus GN=CD44 PE=1 SV=1                                                                                       |
| A2APM4             | 2.9386E-02 | 3.957 | 5.265 | 6.551 | 10.47 | 9.435  | 9.885 | 9.885 | 10.23 | CD44 antigen OS=Mus musculus GN=CD44 PE=1 SV=1                                                                                       |
| A2APM2             | 2.9386E-02 | 3.957 | 5.265 | 6.551 | 10.47 | 9.435  | 9.885 | 9.885 | 10.23 | CD44 antigen OS=Mus musculus GN=CD44 PE=1 SV=1                                                                                       |
| EQ9KM8             | 2.9386E-02 | 3.957 | 5.265 | 6.551 | 10.47 | 9.435  | 9.885 | 9.885 | 10.23 | CD44 antigen OS=Mus musculus GN=CD44 PE=1 SV=1                                                                                       |
| Q3U8S1             | 2.9386E-02 | 3.957 | 5.265 | 6.551 | 10.47 | 9.435  | 9.885 | 9.885 | 10.23 | CD44 antigen OS=Mus musculus GN=CD44 PE=1 SV=1                                                                                       |
| P54754             | 2.9759E-02 | 0     | 0     | 4.679 | 0     | 3.739  | 6.605 | 6.178 | 5.115 | Ephrin type-B receptor 3 OS=Mus musculus GN=Efrb3 PE=1 SV=2                                                                          |
| connamant_KERATIN6 | 2.9775E-02 | 9.497 | 6.318 | 12.17 | 8.857 | 12.17  | 17.93 | 16.06 | 6.819 | non description                                                                                                                      |
| Q6ZM11             | 2.9854E-02 | 8.87  | 85.29 | 77.68 | 59.04 | 11.14  | 13.11 | 135.9 | 156.8 | Myoferlin OS=Mus musculus GN=Myof PE=1 SV=2                                                                                          |
| P62960             | 3.0311E-02 | 3.166 | 30.54 | 25.27 | 26.57 | 15.7   | 14.15 | 19.77 | 19.61 | Nuclease-sensitive element-binding protein 1 OS=Mus musculus GN=Yxb1 PE=1 SV=3                                                       |
| P17426             | 3.0555E-02 | 6.332 | 5.265 | 3.743 | 0     | 9.721  | 9.435 | 6.178 | 7.672 | AP-2 complex subunit alpha-1 OS=Mus musculus GN=Ap2l PE=1 SV=1                                                                       |
| P13595             | 3.0679E-02 | 0     | 4.212 | 0     | 0     | 7.478  | 5.661 | 7.414 | 8.524 | Neuronal cell adhesion molecule 1 OS=Mus musculus GN=Ncam1 PE=1 SV=3                                                                 |
| EQ9B01             | 3.0679E-02 | 0     | 4.212 | 0     | 0     | 7.478  | 5.661 | 7.414 | 8.524 | Neuronal cell adhesion molecule 1 OS=Mus musculus GN=Ncam1 PE=1 SV=2                                                                 |
| ADAM45Y2           | 3.0679E-02 | 0     | 4.212 | 0     | 0     | 7.478  | 5.661 | 7.414 | 8.524 | Neuronal cell adhesion molecule 1 OS=Mus musculus GN=Ncam1 PE=1 SV=1                                                                 |
| Q0S816             | 3.0910E-02 | 3.957 | 4.212 | 3.743 | 0     | 35.89  | 32.08 | 9.885 | 21.31 | Fatty acid-binding protein, epidermal OS=Mus musculus GN=Fabp5 PE=1 SV=3                                                             |
| Q64282             | 3.1493E-02 | 1.583 | 0     | 0     | 0     | 5.982  | 9.435 | 16.06 | 7.672 | Interferon-induced protein with tetrapeptide repeats 1 OS=Mus musculus GN=Ifit1 PE=1 SV=2                                            |
| Q99BZ5             | 3.1550E-02 | 5.54  | 7.371 | 3.743 | 8.857 | 3.739  | 0     | 0     | 2.557 | Eukaryotic translation initiation factor 3 subunit K OS=Mus musculus GN=Ef3k PE=1 SV=1                                               |
| Q3JL25             | 3.1860E-02 | 45.33 | 43.17 | 39.31 | 29.52 | 19.44  | 21.7  | 19.77 | 25.57 | DNA helicase OS=Mus musculus GN=Kmf6 PE=1 SV=1                                                                                       |
| P97311             | 3.1860E-02 | 45.33 | 43.17 | 39.31 | 29.52 | 19.44  | 21.7  | 19.77 | 25.57 | DNA replication licensing factor MCM6 OS=Mus musculus GN=Mcm6 PE=1 SV=1                                                              |
| Q9ESX3             | 3.2023E-02 | 8.706 | 10.53 | 10.29 | 0     | 16.45  | 14.15 | 22.24 | 15.34 | HACA ribonucleoprotein complex subunit 4 OS=Mus musculus GN=Dkl1 PE=1 SV=4                                                           |
| Q921M3             | 3.2054E-02 | 12.66 | 11.58 | 12.66 | 11.81 | 6.73   | 6.605 | 9.885 | 9.377 | Splicing factor 3B subunit 3 OS=Mus musculus GN=SF3b3 PE=1 SV=1                                                                      |
| Q04750             | 3.2434E-02 | 11.87 | 21.06 | 20.59 |       |        |       |       |       |                                                                                                                                      |

|            |            |        |       |       |       |       |       |       |       |                                                                                                                        |
|------------|------------|--------|-------|-------|-------|-------|-------|-------|-------|------------------------------------------------------------------------------------------------------------------------|
| O08553     | 4.4363E-02 | 35.62  | 35.8  | 33.69 | 11.81 | 68.05 | 76.42 | 42.01 | 70.75 | Dihydropyrimidinase-related protein 2 OS=Mus musculus GN=Dpysl2 PE=1 SV=2                                              |
| A2A5N1     | 4.4372E-02 | 16.62  | 8.424 | 15.91 | 14.76 | 18.69 | 16.98 | 19.77 | 18.75 | 14-3-3 protein beta/alpha (Fragment) OS=Mus musculus GN=Ywhab PE=1 SV=1                                                |
| Q61072     | 4.4523E-02 | 0      | 3.159 | 2.808 | 0     | 3.739 | 6.605 | 14.83 | 10.23 | Disintegrin and metalloproteinase domain-containing protein 9 OS=Mus musculus GN=Adam9 PE=1 SV=2                       |
| E9Q638     | 4.4523E-02 | 0      | 3.159 | 2.808 | 0     | 3.739 | 6.605 | 14.83 | 10.23 | Disintegrin and metalloproteinase domain-containing protein 9 OS=Mus musculus GN=Adam9 PE=1 SV=1                       |
| A0A140LHU0 | 4.4523E-02 | 0      | 3.159 | 2.808 | 0     | 3.739 | 6.605 | 14.83 | 10.23 | Disintegrin and metalloproteinase domain-containing protein 9 OS=Mus musculus GN=Adam9 PE=1 SV=1                       |
| P40124     | 4.4783E-02 | 22.16  | 21.06 | 19.65 | 26.57 | 28.42 | 43.4  | 54.37 | 42.62 | Adenylyl cyclase-associated protein 1 OS=Mus musculus GN=Cap1 PE=1 SV=4                                                |
| Q6Q477     | 4.4867E-02 | 2.374  | 0     | 3.743 | 0     | 3.739 | 3.774 | 4.943 | 4.262 | Plasma membrane calcium-transporting ATPase 4 OS=Mus musculus GN=Atp2b4 PE=1 SV=1                                      |
| Q6DFW4     | 4.4909E-02 | 12.466 | 14.74 | 16.85 | 5.904 | 5.982 | 3.774 | 4.943 | 4.262 | Nucleolar protein 58 OS=Mus musculus GN=Nops58 PE=1 SV=1                                                               |
| Q61024     | 4.5088E-02 | 42.74  | 50.54 | 46.79 | 23.62 | 61.32 | 74.54 | 72.91 | 85.24 | Arginase cytochrome [glutamine-hydrolyzing] OS=Mus musculus GN=Asns PE=1 SV=3                                          |
| A2AFK7     | 4.5242E-02 | 37.2   | 28.43 | 34.63 | 23.62 | 9.721 | 20.76 | 8.65  | 14.49 | Eukaryotic initiation factor 4A-III (Fragment) OS=Mus musculus GN=EIF4a3 PE=1 SV=1                                     |
| P06151     | 4.5821E-02 | 22.16  | 21.06 | 17.78 | 41.33 | 38.14 | 33.97 | 38.31 | 43.47 | L-lactate dehydrogenase A chain OS=Mus musculus GN=Ldha PE=1 SV=3                                                      |
| Q8BY71     | 4.6495E-02 | 11.08  | 10.53 | 10.29 | 5.904 | 2.243 | 2.831 | 0     | 5.115 | Histone acetyltransferase type B catalytic subunit OS=Mus musculus GN=Hat1 PE=1 SV=1                                   |
| A2ATU9     | 4.6495E-02 | 11.08  | 10.53 | 10.29 | 5.904 | 2.243 | 2.831 | 0     | 5.115 | Histone acetyltransferase type B catalytic subunit OS=Mus musculus GN=Hat1 PE=1 SV=1                                   |
| P32885     | 4.6516E-02 | 7.123  | 0     | 6.551 | 0     | 8.225 | 6.605 | 11.12 | 8.524 | GTPase KRas OS=Mus musculus GN=Kras PE=1 SV=1                                                                          |
| P14211     | 4.6848E-02 | 7.123  | 7.371 | 9.359 | 11.81 | 13.46 | 12.27 | 12.36 | 12.79 | Calreticulin OS=Mus musculus GN=Calr PE=1 SV=1                                                                         |
| Q8K1K2     | 4.6992E-02 | 15.04  | 21.06 | 14.97 | 8.857 | 8.225 | 7.548 | 2.471 | 6.819 | 26S protease regulatory subunit 8 OS=Mus musculus GN=Panc5 PE=1 SV=1                                                   |
| A0A1B0GSR9 | 4.8281E-02 | 22.16  | 21.06 | 16.85 | 41.33 | 38.14 | 33.97 | 38.31 | 43.47 | L-lactate dehydrogenase OS=Mus musculus GN=Ldha PE=1 SV=1                                                              |
| Q7TNC4     | 4.8377E-02 | 2.374  | 3.159 | 5.615 | 8.857 | 1.496 | 0     | 0     | 2.557 | Panicle RNA-binding protein Lac7-like 2 OS=Mus musculus GN=Lac72 PE=1 SV=1                                             |
| A2AGT5     | 4.8740E-02 | 3.957  | 3.159 | 3.743 | 11.81 | 0     | 0     | 0     | 1.705 | Cytoskeleton-associated protein 5 OS=Mus musculus GN=Ckap5 PE=1 SV=1                                                   |
| ZHYL78     | 4.8740E-02 | 3.957  | 3.159 | 3.743 | 11.81 | 0     | 0     | 0     | 1.705 | Cytoskeleton-associated protein 5 OS=Mus musculus GN=Ckap5 PE=1 SV=1                                                   |
| K3W4R5     | 4.8740E-02 | 3.957  | 3.159 | 3.743 | 11.81 | 0     | 0     | 0     | 1.705 | Cytoskeleton-associated protein 5 OS=Mus musculus GN=Ckap5 PE=1 SV=1                                                   |
| A0A0R4J0K2 | 4.8740E-02 | 3.957  | 3.159 | 3.743 | 11.81 | 0     | 0     | 0     | 1.705 | Cytoskeleton-associated protein 5 OS=Mus musculus GN=Ckap5 PE=1 SV=1                                                   |
| P62281     | 4.9547E-02 | 22.95  | 22.11 | 26.2  | 14.76 | 16.45 | 16.98 | 14.83 | 12.79 | 40S ribosomal protein S11 OS=Mus musculus GN=Rps11 PE=1 SV=3                                                           |
| Q9Z210     | 4.9970E-02 | 5.54   | 0     | 4.679 | 0     | 7.478 | 6.605 | 7.414 | 8.524 | Proteasome subunit alpha type-7 OS=Mus musculus GN=Psm7 PE=1 SV=1                                                      |
| Q9WUM3     | 5.0923E-02 | 10.29  | 6.318 | 9.359 | 0     | 11.96 | 25.47 | 22.24 | 20.46 | Coronin-1B OS=Mus musculus GN=Coro1b PE=1 SV=1                                                                         |
| Q9ZD99     | 5.1734E-02 | 32.45  | 36.86 | 35.56 | 14.76 | 11.96 | 12.27 | 9.885 | 13.64 | Eukaryotic translation initiation factor 3 subunit 1 OS=Mus musculus GN=EIF3 PE=1 SV=1                                 |
| Q8CF17     | 5.1872E-02 | 23.74  | 26.33 | 25.27 | 11.81 | 8.973 | 5.661 | 6.178 | 2.471 | DNA-directed RNA polymerase II subunit RPB2 OS=Mus musculus GN=Polr2b PE=1 SV=2                                        |
| Q61398     | 5.2622E-02 | 71.23  | 49.49 | 41.18 | 56.09 | 32.15 | 32.08 | 34.6  | 34.95 | Procollagen C-endopeptidase enhancer 1 OS=Mus musculus GN=Pcoke PE=1 SV=2                                              |
| Q9WV32     | 5.3215E-02 | 33.24  | 34.75 | 35.56 | 20.67 | 25.42 | 17.93 | 14.83 | 17.05 | Actin-related protein 2/3 complex subunit 1B OS=Mus musculus GN=Arpelb PE=1 SV=4                                       |
| Q9WUA3     | 5.3466E-02 | 13.45  | 18.95 | 20.59 | 8.857 | 4.487 | 4.718 | 0     | 5.967 | ATP-dependent 6-phosphofructokinase, platelet type OS=Mus musculus GN=Pfkp PE=1 SV=1                                   |
| Q8C605     | 5.3466E-02 | 13.45  | 18.95 | 20.59 | 8.857 | 4.487 | 4.718 | 0     | 5.967 | ATP-dependent 6-phosphofructokinase OS=Mus musculus GN=Pfkp PE=1 SV=1                                                  |
| P47857     | 5.3649E-02 | 13.45  | 10.53 | 16.85 | 8.857 | 4.487 | 9.435 | 6.178 | 3.41  | ATP-dependent 6-phosphofructokinase, muscle type OS=Mus musculus GN=Pfkcm PE=1 SV=3                                    |
| P17742     | 5.3917E-02 | 41.16  | 28.43 | 23.4  | 0     | 57.58 | 55.67 | 37.07 | 5.257 | Peptidyl-prolyl cis-trans isomerase A OS=Mus musculus GN=Ppa PE=1 SV=2                                                 |
| Q9Z217     | 5.4312E-02 | 6.332  | 8.424 | 4.679 | 0     | 9.721 | 9.435 | 11.12 | 7.672 | MCG13402, isoform CRA_a OS=Mus musculus GN=Ptp1 PE=1 SV=1                                                              |
| Q8BG15     | 5.4782E-02 | 6.332  | 8.424 | 4.679 | 0     | 9.721 | 9.435 | 9.885 | 7.672 | MCG13402, isoform CRA_a OS=Mus musculus GN=Ptp1 PE=1 SV=1                                                              |
| Q80UM3     | 5.5019E-02 | 54.61  | 64.23 | 57.09 | 91.52 | 30.66 | 29.25 | 46.96 | 31.54 | N-alpha-acetyltransferase 15, NatA auxiliary subunit OS=Mus musculus GN=Naa15 PE=1 SV=1                                |
| F7CAZ6     | 5.5925E-02 | 16.62  | 21.06 | 23.4  | 26.57 | 29.91 | 42.46 | 29.66 | 31.54 | F-actin-capping protein subunit beta (Fragment) OS=Mus musculus GN=Capzb PE=1 SV=1                                     |
| Q9D0D9     | 5.6114E-02 | 39.57  | 41.07 | 34.63 | 29.52 | 24.68 | 25.47 | 23.48 | 28.98 | Arginine-tRNA ligase, cytoplasmic OS=Mus musculus GN=Rars PE=1 SV=2                                                    |
| G3LUVZ1    | 5.6359E-02 | 0      | 5.265 | 0     | 0     | 10.47 | 5.661 | 13.59 | 10.23 | Immunoglobulin superfamily member 8 OS=Mus musculus GN=Igsf8 PE=1 SV=1                                                 |
| Q8R366     | 5.6359E-02 | 0      | 5.265 | 0     | 0     | 10.47 | 5.661 | 13.59 | 10.23 | Immunoglobulin superfamily member 8 OS=Mus musculus GN=Igsf8 PE=1 SV=2                                                 |
| A0A0R4J117 | 5.6359E-02 | 0      | 5.265 | 0     | 0     | 10.47 | 5.661 | 13.59 | 10.23 | Immunoglobulin superfamily member 8 OS=Mus musculus GN=Igsf8 PE=1 SV=1                                                 |
| O55023     | 5.6507E-02 | 3.166  | 3.159 | 4.679 | 0     | 9.721 | 7.548 | 4.943 | 5.967 | Inositol monophosphatase 1 OS=Mus musculus GN=Impal PE=1 SV=1                                                          |
| Q8CQ65     | 5.7506E-02 | 20.58  | 17.9  | 22.46 | 8.857 | 32.15 | 34.91 | 23.48 | 28.13 | S-methyl-5-thioadenosine phosphorylase OS=Mus musculus GN=Map PE=1 SV=1                                                |
| Q8C253     | 5.7683E-02 | 20.58  | 13.69 | 15.91 | 8.857 | 23.93 | 38.68 | 25.95 | 28.13 | Galecin OS=Mus musculus GN=Lgals1 PE=1 SV=1                                                                            |
| P19157     | 5.8350E-02 | 15.83  | 20.01 | 14.97 | 23.62 | 14.21 | 11.32 | 0     | 16.2  | Glutathione S-transferase P 1 OS=Mus musculus GN=Gstp1 PE=1 SV=2                                                       |
| Q91Z25     | 5.8410E-02 | 33.24  | 34.75 | 35.56 | 20.67 | 26.17 | 16.98 | 14.83 | 17.05 | Actin-related protein 2/3 complex subunit 1B OS=Mus musculus GN=Arpelb PE=1 SV=1                                       |
| E9PV04     | 5.8565E-02 | 39.57  | 0     | 40.24 | 26.57 | 10.47 | 0     | 14.83 | 0     | Protein Gm8994 OS=Mus musculus GN=Gm8994 PE=3 SV=2                                                                     |
| P21278     | 5.8728E-02 | 6.332  | 9.477 | 10.29 | 5.904 | 2.991 | 4.718 | 0     | 3.41  | Guanine nucleotide-binding protein subunit alpha-11 OS=Mus musculus GN=Gnal1 PE=1 SV=1                                 |
| D3Z2H9     | 5.8939E-02 | 21.37  | 27.38 | 23.4  | 38.38 | 42.62 | 50.01 | 48.19 | 38.36 | Protein Tpm3+7 OS=Mus musculus GN=Tpm3+7 PE=3 SV=1                                                                     |
| Q7M6Z3     | 5.8950E-02 | 63.32  | 48.44 | 69.25 | 73.8  | 51.6  | 45.29 | 42.01 | 50.29 | Serine/threonine-protein phosphatase 2A 65 kDa regulatory subunit A alpha isoform OS=Mus musculus GN=Ppp2r1a PE=1 SV=3 |
| Q9DC48     | 5.9003E-02 | 3.166  | 5.265 | 3.743 | 0     | 0     | 1.887 | 0     | 0     | Pre-mRNA-processing factor 17 OS=Mus musculus GN=Cdc40 PE=2 SV=1                                                       |
| A0A0P9YUZ4 | 5.8986E-02 | 6.332  | 8.424 | 7.487 | 0     | 6.73  | 14.15 | 14.83 | 9.377 | High mobility group protein B1 (Fragment) OS=Mus musculus GN=Hngb1 PE=1 SV=1                                           |
| P63138     | 5.8986E-02 | 6.332  | 8.424 | 7.487 | 0     | 6.73  | 14.15 | 14.83 | 9.377 | High mobility group protein B1 OS=Mus musculus GN=Hngb1 PE=1 SV=2                                                      |
| F3WID5     | 5.9205E-02 | 21.37  | 29.48 | 0     | 0     | 36.64 | 34.91 | 39.54 | 28.13 | Tropomyosin alpha-1 chain OS=Mus musculus GN=Tpm1 PE=1 SV=1                                                            |
| P11440     | 5.9279E-02 | 61.73  | 51.6  | 53.34 | 14.76 | 19.44 | 17.93 | 18.54 | 14.49 | Cyclin-dependent kinase 1 OS=Mus musculus GN=Cdk1 PE=1 SV=3                                                            |
| A0A0G2JH04 | 5.9457E-02 | 13.45  | 9.477 | 16.85 | 26.57 | 0     | 9.435 | 0     | 11.49 | Eukaryotic translation initiation factor 4E OS=Mus musculus GN=EIF4 PE=1 SV=1                                          |
| A2AW41     | 5.9822E-02 | 3.957  | 0     | 4.679 | 0     | 7.478 | 4.718 | 4.943 | 5.967 | Protein Harmp (Fragment) OS=Mus musculus GN=Harmp PE=1 SV=1                                                            |
| Q5SWU9     | 5.9992E-02 | 22.95  | 16.85 | 26.2  | 17.71 | 7.478 | 13.21 | 12.36 | 13.64 | Acetyl-CoA carboxylase 1 OS=Mus musculus GN=Acaca PE=1 SV=1                                                            |

**Table S6.** Shown here are top 100 extracellular vesicle biomarkers matched to the proteomic dataset (Figure 2 e,f).

| Accession                                                                                                                                                                   | T-test p-value | Spectral count for ciliated EV (WT) |         |         |         | Spectral count for non-ciliated (KO) |         |         |         | Description                                                         | References (Pubmed ID) |
|-----------------------------------------------------------------------------------------------------------------------------------------------------------------------------|----------------|-------------------------------------|---------|---------|---------|--------------------------------------|---------|---------|---------|---------------------------------------------------------------------|------------------------|
|                                                                                                                                                                             |                | Sample1                             | Sample2 | Sample3 | Sample4 | Sample1                              | Sample2 | Sample3 | Sample4 |                                                                     |                        |
| <b>Extracellular vesicle biomarkers exclusively expressed in KO cell-derived vesicles (3 protein fractions)</b>                                                             |                |                                     |         |         |         |                                      |         |         |         |                                                                     |                        |
| P16125                                                                                                                                                                      | 3.458E-03      | 0                                   | 0       | 0       | 0       | 11                                   | 13      | 12      | 13      | L-lactate dehydrogenase B chain                                     | 25857718               |
| P35441                                                                                                                                                                      | 7.000E-03      | 0                                   | 0       | 0       | 0       | 4                                    | 7       | 4       | 6       | Thrombospondin-1                                                    | 18494037, 20224111     |
| Q6GQT1                                                                                                                                                                      | 1.173E-02      | 0                                   | 0       | 0       | 0       | 4                                    | 8       | 4       | 6       | Alpha-2-macroglobulin-P                                             | 26027894               |
| <b>Extracellular vesicle biomarkers expressed in both WT and KO cell-derived vesicles (33 protein fractions)</b>                                                            |                |                                     |         |         |         |                                      |         |         |         |                                                                     |                        |
| Q62351                                                                                                                                                                      | 2.907E-04      | 106                                 | 72      | 82      | 24      | 5                                    | 5       | 4       | 10      | Transferrin receptor protein 1                                      | 20424270, 15908444     |
| P60766                                                                                                                                                                      | 1.040E-03      | 26                                  | 22      | 22      | 7       | 82                                   | 63      | 48      | 57      | Cell division control protein 42 homolog                            | 23260141, 25944692     |
| Q61739                                                                                                                                                                      | 1.400E-03      | 36                                  | 26      | 26      | 9       | 6                                    | 6       | 7       | 5       | Integrin alpha-6                                                    | 18494037, 20224111     |
| P10107                                                                                                                                                                      | 1.412E-03      | 90                                  | 73      | 70      | 26      | 229                                  | 152     | 129     | 205     | Annexin A1                                                          | 11390481, 21362503     |
| P80314                                                                                                                                                                      | 1.582E-03      | 217                                 | 145     | 230     | 79      | 76                                   | 70      | 68      | 120     | T-complex protein 1 subunit beta                                    | 23260141, 19415654     |
| F6YY69                                                                                                                                                                      | 3.182E-03      | 89                                  | 81      | 76      | 40      | 23                                   | 26      | 29      | 67      | 14-3-3 protein theta                                                | 25857718               |
| F8WIT2                                                                                                                                                                      | 3.201E-03      | 132                                 | 80      | 104     | 32      | 219                                  | 180     | 123     | 210     | Annexin                                                             | 15210972, 25332113     |
| Q55XR6                                                                                                                                                                      | 3.344E-03      | 414                                 | 294     | 302     | 96      | 189                                  | 174     | 129     | 202     | Clathrin heavy chain                                                | 21136642, 25890246     |
| P18760                                                                                                                                                                      | 3.724E-03      | 67                                  | 60      | 60      | 17      | 134                                  | 96      | 86      | 108     | Cofilin-1                                                           | 16081791, 22635005     |
| B7FAV1                                                                                                                                                                      | 4.455E-03      | 99                                  | 73      | 99      | 20      | 303                                  | 195     | 138     | 211     | Filamin, alpha                                                      | 19351151               |
| P26041                                                                                                                                                                      | 5.195E-03      | 111                                 | 85      | 83      | 28      | 266                                  | 206     | 188     | 192     | Moosin                                                              | 18494037, 12519789     |
| Q9CQV8                                                                                                                                                                      | 6.230E-03      | 73                                  | 54      | 58      | 34      | 29                                   | 21      | 24      | 58      | 14-3-3 protein beta/alpha                                           | 25944692               |
| P40142                                                                                                                                                                      | 6.585E-03      | 63                                  | 52      | 60      | 16      | 38                                   | 39      | 17      | 23      | Transectolase                                                       | 21136642, 19190083     |
| P62874                                                                                                                                                                      | 7.909E-03      | 108                                 | 89      | 75      | 36      | 45                                   | 32      | 32      | 44      | Guanine nucleotide-binding protein G(I)/G(S)/G(T) subunit beta-1    | 20424270, 21595303     |
| P62259                                                                                                                                                                      | 9.277E-03      | 34                                  | 34      | 35      | 14      | 68                                   | 54      | 35      | 71      | 14-3-3 protein epsilon                                              | 15210972, 15326289     |
| Q6PHC1                                                                                                                                                                      | 9.664E-03      | 147                                 | 127     | 136     | 34      | 108                                  | 84      | 64      | 90      | Alpha-enolase                                                       | 19351151, 17956143     |
| P70168                                                                                                                                                                      | 1.050E-02      | 51                                  | 38      | 49      | 14      | 63                                   | 52      | 40      | 58      | Importin subunit beta-1                                             | 23260141, 19056867     |
| P48036                                                                                                                                                                      | 1.273E-02      | 73                                  | 41      | 42      | 16      | 95                                   | 67      | 59      | 84      | Annexin A5                                                          | 11390481               |
| P07356                                                                                                                                                                      | 1.557E-02      | 123                                 | 89      | 75      | 15      | 208                                  | 135     | 97      | 156     | Annexin A2                                                          | 23260141, 15210972     |
| Q61598                                                                                                                                                                      | 1.722E-02      | 18                                  | 14      | 14      | 2       | 55                                   | 29      | 21      | 39      | Rab GDP dissociation inhibitor beta                                 | 19351151               |
| P62962                                                                                                                                                                      | 1.855E-02      | 53                                  | 57      | 56      | 18      | 73                                   | 104     | 70      | 89      | Profilin-1                                                          | 17486113               |
| P63101                                                                                                                                                                      | 1.983E-02      | 78                                  | 75      | 78      | 35      | 54                                   | 31      | 42      | 70      | 14-3-3 protein zeta/delta                                           | 18494037, 20124223     |
| Q07797                                                                                                                                                                      | 2.567E-02      | 14                                  | 15      | 14      | 0       | 42                                   | 38      | 17      | 37      | Galectin-3-binding protein                                          | 19028452               |
| A6Z144                                                                                                                                                                      | 2.587E-02      | 66                                  | 75      | 60      | 26      | 133                                  | 113     | 84      | 106     | Fructose-bisphosphate aldolase                                      | 17486113, 26054723     |
| Q8VDD5                                                                                                                                                                      | 3.386E-02      | 272                                 | 183     | 227     | 83      | 409                                  | 303     | 230     | 305     | Myosin-9                                                            | 23260141               |
| Q01853                                                                                                                                                                      | 3.447E-02      | 45                                  | 26      | 44      | 11      | 120                                  | 98      | 42      | 89      | Transitional endoplasmic reticulum ATPase                           | 21136642               |
| Q61171                                                                                                                                                                      | 3.591E-02      | 7                                   | 2       | 8       | 0       | 32                                   | 28      | 9       | 28      | Peroxisomal protein                                                 | 19351151, 15210972     |
| P80318                                                                                                                                                                      | 3.964E-02      | 161                                 | 123     | 144     | 68      | 99                                   | 88      | 82      | 103     | T-complex protein 1 subunit gamma                                   | 23260141, 11390481     |
| Q9WU78                                                                                                                                                                      | 4.153E-02      | 88                                  | 65      | 57      | 17      | 107                                  | 83      | 68      | 95      | Programmed cell death 6-interacting protein                         | 23658846               |
| Q6ROH7                                                                                                                                                                      | 4.289E-02      | 30                                  | 19      | 25      | 7       | 20                                   | 17      | 10      | 21      | Guanine nucleotide-binding protein G(s) subunit alpha isoforms Xlas | 25890246, 22635005     |
| P57780                                                                                                                                                                      | 4.319E-02      | 46                                  | 42      | 31      | 7       | 76                                   | 53      | 40      | 66      | Alpha-actinin-4                                                     | 23260141               |
| A0A1B0GSX0                                                                                                                                                                  | 4.367E-02      | 28                                  | 20      | 20      | 14      | 52                                   | 36      | 31      | 51      | L-lactate dehydrogenase                                             | 19351151               |
| P17742                                                                                                                                                                      | 5.392E-02      | 52                                  | 27      | 25      | 0       | 77                                   | 59      | 30      | 62      | Peptidyl-prolyl cis-trans isomerase A                               | 17956143               |
| <b>Extracellular vesicle biomarkers expressed in both WT and KO cell-derived vesicles, but were not significant (<math>\geq 0.05</math> p-value) (64 protein fractions)</b> |                |                                     |         |         |         |                                      |         |         |         |                                                                     |                        |
| A0A0U1RQ49                                                                                                                                                                  | 6.535E-02      | 5                                   | 4       | 3       | 0       | 0                                    | 0       | 0       | 0       | Hsp70-binding protein 1                                             | 20224111, 22635005     |
| P84078                                                                                                                                                                      | 6.609E-02      | 20                                  | 12      | 9       | 4       | 22                                   | 18      | 13      | 25      | ADP-ribosylation factor 1                                           | 17486113               |
| P62821                                                                                                                                                                      | 7.497E-02      | 0                                   | 0       | 0       | 0       | 2                                    | 3       | 0       | 3       | Ras-related protein Rab-1A                                          | 19351151, 23658846     |
| Q9WV91                                                                                                                                                                      | 7.938E-02      | 34                                  | 29      | 28      | 6       | 38                                   | 43      | 30      | 47      | Prostaglandin F2 receptor negative regulator                        | 20424270, 23260141     |
| P54116                                                                                                                                                                      | 8.166E-02      | 3                                   | 9       | 10      | 2       | 5                                    | 11      | 8       | 7       | Erythrocyte band 7 integral membrane protein                        | 23260141               |
| P07901                                                                                                                                                                      | 8.858E-02      | 233                                 | 174     | 225     | 50      | 194                                  | 159     | 124     | 177     | Heat shock protein HSP 90-alpha                                     | 18494037, 20224111     |
| E9Q0C3                                                                                                                                                                      | 1.011E-01      | 94                                  | 93      | 104     | 43      | 98                                   | 82      | 59      | 88      | Heat shock protein HSP 90-beta                                      | 23260141, 2333927      |
| P63001                                                                                                                                                                      | 1.021E-01      | 49                                  | 28      | 42      | 10      | 47                                   | 53      | 58      | 60      | Ras-related C3 botulinum toxin substrate 1                          | 18494037               |
| Q9QZF2                                                                                                                                                                      | 1.036E-01      | 13                                  | 15      | 11      | 0       | 3                                    | 3       | 0       | 2       | Glypican-1                                                          | 23260141, 19199708     |
| P53986                                                                                                                                                                      | 1.070E-01      | 16                                  | 12      | 16      | 10      | 8                                    | 7       | 8       | 6       | Monocarboxylate transporter 1                                       | 16081791               |
| Q8VDN2                                                                                                                                                                      | 1.141E-01      | 125                                 | 108     | 113     | 23      | 98                                   | 74      | 50      | 88      | Sodium/potassium-transporting ATPase subunit alpha-1                | 21136642               |
| Q02053                                                                                                                                                                      | 1.204E-01      | 120                                 | 86      | 102     | 22      | 169                                  | 118     | 72      | 116     | Ubiquitin-like modifier-activating enzyme 1                         | 19351151, 26054723     |
| P41731                                                                                                                                                                      | 1.214E-01      | 0                                   | 0       | 3       | 0       | 3                                    | 6       | 4       | 0       | CD63 antigen                                                        | 20424270, 16081791     |
| Q7T750                                                                                                                                                                      | 1.229E-01      | 6                                   | 3       | 0       | 0       | 6                                    | 6       | 8       | 11      | Serine/threonine-protein kinase MRCK beta                           | 15210972, 26054723     |
| Q01279                                                                                                                                                                      | 1.276E-01      | 3                                   | 4       | 0       | 0       | 4                                    | 5       | 5       | 6       | Epidermal growth factor receptor                                    | 19109410, 21059916     |
| Q9D091                                                                                                                                                                      | 1.406E-01      | 10                                  | 4       | 0       | 0       | 10                                   | 7       | 10      | 11      | GTPase NRas                                                         | 23658846, 15326289     |
| P09055                                                                                                                                                                      | 1.447E-01      | 94                                  | 85      | 90      | 29      | 89                                   | 73      | 71      | 78      | Integrin beta-1                                                     | 18494037, 26054723     |
| Q99J16                                                                                                                                                                      | 1.464E-01      | 21                                  | 14      | 16      | 5       | 23                                   | 20      | 18      | 18      | Ras-related protein Rap-1b                                          | 11390481               |
| O08992                                                                                                                                                                      | 1.727E-01      | 17                                  | 14      | 14      | 4       | 24                                   | 16      | 12      | 28      | Syntenin-1                                                          | 16081791, 17641064     |
| O08917                                                                                                                                                                      | 1.893E-01      | 0                                   | 0       | 0       | 0       | 5                                    | 0       | 0       | 6       | Flotillin-1                                                         | 15210972, 21362503     |
| P35700                                                                                                                                                                      | 1.907E-01      | 53                                  | 33      | 51      | 7       | 96                                   | 50      | 31      | 60      | Peroxisomal protein                                                 | 21136642               |
| Q61696                                                                                                                                                                      | 1.991E-01      | 87                                  | 76      | 81      | 39      | 0                                    | 0       | 95      | 0       | Heat shock 70 kDa protein 1A                                        | 19190083               |
| P40240                                                                                                                                                                      | 2.076E-01      | 4                                   | 4       | 0       | 0       | 6                                    | 0       | 0       | 0       | CD9 antigen                                                         | 17700640, 19109410     |
| P62806                                                                                                                                                                      | 2.261E-01      | 288                                 | 226     | 234     | 72      | 327                                  | 315     | 284     | 232     | Histone H4                                                          | 25242146               |
| P68510                                                                                                                                                                      | 2.310E-01      | 22                                  | 18      | 26      | 14      | 16                                   | 18      | 20      | 26      | 14-3-3 protein eta                                                  | 19351151, 19056867     |
| Q9Z1Q5                                                                                                                                                                      | 2.663E-01      | 47                                  | 32      | 37      | 8       | 43                                   | 31      | 27      | 30      | Chloride intracellular channel protein 1                            | 23260141, 26054723     |
| P55258                                                                                                                                                                      | 2.675E-01      | 7                                   | 0       | 7       | 0       | 4                                    | 5       | 7       | 7       | Ras-related protein Rab-8A                                          | 20458337, 25944692     |
| P52480                                                                                                                                                                      | 2.675E-01      | 301                                 | 216     | 239     | 80      | 488                                  | 246     | 166     | 352     | Pyruvate kinase PKM                                                 | 19109410, 19199708     |
| F2Z483                                                                                                                                                                      | 2.734E-01      | 30                                  | 17      | 23      | 7       | 13                                   | 20      | 17      | 19      | T-complex protein 1 subunit alpha                                   | 15210972, 11487543     |
| P10852                                                                                                                                                                      | 3.021E-01      | 35                                  | 26      | 19      | 4       | 33                                   | 27      | 25      | 38      | 4F2 cell-surface antigen heavy chain                                | 23260141, 20224111     |
| P63260                                                                                                                                                                      | 3.054E-01      | 1196                                | 955     | 993     | 449     | 1055                                 | 887     | 881     | 1094    | Actin, cytoplasmic 2                                                | 18494037, 16302729     |
| P21956                                                                                                                                                                      | 3.158E-01      | 230                                 | 171     | 193     | 80      | 218                                  | 198     | 145     | 187     | Lactadherin                                                         | 23260141, 10545503     |
| J3QP71                                                                                                                                                                      | 3.411E-01      | 22                                  | 20      | 17      | 5       | 12                                   | 17      | 15      | 17      | Basigin                                                             | 23260141               |
| P09411                                                                                                                                                                      | 3.450E-01      | 184                                 | 141     | 179     | 76      | 210                                  | 223     | 191     | 223     | Phosphoglycerate kinase 1                                           | 19109410, 11487543     |
| D3Z318                                                                                                                                                                      | 3.624E-01      | 225                                 | 178     | 220     | 75      | 367                                  | 0       | 0       | 244     | Elongation factor 1-alpha 1                                         | 17486113, 15326289     |
| P20029                                                                                                                                                                      | 3.750E-01      | 34                                  | 20      | 26      | 8       | 31                                   | 28      | 8       | 23      | 78 kDa glucose-regulated protein                                    | 17486113, 20224111     |
| H3BK60                                                                                                                                                                      | 3.910E-01      | 0                                   | 0       | 0       | 0       | 0                                    | 0       | 0       | 4       | Caveolin-1                                                          | 26054723               |
| Q9WV5F                                                                                                                                                                      | 3.910E-01      | 0                                   | 4       | 0       | 0       | 0                                    | 0       | 0       | 0       | Epidermal growth factor receptor                                    | 19109410, 21059916     |
| Reverse_spP5825                                                                                                                                                             | 3.910E-01      | 0                                   | 2       | 0       | 0       | 0                                    | 0       | 0       | 0       | Elongation factor 2                                                 | 23260141, 22723089     |
| P68373                                                                                                                                                                      | 3.937E-01      | 220                                 | 149     | 149     | 34      | 186                                  | 135     | 77      | 160     | Tubulin alpha-1C chain                                              | 18494037, 26054723     |
| P35278                                                                                                                                                                      | 4.097E-01      | 8                                   | 8       | 13      | 0       | 5                                    | 3       | 0       | 7       | Ras-related protein Rab-5C                                          | 20424270               |
| P08752                                                                                                                                                                      | 4.204E-01      | 56                                  | 39      | 40      | 11      | 52                                   | 33      | 25      | 47      | Guanine nucleotide-binding protein G(i) subunit alpha-2             | 20424270, 12519789     |
| O35598                                                                                                                                                                      | 4.305E-01      | 4                                   | 5       | 7       | 0       | 8                                    | 7       | 3       | 5       | Disintegrin and metalloproteinase domain-containing protein 10      | 23658846, 21601258     |
| P68369                                                                                                                                                                      | 4.586E-01      | 223                                 | 150     | 153     | 34      | 188                                  | 143     | 77      | 165     | Tubulin alpha-1A chain                                              | 15210972, 22723089     |
| P05213                                                                                                                                                                      | 4.608E-01      | 225                                 | 151     | 152     | 34      | 190                                  | 143     | 76      | 166     | Tubulin alpha-1B chain                                              | 23260141, 19837982     |
| P97429                                                                                                                                                                      | 4.743E-01      | 68                                  | 43      | 52      | 14      | 76                                   | 42      | 43      | 57      | Annexin A4                                                          | 23658846, 25950383     |
| P63017                                                                                                                                                                      | 5.043E-01      | 348                                 | 311     | 313     | 148     | 418                                  | 338     | 237     | 324     | Heat shock cognate 71 kDa protein                                   | 12626558, 19351151     |
| A0A0A0MQF6                                                                                                                                                                  | 5.087E-01      | 137                                 | 109     | 132     | 59      | 182                                  | 134     | 74      | 112     | Glyceraldehyde-3-phosphate dehydrogenase                            | 23658846, 25242146     |
| E9Q1F2                                                                                                                                                                      | 5.280E-01      | 473                                 | 343     | 350     | 95      | 543                                  | 327     | 269     | 465     | Actin, cytoplasmic 1                                                | 19190083, 10545503     |
| A0A0A6YXF6                                                                                                                                                                  | 5.796E-01      | 86                                  | 71      | 58      | 21      | 52                                   | 67      | 83      | 119     | Transforming protein RhoA                                           | 20424270, 26027894     |
| P26040                                                                                                                                                                      | 5.990E-01      | 70                                  | 61      | 65      | 18      | 63                                   | 68      | 64      | 66      | Ezrin                                                               | 16081791               |
| Q3V117                                                                                                                                                                      | 6.037E-01      | 77                                  | 46      | 67      | 26      | 112                                  | 66      | 40      | 85      | ATP-citrate synthase                                                | 23260141, 25265333     |
| Q61187                                                                                                                                                                      | 6.043E-01      | 4                                   | 4       | 0       | 0       | 0                                    | 0       | 0       | 4       | Tumor susceptibility gene 101 protein                               | 19367702, 25265333     |
| Q9EQP2                                                                                                                                                                      | 6.230E-01      | 30                                  | 13      | 18      | 2       | 18                                   | 10      | 8       | 20      | EH domain-containing protein 4                                      | 17486113, 17641064     |
| D3Z1M1                                                                                                                                                                      | 7.025E-01      | 59                                  | 43      | 49      | 9       | 35                                   | 38      |         |         |                                                                     |                        |

**Table S7.** A comparative analysis with primary cilia targeted vesicle study (exocyst-containing vesicles) shows the overlap with an extended list of our significantly expressed EV proteome.

| Accession | Mohieldin et. al Current study                                   | Xiaofeng Zuo et. al 2019                                         |
|-----------|------------------------------------------------------------------|------------------------------------------------------------------|
|           | Description                                                      | Description                                                      |
| G3UZ34    | 116 kDa U5 small nuclear ribonucleoprotein component             | 116 kDa U5 small nuclear ribonucleoprotein component             |
| Q9CQV8    | 14-3-3 protein beta/alpha                                        | 14-3-3 protein beta/alpha                                        |
| P68254    | 14-3-3 protein theta                                             | 14-3-3 protein theta                                             |
| P63101    | 14-3-3 protein zeta/delta                                        | 14-3-3 protein zeta/delta                                        |
| Q3TXS7    | 26S proteasome non-ATPase regulatory subunit 1                   | 26S proteasome non-ATPase regulatory subunit 1                   |
| Q8VDM4    | 26S proteasome non-ATPase regulatory subunit 2                   | 26S proteasome non-ATPase regulatory subunit 2                   |
| P14685    | 26S proteasome non-ATPase regulatory subunit 3                   | 26S proteasome non-ATPase regulatory subunit 3                   |
| P26516    | 26S proteasome non-ATPase regulatory subunit 7                   | 26S proteasome non-ATPase regulatory subunit 7                   |
| P62281    | 40S ribosomal protein S11                                        | 40S ribosomal protein S11                                        |
| P14131    | 40S ribosomal protein S16                                        | 40S ribosomal protein S16                                        |
| P62908    | 40S ribosomal protein S3                                         | 40S ribosomal protein S3                                         |
| Q9CQ60    | 6-phosphogluconolactonase                                        | 6-phosphogluconolactonase                                        |
| Q9CR57    | 60S ribosomal protein L14                                        | 60S ribosomal protein L14                                        |
| P51410    | 60S ribosomal protein L9                                         | 60S ribosomal protein L9                                         |
| Q91Z25    | actin-related protein 2/3 complex subunit 1B                     | actin-related protein 2/3 complex subunit 1B                     |
| P10107    | annexin A1                                                       | annexin A1                                                       |
| P07356    | annexin A2                                                       | annexin A2                                                       |
| Q9D0I9    | Arginine--tRNA ligase, cytoplasmic                               | Arginine--tRNA ligase, cytoplasmic                               |
| Q9CWJ9    | bifunctional purine biosynthesis protein PURH                    | bifunctional purine biosynthesis protein PURH                    |
| Q8R2Q8    | bone marrow stromal antigen 2                                    | bone marrow stromal antigen 2                                    |
| Q8BXX1    | brain-specific angiogenesis inhibitor 1-associated protein 2     | brain-specific angiogenesis inhibitor 1-associated protein 2     |
| O08529    | calpain-2 catalytic subunit                                      | calpain-2 catalytic subunit                                      |
| P14211    | calreticulin                                                     | calreticulin                                                     |
| P05132    | cAMP-dependent protein kinase catalytic subunit alpha            | cAMP-dependent protein kinase catalytic subunit alpha            |
| Q9DBC7    | cAMP-dependent protein kinase type I-alpha regulatory subunit    | cAMP-dependent protein kinase type I-alpha regulatory subunit    |
| P26231    | catenin alpha-1                                                  | catenin alpha-1                                                  |
| Q02248    | catenin beta-1                                                   | catenin beta-1                                                   |
| O35566    | CD151 antigen                                                    | CD151 antigen                                                    |
| F8WGL3    | cofilin-1                                                        | cofilin-1                                                        |
| Q04857    | collagen alpha-1(VI) chain                                       | collagen alpha-1(VI) chain                                       |
| P01027    | complement C3                                                    | complement C3                                                    |
| Q8BH35    | complement component C8 beta chain                               | complement component C8 beta chain                               |
| Q9WUM3    | Coronin-1B                                                       | Coronin-1B                                                       |
| Q7TMB8    | Cytoplasmic FMR1-interacting protein 1                           | Cytoplasmic FMR1-interacting protein 1                           |
| Q9D1A2    | cytosolic non-specific dipeptidase                               | cytosolic non-specific dipeptidase                               |
| Q04750    | DNA topoisomerase 1                                              | DNA topoisomerase 1                                              |
| P10126    | elongation factor 1-alpha 1                                      | elongation factor 1-alpha 1                                      |
| P58252    | elongation factor 2                                              | elongation factor 2                                              |
| Q8R1B4    | eukaryotic translation initiation factor 3 subunit C             | eukaryotic translation initiation factor 3 subunit C             |
| Q8BTM8    | filamin-A                                                        | filamin-A                                                        |
| O70433    | four and a half LIM domains protein 2                            | four and a half LIM domains protein 2                            |
| P05064    | fructose-bisphosphate aldolase A                                 | fructose-bisphosphate aldolase A                                 |
| P16045    | Galectin-1                                                       | Galectin-1                                                       |
| P13020    | gelsolin                                                         | gelsolin                                                         |
| P06745    | glucose-6-phosphate isomerase                                    | glucose-6-phosphate isomerase                                    |
| P62874    | guanine nucleotide-binding protein G(I)/G(S)/G(T) subunit beta-1 | guanine nucleotide-binding protein G(I)/G(S)/G(T) subunit beta-1 |
| D3YZX3    | guanine nucleotide-binding protein G(I)/G(S)/G(T) subunit beta-2 | guanine nucleotide-binding protein G(I)/G(S)/G(T) subunit beta-2 |
| P63158    | high mobility group protein B1                                   | high mobility group protein B1                                   |
| P70349    | Histidine triad nucleotide-binding protein 1                     | Histidine triad nucleotide-binding protein 1                     |
| P15864    | histone H1.2                                                     | histone H1.2                                                     |
| P43274    | histone H1.4                                                     | histone H1.4                                                     |
| F8WJK8    | Hsc70-interacting protein                                        | Hsc70-interacting protein                                        |
| Q61081    | hsp90 co-chaperone Cdc37                                         | hsp90 co-chaperone Cdc37                                         |
| P70168    | importin subunit beta-1                                          | importin subunit beta-1                                          |
| Q8BKC5    | importin-5                                                       | importin-5                                                       |
| Q9EPL8    | importin-7                                                       | importin-7                                                       |
| Q62470    | integrin alpha-3                                                 | integrin alpha-3                                                 |

|        |                                                      |                                                      |
|--------|------------------------------------------------------|------------------------------------------------------|
| P43406 | integrin alpha-V                                     | integrin alpha-V                                     |
| O88792 | junctional adhesion molecule A                       | junctional adhesion molecule A                       |
| P19001 | keratin, type I cytoskeletal 19                      | keratin, type I cytoskeletal 19                      |
| Q61768 | Kinesin-1 heavy chain                                | Kinesin-1 heavy chain                                |
| P16125 | L-lactate dehydrogenase B chain                      | L-lactate dehydrogenase B chain                      |
| P02469 | laminin subunit beta-1                               | laminin subunit beta-1                               |
| P02468 | laminin subunit gamma-1                              | laminin subunit gamma-1                              |
| Q8VDD5 | myosin-9                                             | myosin-9                                             |
| Q8R1F1 | niban-like protein 1                                 | niban-like protein 1                                 |
| Q5SQB0 | nucleophosmin                                        | nucleophosmin                                        |
| P15532 | nucleoside diphosphate kinase A                      | nucleoside diphosphate kinase A                      |
| Q01768 | nucleoside diphosphate kinase B                      | nucleoside diphosphate kinase B                      |
| P17742 | peptidyl-prolyl cis-trans isomerase A                | peptidyl-prolyl cis-trans isomerase A                |
| Q9CR16 | Peptidyl-prolyl cis-trans isomerase D                | Peptidyl-prolyl cis-trans isomerase D                |
| Q9DBJ1 | phosphoglycerate mutase 1                            | phosphoglycerate mutase 1                            |
| B1AX58 | plastin-3                                            | plastin-3                                            |
| P70398 | probable ubiquitin carboxyl-terminal hydrolase FAF-X | probable ubiquitin carboxyl-terminal hydrolase FAF-X |
| P62962 | profilin-1                                           | profilin-1                                           |
| Q9QUR6 | prolyl endopeptidase                                 | prolyl endopeptidase                                 |
| P97371 | proteasome activator complex subunit 1               | proteasome activator complex subunit 1               |
| Q9Z2U0 | proteasome subunit alpha type-7                      | proteasome subunit alpha type-7                      |
| P27773 | protein disulfide-isomerase A3                       | protein disulfide-isomerase A3                       |
| P14069 | Protein S100-A6                                      | Protein S100-A6                                      |
| P19221 | prothrombin                                          | prothrombin                                          |
| Q61598 | rab GDP dissociation inhibitor beta                  | rab GDP dissociation inhibitor beta                  |
| P24549 | retinal dehydrogenase 1                              | retinal dehydrogenase 1                              |
| Q99PT1 | rho GDP-dissociation inhibitor 1                     | rho GDP-dissociation inhibitor 1                     |
| Q6P5B0 | RRP12-like protein                                   | RRP12-like protein                                   |
| P60122 | ruvB-like 1                                          | ruvB-like 1                                          |
| H3BLJ9 | S-formylglutathione hydrolase                        | S-formylglutathione hydrolase                        |
| P17563 | Selenium-binding protein 1                           | Selenium-binding protein 1                           |
| P84104 | serine/arginine-rich splicing factor 3               | serine/arginine-rich splicing factor 3               |
| P14094 | sodium/potassium-transporting ATPase subunit beta-1  | sodium/potassium-transporting ATPase subunit beta-1  |
| Q60864 | Stress-induced-phosphoprotein 1                      | Stress-induced-phosphoprotein 1                      |
| Q8CG48 | structural maintenance of chromosomes protein 2      | structural maintenance of chromosomes protein 2      |
| G5E839 | T-complex protein 1 subunit delta                    | T-complex protein 1 subunit delta                    |
| P80313 | T-complex protein 1 subunit eta                      | T-complex protein 1 subunit eta                      |
| P35441 | thrombospondin-1                                     | thrombospondin-1                                     |
| Q93092 | Transaldolase                                        | Transaldolase                                        |
| Q62351 | transferrin receptor protein 1                       | transferrin receptor protein 1                       |
| P40142 | transketolase                                        | transketolase                                        |
| Q8BFY9 | transportin-1                                        | transportin-1                                        |
| Q9CWF2 | tubulin beta-2B chain                                | tubulin beta-2B chain                                |
| P48428 | tubulin-specific chaperone A                         | tubulin-specific chaperone A                         |
| E9Q634 | unconventional myosin-I                              | unconventional myosin-I                              |
| P20152 | vimentin                                             | vimentin                                             |
| Q64727 | vinculin                                             | vinculin                                             |
| O88342 | WD repeat-containing protein 1                       | WD repeat-containing protein 1                       |
| Q62523 | Zyxin                                                | Zyxin                                                |

**Table S8.** Shown here are the list of 30 exclusively expressed EV proteins isolated from ciliary WT (Table S3) that matched with known cilia specific markers.

| Accession | Mohieldin et. al Current study                                                   | David U. Mick et. al 2015                                                        |
|-----------|----------------------------------------------------------------------------------|----------------------------------------------------------------------------------|
|           | Cilia Specific Protein Descriptions                                              | Cilia Specific Protein Descriptions                                              |
| Q571I9    | Aldehyde dehydrogenase family 16 member A1                                       | Aldehyde dehydrogenase family 16 member A1                                       |
| O35566    | CD151 antigen                                                                    | CD151 antigen                                                                    |
| Q549C9    | Cellular tumor antigen p53                                                       | Cellular tumor antigen p53                                                       |
| Q91W50    | Cold shock domain-containing protein E1                                          | Cold shock domain-containing protein E1                                          |
| Q01320    | DNA topoisomerase 2-alpha                                                        | DNA topoisomerase 2-alpha                                                        |
| Q9ERU9    | E3 SUM                                                                           | E3 SUM                                                                           |
| Q99JX4    | Eukaryotic translation initiation factor 3 subunit M                             | Eukaryotic translation initiation factor 3 subunit M                             |
| Q08943    | FACT complex subunit SSRP1                                                       | FACT complex subunit SSRP1                                                       |
| P58854    | Gamma-tubulin complex component 3                                                | Gamma-tubulin complex component 3                                                |
| Q9JHK4    | Geranylgeranyl transferase type-2 subunit alpha                                  | Geranylgeranyl transferase type-2 subunit alpha                                  |
| Q9Z2V5    | Histone deacetylase 6                                                            | Histone deacetylase 6                                                            |
| P43276    | Histone H1.5                                                                     | Histone H1.5                                                                     |
| Q8JZK9    | Hydroxymethylglutaryl-CoA synthase, cytoplasmic                                  | Hydroxymethylglutaryl-CoA synthase, cytoplasmic                                  |
| P19001    | Keratin, type I cytoskeletal 19                                                  | Keratin, type I cytoskeletal 19                                                  |
| Q61001    | Laminin subunit alpha-5                                                          | Laminin subunit alpha-5                                                          |
| P10404    | MLV-related proviral Env polyprotein                                             | MLV-related proviral Env polyprotein                                             |
| Q6ZWQ0    | Nesprin-2                                                                        | Nesprin-2                                                                        |
| Q99P88    | Nuclear pore complex protein Nup155                                              | Nuclear pore complex protein Nup155                                              |
| Q8R480    | Nuclear pore complex protein Nup85                                               | Nuclear pore complex protein Nup85                                               |
| Q6PAV2    | Probable E3 ubiquitin-protein ligase HERC4                                       | Probable E3 ubiquitin-protein ligase HERC4                                       |
| Q810B6    | Rabankyrin-5                                                                     | Rabankyrin-5                                                                     |
| P11370    | Retrovirus-related Env polyprotein from Fv-4 locus                               | Retrovirus-related Env polyprotein from Fv-4 locus                               |
| F8VPK5    | Rho-associated protein kinase                                                    | Rho-associated protein kinase                                                    |
| O88796    | Ribonuclease P protein subunit p30                                               | Ribonuclease P protein subunit p30                                               |
| O35130    | Ribosomal RNA small subunit methyltransferase NEP1                               | Ribosomal RNA small subunit methyltransferase NEP1                               |
| A0A0R4J23 | Septin-10                                                                        | Septin-10                                                                        |
| Q6P5D8    | Structural maintenance of chromosomes flexible hinge domain-containing protein 1 | Structural maintenance of chromosomes flexible hinge domain-containing protein 1 |
| Q9CXF4    | TBC1 domain family member 15                                                     | TBC1 domain family member 15                                                     |
| E9PXY8    | Ubiquitin carboxyl-terminal hydrolase 7                                          | Ubiquitin carboxyl-terminal hydrolase 7                                          |
| E9Q3L1    | Unconventional myosin-VI                                                         | Unconventional myosin-VI                                                         |
